# Supplementary material for: Effects of computerised clinical decision support systems (CDSS) on nursing and allied health professional performance and patient outcomes: a systematic review of experimental and observational studies
Source: PubMed Central journal article supplement (PMC8679061; doi:10.1136/bmjopen-2021-053886), 2021-12-15
Supplement: bmjopen-2021-053886.draft_revisions.pdf [file bmjopen-2021-053886.draft_revisions.pdf]

# BMJ Open

BMJ Open is committed to open peer review. As part of this commitment we make the peer review history of every article we publish publicly available.

When an article is published we post the peer reviewers' comments and the authors' responses online. We also post the versions of the paper that were used during peer review. These are the versions that the peer review comments apply to.

The versions of the paper that follow are the versions that were submitted during the peer review process. They are not the versions of record or the final published versions. They should not be cited or distributed as the published version of this manuscript.

BMJ Open is an open access journal and the full, final, typeset and author-corrected version of record of the manuscript is available on our site with no access controls, subscription charges or pay-per-view fees (<http://bmjopen.bmj.com>).

If you have any questions on BMJ Open's open peer review process please email [info.bmjopen@bmj.com](mailto:info.bmjopen@bmj.com)

# BMJ Open

## Effects of computerised clinical decision support systems (CDSS) on nursing and allied health professional performance and patient outcomes: A systematic review

|                               |                                                                                                                                                                                                                                                                                                                                                                                                                                                                                                                                                                                         |
|-------------------------------|-----------------------------------------------------------------------------------------------------------------------------------------------------------------------------------------------------------------------------------------------------------------------------------------------------------------------------------------------------------------------------------------------------------------------------------------------------------------------------------------------------------------------------------------------------------------------------------------|
| Journal:                      | <i>BMJ Open</i>                                                                                                                                                                                                                                                                                                                                                                                                                                                                                                                                                                         |
| Manuscript ID                 | bmjopen-2021-053886                                                                                                                                                                                                                                                                                                                                                                                                                                                                                                                                                                     |
| Article Type:                 | Original research                                                                                                                                                                                                                                                                                                                                                                                                                                                                                                                                                                       |
| Date Submitted by the Author: | 26-May-2021                                                                                                                                                                                                                                                                                                                                                                                                                                                                                                                                                                             |
| Complete List of Authors:     | Mebrahtu, Teumzghi; University of Leeds<br>Skyrme, Sarah; University of Leeds<br>Yang, Huiqin; University of Leeds<br>Andre, Deirdre; University of Leeds<br>Ledward, Alison; University of Leeds<br>King, Henry; University of Leeds<br>Randell, Rebecca; University of Bradford, Faculty of Health Studies<br>Keenan, Anne-Maree; University of Leeds, Leeds Institute of Rheumatology and Musculoskeletal Medicine<br>Bloor, Karen; University of York, Department of Health Sciences<br>Thompson, Carl; University of Leeds Faculty of Medicine and Health, Applied Health Research |
| Keywords:                     | Health informatics < BIOTECHNOLOGY & BIOINFORMATICS, Information technology < BIOTECHNOLOGY & BIOINFORMATICS, Information management < BIOTECHNOLOGY & BIOINFORMATICS                                                                                                                                                                                                                                                                                                                                                                                                                   |
|                               |                                                                                                                                                                                                                                                                                                                                                                                                                                                                                                                                                                                         |

SCHOLARONE™  
Manuscripts

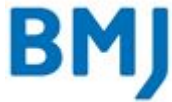

I, the Submitting Author has the right to grant and does grant on behalf of all authors of the Work (as defined in the below author licence), an exclusive licence and/or a non-exclusive licence for contributions from authors who are: i) UK Crown employees; ii) where BMJ has agreed a CC-BY licence shall apply, and/or iii) in accordance with the terms applicable for US Federal Government officers or employees acting as part of their official duties; on a worldwide, perpetual, irrevocable, royalty-free basis to BMJ Publishing Group Ltd ("BMJ") its licensees and where the relevant Journal is co-owned by BMJ to the co-owners of the Journal, to publish the Work in this journal and any other BMJ products and to exploit all rights, as set out in our [licence](#).

The Submitting Author accepts and understands that any supply made under these terms is made by BMJ to the Submitting Author unless you are acting as an employee on behalf of your employer or a postgraduate student of an affiliated institution which is paying any applicable article publishing charge ("APC") for Open Access articles. Where the Submitting Author wishes to make the Work available on an Open Access basis (and intends to pay the relevant APC), the terms of reuse of such Open Access shall be governed by a Creative Commons licence – details of these licences and which [Creative Commons](#) licence will apply to this Work are set out in our licence referred to above.

Other than as permitted in any relevant BMJ Author's Self Archiving Policies, I confirm this Work has not been accepted for publication elsewhere, is not being considered for publication elsewhere and does not duplicate material already published. I confirm all authors consent to publication of this Work and authorise the granting of this licence.

1  
2  
3 **Effects of computerised clinical decision support systems (CDSS) on nursing and allied**  
4 **health professional performance and patient outcomes: A systematic review**  
5  
6  
7

8 Mebrahtu TF<sup>1\*</sup>, Skyrme S<sup>2</sup>, Randell R<sup>3</sup>, Keenan AM<sup>2</sup>, Bloor K<sup>4</sup>, Yang H<sup>2</sup>, Andre D<sup>5</sup>, Ledward A<sup>2</sup>, King H<sup>2</sup>,  
9 Thompson CA<sup>2</sup>  
10  
11  
12

13  
14 <sup>1</sup>School of Computing, Faculty of Engineering and Physical Sciences, University of Leeds, Leeds, UK

15  
16 <sup>2</sup>School of Healthcare, University of Leeds, Leeds, UK

17  
18 <sup>3</sup> Faculty of Health Studies, University of Bradford, Bradford, UK; Wolfson Centre for Applied Health  
19 Research, Bradford, UK

20  
21 <sup>4</sup>Department of Health Sciences, University of York, York, UK

22  
23 <sup>5</sup> Library Services, University of Leeds, Leeds, UK.  
24  
25

26  
27 **\*corresponding author:** [t.f.mebrahtu@leeds.ac.uk](mailto:t.f.mebrahtu@leeds.ac.uk); School of Computing, Faculty of Engineering  
28 and Physical Sciences, University of Leeds, Leeds, LS2 9JT  
29  
30  
31  
32  
33  
34  
35  
36

37 **Keywords:** decision support; nursing; allied health professionals; CDSS; decision making  
38  
39  
40  
41  
42  
43  
44  
45

46 Word count:

47 Abstract=296

48 Main text=3953  
49  
50  
51  
52  
53  
54  
55  
56  
57  
58  
59  
60

**ABSTRACT**

**Objective:** Digital technology designed to support decision making is an increasingly important part of nurse and allied health professional(AHP) roles in delivering healthcare. The impact of these technologies on professionals and patient outcomes has not been systematically reviewed. We aimed to conduct a systematic review to investigate this.

**Materials and Methods:** Various databases(including MEDLINE, EMBASE and CINAHL) were searched for published and unpublished research from inception to February 2021 without language restrictions. Any comparative research studies comparing CDSS with usual care were eligible for inclusion.

**Results:** A total of 36,106 non-duplicate records were identified. Of 35 studies included: 28 were randomised trials, three controlled-before-and-after studies, three interrupted-time-series and one non-randomised trial. There were ~1,318 health professionals and ~67,595 patient participants in the studies. Most studies focused on nurse decision makers(71%) or paramedics(5.7%). CDSS as a standalone, PC/LAPTOP-technology was a feature of 88.7% of the studies; only 8.6% of the studies involved "smart" mobile/handheld-technology.

**Discussion:** CDSS generated a positive effect in 38% of the outcome measures used. Care processes were positively influenced in 47% of the measures adopted. For example, nurses' adherence to hand disinfection guidance, insulin dosing, on-time blood sampling, and documenting care were better if they used CDSS. Patient care outcomes in 40.7% of indicators were better. For example, lower numbers of falls and pressure ulcers, better glycaemic control, screening of malnutrition and obesity, and triaging of were features of professionals using CDSS compared to those who did not.

**Conclusion:** CDSS can positively impact on selected aspects of nurses' and AHPs' performance and care outcomes. However, comparative research is generally low quality, with a wide range of heterogeneous outcomes. After more than 13 years of synthesised research into CDSS in healthcare professions other than medicine, the need for better quality evaluative research remains as pressing.

**Strengths and limitations of the review:**

- The review is based on a comprehensive literature search
- This is the first systematic review of CDSS influence on nursing and AHP performance and outcomes
- Allied Health Professionals are under-represented, with a primary focus on paramedics and physiotherapists
- The number of studies, service users/patients, and health professionals involved was sizable, but outcomes were too heterogeneous to aggregate
- The overall quality of comparative research represented by the included studies was poor.

## INTRODUCTION

Nurses and allied health professionals' (AHPs') judgements and decisions commit financial, human, and technical resources to care in health systems.<sup>1</sup> To support decision making and underpin new roles and ways of delivering services, such as nurse-led primary care,<sup>1</sup> computerised clinical decision support systems (CDSS) have been developed to tailor evidence-based advice provided to clinicians at the point of decision making.

CDSS can improve professional performance by making the basis for decisions explicit; widen available information, encourage more consistent decisions and thus reduce unwarranted variation in processes and patient outcomes.<sup>2-3</sup> CDSS, may also encourage a focus on unimportant problems, hinder care delivery and contribute to a widening of (digital) inequalities.<sup>4-6</sup>

Reviews focusing mainly on doctors, suggest CDSS effects on performance and outcomes are inconsistent<sup>7</sup> but improved care processes<sup>8-9</sup> and reduced morbidity<sup>8</sup> and mortality<sup>10</sup> are possible. These reviews, however, often neglect the multi-disciplinary nature of healthcare delivery and the decisions involved.

Previously synthesised studies of nurses' use of CDSS suggest only limited impact on performance and health outcomes.<sup>11</sup> Digital technology and research evidence have both developed significantly since this review was undertaken. In this review we aim to examine CDSS impact on nurses' and AHP's performance and patient outcomes in the light of developed research and technology.

## REVIEW METHODS

Following best practice principles<sup>12-13</sup> we undertook a systematic review of research into CDSS targeting nurse and AHP decision makers. The protocol was registered with PROSPERO<sup>14</sup> [number: CRD42019147773].

### Literature searching

Initial searches were conducted in November 2019 and updated on 15 February 2021. Searches were not restricted by language. See Supplementary Table 1 for search terms.

1  
2  
3 We searched: MEDLINE(Ovid) , Embase Classic+Embase (Ovid), PsycINFO (Ovid), HMIC (Ovid) Health  
4 Management Information Consortium, AMED (Allied and Complementary Medicine) (Ovid) , CINAHL ,  
5  
6  
7  
8  
9  
10  
11  
12  
13  
14  
15  
16  
17  
18  
19  
20  
21  
22  
23  
24  
25  
26  
27  
28  
29  
30  
31  
32  
33  
34  
35  
36  
37  
38  
39  
40  
41  
42  
43  
44  
45  
46  
47  
48  
49  
50  
51  
52  
53  
54  
55  
56  
57  
58  
59  
60

We searched: MEDLINE(Ovid) , Embase Classic+Embase (Ovid), PsycINFO (Ovid), HMIC (Ovid) Health Management Information Consortium, AMED (Allied and Complementary Medicine) (Ovid) , CINAHL , Cochrane Central Register of Controlled Trials (Wiley, Cochrane Database of Systematic Reviews (Wiley), Social Sciences Citation Index Expanded (Clarivate), ProQuest Dissertations & Theses Abstracts & Index, ProQuest ASSIA (Applied Social Science Index and Abstract), Clinical Trials.gov, World Health Organisation International Clinical Trials Registry (ICTRP), Health Services Research Projects in Progress (HSRProj), OpenClinical([www.OpenClinical.org](http://www.OpenClinical.org)), OpenGrey ( [www.opengrey.eu](http://www.opengrey.eu)), Health.IT.gov, Agency for Healthcare Research and Quality ([www.ahrq.gov](http://www.ahrq.gov) ).

### **Study inclusion and exclusion**

After removing duplicate titles and abstracts, six reviewers (AK, CT, HY, HK RR, SS and TM) independently screened all titles and abstracts. Two reviewers (CT and TM) assessed study relevance using Cochrane Collaboration's Effective Practice and Organisation of Care (EPOC) criteria.<sup>15</sup>

Comparative studies (randomised controlled trials (RCTs), non-randomised trials, controlled before-after (CBA) studies, interrupted time series (ITS) studies and repeated measures studies) comparing CDSS against usual care (i.e., clinical decision making unsupported by CDSS) were eligible for inclusion.

### **Outcomes**

Our primary outcome was adherence of nurses and AHPs to evidence-based recommendations. Secondary outcomes were diagnostic accuracy, time to reach judgment, adverse events, health professional satisfaction, and system and/or implementation costs.

### **Data extraction**

Data on study characteristics and outcomes were independently extracted by two reviewers (CT and TM) using the EPOC standard data collection form.<sup>16</sup>

### **Quality assessment**



1  
2  
3 Study quality and risk of bias was assessed independently by CT and TM using Cochrane Handbook for  
4  
5 Systematic Reviews of Interventions<sup>17</sup> and EPOC guidelines.<sup>18</sup>  
6  
7

8 Each potential source of bias was judged as high, low, or unclear, and an overall 'risk of bias'  
9  
10 classification (high, moderate, or low) assigned to each included study.<sup>17</sup> Studies with low risk of bias  
11  
12 in all domains, or where bias was unlikely to fundamentally alter results, were treated as low risk.  
13  
14 Studies with bias risk in at least one domain, or where bias might alter conclusions, were treated as  
15  
16 unclear. Studies with a high risk of bias in at least one domain, or with a serious bias likely to reduce  
17  
18 the certainty of conclusions, were considered high risk.  
19  
20  
21

## 22 **Data synthesis**

23 Findings were narratively synthesised, regardless of statistical analysis in the primary study. Studies  
24  
25 were grouped by i) similarity in focus or CDSS-type (knowledge based or machine learning), ii) health  
26  
27 professionals targeted, iii) patient group, iv) outcomes reported, and, v) study design.  
28  
29

30 If not reported, we calculated absolute risks from the primary research. Risk differences and 95%  
31  
32 confidence intervals were then calculated from these. Because the CDSS, participants, and  
33  
34 underlying research questions were so heterogeneous no meta-analysis was undertaken.<sup>19</sup>  
35  
36  
37

## 38 **RESULTS**

### 39 **Evidence Quantity**

40 From 36,106 non-duplicate records identified, 35,858 records were excluded after title and abstract  
41  
42 screening. Seven records were identified through forward citation searching. Full text screening was  
43  
44 undertaken on 255 records which led to 220 more records being excluded. Thirty-five studies were  
45  
46 included in the review.<sup>20-51</sup> **Figure 1** illustrates study selection.  
47  
48  
49  
50

### 51 **Study Descriptions**

52 The 35 included studies comprised 28 RCTs (80%), three CBA studies (8.6%), three ITS (8.6%) and one  
53  
54 non-randomised trial (2.8%). Thirty-two studies (91.4%) were peer-reviewed journal articles with  
55  
56 three (8.6%) PhD theses. The public sector funded 74.3% of studies; industry, 5.7%; 17.1% failed to  
57  
58  
59  
60

1  
2  
3 declare funding and 2.9% were unfunded. Most studies were published after 2010 (n=29, 82.9%) with  
4 just two studies during 1997-1999 and 14 (40.0%) in 2000-2010. Sixteen studies (54.3%) were  
5 published after the last significant systematic review on CDSS for nurses' performance and health  
6 outcomes.<sup>11</sup> Circa 1,318 health professionals and 67,595 patients were study participants, mainly in  
7 hospital-based studies (57.1%). Primary care accounted for 17.1% and nursing homes 11.4% of studies.  
8 Western health systems provided the dominant context: US (28.6%); UK (20.0%), Netherlands (17.2%),  
9 Czech Republic and Norway (5.7%) each. With single study representation (2.8%) from Belgium, Brazil,  
10 China, Ghana, Norway, Sweden, Turkey and one multicentre (Austria, Czech Republic, and UK) report.  
11  
12 See **Table 1**.

13  
14 Only one study (of 35) reported had an explicit theory to guide implementation of the CDSS. Almost a  
15 third (28%) published their study protocol – none of which discussed theory-influenced  
16 implementation.

17  
18 Nurses made up the target for the CDSS *and* control groups in 25 (71.4%) studies; paramedics in two  
19 (5.7%) studies. Five studies (14.3%) compared nurses in the intervention (CDSS) group with physicians  
20 in the control. Two studies (5.7%) recruited a combination of nurses and physiotherapists for CDSS  
21 and control groups. Thirty-one studies (88.7%) used a standalone computer-based CDSS; three (8.6%)  
22 used handheld/mobile-based technologies, and just one study (0.2%) using a web-based CDSS. CDSS  
23 were mostly designed with a single function in mind (e.g., disease diagnosis), but some addressed  
24 multiple parts of clinical pathways (e.g., disease diagnosis *and* disease management).

### 25 26 27 **Quality of identified evidence**

28  
29 Except for three RCTs scored as 'Unclear', all studies were at 'high' overall risk of bias. On average,  
30 RCTs scored 'Low' risk of bias in five of nine domains; CBA studies were lower, with four domains; non-  
31 randomised studies scored 'low' for a single domain. The three ITS studies were 'Low' risk of bias in  
32 six (of seven) domains. Evidence quality did not change over time (see Supplementary Table 2).  
33  
34  
35  
36  
37  
38  
39  
40  
41  
42  
43  
44  
45  
46  
47  
48  
49  
50  
51  
52  
53  
54  
55  
56  
57  
58  
59  
60

Figure 1 PRISMA Flow chart of study selection process

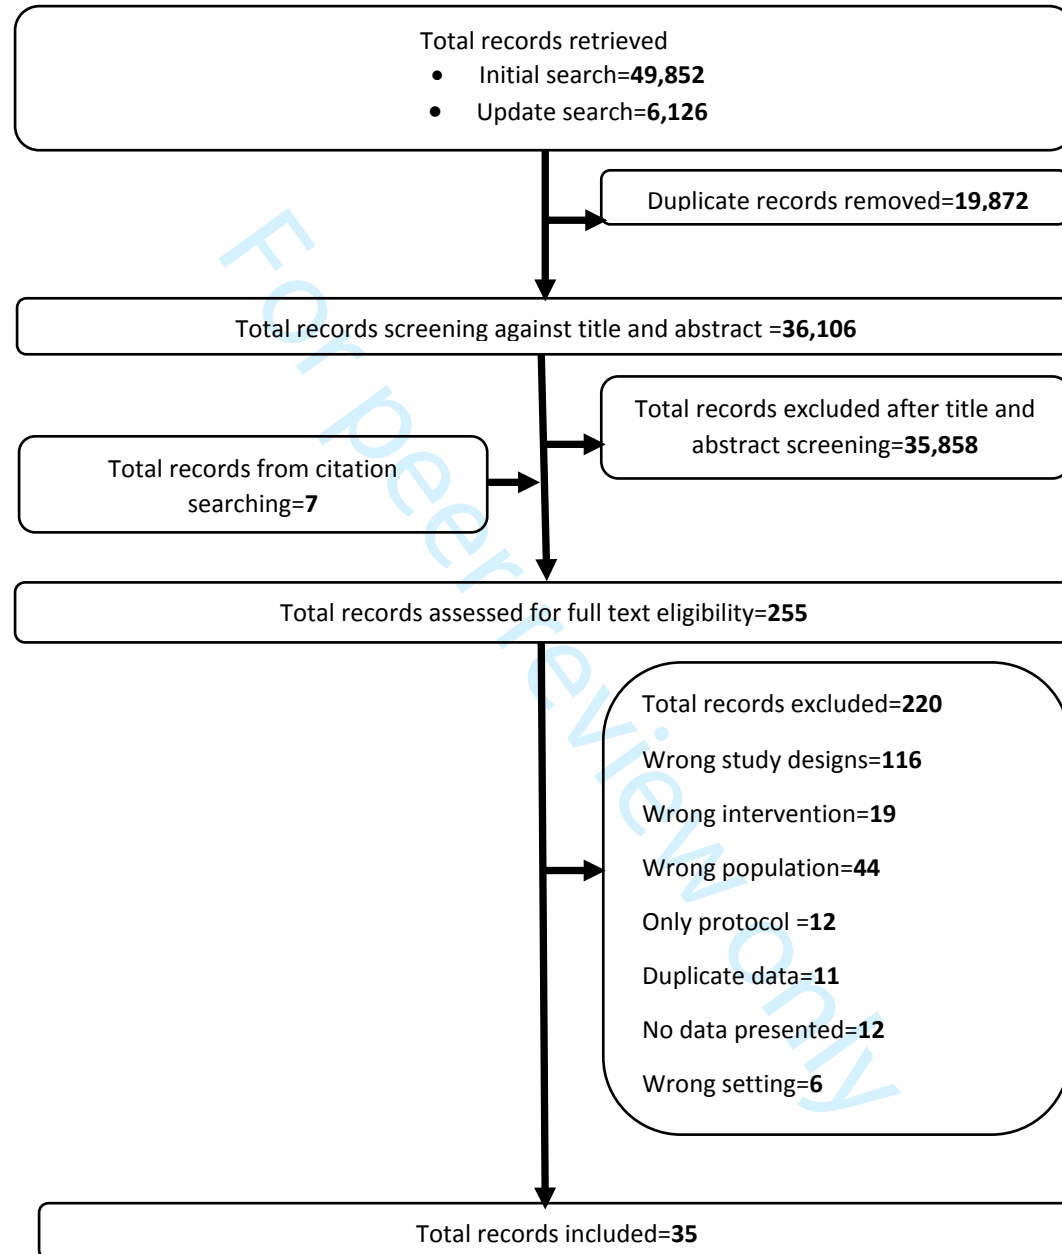

**Table 1 Baseline characteristics of included studies**

| Author and year         | Country        | Design | Setting                                               | Study duration | Healthcare professionals (HP) | Outcomes                                                                                |
|-------------------------|----------------|--------|-------------------------------------------------------|----------------|-------------------------------|-----------------------------------------------------------------------------------------|
| Beeckman et al, 2013    | Belgium        | RCT    | Nursing homes                                         | 5 months       | Nurses and physios            | Risk of pressure ulcers; HP knowledge and attitude                                      |
| Bennet et al, 2016      | UK             | ITS    | Emergency department, district general hospital       | 1 year         | Nurses                        | Triage prioritization; pain assessment and management; management of neutropenic sepsis |
| Blaha et al, 2009       | Czech Republic | RCT    | ICU post elective cardiac surgery university hospital | 48 hours       | Nurses                        | Intensive care glycaemic control/diabetes                                               |
| Byrne, 2005             | USA            | CBA    | Nursing homes                                         | 33 months      | Nurses                        | Falls and pressure ulcer reduction (assessment and prevention)                          |
| Canbolat et al, 2019    | Turkey         | Non-RT | ICU university general hospital                       | 22 months      | Nurses [and physicians]       | ICU glycaemic control                                                                   |
| Cavalcanti et al, 2009  | Brazil         | RCT    | ICU general hospital                                  | 19 months      | Nurses                        | ICU glycaemic control                                                                   |
| Cleveringa et al, 2008  | Netherlands    | RCT    | Primary care practices                                | 1 year         | Nurses [and physicians]       | Management and prevention of diabetes (and CV risk factors)                             |
| Cleveringa et al, 2010  | Netherlands    | RCT    | Primary care practices                                | 1 year         | Nurses                        | Management and prevention of diabetes (and CV risk factors)                             |
| Cortez, 2014            | USA            | RCT    | Academic medical centre oncology clinics              | 11 weeks       | Nurses                        | Management of cancer symptoms                                                           |
| Dalaba 2015             | Ghana          | CBA    | Primary care health centres                           | 2 years        | Nurses                        | Maternal care                                                                           |
| Dowding et al, 2012     | USA            | ITS    | General hospitals                                     | 6 years        | Nurses                        | Risk assessment, falls and pressure ulcer prevention                                    |
| Duclos et al, 2015      | France         | RCT    | Paediatric wards in a university hospital             | 2 years        | Dieticians                    | Nutritional care in malnourished children                                               |
| Dumont et al, 2012      | USA            | RCT    | ICU wards in a regional referral hospital             | 4 months       | Nurses                        | Glycaemic control                                                                       |
| Dykes et al, 2009       | USA            | RCT    | Urban hospitals                                       | 6 months       | Nurses                        | Fall prevention                                                                         |
| Dykes et al, 2020       | USA            | ITS    | Academic medical centres                              | 42 months      | Nurses                        | Fall prevention                                                                         |
| Fitzmaurice et al, 2000 | UK             | RCT    | primary care/general practice                         | 1 year         | Nurses                        | oral anticoagulation care                                                               |
| Forberg et al, 2016     | Sweden         | RCT    | paediatric university hospital                        | 3 months       | Nurses                        | management of peripheral venous catheters in paediatrics                                |
| Fossum et al, 2011      | Norway         | CBA    | Nursing homes                                         | 2 years        | Nurses                        | Preventative behaviours and management of nutrition                                     |

|    |                      |                                     |     |                                           |           |                             |                                                           |
|----|----------------------|-------------------------------------|-----|-------------------------------------------|-----------|-----------------------------|-----------------------------------------------------------|
| 1  |                      |                                     |     |                                           |           |                             |                                                           |
| 2  |                      |                                     |     |                                           |           |                             |                                                           |
| 3  | Geurts et al, 2017   | Netherlands                         | RCT | University paediatric hospital            | 2 years   | Nurses                      | Management of (re)hydration in children                   |
| 4  | Hovorka et al, 2007  | Czech Republic                      | RCT | Cardiac Surgery, University Hospital      | 48 hours  | Nurses                      | Glycaemic control                                         |
| 5  |                      |                                     |     |                                           |           |                             |                                                           |
| 6  | Kroth et al, 2006    | USA                                 | RCT | University Hospital                       | 9 months  | Nurses                      | Body temperature assessment                               |
| 7  | Lattimer et al, 1998 | UK                                  | RCT | Primary care practices                    | 1 year    | Nurses & physicians         | Emergency call assessment                                 |
| 8  |                      |                                     |     |                                           |           |                             |                                                           |
| 9  | Lattimer et al, 2000 | UK                                  | RCT | Primary care practices                    | 1 year    | Nurses & physicians         | Cost analysis of emergency call assessments               |
| 10 |                      |                                     |     |                                           |           |                             |                                                           |
| 11 | Lee et al, 2009      | USA                                 | RCT | School of Nursing (University)            | 8 months  | Nurses                      | Obesity management                                        |
| 12 | Lv et al, 2019       | China                               | RCT | Community healthcare centres              | 1 year    | Nurses                      | Chronic asthma management                                 |
| 13 |                      |                                     |     |                                           |           |                             |                                                           |
| 14 | Mann et al, 2011     | USA                                 | RCT | Surgical Military hospital ICU            | 6 days    | Nurses                      | Glycaemic control in burn intensive care patients         |
| 15 | McDonald et al, 2017 | USA                                 | RCT | Nursing care homes                        | 2 months  | Nurses                      | Management of chronic medical condition                   |
| 16 |                      |                                     |     |                                           |           |                             |                                                           |
| 17 | Paulson et al, 2020  | Norway                              | RCT | University hospital                       | 10 months | Nurses                      | Management of malnutrition                                |
| 18 |                      |                                     |     |                                           |           |                             |                                                           |
| 19 | Plank et al, 2006    | Mixed (Austria, Czech Republic, UK) | RCT | University hospitals                      | 48 hours  | Nurses                      | Glycaemic control                                         |
| 20 |                      |                                     |     |                                           |           |                             |                                                           |
| 21 |                      |                                     |     |                                           |           |                             |                                                           |
| 22 |                      |                                     |     |                                           |           |                             |                                                           |
| 23 |                      |                                     |     |                                           |           |                             |                                                           |
| 24 | Rood et al, 2005     | Netherlands                         | RCT | Surgical ICU in a teaching hospital       | 10 weeks  | Nurses                      | Glycaemic control                                         |
| 25 |                      |                                     |     |                                           |           |                             |                                                           |
| 26 | Roukema et al, 2008  | Netherlands                         | RCT | Children's Hospital                       | 27 months | Nurses                      | Management of children with fever without apparent source |
| 27 |                      |                                     |     |                                           |           |                             |                                                           |
| 28 | Sassen et al, 2014   | Netherlands                         | RCT | University research centre                | 17 months | Nurses and physios          | professionals' behaviour                                  |
| 29 | Snooks et al, 2014   | UK                                  | RCT | Emergency ambulance services              | 1 year    | Paramedics                  | Assessment and management of falls                        |
| 30 | Vadher et al, 1997   | UK                                  | RCT | Cardiovascular medicine, general hospital |           | A nurse and Trainee doctors | oral anticoagulant control                                |
| 31 |                      |                                     |     |                                           |           |                             |                                                           |
| 32 | Wells, 2013          | UK                                  | RCT | Emergency ambulance services              | 1 year    | Paramedics                  | Emergency fall assessment and management                  |
| 33 |                      |                                     |     |                                           |           |                             |                                                           |

**Note:** CBA, controlled before and after; CDSS, computerised decision support; HPs, health professionals; ITS, interrupted time-series; RCT, randomised controlled trials

## Effects of intervention

Most studies reported more than two outcomes from a total of 124 individual outcomes reported (115 distinct types of measured outcomes). There were five distinct outcome groups: 1) care process, 2) care outcomes, 3) health professionals' knowledge, beliefs, and behaviours, 4) adverse events, and 5) economic costs and consequences.

### Care process

CDSS was better than usual care for 16 of 34 (47%) care process outcomes. Care delivery was worse (n=5, 14.7%) or no different for 13 (38.2%) processes. See Supplementary Table 3.

### *Adherence to guidelines*

The four RCTs reporting nurses' adherence to guidelines examined 10 outcomes.<sup>32 34 45 49</sup> Only one trial reported baseline and follow-up data for both arms,<sup>34</sup> CDSS users had better adherence to hand disinfection guidelines (risk difference=6.7%; 95% CI: 4.9 to 8.5%); but were less likely to follow guidelines on disposable glove use (risk difference= -1.4%; 95% CI: -2.2 to -0.5%) and daily inspections of Peripheral Venous Catheters (risk difference=-5.2%; 95% CI: -7.2 to -3.3%).

Two trials<sup>32 45</sup> showed nurses using CDSS had better insulin dosing (risk difference=22%; 95% CI: 19 to 25%) and on-time blood sampling (risk difference=4.7%; 95% CI: 2.0 to 7.4%) guideline compliance. They deviated less from protocols (mean score difference out of 10 =-2.6; 95% CI: -4.5 to -0.71) and concurred more with recommended insulin doses (than trainee doctors).<sup>49</sup>

### *Patient assessment, diagnosis, and treatment practices*

Five RCTs<sup>31 36 38 46 50</sup> and one ITS<sup>21</sup> reported 18 indicators of patient assessment and treatment quality. Pain assessment quality (pain score use and appropriateness of choices) of emergency department patients improved by 62.7% (95% CI: 59.6 to 65.8%) and investigation of in-patient paediatric malnutrition aetiology was 21.2% higher (95% CI: 15.9 to 26.5%) with CDSS. However, optimal IV antibiotics administration for sepsis was lower reduced by 5.9% (95% CI: -8.3 to -3.5). Laboratory tests

(electrolytes level acid-base balance test) and nutrition supplements (oral Rehydration Solution and IV rehydration) were no more likely to be ordered for paediatric inpatients by CDSS-enabled nurses.

There were marginally fewer wrongly recorded temperatures in hospital inpatients amongst CDSS-enabled nurses (risk difference= -0.8%, 95% CI: -0.9 to -0.6). Vital signs recording in patients attended by paramedics were also not significantly different.

#### *Documenting care*

One ITS and a randomised trial reported five documentation-focused indicators.<sup>30 52</sup> Falls (risk ratio=1.4, 95% CI: 0.03 to 73.7) and hospital acquired pressure ulcer risk assessments (risk ratio=9.1, 95% CI: 1.95 to 42.5) were higher with CDSS. As was nutritional care planning, food and fluid intake recording and treatment by nurses.<sup>52</sup>

#### *Referrals*

Paramedics using CDSS were more likely to refer patients to a community falls than send them to the ER (risk difference=4.7%, 95% CI: 1.1. to 8.3).<sup>48</sup>

#### **Patient care outcomes**

CDSS improved patient care outcomes in 22 of 54 (40.7%) indicators and worsened them for 1 outcome indicator (2%). See Supplementary Table 4.

#### *Blood glucose control*

Six RCTs<sup>22 25 26 37 42 44</sup> and one non-randomised trial<sup>24</sup> reported 19 indicators of glycaemic control, but only two reported baseline *and* follow-up values<sup>22 26</sup>. Blood glucose levels were better managed by ICU nurses using CDSS (mean=-2.2, SD=1.12) compared to paper-based *Mathias* (mean=-1.2, SD=0.66) and *Bath* (mean=-1.5, SD=0.78) protocols.<sup>22</sup> Glycated haemoglobin (A1C) <7%, systolic blood pressure <140 and total cholesterol<4.5mmol/l were higher by 4.6% (95% CI: 2.7 to 6.5), 10.2% (95% CI: 7.9 to 12.5) and 3.7% (95% CI: 1.2 to 6.2) respectively in patients receiving care from CDSS-enabled nurses compared.

1  
2  
3 Trials reporting only follow-up data suggest better blood glucose control by CDSS-using nurses across  
4 a range of indicators: proportion in target range (risk difference=32.9%; 95% CI: 20 to 46%), occasions  
5 within the target glycaemic range (80-110 mg/dl) (risk difference= 33%, 95% CI: 20.5 to 45.4),  
6 occasions over the target glycaemic range (>110 mg/dl) (risk difference= -31%, 95% CI: -43.7 to -18.2),  
7 and improvement of glycaemic control for 48 hours (risk difference=40%, 95% CI: 27.4 to 52.6)

#### 14 15 *Blood coagulation management*

16 One RCT reported three indicators of blood coagulation management in primary care.<sup>33</sup> Nurses using  
17 CDSS had significantly more tests in range (risk difference=4%, 95% CI: 0.4 to 7.6) than doctors *without*  
18 CDSS. However, the improvement from baseline was lower amongst nurses (risk difference=-1.9%  
19 (95% CI: -3.1 to -0.7), 'International Normalised Ratio (INR) Results within Range Point Prevalence'  
20 were not significantly different between the two groups and again, nurses using CDSS improved less  
21 than physicians without CDSS (risk difference=-2.6%, 95% CI: -5.3 to -0.1). There was no significant  
22 difference between groups in 'Time Spent within INR Target Range' (risk difference=7%, 95% CI: -0.7  
23 to 14.7).

#### 34 35 *Antenatal and peripartum care*

36 The CBA study examining antenatal and peripartum care in community settings<sup>29</sup> suggested CDSS-using  
37 midwives reduced delivery complications (per 1000 attendances) compared to usual care (risk  
38 difference=2.4%, 95% CI: 1.1 to 3.7).

#### 43 44 *Managing patients with chronic co-morbid diseases*

45 Two RCTs examined three indicators of successfully managing patients with complex chronic multi-  
46 morbid health conditions in care homes,<sup>43</sup> and with asthma<sup>53</sup> showed no significant differences  
47 between CDSS users and non-users for emergency room usage, hospitalisation and complexity of  
48 medication regimens.

#### 54 55 *Obesity screening*



1  
2  
3 The RCT examining outpatient obesity screening by trainee nurses found CDSS-users had more  
4  
5 'encounters with obesity-related diagnosis' (risk difference=10.3%, 95% CI: 8.0 to 12.5) and fewer  
6  
7 'encounters with missed obesity-related missed diagnosis' (risk difference=41%, 95% CI: 48.8 to 35.0)  
8  
9  
10 than trainee nurses without CDSS.<sup>41</sup>

### 11 12 *Fall and pressure ulcer prevention and management*

13  
14 Two RCTs,<sup>20 51</sup> two CBA studies<sup>23 35</sup> and two ITS<sup>30 54</sup> focused on fall or pressure ulcer prevention and  
15  
16 management. In a single trial,<sup>20</sup> pressure ulceration prevalence decreased more during the CDSS-  
17  
18 enabled follow-up period (risk difference=-6.3%, 95% CI: -10.2 to -2.4). A result reversed in one of the  
19  
20 CBA studies (risk difference=4.2%, 95% CI: 0.2 to 8.2).<sup>35</sup> The other CBA studies revealed no significant  
21  
22 differences between CDSS using and non-using nurses trying to prevent falls and pressure ulcers.<sup>23</sup> In  
23  
24 the ITS study, fall rate (risk ratio=0.91, 95% CI: 0.75 to 1.12) and hospital acquired pressure ulcer  
25  
26 occurrence (risk ratio=0.47, 95% CI: 0.25 to 0.85) were significantly lower with CDSS.<sup>30</sup>

### 27 28 29 30 31 *Triage*

32  
33 Three RCTs<sup>39 40 48</sup> and one ITS study<sup>21</sup> evaluated CDSS impact on triage judgements. Health  
34  
35 professionals using CDSS made fewer calls to General Practitioners (GP) for telephone advice (risk  
36  
37 difference= -34.2%, 95% CI: -36 to -33), had fewer patients visited at home by duty GPs (risk  
38  
39 difference=-5.5%, 95% CI: -6.9 to -4.2), and fewer hospital admissions within 3 days (risk  
40  
41 difference=-0.98%, 95% CI: -1.8 to -0.2) of the judgement. There were no differences in, 'patients left  
42  
43 at scene without conveyance to emergency department' (risk difference= 5.2%, 95% CI: -1.7 to 12.1).  
44  
45  
46 The ITS study reported the proportion of *correct (sic)* triage prioritisation judgements was higher  
47  
48 amongst CDSS-users (risk difference=24.7%; 95% CI: 18.8 to 30.6).

### 49 50 51 *Quality of life and patients' satisfaction*

52  
53 Two RCTs examined CDSS impact on quality of life and patient satisfaction.<sup>27 48</sup> Patients in CDSS-using  
54  
55 groups gained more life years (average difference in years=0.14, 95% CI: -0.12 to 0.40), more healthy  
56  
57 years (average difference in years = 0.037, 95% CI: -0.066 to 0.14) but lower quality of life and  
58  
59 satisfaction. None of these differences were statistically significant.  
60

## Health professionals' knowledge, beliefs, and behaviour

CDSS effects on knowledge, beliefs, and behaviours of health professionals<sup>20 28 32 47</sup> was the focus of four RCTs using twelve indicators. CDSS increased 'Positive knowledge change' (risk difference=6.5%; 95% CI:0.8 to 13.2), 'positive attitude change' (risk difference=12.7%, 95% CI: 5.9 to 19.5), 'research utilisation' (risk difference=9%; 95% CI: 3.3 to 14.7), nurses' satisfaction (difference in satisfaction out of 10=3.6, 95% CI: 2.4 to 4.8), and perceived deviations from protocols (mean difference out of 10=-4.7, 95% CI: -6.1 to -3.3). Conversely, there was no significant impact on behaviours, intentions, perceived behavioural control, subjective and moral norms, barriers, and research utilisation of CDSS-using nurses and physiotherapists (Supplementary Table 5).

## Adverse events

CDSS are not risk free, and three RCTs<sup>27 33 48</sup> used four indicators to examine adverse events. Cardiovascular events in patients with diabetes (risk difference=-11%, 95% CI: -18 to -4) and deaths in primary care patients (risk difference=-5.7%, 95% CI: -10.1 to -1.7) were lower in CDSS-using groups of professionals. Serious adverse reactions in primary care patients and deaths in patients recently fallen and attended by paramedics were no less likely (Supplementary Table 6).

## Economic costs and consequences

Four RCTs<sup>27 36 40 48</sup> used 20 indicators to report economic costs and consequences of CDSS. Costs of managing cardiovascular disease were lower in CDSS users (cost difference=-€587, 95% CI: -880 to -294). Diabetes care cost more (cost difference=€326, 95% CI: 315 to 318); took longer per care task ('mean length of job cycle time' difference in minutes=8.9; 95% CI: 2.3 to 15.3) to generate an additional quality adjusted life-year (QALY) costing €38,243.00 (Supplementary Table 7).

## DISCUSSION

### Summary of main results

Our systematic review suggests CDSS can improve nurses' and AHPs' performance and care outcomes. Thirty eight percent (38%) of indicators were better. Of 35 included studies, 26 (74.3%) reported CDSS-influenced care as better than care without CDSS on at least one outcome. In contrast, 8 studies

1  
2  
3 (22.8%) showed no impact of CDSS on care, with 7 studies suggesting CDSS were less effective than  
4  
5 usual care for at least one outcome.  
6  
7

#### 8 *Care process*

9  
10 Processes of care were positively influenced by CDSS in almost half the studies: 16 of 34 (47%) a  
11  
12 headline that masks a very wide range of absolute improvement: from 0.7% to 62.7%. Hand  
13  
14 disinfection protocol adherence, insulin dosing, blood sampling at the right time, and documented  
15  
16 care were all better in CDSS users. This should be contrasted with the five (16.1%) outcomes where  
17  
18 CDSS provided no advantages over usual care. Both sets of findings are mitigated further by the  
19  
20 considerable uncertainty in trying to estimate a holistic picture: the effects in 13 care process  
21  
22 indicators (41.9%) were not estimable; either because studies lacked power (lower than minimum  
23  
24 acceptable of 80%) to detect a difference in the comparison groups, or appropriate confidence  
25  
26 intervals were not reported or could not be calculated from information published.  
27  
28  
29

#### 30 *Patient care outcomes*

31  
32 CDSS significantly improved patient care outcomes across a broad range of 22 of 54 (40.7%) indicators  
33  
34 (absolute improvement between 4.6% and 42.9%). Just one indicator (1.8%) suggested no  
35  
36 improvement. Nurses using CDSS better controlled blood glucose in emergency care patients (in five  
37  
38 out of seven studies involved) and nurses and physiotherapists using CDSS better managed fall risk  
39  
40 and pressure ulcer management. Triage was improved in nurses using CDSS in emergency call centres  
41  
42 and paramedics faced with "emergency falls" in older patients.  
43  
44  
45

#### 46 *Health professionals' knowledge, beliefs, and behaviour*

47  
48 Improved knowledge, beliefs, and behaviour occurred in three of 12 indicators (25%). Nurse and  
49  
50 physiotherapist CDSS-users had more knowledge and better attitudes compared to non-users.  
51  
52 CDSS-enabled nurses utilised more research, were more satisfied at work, and perceived a greater  
53  
54 need to follow protocols than non-users.  
55  
56

#### 57 *Adverse events*

1  
2  
3 CDSS generated fewer adverse events across two of four indicators (50%). CDSS-using nurses had  
4 fewer cardiovascular events and reported deaths in their primary care patients compare to similar  
5 patients seen by doctors not using CDSS.  
6  
7  
8

### 9 10 *Economic costs and consequences*

11  
12  
13 CDSS did not significantly increase costs or produce savings. Costs per quality adjusted life-year (QALY)  
14 was €38,243.00 in one study –higher than the widely accepted willingness-to-pay threshold of €20,000  
15 per QALY<sup>27</sup> and the United Kingdom *de facto* threshold of £30,000 per QALY to be considered cost-  
16 effective by the National Institute for Health and Care Excellence.<sup>55</sup>  
17  
18  
19  
20  
21

### 22 23 **Comparison with other studies or reviews**

24  
25 Only one previous review has examined the effects of CDSS on nursing performance and patient  
26 outcomes.<sup>11</sup> Twenty new primary studies have been published since this review; but inconsistent  
27 outcomes and weaknesses in study designs and methods remain. Of note is the absence of a  
28 theoretical foundation for the implementation of CDSS in many studies and the absence of guidelines  
29 for designing, conducting/evaluating, and reporting CDSS-use by nurses/AHPs. Of 32 included studies,  
30 just one used an explicit implementation model/theory at design stage.<sup>20</sup> None of the studies  
31 discussed their findings with reference to implementation science/theory.  
32  
33  
34  
35  
36  
37  
38  
39  
40

41 In their review of 100 trials – principally with doctors - Garg et al.<sup>7</sup> reported improved performance in  
42 64% and better patient outcomes in 13% of studies. Our results suggest greater improvement may be  
43 possible for nursing work in particular (47% of process indicators and 41% of outcomes). Garg et al.<sup>7</sup>  
44 transformed improvement into a binary (yes/no) indicator and did not quantify the outcome  
45 improvements – making the clinical significance of improvements hard to ascertain.  
46  
47  
48  
49  
50  
51

52  
53 Bright et al. <sup>8</sup> reviewed RCTs of CDSS with a range of health professional decision makers (doctors,  
54 nurses and AHPs). They reported improvements in processes of care (OR=1.55, 95% CI: 1.38 to 1.74)  
55 and morbidity (RR=0.88, 95% CI: 0.80 to 0.96), but no impact on mortality (OR=0.79, 95% CI: 0.54 to  
56 1.15) or safety/adverse events (RR= 1.01, 95% CI: 0.90 to 1.14). However, outcomes measured were  
57  
58  
59  
60

1  
2  
3 too heterogeneous for meta-analysis. The criteria for comparison groups was relaxed; the  
4  
5 “intervention” sometimes included paper-based decision support and alternative CDSS systems were  
6  
7 used as a comparator in some studies. Our review required there to be an indication for the use of  
8  
9 CDSS and a comparator that ruled out CDSS-use as part of “usual care”. Whilst we found  
10  
11 improvements are *possible* from CDSS, comparison with Bright et al’s findings would be unreliable.  
12  
13

14  
15 Moja and colleagues’ review of 18 RCTs <sup>10</sup> (including nurses and AHPs alongside doctors) found no  
16  
17 significant difference in CDSS-attributable mortality (RR=0.96, 95% CI: 0.85 to 1.08) but lower  
18  
19 morbidity (RR=0.82, 95% CI: 0.68 to 0.99). Whilst mortality and morbidity findings are similar to ours,  
20  
21 their use of CDSS in the primary study comparator groups, again makes comparisons unreliable.  
22  
23

24  
25 A recent review of 115 trials of CDSS, with a mix of health professionals, reported process  
26  
27 improvements of the order of 5.8% (95% CI: 4.0% to 7.6%) with CDSS.<sup>9</sup> As with Bright et al. the  
28  
29 ‘comparator’ criteria were unclear and outcome measures too heterogeneous for meta-analysis.  
30  
31 Studies with more than two comparators were treated as different trials, meaning double counting  
32  
33 and multiple comparisons (p-hacking) could not be ruled out, confounding comparisons with our  
34  
35 findings.  
36  
37

### 38 39 **Strength and limitations**

40  
41 Our review, whilst based on a comprehensive literature search, is a function of that literature.  
42  
43 Consequently, we have primarily highlighted CDSS impact on nurses rather than AHPs. With the  
44  
45 exception of paramedics and physiotherapists, other AHPs are poorly represented.  
46  
47

48  
49 Evidence quality was poor and has not improved significantly since the late noughties. Whilst the  
50  
51 number of studies (35), service users/patients (~67,000) and health professionals (~1,318) involved  
52  
53 was sizable, outcomes were too heterogeneous for aggregation. Inconsistencies in the effects of CDSS  
54  
55 on target health professionals’ performance and patient outcomes remains unresolved.  
56  
57

### 58 59 **Conclusions**

60

1  
2  
3 CDSS can benefit nurse and (some) AHP delivered performance and patient outcomes. CDSS can  
4  
5 improve adherence to guidelines and enhance patient care. Triaging of emergency patients, glycaemic  
6  
7 control, and screening of malnutrition and obesity all represent appropriate targets for CDSS. These  
8  
9 conclusions require cautious interpretation: they are based on mainly low-quality studies, with  
10  
11 heterogeneous outcomes and indicators.  
12

13  
14  
15 To improve the quality of studies and consistency of outcomes, future research should satisfy two key  
16  
17 requirements. First, system designers and evaluators should consider appropriate implementation  
18  
19 theory/models given the planned technology and associated work. Second, study reporting is varied,  
20  
21 poor quality and lacking essential detail for implementation; guidelines for conducting and reporting  
22  
23 CDSS should be a feature of the publication of findings. This would make synthesis easier and more  
24  
25 informative. Guidelines for CDSS reporting in general already exist, it is difficult to conceive why they  
26  
27 cannot be applied to nursing and AHP-focused CDSS.<sup>56 57</sup>  
28  
29  
30  
31  
32

33 **FUNDING:** The review is funded by the National Institute for Health Research Health Services  
34  
35 Delivery and Research programme [award number: NIHR127926]. The views expressed in this  
36  
37 publication are those of the authors and not necessarily those of the NHS, the NIHR or the  
38  
39 Department of Health.  
40  
41  
42

43 **PATIENT AND PUBLIC INVOLVEMENT:** The initial impetus for the bid came from discussions with  
44  
45 Governors and service user representatives from Leeds Partnership NHS Foundation Trust. CT was a  
46  
47 Non-Executive Director involved with the introduction of technology to help assessment by  
48  
49 community mental health nurses. Because end-users of the review will be professionals and  
50  
51 commissioners as well as patients and the public, we have set up an advisory group composed of  
52  
53 people with specialist knowledge of digital health in a UK NHS context. One of our co-authors, Alison  
54  
55 Ledward, is a public member of the UK NIHR HS&DR Researcher-Led Panel and has helped to shape  
56  
57 our protocol. She has helped to ensure we maintain our focus on the effects of CDSS on patient  
58  
59  
60

1  
2  
3 outcomes and experiences and determining whether CDSS help nurses and AHPs make better  
4  
5 decisions for patients.  
6  
7

8 **AUTHOR CONTRIBUTIONS:** AK, AL, CT, DA, HY, KB and RR contributed to conception of the review.  
9

10 DA conducted online database searches. AK, CT, HK, HY, RR, SS and TM contributed to titles and  
11  
12 abstracts screening. CT and TM contributed to full text screening, quality assessment and data  
13  
14 extraction. TM analysed and summarised data as well as produced the first draft of the manuscript.  
15

16  
17 All authors have been involved in revising the work for important intellectual content and have  
18  
19 approved the final version for publication.  
20  
21

22  
23  
24 **COMPETING INTERESTS:** None declared  
25  
26

27  
28 **PATIENTS CONSENT FOR PUBLICATION:** Not required  
29  
30

31  
32 **ETHICS APPROVAL:** Not required  
33  
34  
35  
36  
37  
38  
39  
40  
41  
42  
43  
44  
45  
46  
47  
48  
49  
50  
51  
52  
53  
54  
55  
56  
57  
58  
59  
60

## REFERENCES

1. Murdoch J, Barnes R, Pooler J, et al. The impact of using computer decision-support software in primary care nurse-led telephone triage: interactional dilemmas and conversational consequences. *Social Science & Medicine* 2015;126:36-47.
2. Anderson JA, Willson P. Clinical Decision Support Systems in Nursing: Synthesis of the Science for Evidence-Based Practice. 2008;26(3):151-58. doi: 10.1097/01.NCN.0000304783.72811.8e
3. Cresswell K, Majeed A, Bates DW, et al. Computerised decision support systems for healthcare professionals: an interpretative review. *Informatics in primary care* 2012;20(2):115-28. [published Online First: 2012/01/01]
4. Bonney W. Impacts and risks of adopting clinical decision support systems. *Efficient Decision Support Systems: Practice and Challenges in Biomedical Related Domain* 2011:21-30.
5. Langhorne P, Ramachandra S. Organised inpatient (stroke unit) care for stroke: network meta-analysis. *Cochrane Database of Systematic Reviews* 2020(4) doi: 10.1002/14651858.CD000197.pub4
6. Sintchenko V, Coiera E. Decision complexity affects the extent and type of decision support use. *AMIA Annual Symposium proceedings AMIA Symposium* 2006;2006:724-28.
7. Garg AX, Adhikari NKJ, McDonald H, et al. Effects of Computerized Clinical Decision Support Systems on Practitioner Performance and Patient Outcomes A Systematic Review. *JAMA* 2005;293(10):1223-38. doi: 10.1001/jama.293.10.1223 %J JAMA
8. Bright TJ, Wong A, Dhurjati R, et al. Effect of Clinical Decision-Support Systems: A Systematic Review. *Annals of Internal Medicine* 2012;157(1):29-43. doi: 10.7326/0003-4819-157-1-201207030-00450 %J Annals of Internal Medicine
9. Kwan JL, Lo L, Ferguson J, et al. Computerised clinical decision support systems and absolute improvements in care: meta-analysis of controlled clinical trials. *bmj* 2020;370
10. Moja L, Kwag KH, Lytras T, et al. Effectiveness of computerized decision support systems linked to electronic health records: a systematic review and meta-analysis. *Am J Public Health* 2014;104(12):e12-22. doi: 10.2105/AJPH.2014.302164 [published Online First: 2014/10/17]
11. Randell R, Mitchell N, Dowding D, et al. Effects of computerized decision support systems on nursing performance and patient outcomes: a systematic review. *Journal of Health Services Research & Policy* 2007;12(4):242-51. doi: 10.1258/135581907782101543
12. Centre for Reviews and Dissemination. Systematic Reviews: CRD's Guidance for Undertaking Reviews in Health Care. . York: Centre for Reviews and Dissemination: University of York 2009.
13. Liberati A, Altman DG, Tetzlaff J, et al. The PRISMA statement for reporting systematic reviews and meta-analyses of studies that evaluate health care interventions: explanation and elaboration. *Annals of internal medicine* 2009;151(4):W-65-W-94.
14. Thompson C, Randell R, Keenan AM, et al. Effects of computerised clinical decision support systems (CDSS) on nursing and allied health professional performance and patient outcomes: a systematic review and user contextualisation.: PROSPERO; 2019 [cited background. Available from: [https://www.crd.york.ac.uk/prospero/display\\_record.php?ID=CRD42019147773](https://www.crd.york.ac.uk/prospero/display_record.php?ID=CRD42019147773).
15. Cochrane Effective Practice Organisation of Care (EPOC). EPOC Resources for review authors: What study designs can be considered for inclusion in an EPOC review and what should that be called? 2017 [cited background. Available from: <http://epoc.cochrane.org/resources/epoc-resources-review-authors> accessed April 15, 2020.
16. Cochrane Effective Practice and Organisation of Care (EPOC). Data collection form. EPOC resources for review authors 2017 [cited background. Available from: <https://epoc.cochrane.org/resources/epoc-resources-review-authors> accessed March 30,2020.



17. Higgins JPT TJ, Chandler J, Cumpston M, Li T, Page MJ, Welch VA (editors). Cochrane Handbook for Systematic Reviews of Interventions version 6.0 (updated July 2019): Cochrane 2019.
18. Cochrane Effective Practice and Organisation of Care (EPOC). Suggested risk of bias criteria for EPOC reviews. EPOC resources for review authors 2017 [cited background. Available from: <https://epoc.cochrane.org/resources/epoc-resources-review-authors>.
19. Borenstein M, Hedges L, Higgins J, et al. When does it make sense to perform a meta-analysis? Introduction to Meta-Analysis. Chester, UK: John Wiley & Sons Ltd 2009.
20. Beeckman D, Clays E, Van Hecke A, et al. A multi-faceted tailored strategy to implement an electronic clinical decision support system for pressure ulcer prevention in nursing homes: a two-armed randomized controlled trial. *Int J Nurs Stud* 2013;50(4):475-86. doi: <https://dx.doi.org/10.1016/j.ijnurstu.2012.09.007>
21. Bennett P, Hardiker N. A Quantitative Study Investigating the Effects of Computerised Clinical Decision Support in the Emergency Department. *Studies in health technology and informatics* 2016;225:53-57.
22. Blaha J, Kopecky P, Matias M, et al. Comparison of Three Protocols for Tight Glycemic Control in Cardiac Surgery Patients. *Diabetes Care* 2009;32(5):757. doi: 10.2337/dc08-1851
23. Byrne CM. Impact of prospective computerized clinical decision support information and targeted assistance on nursing home resident outcomes. State University of New York at Albany, 2005.
24. Canbolat O, Kapucu S, Kilickaya O. Comparison of Routine and Computer-Guided Glucose Management for Glycemic Control in Critically Ill Patients. *Critical Care Nurse* 2019;39(4):20-27. doi: 10.4037/ccn2019431
25. Cavalcanti AB, Silva E, Pereira AJ, et al. A randomized controlled trial comparing a computer-assisted insulin infusion protocol with a strict and a conventional protocol for glucose control in critically ill patients. *Journal of Critical Care* 2009;24(3):371-78. doi: <https://doi.org/10.1016/j.jcrc.2009.05.005>
26. Cleveringa FGW, Gorter KJ, Van Donk MD, et al. Combined task delegation, computerized decision support, and feedback improve cardiovascular risk for type 2 diabetic patients. *Diabetes Care* 2008;31(12):2273-75.
27. Cleveringa FGW, Welsing PMJ, Van Den Donk M, et al. Cost-effectiveness of the diabetes care protocol, a multifaceted computerized decision support diabetes management intervention that reduces cardiovascular risk. *Diabetes Care* 2010;33(2):258-63.
28. Cortez S. Measuring active clinical decision support influence on nursing research utilization. University of Phoenix, 2014.
29. Dalaba MA, Akweongo P, Aborigo RA, et al. Cost-effectiveness of clinical decision support system in improving maternal health care in Ghana. *PLoS ONE* 2015;10(5):e0125920. doi: <https://dx.doi.org/10.1371/journal.pone.0125920>
30. Dowding DW, Turley M, Garrido T. The impact of an electronic health record on nurse sensitive patient outcomes: an interrupted time series analysis. *J Am Med Inform Assoc* 2012;19(4):615-20. doi: <https://dx.doi.org/10.1136/amiajnl-2011-000504>
31. Duclos A, Touzet S, Restier L, et al. Implementation of a computerized system in pediatric wards to improve nutritional care: a cluster randomized trial. *European journal of clinical nutrition* 2015;69(7):769-75. doi: 10.1038/ejcn.2014.288
32. Dumont C, Bourguignon C. Effect of a computerized insulin dose calculator on the process of glycemic control. *Am J Crit Care* 2012;21(2):106-15. doi: <https://dx.doi.org/10.4037/ajcc2012956>
33. Fitzmaurice DA, Hobbs FD, Murray ET, et al. Oral anticoagulation management in primary care with the use of computerized decision support and near-patient testing: a randomized, controlled trial. *Archives of Internal Medicine* 2000;160(15):2343-8.

- 1
- 2
- 3
- 4 34. Forberg U, Unbeck M, Wallin L, et al. Effects of computer reminders on complications of
- 5 peripheral venous catheters and nurses' adherence to a guideline in paediatric care—a cluster
- 6 randomised study. *Implementation Science* 2016;11 doi: 10.1186/s13012-016-0375-9
- 7
- 8 35. Fossum M, Alexander GL, Ehnfors M, et al. Effects of a computerized decision support system on
- 9 pressure ulcers and malnutrition in nursing homes for the elderly. *Int J Med Inf*
- 10 2011;80(9):607-17. doi: <https://dx.doi.org/10.1016/j.ijmedinf.2011.06.009>
- 11
- 12 36. Geurts D, de Vos-Kerkhof E, Polinder S, et al. Implementation of clinical decision support in
- 13 young children with acute gastroenteritis: a randomized controlled trial at the emergency
- 14 department. *European Journal of Pediatrics* 2017;176(2):173-81.
- 15
- 16 37. Hovorka R, Kremen J, Blaha J, et al. Blood Glucose Control by a Model Predictive Control
- 17 Algorithm with Variable Sampling Rate Versus a Routine Glucose Management Protocol in
- 18 Cardiac Surgery Patients: A Randomized Controlled Trial. *The Journal of Clinical*
- 19 *Endocrinology & Metabolism* 2007;92(8):2960-64. doi: 10.1210/jc.2007-0434
- 20
- 21 38. Kroth PJ, Dexter PR, Overhage JM, et al. A computerized decision support system improves the
- 22 accuracy of temperature capture from nursing personnel at the bedside. *Amia Annual*
- 23 *symposium proceedings AMIA symposium* 2006:444-48.
- 24
- 25 39. Lattimer V, George S, Thompson F, et al. Safety and effectiveness of nurse telephone
- 26 consultation in out of hours primary care: Randomised controlled trial. *British Medical*
- 27 *Journal* 1998;317(7165):1054-59.
- 28
- 29 40. Lattimer V, Sassi F, George S, et al. Cost analysis of nurse telephone consultation in out of hours
- 30 primary care: evidence from a randomised controlled trial. *BMJ* 2000;320(7241):1053-7.
- 31
- 32 41. Lee NJ, Chen ES, Currie LM, et al. The effect of a mobile clinical decision support system on the
- 33 diagnosis of obesity and overweight in acute and primary care encounters. *ANS Adv Nurs Sci*
- 34 2009;32(3):211-21. doi: <https://dx.doi.org/10.1097/ANS.0b013e3181b0d6bf>
- 35
- 36 42. Mann EA, Jones JA, Wolf SE, et al. Computer decision support software safely improves glycemic
- 37 control in the burn intensive care unit: A randomized controlled clinical study. *Journal of*
- 38 *Burn Care and Research* 2011;32(2):246-55.
- 39
- 40 43. McDonald MV, Feldman PH, Barron-Vaya Y, et al. Outcomes of clinical decision support (CDS)
- 41 and correlates of CDS use for home care patients with high medication regimen complexity:
- 42 a randomized trial. *Journal of Evaluation in Clinical Practice* 2017;22(1):10-19.
- 43
- 44 44. Plank J, Blaha J, Cordingley J, et al. Multicentric, Randomized, Controlled Trial to Evaluate Blood
- 45 Glucose Control by the Model Predictive Control Algorithm Versus Routine Glucose
- 46 Management Protocols in Intensive Care Unit Patients. *Diabetes Care* 2006;29(2):271. doi:
- 47 10.2337/diacare.29.02.06.dc05-1689
- 48
- 49 45. Rood E, Bosman RJ, van der Spoel JI, et al. Use of a Computerized Guideline for Glucose
- 50 Regulation in the Intensive Care Unit Improved Both Guideline Adherence and Glucose
- 51 Regulation. *Journal of the American Medical Informatics Association* 2005;12(2):172-80. doi:
- 52 10.1197/jamia.M1598
- 53
- 54 46. Roukema J, Steyerberg EW, van der Lei J, et al. Randomized trial of a clinical decision support
- 55 system: impact on the management of children with fever without apparent source. *Journal*
- 56 *of the american medical informatics association : JAMIA* 2008;15(1):107-13. doi:
- 57 10.1197/jamia.M2164
- 58
- 59 47. Sassen B, Kok G, Schepers J, et al. Supporting health care professionals to improve the processes
- 60 of shared decision making and self-management in a web-based intervention: randomized
- controlled trial. *Journal of medical Internet research* 2014;16(10):e211.
48. Snooks HA, Carter B, Dale J, et al. Support and Assessment for Fall Emergency Referrals (SAFER
- 1): cluster randomised trial of computerised clinical decision support for paramedics. *PLoS*
- ONE* 2014;9(9):e106436. doi: <https://dx.doi.org/10.1371/journal.pone.0106436>
49. Vadher BD, Patterson DL, Leaning M. Comparison of oral anticoagulant control by a nurse-
- practitioner using a computer decision-support system with that by clinicians. *Clinical and*
- laboratory haematology* 1997;19(3):203-07.

- 1  
2  
3  
4  
5  
6  
7  
8  
9  
10  
11  
12  
13  
14  
15  
16  
17  
18  
19  
20  
21  
22  
23  
24  
25  
26  
27  
28  
29  
30  
31  
32  
33  
34  
35  
36  
37  
38  
39  
40  
41  
42  
43  
44  
45  
46  
47  
48  
49  
50  
51  
52  
53  
54  
55  
56  
57  
58  
59  
60
50. Wells B. Implementation of Computerised Clinical Decision Support (CCDS) in a Prehospital Setting: Processes of Adoption and Impact on Paramedic Role and Practice. Swansea University (United Kingdom), 2013.
51. Dykes PC, Carroll DL, Hurley A, et al. Fall prevention in acute care hospitals: a randomized trial. *Jama* 2010;304(17):1912-18.
52. Paulsen MM, Paur I, Gjestland J, et al. Effects of using the MyFood decision support system on hospitalized patients' nutritional status and treatment: A randomized controlled trial. *Clinical Nutrition* 2020;39(12):3607-17.
53. Lv S, Ye X, Wang Z, et al. A randomized controlled trial of a mobile application-assisted nurse-led model used to improve treatment outcomes in children with asthma. *Journal of advanced nursing* 2019;75(11):3058-67.
54. Dykes PC, Burns Z, Adelman J, et al. Evaluation of a patient-centered fall-prevention tool kit to reduce falls and injuries: a nonrandomized controlled trial. *JAMA network open* 2020;3(11):e2025889-e89.
55. National Institute for Health and Clinical Excellence (NICE). Guide to the methods of technology appraisal London2013 [Available from: <https://www.nice.org.uk/process/pmg9/chapter/the-appraisal-of-the-evidence-and-structured-decision-making> accessed November 18,2020.
56. Kawamoto K, McDonald CJ. Designing, conducting, and reporting clinical decision support studies: recommendations and call to action. *Annals of Internal Medicine* 2020;172(11\_Supplement):S101-S09. doi: <https://doi.org/10.7326/M19-0875>
57. National Health Services (NHS). Digital Health: NHSX launches assessment criteria for digital health tools 2020 [cited discussion. Available from: <https://www.digitalhealth.net/2020/10/nhsx-launches-assessment-criteria-for-digital-health-tools/> accessed October 29, 2020.

1  
2  
3 **SUPPLEMENTARY MATERIAL LIST**  
4  
5  
6  
7  
8

9 **Supplementary Table 1:** Ovid MEDLINE(R) ALL, 1946 to February 12, 2021 Search Strategy

10 **Supplementary Table 2:** Risk of Bias assessment justifications using Effective Practice  
11 Organisation of Care (EPOC)'s tool  
12

13 **Supplementary Table 3:** Summary of patient care process results  
14

15 **Supplementary Table 4** Summary of patient care outcomes results  
16

17 **Supplementary Table 5:** Summary of Health professionals' knowledge, beliefs and  
18 behaviour results  
19

20 **Supplementary Table 6:** Summary of adverse events results  
21

22 **Supplementary Table 7:** Summary of economic costs and consequences results  
23  
24  
25  
26  
27  
28  
29  
30  
31  
32  
33  
34  
35  
36  
37  
38  
39  
40  
41  
42  
43  
44  
45  
46  
47  
48  
49  
50  
51  
52  
53  
54  
55  
56  
57  
58  
59  
60

Supplementary Table 1: Ovid MEDLINE(R) ALL, 1946 to February 12, 2021 Search Strategy

-----

1 exp Decision Making/ (207895)

2 decision support techniques/ (20911)

3 (decision\* adj2 making).ti,ab,kf. (159754)

4 (decision\* adj2 support\*).ti,ab,kf. (24230)

5 (decision\* adj2 aid\*).ti,ab,kf. (6501)

6 or/1-5 (354546)

7 exp Computers/ (79322)

8 exp information systems/ (238259)

9 exp Informatics/ (537355)

10 Internet/ (74916)

11 Software/ (112580)

12 Cell Phone/ (8821)

13 Mobile Applications/ (6962)

14 exp Telemedicine/ (32559)

15 Medical Records Systems, Computerized/ (19076)

16 exp Electronic Health Records/ (21793)

17 computer\*.ti,ab,kf. (313610)

18 electronic\*.ti,ab,kf. (291368)

19 (internet or web or online or on-line).ti,ab,kf. (310071)

20 (software or computer program\*).ti,ab,kf. (193359)

21 (automate\* or automation).ti,ab,kf. (136436)

22 (pda or pdas).ti,ab,kf. (13229)

23 personal digital assistant\*.ti,ab,kf. (1012)

24 (app or apps).ti,ab,kf. (31717)

25 (application\* adj2 mobile\*).ti,ab,kf. (4834)

26 (iPad\* or iPhone\* or smartphone\* or smart phone\* or smart device\*  
or mobile phone or android phone\* or cellphone\* or cell  
phone\*).ti,ab,kf. (26450)

27 (tablet adj2 (pc or device\* or comput\*)).ti,ab,kf. (1603)

28 ((hand held or handheld) adj2 (pc or device\* or comput\*)).ti,ab,kf.  
(2669)

1  
2  
3 29 (telehealth or telecare or telemedicine or ehealth or  
4 mhealth).ti,ab,kf. (29130)  
5  
6 30 or/7-29 (1674343)  
7  
8 31 6 and 30 (66042)  
9  
10 32 exp Decision Making, Computer-Assisted/ (149528)  
11  
12 33 Decision Support Systems, Clinical/ (8302)  
13  
14 34 (computer assisted adj2 (decision\* or diagnos\* or therap\* or  
15 support or treatment? or management)).ti,ab,kf. (1545)  
16  
17 35 (computer aided adj2 (decision\* or diagnos\* or therap\* or support  
18 or treatment? or management)).ti,ab,kf. (3921)  
19  
20 36 (decision adj2 support adj2 (system\* or tool\*)).ti,ab,kf. (9917)  
21  
22 37 (decision making adj2 (system\* or tool\*)).ti,ab,kf. (2560)  
23  
24 38 Expert Systems/ (3420)  
25  
26 39 (expert adj2 system\*).ti,ab,kf. (3613)  
27  
28 40 Reminder Systems/ (3568)  
29  
30 41 ((computer\* or electronic\* or CDSS) adj2 (reminder\* or  
31 alert\*)).ti,ab,kf. (1210)  
32  
33 42 ((medication or medicine or treatment or therapy) adj2 (reminder\*  
34 or alert\*)).ti,ab,kf. (857)  
35  
36 43 reminder system\*.ti,ab,kf. (875)  
37  
38 44 Medical Order Entry Systems/ (2303)  
39  
40 45 ((computer\* or electronic\*) adj2 order entry).ti,ab,kf. (1874)  
41  
42 46 (computer adj2 decision support\*).ti,ab. (412)  
43  
44 47 CPOE.ti,ab,kf. (1139)  
45  
46 48 or/32-47 (177952)  
47  
48 49 31 or 48 [all computerised clinical decision support systems terms]  
49 (228840)  
50  
51 50 Allied Health Personnel/ (11925)  
52  
53 51 Allied Health Occupations/ (587)  
54  
55 52 Physical Therapist Assistants/ (16)  
56  
57 53 Physical Therapy Specialty/ (2889)  
58  
59 54 Speech-Language Pathology/ (3172)  
60  
61 55 Occupational Therapy/ (13482)  
62  
63 56 Nutritionists/ (1290)

1  
2  
3 57 dietetics/ (7837)  
4  
5 58 Anesthesiologists/ (1163)  
6  
7 59 podiatry/ (2273)  
8  
9 60 exp Osteopaths/ (321)  
10  
11 61 osteopathic physicians/ (321)  
12  
13 62 anesthesiologist\*.ti,ab,kf. (22810)  
14  
15 63 podiatrist\*.ti,ab,kf. (910)  
16  
17 64 prosthetist\*.ti,ab,kf. (397)  
18  
19 65 chiroprapist\*.ti,ab,kf. (132)  
20  
21 66 orthoptist\*.ti,ab,kf. (319)  
22  
23 67 orthotist\*.ti,ab,kf. (220)  
24  
25 68 osteopath\*.ti,ab,kf. (5983)  
26  
27 69 radiographer\*.ti,ab,kf. (1803)  
28  
29 70 art therapist\*.ti,ab,kf. (89)  
30  
31 71 drama therapist\*.ti,ab,kf. (3)  
32  
33 72 music therapist\*.ti,ab,kf. (368)  
34  
35 73 (allied adj2 health adj2 (profession\* or worker\* or personnel or  
36 occupation\* or staff)).ti,ab,kf. (3421)  
37  
38 74 ((physical or occupational or language or speech or physio\*) adj2  
39 therap\*).ti,ab,kf. (50227)  
40  
41 75 physiotherapist\*.ti,ab,kf. (8544)  
42  
43 76 dietetic\*.ti,ab,kf. (9828)  
44  
45 77 dietitian\*.ti,ab,kf. (6580)  
46  
47 78 nutritionist\*.ti,ab,kf. (3020)  
48  
49 79 Patient care team/ (66483)  
50  
51 80 ((multidisciplinary or multi-disciplinary or multiprofessional or  
52 multi-professional or interdisciplinary or interprofessional) adj2  
53 team\*).ti,ab,kf. (32126)  
54  
55 81 Emergency Medical Technicians/ (5756)  
56  
57 82 Emergency Medical Services/ (43736)  
58  
59 83 Ambulances/ (6210)  
60  
61 84 Air Ambulances/ (2874)  
62  
63 85 paramedic\*.ti,ab,kf. (8537)  
64  
65  
66  
67  
68  
69  
70  
71  
72  
73  
74  
75  
76  
77  
78  
79  
80  
81  
82  
83  
84  
85  
86  
87  
88  
89  
90  
91  
92  
93  
94  
95  
96  
97  
98  
99  
100



- 1  
2  
3 86 HEMS.ti,ab,kf. (767)  
4  
5 87 ems.ti,ab,kf. (13017)  
6  
7 88 emt.ti,ab,kf. (25232)  
8  
9 89 prehospital.ti,ab,kf. (13136)  
10  
11 90 pre-hospital.ti,ab,kf. (4836)  
12  
13 91 first responder\*.ti,ab,kf. (2449)  
14  
15 92 emergency medical technician\*.ti,ab,kf. (1168)  
16  
17 93 emergency services.ti,ab,kf. (4115)  
18  
19 94 ambulance\*.ti,ab,kf. (11269)  
20  
21 95 field triage.ti,ab,kf. (275)  
22  
23 96 out-of-hospital.ti,ab,kf. (11317)  
24  
25 97 (nurse or nurses or nursing).ti,ab,kf. (462330)  
26  
27 98 exp nurses/ (89638)  
28  
29 99 exp nursing staff/ (67063)  
30  
31 100 Midwifery/ (19460)  
32  
33 101 (midwif\* or midwiv\*).ti,ab,kf. (25895)  
34  
35 102 or/50-101 [allied health professionals or nurses or midwives]  
36 (836031)  
37 103 49 and 102 [all CDSS and allied health professionals or nurses or  
38 midwives] (9549)  
39  
40  
41  
42  
43  
44  
45  
46  
47  
48  
49  
50  
51  
52  
53  
54  
55  
56  
57  
58  
59  
60



Supplementary Table 2: Risk of Bias assessment justifications using Effective Practice Organisation of Care (EPOC)’s tool

1. Randomised controlled trials, non-randomised trials and controlled before-after studies

| Random sequence generation                                      | Allocation concealment                          | Baseline outcome measurements similar             | Baseline characteristics similar                                                                      | Incomplete outcome data                                                              | Knowledge of the allocated interventions adequately prevented during the study | Protection against contamination                                                                                                          | Selective outcome reporting                                                       | Other bias                                    | Overall bias score |
|-----------------------------------------------------------------|-------------------------------------------------|---------------------------------------------------|-------------------------------------------------------------------------------------------------------|--------------------------------------------------------------------------------------|--------------------------------------------------------------------------------|-------------------------------------------------------------------------------------------------------------------------------------------|-----------------------------------------------------------------------------------|-----------------------------------------------|--------------------|
| <b>Beeckman et al, 2013</b>                                     |                                                 |                                                   |                                                                                                       |                                                                                      |                                                                                |                                                                                                                                           |                                                                                   |                                               |                    |
| “Simple randomisation was used to allocate nurses and patients” | Nurses and residents knew their allocated group | Reported baseline outcomes are broadly similar    | Baseline characteristics balanced/similar                                                             | No information if there was a problem of missing data or ways of handling it, if any | Assessors were not blinded                                                     | Intervention was allocated nursing homes, not individual patients                                                                         | All relevant outcomes in the methods section are reported in the results section  | There is no evidence of other risk of biases  | High               |
| <b>Blaha et al, 2009</b>                                        |                                                 |                                                   |                                                                                                       |                                                                                      |                                                                                |                                                                                                                                           |                                                                                   |                                               |                    |
| Not specified in paper.                                         | Not specified in paper.                         | No significant differences in glucose at baseline | Although reported for patients, baseline characteristics of nurses is not reported in text or tables. | Only 11 of 120 patients missing (9%)                                                 | The outcomes are objective.                                                    | Professionals were allocated within a clinic or practice and it is possible that communication between the two groups could have occurred | All relevant outcomes in the methods section are reported in the results section. | There is no evidence of other risk of biases. | Unclear            |
| <b>Byrne,2005</b>                                               |                                                 |                                                   |                                                                                                       |                                                                                      |                                                                                |                                                                                                                                           |                                                                                   |                                               |                    |
| Controlled before-after study.                                  | Controlled before-after study.                  | Models adjusted for covariates.                   | No report of baseline characteristics of patients or Nurses involved.                                 | Not specified in the paper.                                                          | Not specified in the paper.                                                    | Unit of allocation was the nursing home                                                                                                   | All relevant outcomes in the methods section are reported in the results section. | Multiple comparison                           | High               |
| <b>Canbolat et al,2019 (NRCT)</b>                               |                                                 |                                                   |                                                                                                       |                                                                                      |                                                                                |                                                                                                                                           |                                                                                   |                                               |                    |

| Random sequence generation                   | Allocation concealment                                 | Baseline outcome measurements similar                                             | Baseline characteristics similar                                                                                    | Incomplete outcome data                                           | Knowledge of the allocated interventions adequately prevented during the study | Protection against contamination                                                                                                                                          | Selective outcome reporting                                                       | Other bias                                                                    | Overall bias score |
|----------------------------------------------|--------------------------------------------------------|-----------------------------------------------------------------------------------|---------------------------------------------------------------------------------------------------------------------|-------------------------------------------------------------------|--------------------------------------------------------------------------------|---------------------------------------------------------------------------------------------------------------------------------------------------------------------------|-----------------------------------------------------------------------------------|-------------------------------------------------------------------------------|--------------------|
| Is Non-randomised trial.                     | It is an open label study.                             | No baseline measure of outcomes reported.                                         | No baseline information reported about the providers (Nurses); difference baseline characteristics patients present | Not specified in the paper.                                       | Not specified in the paper.                                                    | There was no randomisation; control and intervention groups were from the same clinic. Therefore, it is highly likely that control group could have received intervention | All relevant outcomes are reported in the results section.                        | No baseline (pre-intervention) outcomes data available so difficult to judge. | High               |
| <b>Cavalcanti et al, 209</b>                 |                                                        |                                                                                   |                                                                                                                     |                                                                   |                                                                                |                                                                                                                                                                           |                                                                                   |                                                                               |                    |
| 'Random numbers were generated by computer.' | 'Allocation was by centres at the start of the study.' | No baseline measure of outcomes reported in the paper.                            | Clinically significant differences in patients at baseline; no baseline information about HPs.                      | Outcomes reported were based on all participants (complete data). | Not specified in the paper.                                                    | Not specified in the paper.                                                                                                                                               | All relevant outcomes in the methods section are reported in the results section. | No evidence of other sources of bias.                                         | High               |
| <b>Cleveringa et al,2008</b>                 |                                                        |                                                                                   |                                                                                                                     |                                                                   |                                                                                |                                                                                                                                                                           |                                                                                   |                                                                               |                    |
| Block randomisation by practices and Nurses. | Unit of allocation was by practice.                    | Baseline outcomes were largely similar among the intervention and control groups. | Clinically significant differences in patients at baseline; no baseline information about HPs.                      | 'Values carried forward method' was used but not ideal method.    | Not specified in the paper.                                                    | Allocation unit was practice so unlikely that the control group received an intervention.                                                                                 | All relevant outcomes discussed in the objective are reported.                    | No evidence of other risk of biases.                                          | High               |

1  
2  
3  
4  
5  
6  
7  
8  
9  
10  
11  
12  
13  
14  
15  
16  
17  
18  
19  
20  
21  
22  
23  
24  
25  
26  
27  
28  
29  
30  
31  
32  
33  
34  
35  
36  
37  
38  
39  
40  
41  
42  
43  
44  
45  
46

| Random sequence generation                  | Allocation concealment                                  | Baseline outcome measurements similar                       | Baseline characteristics similar                                            | Incomplete outcome data          | Knowledge of the allocated interventions adequately prevented during the study                                          | Protection against contamination                                                               | Selective outcome reporting                                                       | Other bias                           | Overall bias score |
|---------------------------------------------|---------------------------------------------------------|-------------------------------------------------------------|-----------------------------------------------------------------------------|----------------------------------|-------------------------------------------------------------------------------------------------------------------------|------------------------------------------------------------------------------------------------|-----------------------------------------------------------------------------------|--------------------------------------|--------------------|
| <b>Cleveringa et al,2010</b>                |                                                         |                                                             |                                                                             |                                  |                                                                                                                         |                                                                                                |                                                                                   |                                      |                    |
| Not specified in the paper.                 | Unit of allocation was primary care practice.           | Baseline outcome measurements are largely similar.          | There is no report of baseline characteristics of Nurses in text or tables. | Use of electronic health records | Not specified in the paper.                                                                                             | Allocation was by primary care practices so unlikely that control group received intervention. | All relevant outcomes set out in the objective were reported.                     | No evidence of other risk of biases. | High               |
| <b>Cortez, 2014</b>                         |                                                         |                                                             |                                                                             |                                  |                                                                                                                         |                                                                                                |                                                                                   |                                      |                    |
| Not specified in the paper.                 | Allocation was based on clinic and nurses.              | Outcome measurements were different among the two groups    | Baseline characteristics were largely similar in both groups.               | Use of electronic health records | 'The study participants (nurses) did not know about the other group's usage of CDSS at the start and during the study.' | Nurses in the intervention group did not know about or receive CDSS during study.              | All relevant outcomes in the methods section are reported in the results section. | No evidence of other risk of biases. | High               |
| <b>Dalaba et al, 2015</b>                   |                                                         |                                                             |                                                                             |                                  |                                                                                                                         |                                                                                                |                                                                                   |                                      |                    |
| A controlled before-after study.            | A controlled before-after study.                        | Baseline outcome measurements were significantly different. | No report of baseline characteristics of HPs in text or tables              | Not specified in the paper.      | Not specified in the paper.                                                                                             | Comparison groups were in different districts.                                                 | All outcomes mentioned in the methods section have been reported.                 | No indication of other biases.       | High               |
| <b>Duclos et al,2015</b>                    |                                                         |                                                             |                                                                             |                                  |                                                                                                                         |                                                                                                |                                                                                   |                                      |                    |
| Randomisation computer generated centrally. | Allocation was by department at the start of the study. | Baseline outcome measures appear to be                      | Only aggregated baseline characteristics of children for                    | Medical records were used.       | Not specified in the paper.                                                                                             | Not specified in the paper.                                                                    | All relevant outcomes in the methods section are reported in the results section. | No indication of other biases.       | High               |

| Random sequence generation     | Allocation concealment                                                  | Baseline outcome measurements similar                | Baseline characteristics similar                                                                                           | Incomplete outcome data     | Knowledge of the allocated interventions adequately prevented during the study                         | Protection against contamination                                                                                                        | Selective outcome reporting                    | Other bias                                                                                | Overall bias score |
|--------------------------------|-------------------------------------------------------------------------|------------------------------------------------------|----------------------------------------------------------------------------------------------------------------------------|-----------------------------|--------------------------------------------------------------------------------------------------------|-----------------------------------------------------------------------------------------------------------------------------------------|------------------------------------------------|-------------------------------------------------------------------------------------------|--------------------|
|                                |                                                                         | different and were not adjusted for during analysis. | the intervention and control groups; and, no report about the HP participants' baseline characteristics in tables or text. |                             |                                                                                                        |                                                                                                                                         |                                                |                                                                                           |                    |
| <b>Dumont et al, 2012</b>      |                                                                         |                                                      |                                                                                                                            |                             |                                                                                                        |                                                                                                                                         |                                                |                                                                                           |                    |
| Simple randomisation used      | Randomisation was achieved by a Nurse choosing unmarked sealed envelope | No baseline measure of outcome reported.             | Patient characteristics reported and largely similar, but report on HP were presented as aggregated.                       | Not specified in the paper. | Not specified in the paper.                                                                            | Nurses were allocated within a clinic and it is possible that communication between intervention and control nurse could have occurred. | All outcomes in methods section were reported. | Performance bias risk from knowledge of cases, protocols and contamination highly likely. | High               |
| <b>Dykes et al, 2009</b>       |                                                                         |                                                      |                                                                                                                            |                             |                                                                                                        |                                                                                                                                         |                                                |                                                                                           |                    |
| Not specified in the paper     | Allocation was by unit at the start of the study                        | Baseline outcome measurements are largely similar.   | Patient characteristics were similar, but no information on HPs.                                                           | Medical records were used.  | Study noted as open-label design in the protocol; and, intervention and control units in one hospital. | Contamination of information highly likely; patients rather than professionals were randomised                                          | All outcomes in methods section were reported. | No indication of other biases.                                                            | High               |
| <b>Fitzmaurice et al, 2000</b> |                                                                         |                                                      |                                                                                                                            |                             |                                                                                                        |                                                                                                                                         |                                                |                                                                                           |                    |

1  
2  
3  
4  
5  
6  
7  
8  
9  
10  
11  
12  
13  
14  
15  
16  
17  
18  
19  
20  
21  
22  
23  
24  
25  
26  
27  
28  
29  
30  
31  
32  
33  
34  
35  
36  
37  
38  
39  
40  
41  
42  
43  
44  
45  
46

| Random sequence generation                       | Allocation concealment                   | Baseline outcome measurements similar                      | Baseline characteristics similar                                                                          | Incomplete outcome data                 | Knowledge of the allocated interventions adequately prevented during the study | Protection against contamination                                                          | Selective outcome reporting                                                                    | Other bias                                                                                        | Overall bias score |
|--------------------------------------------------|------------------------------------------|------------------------------------------------------------|-----------------------------------------------------------------------------------------------------------|-----------------------------------------|--------------------------------------------------------------------------------|-------------------------------------------------------------------------------------------|------------------------------------------------------------------------------------------------|---------------------------------------------------------------------------------------------------|--------------------|
| 'Randomisation was computer generated.'          | Not specified in the paper               | Baseline outcome measurements are largely similar.         | There is no report of baseline characteristics of HPs in text or tables                                   | Use of medical records.                 | Outcomes are objective.                                                        | Groups in same practice— possibility of communication between health professionals        | All relevant outcomes in the introduction/methods section are reported in the results section. | No evidence of other risk of biases.                                                              | High               |
| <b>Forberg et al,2016</b>                        |                                          |                                                            |                                                                                                           |                                         |                                                                                |                                                                                           |                                                                                                |                                                                                                   |                    |
| 'A simple draw from the list by a third person.' | Not specified in the paper               | Baseline measure of outcomes appear to be largely similar. | Baseline characteristics of the intervention and control groups are similar.                              | Missing outcomes is very minimal (<2%). | Not specified in the paper.                                                    | Not clear that nurses did not swap between units within the same hospital.                | All relevant outcomes in the methods section are reported in the results section.              | No evidence of other risk of biases.                                                              | High               |
| <b>Fossum et al,2011</b>                         |                                          |                                                            |                                                                                                           |                                         |                                                                                |                                                                                           |                                                                                                |                                                                                                   |                    |
| Controlled before-after study                    | Controlled before-after study            | Baseline outcome measurements are largely similar.         | Although reported for patients, baseline characteristics of providers was not reported in text or tables. | Use medical records.                    | Not specified in the paper.                                                    | Allocation was by nursing homes and is unlikely that control group received intervention. | All relevant outcomes in the methods section are reported in the results section.              | No evidence of other risk of biases.                                                              | High               |
| <b>Geurts et al, 2016</b>                        |                                          |                                                            |                                                                                                           |                                         |                                                                                |                                                                                           |                                                                                                |                                                                                                   |                    |
| 'Computer generated randomisation was used.'     | 'Centralised randomisation scheme used.' | No baseline measure of outcome in the paper.               | Baseline characteristics are largely similar among the two groups.                                        | Medical records used.                   | 'Nurses were blinded for the contribution of predictors on the risk score.'    | Patient based randomisation; a high possibility. Intra clinician and inter clinician      | All relevant outcomes in the methods section are reported in the results section.              | Question about representativeness of final study sample as 75% of eligible kids not randomised as | High               |

| Random sequence generation                                               | Allocation concealment                                                                              | Baseline outcome measurements similar                 | Baseline characteristics similar                                                                                    | Incomplete outcome data             | Knowledge of the allocated interventions adequately prevented during the study | Protection against contamination                                                                  | Selective outcome reporting                                                       | Other bias                             | Overall bias score |
|--------------------------------------------------------------------------|-----------------------------------------------------------------------------------------------------|-------------------------------------------------------|---------------------------------------------------------------------------------------------------------------------|-------------------------------------|--------------------------------------------------------------------------------|---------------------------------------------------------------------------------------------------|-----------------------------------------------------------------------------------|----------------------------------------|--------------------|
|                                                                          |                                                                                                     |                                                       |                                                                                                                     |                                     |                                                                                | contamination highly possible.                                                                    |                                                                                   | professional or parents non-compliant. |                    |
| <b>Hovorka et al, 2007</b>                                               |                                                                                                     |                                                       |                                                                                                                     |                                     |                                                                                |                                                                                                   |                                                                                   |                                        |                    |
| 'randomisation based on computer algorithm'                              | Centralised randomisation scheme was used.                                                          | No baseline measure of outcome reported in the paper. | Although some report about patients, no report of baseline characteristics about HP participants in text or tables. | Not specified in the paper.         | The outcomes were objective.                                                   | patients based randomisation; same clinicians involved in standard and intervention arms          | All relevant outcomes in the methods section are reported in the results section. | No evidence of other risk of biases.   | High               |
| <b>Kroth et al, 2006</b>                                                 |                                                                                                     |                                                       |                                                                                                                     |                                     |                                                                                |                                                                                                   |                                                                                   |                                        |                    |
| 'Randomisation using coin flip.'                                         | Not specified in the paper.                                                                         | No baseline measure of outcome.                       | There is no detailed report of characteristics in text or tables.                                                   | Consecutive [medical] records used. | objective outcome                                                              | Randomisation was for patients and nurses. Nurses in the control group did not receive reminders. | All relevant outcomes in the methods section are reported in the results section. | No evidence of other risk of biases.   | High               |
| <b>Lattimer et al, 1998</b>                                              |                                                                                                     |                                                       |                                                                                                                     |                                     |                                                                                |                                                                                                   |                                                                                   |                                        |                    |
| 'A random number generator pocket calculator (Hewlett Packard 21s) used' | Unit of allocation was by team and allocation was performed on all units at the start of the study. | No baseline measure of outcome reported.              | Some about patients, but no report of baseline characteristics HPs in text or tables.                               | Not specified in the paper.         | Use of medical records.                                                        | Health professionals in the intervention (Nurses) and control (Doctors) were different.           | All relevant outcomes in the methods section are reported in the results section. | No evidence of other risk of biases.   | Unclear            |

| Random sequence generation            | Allocation concealment      | Baseline outcome measurements similar                                            | Baseline characteristics similar                                     | Incomplete outcome data     | Knowledge of the allocated interventions adequately prevented during the study | Protection against contamination                                                                  | Selective outcome reporting                                                       | Other bias                           | Overall bias score |
|---------------------------------------|-----------------------------|----------------------------------------------------------------------------------|----------------------------------------------------------------------|-----------------------------|--------------------------------------------------------------------------------|---------------------------------------------------------------------------------------------------|-----------------------------------------------------------------------------------|--------------------------------------|--------------------|
| <b>Lattimer et al,2000</b>            |                             |                                                                                  |                                                                      |                             |                                                                                |                                                                                                   |                                                                                   |                                      |                    |
| Not specified in the paper.           | Not specified in the paper. | Not specified in the paper.                                                      | There is no detailed report of characteristics in text or tables     | Not specified in the paper. | Use of medical records.                                                        | Health professionals in the intervention (Nurses) and control (Doctors) were different.           | All relevant outcomes in the methods section are reported in the results section. | No evidence of other risk of biases. | Unclear            |
| <b>Lee et al, 2009</b>                |                             |                                                                                  |                                                                      |                             |                                                                                |                                                                                                   |                                                                                   |                                      |                    |
| Not specified in the paper.           | Not specified in the paper. | Although weight and BMI data were recorded, no data on the outcome measurements. | Reported for patients, but no report on providers in text or tables. | Not specified in the paper. | Not specified in the paper.                                                    | Patients based randomisation so it is likely that the control group received the intervention.    | All relevant outcomes in the methods section are reported in the results section. | No evidence of other risk of biases. | High               |
| <b>Lv et al, 2019</b>                 |                             |                                                                                  |                                                                      |                             |                                                                                |                                                                                                   |                                                                                   |                                      |                    |
| Not specified in the paper.           | Not specified in the paper. | Not specified in the paper.                                                      | Reported for patients, but no report on providers in text or tables. | Not specified in the paper. | Not specified in the paper.                                                    | Patients based randomisation; Patient based randomisation; same clinicians involved in both arms. | All relevant outcomes in the methods section are reported in the results section. | No evidence of other risk of biases. | High               |
| <b>Mann et al,2011</b>                |                             |                                                                                  |                                                                      |                             |                                                                                |                                                                                                   |                                                                                   |                                      |                    |
| Computer generated sequence was used. | Not specified in the paper. | Baseline measure of outcome not reported.                                        | No baseline characteristics of HPs in text or tables were found.     | Not clear from the paper.   | A cross-over study; not specified in the paper.                                | Acrossover trial with only patients rather than professionals randomised.                         | All relevant outcomes in the methods section are reported in the results section. | No evidence of other risk of biases. | High               |

| Random sequence generation              | Allocation concealment                        | Baseline outcome measurements similar                               | Baseline characteristics similar                                      | Incomplete outcome data               | Knowledge of the allocated interventions adequately prevented during the study | Protection against contamination                                                                                                     | Selective outcome reporting                                                       | Other bias                                                                                                                                                   | Overall bias score |
|-----------------------------------------|-----------------------------------------------|---------------------------------------------------------------------|-----------------------------------------------------------------------|---------------------------------------|--------------------------------------------------------------------------------|--------------------------------------------------------------------------------------------------------------------------------------|-----------------------------------------------------------------------------------|--------------------------------------------------------------------------------------------------------------------------------------------------------------|--------------------|
| <b>McDonald et al, 2017</b>             |                                               |                                                                     |                                                                       |                                       |                                                                                |                                                                                                                                      |                                                                                   |                                                                                                                                                              |                    |
| Automated block randomisation was used. | Automated block randomisation schema was used | Not specified in the paper.                                         | Baseline characteristics were largely similar.                        | Possible medical records use.         | Assessor was not blinded.                                                      | Both intervention and control nurses were in one organisation and it is possible that communication between them could have occurred | All relevant outcomes in the methods section are reported in the results section. | Only 42% of patients who should have had a CDSS applied suggesting that the nurses selectively chose which patients to use it with or selective non adoption | High               |
| <b>Paulson et al, 2020</b>              |                                               |                                                                     |                                                                       |                                       |                                                                                |                                                                                                                                      |                                                                                   |                                                                                                                                                              |                    |
| Automated block randomisation was used. | Automated block randomisation schema was used | Reported for patients, but no report on providers in text or tables | Baseline characteristics were largely similar                         | Only complete case analysis conducted | Outcomes are objective                                                         | Both intervention and control nurses were in one organisation and it is possible that communication between them could have occurred | All relevant outcomes in the methods section are reported in the results section. | No evidence of other risk of biases.                                                                                                                         | High               |
| <b>Plank et al, 2006</b>                |                                               |                                                                     |                                                                       |                                       |                                                                                |                                                                                                                                      |                                                                                   |                                                                                                                                                              |                    |
| Not specified in the paper              | Not specified in the paper                    | Blood glucose measured but not intervention group based             | Differences in types of surgery and history of diabetes between sites | Use of medical records.               | Outcomes are objective.                                                        | same units delivering all arms of the trial with same clinicians                                                                     | All relevant outcomes in the methods section are reported in the results section. | No evidence of other risk of biases.                                                                                                                         | High               |
| <b>Rood et al, 2005</b>                 |                                               |                                                                     |                                                                       |                                       |                                                                                |                                                                                                                                      |                                                                                   |                                                                                                                                                              |                    |

1  
2  
3  
4  
5  
6  
7  
8  
9  
10  
11  
12  
13  
14  
15  
16  
17  
18  
19  
20  
21  
22  
23  
24  
25  
26  
27  
28  
29  
30  
31  
32  
33  
34  
35  
36  
37  
38  
39  
40  
41  
42  
43  
44  
45  
46



1  
2  
3  
4  
5  
6  
7  
8  
9  
10  
11  
12  
13  
14  
15  
16  
17  
18  
19  
20  
21  
22  
23  
24  
25  
26  
27  
28  
29  
30  
31  
32  
33  
34  
35  
36  
37  
38  
39  
40  
41  
42  
43  
44  
45  
46

| Random sequence generation                     | Allocation concealment                                                                                                | Baseline outcome measurements similar                      | Baseline characteristics similar                                                      | Incomplete outcome data                                                                                | Knowledge of the allocated interventions adequately prevented during the study | Protection against contamination                                                                                                                                       | Selective outcome reporting                                                       | Other bias                           | Overall bias score |
|------------------------------------------------|-----------------------------------------------------------------------------------------------------------------------|------------------------------------------------------------|---------------------------------------------------------------------------------------|--------------------------------------------------------------------------------------------------------|--------------------------------------------------------------------------------|------------------------------------------------------------------------------------------------------------------------------------------------------------------------|-----------------------------------------------------------------------------------|--------------------------------------|--------------------|
| 'Automatic random number generating'           | Not specified in the paper                                                                                            | Baseline measure of outcome not reported.                  | No report of characteristics of HPs in text or tables.                                | Not specified in the paper.                                                                            | Not specified in the paper.                                                    | Patient based randomisation; same clinicians involved in both arms.                                                                                                    | There is no evidence that outcomes were selectively reported.                     | No evidence of other risk of biases. | High               |
| <b>Roukema et al,2008</b>                      |                                                                                                                       |                                                            |                                                                                       |                                                                                                        |                                                                                |                                                                                                                                                                        |                                                                                   |                                      |                    |
| Randomisation was based on computer algorithm. | 'centralised randomisation scheme'                                                                                    | Baseline measure of outcome not reported                   | No report of characteristics of HPs in text or tables.                                | Not specified in the paper.                                                                            | Not specified in the paper.                                                    | professionals were allocated within a clinic so hard to see how decision rule training effect not present in the clinicians who were delivering both arms of the trial | All relevant outcomes in the methods section are reported in the results section. | No evidence of other risk of biases. | High               |
| <b>Sassen et al,2014</b>                       |                                                                                                                       |                                                            |                                                                                       |                                                                                                        |                                                                                |                                                                                                                                                                        |                                                                                   |                                      |                    |
| Not specified in the paper.                    | The unit of allocation was by health professional and allocation was performed on all units at the start of the study | No important differences were present across study groups. | Baseline characteristics of the study and control providers are reported and similar. | Significant proportion participants dropped out and the report is based on the complete case analysis. | Outcomes cannot be assessed blindly.                                           | Participants in the control group did not have a log-in code to access the website (CDSS tool) until post-intervention data were collected.                            | All relevant outcomes in the methods section are reported in the results section. | No evidence of other risk of biases. | High               |
| <b>Snooks et al, 2014</b>                      |                                                                                                                       |                                                            |                                                                                       |                                                                                                        |                                                                                |                                                                                                                                                                        |                                                                                   |                                      |                    |

| Random sequence generation                 | Allocation concealment                                                  | Baseline outcome measurements similar     | Baseline characteristics similar                                              | Incomplete outcome data     | Knowledge of the allocated interventions adequately prevented during the study | Protection against contamination                                                                                   | Selective outcome reporting                                                       | Other bias                                                      | Overall bias score |
|--------------------------------------------|-------------------------------------------------------------------------|-------------------------------------------|-------------------------------------------------------------------------------|-----------------------------|--------------------------------------------------------------------------------|--------------------------------------------------------------------------------------------------------------------|-----------------------------------------------------------------------------------|-----------------------------------------------------------------|--------------------|
| Randomisation based on computer algorithm. | Random allocation was performed on all units at the start of the study. | No baseline measure of outcome reported.  | No report of characteristics in text or tables about the paramedics involved. | Not specified in the paper. | Analyst was blinded.                                                           | Intervention and control groups were in separates sites                                                            | All relevant outcomes in the methods section are reported in the results section. | No evidence of other risk of biases.                            | Unclear            |
| <b>Vadher et al, 1997</b>                  |                                                                         |                                           |                                                                               |                             |                                                                                |                                                                                                                    |                                                                                   |                                                                 |                    |
| Random tables were used.                   | Not specified in the paper.                                             | No baseline measure of outcome reported.  | Patient baseline characteristics reported; one nurse versus a clinician.      | Not specified in the paper. | Outcomes are objectively measured.                                             | Hard to see how same clinicians seeing both arm trial patients didn't pick up something from the CDSS.             | All relevant outcomes in the methods section are reported in the results section. | There was only one Nurse participant in the intervention group. | High               |
| <b>Wells,2013</b>                          |                                                                         |                                           |                                                                               |                             |                                                                                |                                                                                                                    |                                                                                   |                                                                 |                    |
| Random table was used for randomisation.   | Not specified in the paper.                                             | No baseline measure of outcomes reported. | Baseline characteristics are largely similar.                                 | Not specified in the paper. | Outcomes were assessed blindly.                                                | Intervention and control groups in the same site so it is likely that the control group received the intervention. | All relevant outcomes in the methods section are reported in the results section  | No evidence of other risk of biases.                            | High               |

Colour codes: Red, high risk; orange, unclear risk; green, low risk

2. Interrupted time series studies

| Author & Year      | Risk of bias domains and scores                                                                               |                                                                                        |                                                                                                |                                                                                |                                    |                                                                                   |                                      | Overall bias |
|--------------------|---------------------------------------------------------------------------------------------------------------|----------------------------------------------------------------------------------------|------------------------------------------------------------------------------------------------|--------------------------------------------------------------------------------|------------------------------------|-----------------------------------------------------------------------------------|--------------------------------------|--------------|
|                    | Intervention independent of other changes                                                                     | Shape of the intervention effect pre-specified                                         | Intervention unlikely to affect data collection                                                | Knowledge of the allocated interventions adequately prevented during the study | Incomplete outcome data adequately | Selective outcome reporting                                                       | Other bias                           |              |
| Bennet, 2016       | Very long adoption period with no measurement; possible confounding factors not presented/models not adjusted | Data were classified as pre and post-intervention from the point/date of intervention. | Data were collected from the hospital records databases for pre- and post-intervention periods | Not presented in the paper.                                                    | Medical records used               | All relevant outcomes in the methods section are reported in the results section. | No evidence of other risk of biases. | High         |
| Dykes et al,2020   | Highly likely the changes in outcome to be influenced by confounders.                                         | Point of analysis is the point of intervention.                                        | Sources and methods of data collection were the same before and after the intervention.        | Not presented in the paper.                                                    | Medical records used               | All relevant outcomes are reported in the results section                         | No evidence of other risk of biases. | High         |
| Dowding et al,2012 | Highly likely the changes in outcome to be influenced by confounders.                                         | Point of analysis is the point of intervention.                                        | Sources and methods of data collection were the same before and after the intervention.        | Not presented in paper.                                                        | Medical records used               | All relevant outcomes are reported in the results section.                        | No evidence of other risk of biases. | High         |

Colour codes: Red, high risk; orange, unclear risk; green, low risk

Supplementary Table 3: Summary of patient care process results

| Author & Year                                                    | Interventions     | Health professionals | patient participants | Outcome measured                                                                                   | Outcome values reported             | Change of value within a group <sup>†</sup> | Risk difference (95% CI) <sup>‡</sup>  |
|------------------------------------------------------------------|-------------------|----------------------|----------------------|----------------------------------------------------------------------------------------------------|-------------------------------------|---------------------------------------------|----------------------------------------|
| <b>1. Adherence to guidelines</b>                                |                   |                      |                      |                                                                                                    |                                     |                                             |                                        |
| Dumont et al, 2012                                               | • CDSS use        | Nurses (OA=44)       | 141 adults           | Deviations from the protocol, out of 10 (mean (SD))                                                | 4 months=0.39(1.0)                  | -                                           | Mean difference: -2.61 (-4.5 to -0.71) |
|                                                                  | • Paper protocol  | Nurses               | 159 adults           |                                                                                                    | 4 months=3.0(4.3)                   |                                             |                                        |
| Forberg et al, 2016                                              | • CDSS-use        | 108 Nurses           | Not applicable       | Nurses adherence to guidelines on disinfection of hands                                            | Baseline=97/108<br>3 months =93/105 | -1.2%                                       | 6.7% (4.9 to 8.5)                      |
|                                                                  | • CDSS non-use    | 103 Nurses           | Not applicable       |                                                                                                    | Baseline=96/103<br>3 months=87/102  | -7.9%                                       |                                        |
|                                                                  | • CDSS-use        |                      |                      | Nurses adherence to guidelines on usage of disposable gloves (n/N)                                 | Baseline=80/108<br>3 months =76/105 | -1.7%                                       | -1.4% (-2.2 to -0.5)                   |
|                                                                  | • CDSS non-use    |                      |                      |                                                                                                    | Baseline=71/103<br>3 months =70/102 | -0.3%                                       |                                        |
|                                                                  | • CDSS-use        |                      |                      | Nurses adherence to guidelines on daily inspection of Peripheral Venous Catheters (PVC) site (n/N) | Baseline=58/108<br>3 months =58/103 | 2.6%                                        | -5.2% (-7.1 to -3.3)                   |
|                                                                  | • CDSS non-use    |                      |                      |                                                                                                    | Baseline=47/102<br>3 months =55/102 | 7.8%                                        |                                        |
| Rood et al, 2005                                                 | • CDSS-based GL   | ICU Nurses           | 66 adults            | Adherence to Insulin dose Advice (n/N)                                                             | 10 weeks =1818/2352                 | -                                           | 22% (19 to 25)                         |
|                                                                  | • Paper-based GL  | ICU Nurses           | 54 adults            |                                                                                                    | 10 weeks =1667/2597                 | -                                           |                                        |
|                                                                  | • CDSS-based GL   | ICU Nurses           | 66 adults            | Adherence to the guideline for taking blood samples on time (n/N)                                  | 10 weeks =945/2352                  | -                                           | 4.7% (2.0 to 7.4)                      |
|                                                                  | • Paper-based GL  | ICU Nurses           | 54 adults            |                                                                                                    | 10 weeks =922/2597                  | -                                           |                                        |
| Vadher et al, 1997                                               | • CDSS            | 1 Nurse              | 87 adults            | Dose advice 'acceptance' in patients with therapeutic range 2-3                                    | Post-test =188/214                  | -                                           | 28% (20.4 to 35.5)                     |
|                                                                  | • Control         | 3 trainee Doctors    | 90 adults            |                                                                                                    | Post-test=145/242                   | -                                           |                                        |
|                                                                  | • CDSS            | 1 Nurse              |                      | Dose advice 'acceptance' in patients with therapeutic range 3-4.5 (n/N)                            | Post-test =160/239                  | -                                           | -6.2% (-14.7 to 2.2)                   |
|                                                                  | • Control         | 3 trainee Doctors    |                      |                                                                                                    | Post-test=150/205                   |                                             |                                        |
|                                                                  | • CDSS            | 1 Nurse              |                      | Interval advice 'acceptance' (%) in patients with therapeutic range 2-3                            | Post-test =170/230                  | -                                           | 23.9% (15.6 to 32.2)                   |
|                                                                  | • Control         | 3 trainee Doctors    |                      |                                                                                                    | Post-test=133/266                   |                                             |                                        |
|                                                                  | • CDSS            | 1 Nurse              |                      | Interval advice 'acceptance' (%) in patients with therapeutic range 3-4.5                          | Post-test =129/239                  | -                                           | 3.9% (-5.4 to 13.3)                    |
|                                                                  | • Control         | 3 trainee Doctors    |                      |                                                                                                    | Post-test=101/202                   |                                             |                                        |
| <b>2. Patient assessment, diagnosis, and treatment practices</b> |                   |                      |                      |                                                                                                    |                                     |                                             |                                        |
| Bennett et al,                                                   | • CDSS use period |                      |                      | Pain assessment                                                                                    | Post-test=97.7%                     | -                                           | 62.7% (59.6 to 65.8)                   |

1  
2  
3  
4  
5  
6  
7  
8  
9  
10  
11  
12  
13  
14  
15  
16  
17  
18  
19  
20  
21  
22  
23  
24  
25  
26  
27  
28  
29  
30  
31  
32  
33  
34  
35  
36  
37  
38  
39  
40  
41  
42  
43  
44  
45  
46

|                                 |                |               |                |                                                       |                       |   |                                       |
|---------------------------------|----------------|---------------|----------------|-------------------------------------------------------|-----------------------|---|---------------------------------------|
| 2016                            | • CDSS non use |               |                |                                                       | Pre-test=35%          |   |                                       |
|                                 | • CDSS use     |               |                | IV antibiotics in 1hr for sepsis                      | Post-test=5.6%        | - | -5.9% (-8.3 to -3.5)                  |
|                                 | • CDSS non use |               |                |                                                       | Pre-test=11.5%        |   |                                       |
| Duclos et al, 2015              | • CDSS         | Dieticians    | 667 children   | Investigation of malnutrition aetiology               | Post-test=284/667     | - | 21.2% (15.9 to 26.5)                  |
|                                 | • Usual care   | Dieticians    | 477 children   |                                                       | Post-test=102/477     |   |                                       |
|                                 | • CDSS         | Dieticians    | 667 children   | Managed by a dietitian                                | Post-test=305/667     | - | 12% (6.3 to 17.7)                     |
|                                 | • Usual care   | Dieticians    | 477 children   |                                                       | Post-test=161/477     |   |                                       |
|                                 | • CDSS         | Dieticians    | 667 children   | prescribed refeeding protocol                         | Post-test=230/667     | - | -4.5% (-10.2 to 1.2)                  |
|                                 | • Usual care   | Dieticians    | 477 children   |                                                       | Post-test=186/477     |   |                                       |
| Geurts et al, 2017              | • CDSS         | Nurses        | 113 children   | Patient consultation time(min)-median (IQR)           | Post-test =136(108)   | - | 3 min                                 |
|                                 | • Usual care   | Nurses        | 109 children   |                                                       | Post-test =133(92)    |   |                                       |
|                                 | • CDSS         | Nurses        | 113 children   | Electrolytes level test                               | Post-test =15/113     | - | -7.8% (-17.7 to 2.1)                  |
|                                 | • Usual care   | Nurses        | 109 children   |                                                       | Post-test =23/109     |   |                                       |
|                                 | • CDSS         | Nurses        | 113 children   | Acid-base balance test                                | Post-test =13/113     | - | -3.2% (-12.1 to 5.7)                  |
|                                 | • Usual care   | Nurses        | 109 children   |                                                       | Post-test =16/109     |   |                                       |
|                                 | • CDSS         | Nurses        | 113 children   | Oral Rehydration Solution (nasogastric tube)          | Post-test =17/113     | - | 6.7% (-1.6 to 15.2)                   |
|                                 | • Usual care   | Nurses        | 109 children   |                                                       | Post-test =9/109      |   |                                       |
|                                 | • CDSS         | Nurses        | 113 children   | IV rehydration given                                  | Post-test =0/113      | - | -1.8% (-4.4 to 0.7)                   |
|                                 | • Usual care   | Nurses        | 109 children   |                                                       | Post-test =2/109      |   |                                       |
|                                 | • CDSS         | Nurses        | 113 children   | Other liquid given                                    | Post-test =18/113     | - | -11.6% (-22.4 to -0.8)                |
|                                 | • Usual care   | Nurses        | 109 children   |                                                       | Post-test =30/109     |   |                                       |
| Roukema et al, 2008             | • CDSS use     | Nurses        | 74 children    | Time spent in ED (minutes), median (IQR)              | 27 months =138 (77)   | - | 15 minutes                            |
|                                 | • Control      | Nurses        | 90 children    |                                                       | 27 months =123 (96)   |   |                                       |
|                                 | • CDSS use     | Nurses        | 74 children    | Time spent in ED for lab test (minutes), median (IQR) | 27 months =140 (68)   | - | -20 minutes                           |
|                                 | • Control      | Nurses        | 90 children    |                                                       | 27 months =160 (98)   |   |                                       |
| Snooks et al, 2014              | • CDSS         | 17 Paramedics | 436 adults     | Mean length of episode of care (minutes)              | CDSS Vs control       | - | -5.7 min (-38.5 to 27.2) <sup>†</sup> |
|                                 | • Control      | 19 Paramedics | 343 adults     |                                                       |                       |   |                                       |
| Wells, 2013                     | • CDSS         | 22 paramedics | 436 adults     | Respiratory rate recorded, %                          | 1 year =405/436       | - | -1.2% (-4.7 to 2.2)                   |
|                                 | • Control      | 20 paramedics | 341 adults     |                                                       | 1 year =321/341       |   |                                       |
|                                 | • CDSS         | 22 paramedics | 436 adults     | Pulse rate recorded                                   | 1 year =414/436       | - | 0.9% (-3.9 to 2.0)                    |
|                                 | • Control      | 20 paramedics | 341 adults     |                                                       | 1 year =327/341       |   |                                       |
|                                 | • CDSS         | 22 paramedics | 436 adults     | Consciousness recorded                                | 1 year =405/436       | - | -5.1% (-7.9 to -2.2)                  |
|                                 | • Control      | 20 paramedics | 341 adults     |                                                       | 1 year =334/341       |   |                                       |
| Kroth et al, 2006               | • CDSS use     | 164 Nurses    | Not applicable | Proportion of erroneously recorded temperatures       | 9 months =248/45823   | - | -0.8% (-0.9 to -0.6)                  |
|                                 | • Control      | 173 Nurses    | Not applicable |                                                       | 9 months =575/44339   |   |                                       |
| <b>3. Documenting of events</b> |                |               |                |                                                       |                       |   |                                       |
| Dowding et al                   | • CDSS use     | Nurses        |                | Fall documentation ratio                              | Post-CDSS use Vs pre- | - | 1.4 (0.03 to 73.7) <sup>†</sup>       |

|                             |                                                                                                              |               |            |  |                                                                  |                                      |   |                                 |
|-----------------------------|--------------------------------------------------------------------------------------------------------------|---------------|------------|--|------------------------------------------------------------------|--------------------------------------|---|---------------------------------|
| al,2012                     | <ul style="list-style-type: none"> <li>• CDSS non-use</li> <li>• CDSS use</li> <li>• CDSS non-use</li> </ul> | Nurses        |            |  | CDSS use period                                                  |                                      |   |                                 |
|                             |                                                                                                              |               |            |  | Hospital acquired pressure ulcer (HAPU) risk documentation ratio | Post-CDSS use Vs pre-CDSS use period | - | 9.1 (1.95 to 42.5) <sup>†</sup> |
| Paulson et al, 2020         | <ul style="list-style-type: none"> <li>• CDSS use</li> <li>• Usual care</li> </ul>                           | Nurses        | 44 adults  |  | Documentation of nutritional intake compared to requirements     | 10 months=37/44                      | - | 80% (67 to 92)                  |
|                             | <ul style="list-style-type: none"> <li>• CDSS use</li> <li>• Usual care</li> </ul>                           | Nurses        | 50 adults  |  | Documentation of a nutritional care plan                         | 10 months=2/50                       | - | 54.4% (37.6 to 71.3)            |
|                             | <ul style="list-style-type: none"> <li>• CDSS use</li> <li>• Usual care</li> </ul>                           | Nurses        | 44 adults  |  | Documentation of nutritional treatment                           | 10 months=31/44                      | - | 23.8% (6 to 41.6)               |
|                             | <ul style="list-style-type: none"> <li>• CDSS use</li> <li>• Usual care</li> </ul>                           | Nurses        | 50 adults  |  |                                                                  | 10 months=8/50                       | - |                                 |
|                             | <ul style="list-style-type: none"> <li>• CDSS use</li> <li>• Usual care</li> </ul>                           | Nurses        | 44 adults  |  |                                                                  | 10 months=36/44                      | - |                                 |
|                             | <ul style="list-style-type: none"> <li>• CDSS use</li> <li>• Usual care</li> </ul>                           | Nurses        | 50 adults  |  |                                                                  | 10 months=29/50                      | - |                                 |
| <b>4. Patient referrals</b> |                                                                                                              |               |            |  |                                                                  |                                      |   |                                 |
| Snooks et al, 2014          | <ul style="list-style-type: none"> <li>• CDSS</li> <li>• Control</li> </ul>                                  | 17 Paramedics | 436 adults |  | Patients referred to falls service                               | 1 year=42/436                        | - | 4.7% (1.1 to 8.3)               |
|                             |                                                                                                              | 19 Paramedics | 343 adults |  |                                                                  | 1 year=17/343                        |   |                                 |

Note: ‡, calculated from reported information unless stated otherwise; †, as reported by study authors.

Supplementary Table 4: Summary of patient care outcomes results

| Author & Year               | Interventions                                                                                                                                                            | Health professionals | patient participants | Outcome measured                                          | Outcome values reported | Change of value within a group <sup>‡</sup> | Risk difference (95% CI) <sup>‡</sup>                                         |
|-----------------------------|--------------------------------------------------------------------------------------------------------------------------------------------------------------------------|----------------------|----------------------|-----------------------------------------------------------|-------------------------|---------------------------------------------|-------------------------------------------------------------------------------|
| <b>1. Glycaemic control</b> |                                                                                                                                                                          |                      |                      |                                                           |                         |                                             |                                                                               |
| Blaha et al, 2009           | <ul style="list-style-type: none"> <li>CDSS (eMPC)</li> <li>Mathias protocol</li> <li>Bath-protocol</li> </ul>                                                           | ICU Nurses           | 40 adults            | Entire study time in target range (blood glucose)- mmol/l | After 48hrs=46%         | -                                           | Versus Mathias: 7.8% (-13.7 to 29.4)<br>Versus Bath 6.3% (-3.9 to 16.5)       |
|                             |                                                                                                                                                                          |                      | 40 adults            |                                                           | After 48hrs=38.2%       | -                                           |                                                                               |
|                             |                                                                                                                                                                          |                      | 40 adults            |                                                           | After 48hrs=39.7%       | -                                           |                                                                               |
|                             | <ul style="list-style-type: none"> <li>CDSS (eMPC)</li> <li>Mathias protocol</li> <li>Bath-protocol</li> </ul>                                                           | ICU Nurses           | 40 adults            | Entire study mean blood glucose (SE)- mmol/l              | Baseline=8.1(0.6)       | -2.2 mmol/l                                 | Versus Mathias: -1 mmol/l<br>Versus Bath: -0.7 mmol/l                         |
|                             |                                                                                                                                                                          |                      | 40 adults            |                                                           | 48hrs=5.9(0.2)          | -1.2 mmol/l                                 |                                                                               |
|                             |                                                                                                                                                                          |                      | 40 adults            |                                                           | Baseline=7.9(0.4)       | -1.5 mmol/l                                 |                                                                               |
| Canbolat et al, 2019        | <ul style="list-style-type: none"> <li>CDSS (automated BG control)</li> <li>Standard protocol</li> </ul>                                                                 | Nurses<br>Physicians | 33 adults            | Occasions for BG out of target (120 to 180 mg/dL) range   | 22 months =2101/5789    | -                                           | -21.8% (-23.7 to -20.0)                                                       |
|                             |                                                                                                                                                                          |                      | 33 adults            |                                                           | 22 months =2977/5122    | -                                           |                                                                               |
|                             |                                                                                                                                                                          |                      |                      |                                                           | 22 months =745/5789     | -28.1% (-29.7 to -26.5)                     |                                                                               |
| Cavalcanti et al, 2009      | <ul style="list-style-type: none"> <li>CDSS (computer-assisted insulin protocol)</li> <li>Control (Leuven protocol)</li> <li>Control (conventional treatment)</li> </ul> | ICU Nurses           | 56 adults            | Mean blood glucose (mmol/dL)                              | 19 months =125          | -                                           | Versus Leuven -2.1 mmol/dL<br>Versus conventional -33.5 mmol/dL               |
|                             |                                                                                                                                                                          |                      | 58 adults            |                                                           | 19 months =127.1        | -                                           |                                                                               |
|                             |                                                                                                                                                                          |                      | 53 adults            |                                                           | 19 months =158.5        | -                                           |                                                                               |
|                             | <ul style="list-style-type: none"> <li>CDSS (computer-assisted insulin protocol)</li> <li>Control (Leuven protocol)</li> <li>Control (conventional treatment)</li> </ul> | ICU Nurses           | 56 adults            | Patients with hypoglycaemia                               | 19 months =12/56        | -                                           | Versus Leuven -20% (-36.6 to -3.4)<br>Versus conventional 17.6% (5.7 to 29.5) |
|                             |                                                                                                                                                                          |                      | 58 adults            |                                                           | 19 months =24/58        | -                                           |                                                                               |
|                             |                                                                                                                                                                          |                      | 53 adults            |                                                           | 19 months =2/53         | -                                           |                                                                               |
| Cleveringa et al, 2008      | <ul style="list-style-type: none"> <li>CDSS use in diabetic patients</li> <li>Usual care</li> <li>CDSS use in diabetic patients</li> </ul>                               | Nurses               | 1699 adults          | A1C<7%                                                    | Baseline=60.8%          | 7.2%                                        | 4.6% (2.7 to 6.5)                                                             |
|                             |                                                                                                                                                                          |                      | 1692 adults          |                                                           | 1 year=68%              | 2.6%                                        |                                                                               |
|                             |                                                                                                                                                                          |                      | 1699 adults          |                                                           | Baseline=61.6%          | 10.2% (7.9 to 12.5)                         |                                                                               |
|                             |                                                                                                                                                                          |                      |                      | Systolic BP<140                                           | 1 Year=64.2%            | 12.9%                                       |                                                                               |
|                             |                                                                                                                                                                          |                      |                      |                                                           | Baseline=41%            |                                             |                                                                               |
|                             |                                                                                                                                                                          |                      |                      |                                                           | 1 year=53.9%            |                                             |                                                                               |

|                                        |                                 |            |              |                                                                            |                                      |       |                       |
|----------------------------------------|---------------------------------|------------|--------------|----------------------------------------------------------------------------|--------------------------------------|-------|-----------------------|
|                                        | • Usual care                    |            | 1692 adults  |                                                                            | Baseline=39.5%<br>1 year=42.2%       | 2.7%  |                       |
|                                        | • CDSS use in diabetic patients |            | 1699 adults  |                                                                            | Baseline=36.2%<br>1 year=49.0%       | 10.5% | 3.7% (1.2 to 6.2)     |
|                                        | • Usual care                    |            | 1692 adults  | Total cholesterol<br><4.5mmol/l                                            | Baseline=38.5%<br>1 year=45.3%       | 6.8%  |                       |
| Hovorka et al, 2007                    | • CDSS (eMPC)                   | ICU Nurses | 30 adults    | Proportion in target range (4-6.1 mmol/L)                                  | 48 hrs =60.4%                        | -     | 32.9% (20.0 to 46.0)  |
|                                        | • Usual care                    | ICU Nurses | 30 adults    |                                                                            | 48 hrs =27.5%                        |       |                       |
|                                        | • CDSS (eMPC)                   |            |              | Entire study mean blood glucose (mmol/L) (SD)                              | 48 hrs =6.2 (1.1)                    | -     | -1mmol/L              |
|                                        | • Usual care                    |            |              |                                                                            | 48 hrs =7.2 (1.1)                    |       |                       |
|                                        | • CDSS (eMPC)                   |            |              | Time in target range (hours)                                               | 48 hrs =14.5                         |       | 7.9 hrs               |
|                                        | • Usual care                    |            |              |                                                                            | 48 hrs =6.6                          |       |                       |
| Mann et al, 2011                       | • CDSS use                      | ICU Nurses | 18 adults    | Occasions glucose range on target (80 to 110 mg/dl)                        | 72 hrs =47%                          | -     | 6% (-7.7 to 19.7)     |
|                                        | • Paper protocol                | ICU Nurses | 18 adults    |                                                                            | 72 hrs =41%                          |       |                       |
|                                        | • CDSS use                      | ICU Nurses |              | Occasions over target range (over 110 mg/dl)                               | 72 hrs =49%                          | -     | -5% (-18.8 to 8.8)    |
|                                        | • Paper protocol                | ICU Nurses |              |                                                                            | 72 hrs =54%                          |       |                       |
|                                        | • CDSS use                      |            |              | Occasions under target (under 80 mg/dl) range                              | 72 hrs =4.5%                         | -     | -0.3% (-2.1 to 1.5)   |
|                                        | • Paper protocol                |            |              |                                                                            | 72 hrs =4.8%                         |       |                       |
| Plank et al, 2006                      | • CDSS (MPC) use                | ICU Nurses | Not reported | Occasions within the target glycaemic range (80-110 mg/dl)                 | 48 hrs =52%                          | -     | 33% (20.5 to 45.4)    |
|                                        | • Usual care                    | ICU Nurses | Not reported |                                                                            | 48 hrs =19%                          |       |                       |
|                                        | • CDSS (MPC) use                | ICU Nurses | Not reported | Improvement glycaemic control for 48 hours                                 | 48 hrs =65%                          | -     | 40% (27.4 to 52.6)    |
|                                        | • Usual care                    | ICU Nurses | Not reported |                                                                            | 48 hrs =25%                          |       |                       |
|                                        | • CDSS (MPC) use                |            | Not reported | Occasions over the target glycaemic range (>110 mg/dl)                     | 48 hrs =46%                          | -     | -31% (-43.7 to -18.2) |
|                                        | • Usual care                    |            | Not reported |                                                                            | 48 hrs =77%                          |       |                       |
|                                        | • CDSS (MPC) use                |            | Not reported | Average glucose (mg/dl)                                                    | 48 hrs =117mg/dL                     | -     | -14mg/dL              |
|                                        | • Usual care                    |            | Not reported |                                                                            | 48 hrs =131 mg/dL                    |       |                       |
| <b>2. Blood coagulation management</b> |                                 |            |              |                                                                            |                                      |       |                       |
| Fitzmaurice et al, 2000                | • CDSS use                      | Nurses     | 122 adults   | proportion of tests in range                                               | Baseline=223/366<br>1 year =732/1181 | 1.1%  | -1.9% (-3.1 to -0.7)  |
|                                        | • CDSS non-use                  | Physicians | 245 adults   |                                                                            | Baseline=264/480<br>1 year =986/1700 | 3%    |                       |
|                                        | • CDSS use                      | Nurses     |              | International Normalised Ratio (INR) Results Within Range Point Prevalence | Baseline=74/118<br>1 year =86/121    | 8.4%  | -2.6% (-5.3 to -0.1)  |
|                                        | • CDSS non-use                  | Physicians |              |                                                                            | Baseline=129/244                     | 11%   |                       |



|                                                             |                     |                       |              |                                                  |                                    |       |                         |
|-------------------------------------------------------------|---------------------|-----------------------|--------------|--------------------------------------------------|------------------------------------|-------|-------------------------|
|                                                             |                     |                       |              |                                                  | 1 year =157/245                    |       |                         |
|                                                             | • CDSS use          | Nurses                |              | Time Spent Within INR Target Range               | Baseline=64/113<br>1 year =76/110  | 12%   | 7% (-0.7 to 14.7)       |
|                                                             | • CDSS non-use      | Physicians            |              |                                                  | Baseline=99/174<br>1 year= 143/230 | 5%    |                         |
| <b>3. Antenatal and peripartum care</b>                     |                     |                       |              |                                                  |                                    |       |                         |
| Dalaba et al, 2015                                          | • CDSS use          | Nurses                | Not reported | Antenatal complications per 1000 attendance      | Before=9<br>After =12              | 0.3%  | 0.3% (-0.03 to 0.6)     |
|                                                             | • CDSS non-use      | Nurses                | Not reported |                                                  | Before =16<br>After =16            | 0%    |                         |
|                                                             | • CDSS use          |                       |              | Delivery complications per 1000 attendances      | Before=107<br>After=96             | -0.9% | 2.4% (1.1 to 3.7)       |
|                                                             | • CDSS non-use      |                       |              |                                                  | Before=133<br>After=100            | -3.3% |                         |
| <b>4. Managing patients with chronic co-morbid diseases</b> |                     |                       |              |                                                  |                                    |       |                         |
| McDonald et al, 2017                                        | • CDSS use          | 165 Nurses            | 2550 adults  | Medication regimen complexity index <24.5        | Post-test=158/2550                 | -     | 0% (-1.1 to 1.1)        |
|                                                             | • Usual care        | 335 Nurses            | 5369 adults  |                                                  | Post-test =333/5369                |       |                         |
|                                                             | • CDSS use          | 165 Nurses            | 2550 adults  | Emergency room use                               | Post-test =421/2550                | -     | -0.2 (-1.9 to 1.6)      |
|                                                             | • Usual care        | 335 Nurses            | 5369 adults  |                                                  | Post-test =897/5369                |       |                         |
|                                                             | • CDSS use          | 165 Nurses            | 2550 adults  | Hospitalisation                                  | Post-test =502/2550                | -     | -1.4% (-3.3 to 0.5)     |
|                                                             | • Usual care        | 335 Nurses            | 5369 adults  |                                                  | Post-test =1133/5369               |       |                         |
| Lv et al, 2019                                              | • CDSS use          | Nurses                | 70 children  | Percentage of asthma exacerbations (mean and SD) | Baseline=9(4.3)<br>1 year=3(4.3)   | -     | -1 % (-3.7 to 1.7)      |
|                                                             | • Usual care        | Nurses                | 73 children  |                                                  | Baseline=9 (8.7)<br>1 year=4(4.4)  | -     |                         |
| <b>5. Outpatient obesity screening</b>                      |                     |                       |              |                                                  |                                    |       |                         |
| Lee et al, 2009                                             | • CDSS use          | 13 Nurses             | 807 adults   | Encounters with obesity related diagnosis        | 8 months =91/807                   | -     | 10.3% (8.0 to 12.5)     |
|                                                             | • Usual care        | 16 Nurses             | 997 adults   |                                                  | 8 months =10/997                   |       |                         |
|                                                             | • CDSS use          | 13 Nurses             | 807 adults   | Encounters with missed obesity-related diagnosis | 8 months =51/208                   | -     | -41.9% (-48.8 to -35.1) |
|                                                             | • Usual care        | 16 Nurses             | 997 adults   |                                                  | 8 months =440/662                  |       |                         |
| <b>6. Fall and pressure ulcer management</b>                |                     |                       |              |                                                  |                                    |       |                         |
| Beeckman et al, 2013                                        | • CDSS(Pre-vPlan)   | 65 Nurses and physios | 225 adults   | Pressure ulcer prevention                        | Day1=15/58<br>Day120=41/65         | 37.2% | 2.3% (-11.0 to 15.6)    |
|                                                             | • Standard protocol | 53 Nurses and physios | 239 adults   |                                                  | Day1=16/63<br>Day120=41/68         | 34.9% |                         |
|                                                             | • CDSS(Pre-vPlan)   | 65 Nurses and physios | 225 adults   | Prevalence of pressure                           | Day 1=34/225<br>Day120=16/225      | -8%   | -6.3% (-10.2 to -2.4)   |

|                      |                     |                       |                |                                              |                                              |       |                                     |
|----------------------|---------------------|-----------------------|----------------|----------------------------------------------|----------------------------------------------|-------|-------------------------------------|
|                      | • Standard protocol | 53 Nurses and physios | 239 adults     | ulcer                                        | Day1=39/239<br>Day120=35/239                 | -1.7% |                                     |
| Byrne,2005           | • CDSS use          | 89 Nurses             | Not reported   | Fall rate                                    | Before=0.312<br>After=0.318                  | 0.6%  | 3.1%                                |
|                      | • CDSS non-use      |                       | Not reported   |                                              | before=0.315<br>After=0.29                   | -2.5% |                                     |
|                      | • CDSS use          |                       | Not reported   | Pressure ulcer rate                          | Before=0.085<br>After=0.088                  | -0.3% | -0.6%                               |
|                      | • CDSS non-use      |                       | Not reported   |                                              | Before=0.091<br>After=0.094                  | 0.3%  |                                     |
| Dowding et al,2012   | • CDSS use          |                       |                | Fall rate                                    | Post-CDSS use Vs pre-CDSS use period         | -     | 0.91 (0.75 to 1.12) <sup>†</sup>    |
|                      | • CDSS non-use      |                       |                |                                              |                                              |       |                                     |
|                      | • CDSS use          |                       |                | HAPU ratio                                   | Post-CDSS use Vs pre-CDSS use period         | -     | 0.47 (0.25 to 0.85) <sup>†</sup>    |
|                      | • CDSS non-use      |                       |                |                                              |                                              |       |                                     |
| Dykes et al, 2009    | • CDSS use          | Nurses                | 5160 adults    | Fall rate difference (per 1000 patient days) | CDSS use Vs usual care                       | -     | -1.16 (-2.16 to -0.17) <sup>†</sup> |
|                      | • Usual care        | Nurses                | 5104 adults    |                                              |                                              |       |                                     |
| Dykes et al, 2020    | • UDSS use          | Nurses                | 19,283 adults  | Fall rate difference (per 1000 patient days) | Post-CDSS use Vs pre-CDSS use period         | -     | -0.15 (-0.04 to -0.25) <sup>†</sup> |
|                      | • CDSS non-use      | Nurses                | 17,948 adults  |                                              |                                              |       |                                     |
| Fossum et al,2011    | • CDSS use          | Nurses                | 367 adults     | Prevalence of pressure Ulcers                | Before=16/167<br>After=23/200                | 1.9%  | 4.2% (0.2 to 8.2)                   |
|                      | • CDSS non-use      | Nurses                | 274 adults     |                                              | Before=17/150<br>After=11/122                | -2.3% |                                     |
|                      | • CDSS use          |                       |                | Prevalence of malnutrition                   | Before=45/161<br>After=39/199                | -8.3% | -12.4% (-19.1 to -5.7)              |
|                      | • CDSS non-use      |                       |                |                                              | Before=31/148<br>After=30/120                | 4.1%  |                                     |
| <b>7. Triage</b>     |                     |                       |                |                                              |                                              |       |                                     |
| Bennett et al, 2016  | • CDSS use period   | Nurses                | 400 adults     | Correct triage prioritisation                | Post-test=85.2%<br>Pre-test=60.5%            | -     | 24.7% (18.8 to 30.6)                |
|                      | • CDSS non-use      | Nurses                | 400 adults     |                                              |                                              |       |                                     |
| Lattimer et al, 1998 | • CDSS              | Nurses                | Not applicable | Calls managed with telephone advice from GP  | Post-test =1109/7184<br>Post-test =3629/7308 | -     | -34.2% (-35.6 to -32.8)             |
|                      | • Usual care        | Physicians            | Not applicable |                                              |                                              |       |                                     |
|                      | • CDSS              | Nurses                |                | Patient attended primary care centre         | Post-test =1177/7184<br>Post-test =1934/7308 | -     | -10% (-11.4 to -8.8)                |
|                      | • Usual care        | Physicians            |                |                                              |                                              |       |                                     |
|                      | • CDSS              | Nurses                |                | Patient visited at home by duty GP           | Post-test =1317/7184<br>Post-test =1745/7308 | -     | -5.5% (-6.9 to -4.2)                |
|                      | • Usual care        | Physicians            |                |                                              |                                              |       |                                     |
| Lattimer et al, 2000 | • CDSS              | Nurses                |                | Total admissions within 3 days               | 1 year =428/7184<br>1 year =507/7308         | -     | -0.98% (-1.8 to -0.2)               |
|                      | • Usual care        | Physicians            |                |                                              |                                              |       |                                     |
| Snooks et al,        | • CDSS              | Paramedics            | 436 adults     | Patients left at scene                       | 1 year =183/436                              | -     | 5.2% (-1.7 to 12.1)                 |

1  
2  
3  
4  
5  
6  
7  
8  
9  
10  
11  
12  
13  
14  
15  
16  
17  
18  
19  
20  
21  
22  
23  
24  
25  
26  
27  
28  
29  
30  
31  
32  
33  
34  
35  
36  
37  
38  
39  
40  
41  
42  
43  
44  
45  
46

|                                                      |              |            |            |                                                                         |                    |   |                                     |
|------------------------------------------------------|--------------|------------|------------|-------------------------------------------------------------------------|--------------------|---|-------------------------------------|
| 2014                                                 |              | Paramedics |            | without conveyance to emergency department                              | 1 year =126/343    |   |                                     |
|                                                      | • Control    |            | 343 adults |                                                                         |                    |   |                                     |
|                                                      | • CDSS       |            | 436 adults | Patients with further emergency admission to hospital or death          | 1 year=69/436      | - | 1.5% (-3.5 to 6.6)                  |
|                                                      | • Control    |            | 343 adults |                                                                         | 1 year =49/343     |   |                                     |
|                                                      | • CDSS       |            |            | Patients with ED attendance or emergency admission to hospital or death | 1 year =92/436     | - | 3.3% (-2.3 to 8.9)                  |
|                                                      | • Control    |            |            |                                                                         | 1 year =61/343     |   |                                     |
|                                                      | • CDSS       |            |            | Patients who reported >1 further fall                                   | 1 year =135/236    | - | -6.8% (-16.3 to 2.7)                |
|                                                      | • Control    |            |            |                                                                         | 1 year =112/175    |   |                                     |
| <b>8. Quality of life and patients' satisfaction</b> |              |            |            |                                                                         |                    |   |                                     |
| Cleveringa et al,2010                                | • CDSS use   |            |            | Life-years gained                                                       | CDSS Vs usual care | - | 0.14 (-0.12 to 0.40) <sup>†</sup>   |
|                                                      | • Usual care |            |            |                                                                         |                    |   |                                     |
|                                                      | • CDSS use   |            |            | Healthy years (QALYs, discounted)                                       | CDSS Vs usual care |   | 0.037 (-0.066 to 0.14) <sup>†</sup> |
|                                                      | • Usual care |            |            |                                                                         |                    | - |                                     |
| Snooks et al, 2014                                   | • CDSS       | Paramedics | 239 adults | Quality of Life (SF12 MCS), mean (SD)                                   | 1 year =41.9(10.3) |   | -1 (-3.1 to 1.1)                    |
|                                                      | • Control    | Paramedics | 177 adults |                                                                         | 1 year =42.9(10.9) | - |                                     |
|                                                      | • CDSS       | Paramedics | 239 adults | Quality of Life (SF12 PCS), mean (SD)                                   | 1 year=29(8)       |   | -1 (-2.6 to 0.6)                    |
|                                                      | • Control    | Paramedics | 177 adults |                                                                         | 1 year=30(8.5)     | - |                                     |
|                                                      | • CDSS       | Paramedics | 228 adults | Patient satisfaction (QC Technical), mean (SD)                          | 1 year =97.8(10.7) |   | -0.4 (-2.4 to 1.6)                  |
|                                                      | • Control    | Paramedics | 165 adults |                                                                         | 1 year=98.2(9.4)   | - |                                     |

Note: ‡, calculated from reported information unless stated otherwise; †, as reported by study authors.

Supplementary Table 5: Summary of Health professionals' knowledge, beliefs and behaviour results

| Author & Year        | Interventions                  | Health professionals  | patient participants                     | Outcome measured                                                                   | Outcome values reported                     | Change of value within a group <sup>†</sup> | Mean or risk difference (95% CI) <sup>‡</sup> |
|----------------------|--------------------------------|-----------------------|------------------------------------------|------------------------------------------------------------------------------------|---------------------------------------------|---------------------------------------------|-----------------------------------------------|
| Beeckman et al, 2013 | • CDSS(Pre-vPlan)              | 65 Nurses and physios | 225 adults                               | Positive knowledge change                                                          | Baseline=28/65<br>5 months=26/50            | 8.9%                                        | 6.5% (0.8 to 13.2)                            |
|                      | • Standard protocol            | 53 Nurses and physios | 239 adults                               |                                                                                    | Baseline=21/53<br>5 months=16/38            | 2.4%                                        |                                               |
|                      | • CDSS(Pre-vPlan)              | 65 Nurses and physios | 225 adults                               | Positive attitude change                                                           | Baseline=48/65<br>5 months=42/50            | 10.2%                                       | 12.7% (5.9 to 19.5)                           |
|                      | • Standard protocol            | 53 Nurses and physios | 239 adults                               |                                                                                    | Baseline=39/53<br>5 months=27/38            | -2.5%                                       |                                               |
| Cortez, 2014         | • CDSS (drop-down boxes)       | 26 Nurses             | NA                                       | Research utilisation                                                               | Baseline=35%<br>11 weeks=38%                | 3%                                          | 9% (3.3 to 14.7)                              |
|                      | • Control                      | 24 Nurses             | NA                                       |                                                                                    | Baseline=19%<br>11 weeks=13%                | -6%                                         |                                               |
| Dumont et al,2012    | • CDSS use                     | Nurses (OA=44)        | 141 adults                               | Nurses satisfaction, out of 10 (mean (SD))                                         | 4 months=8.4(1.4)                           | -                                           | 3.6 (2.4 to 4.8)                              |
|                      | • Paper protocol               | Nurses                | 159 adults                               | perception of how often needed to deviate from the protocol, out of 10 (mean (SD)) | 4 months=4.8(2.4)                           | -                                           | -4.7 (-6.1 to -3.3)                           |
|                      | • CDSS use<br>• Paper protocol |                       |                                          |                                                                                    | 4 months=2.7(2.2)<br>4 months=7.4(2.4)      |                                             |                                               |
| Sassen et al,2014    | • CDSS use                     | 42 nurses and physios | Not reported                             | Behaviour, mean (SD)                                                               | Baseline=4.5 (1.02)<br>17 months=4.6 (0.85) | 0.1 (0.93)                                  | 0.1 (-0.32 to 0.53)                           |
|                      | • Control                      | 27 nurses and physios | Not reported                             |                                                                                    | baseline=4.8 (0.69)<br>17 months=4.8 (0.82) | 0 (0.75)                                    |                                               |
|                      | • CDSS use                     | 42 nurses and physios |                                          | Intention, mean (SD)                                                               | Baseline=6.3 (1.0)<br>17 months=6.1 (1.1)   | 0.2 (1.05)                                  | 0.3 (-0.22 to 0.82)                           |
|                      | • Control                      | 27 nurses and physios |                                          |                                                                                    | Baseline=5.9 (1.15)<br>17 months=6.0 (0.91) | -0.1(1.05)                                  |                                               |
|                      | • CDSS use                     | 42 nurses and physios |                                          | Attitude, mean (SD)                                                                | Baseline=6.3 (0.44)<br>17 months=6.3 (0.56) | 0.0(0.05)                                   | -0.1 (-0.13 to -0.07)                         |
|                      | • Control                      | 27 nurses and physios |                                          |                                                                                    | Baseline=6.2 (0.69)<br>17 months=6.3 (0.68) | 0.1 (0.09)                                  |                                               |
| • CDSS use           | 42 nurses and physios          |                       | Perceived behavioural control, mean (SD) | Baseline=4.7 (0.79)<br>17 months=5.0 (0.73)                                        | 0.3 (0.77)                                  | -0.1 (-0.49 to 0.29)                        |                                               |

|            |                       |                             |                                             |             |                     |
|------------|-----------------------|-----------------------------|---------------------------------------------|-------------|---------------------|
| • Control  | 27 nurses and physios |                             | Baseline=4.9 (0.87)<br>17 months=5.3 (0.8)  | 0.4 (0.85)  |                     |
| • CDSS use | 42 nurses and physios | Subjective norms, mean (SD) | Baseline=5.5 (0.55)<br>17 months=5.6 (0.63) | 0.1 (0.59)  | 0 (0.34 to 0.34)    |
| • Control  | 27 nurses and physios |                             | Baseline=5.6 (0.93)<br>17 months=5.7 (0.76) | 0.1 (0.84)  |                     |
| • CDSS use | 42 nurses and physios | Moral norms, mean (SD)      | Baseline=6.0 (0.63)<br>17 months=6.2 (0.7)  | 0.2 (0.67)  | 0.1 (-0.21 to 0.41) |
| • Control  | 27 nurses and physios |                             | Baseline=6.2 (0.59)<br>17 months=6.3 (0.55) | 0.1 (0.57)  |                     |
| • CDSS use | 42 nurses and physios | Barriers, mean (SD)         | Baseline=3.1 (1.17)<br>17 months=3.2 (1.12) | 0.1 (1.14)  | 0.3 (-0.23 to 0.83) |
| • Control  | 27 nurses and physios |                             | Baseline=2.8 (1.01)<br>17 months=2.6 (0.96) | -0.2 (0.98) |                     |

Note: ‡, calculated from reported information unless stated otherwise; †, as reported by study authors.

Supplementary Table 6: Summary of adverse events results

| Author & Year          | Interventions                   | Health professionals | patient participants | Outcome measured                | Outcome values reported | Risk difference (95% CI) <sup>‡</sup> |
|------------------------|---------------------------------|----------------------|----------------------|---------------------------------|-------------------------|---------------------------------------|
| Cleveringa et al,2010  | • CDSS use in diabetic patients | Nurses               | 1699 adults          | cardiovascular events occurring | CDSS Vs usual care      | -11% (-18 to -4) <sup>†</sup>         |
|                        | • Usual care                    | Nurses               | 1692 adults          |                                 |                         |                                       |
| Fitzmaurice et al,2000 | • CDSS Nurse                    | Nurses               | 224 adults           | Serious adverse reaction events | 1 year =3 (1.3%)        | -5.7% (-10.1 to -1.2)                 |
|                        | • CDSS non-use                  | Physicians           | 143 adults           |                                 | 1 year =10 (7%)         |                                       |
|                        | • CDSS Nurse                    | Nurses               | 224 adults           | Deaths                          | 1 year =3 (1.3%)        |                                       |
|                        | • CDSS non-use                  | Physicians           | 143 adults           |                                 | 1 year =9 (6.3%)        |                                       |
| Snooks et al, 2014     | CDSS<br>Control                 | 17 Paramedics        | 436 adults           | Patients dying                  | 1 year =19/436 (4.4%)   | 1.2% (-1.5 to 3.8)                    |
|                        |                                 | 19 Paramedics        | 343 adults           |                                 | 1 year=11/343 (3.2%)    |                                       |

Note: ‡, calculated from reported information unless stated otherwise; †, as reported by study authors.

Supplementary Table 7: Summary of economic costs and consequences results

| Author & Year          | Interventions        | Health professionals | patient participants | Outcome measured                                        | Outcome values reported                         | Difference (95% CI) <sup>†</sup>      |                                          |
|------------------------|----------------------|----------------------|----------------------|---------------------------------------------------------|-------------------------------------------------|---------------------------------------|------------------------------------------|
| Cleveringa et al, 2010 | • CDSS use           | Nurses               |                      | Diabetes-related costs (excluding CHD)-€ discounted     | CDSS Vs usual care                              | 1,698.00 (187 to 3,209) <sup>†</sup>  |                                          |
|                        | • Usual care         | Nurses               |                      |                                                         |                                                 |                                       |                                          |
|                        | • CDSS use           |                      |                      | Cardiovascular disease cost-€ discounted                | CDSS Vs usual care                              | -587.00 (-880 to -294) <sup>†</sup>   |                                          |
|                        | • Usual care         |                      |                      |                                                         |                                                 |                                       |                                          |
|                        | • CDSS use           |                      |                      | Diabetic care protocol cost-€ discounted                | CDSS Vs usual care                              | 316.00 (315 to 318) <sup>†</sup>      |                                          |
|                        | • Usual care         |                      |                      |                                                         |                                                 |                                       |                                          |
|                        | • CDSS use           |                      |                      | Total cost-€ discounted                                 | CDSS Vs usual care                              | 1,415.00 (-130 to 2,961) <sup>†</sup> |                                          |
|                        | • Usual care         |                      |                      |                                                         |                                                 |                                       |                                          |
|                        | • CDSS use           |                      |                      | Total costs per QALY gained (Euro)                      | CDSS Vs usual care                              | 38,243.00 <sup>†</sup>                |                                          |
|                        | • Usual care         |                      |                      |                                                         |                                                 |                                       |                                          |
|                        | Guerts et al, 2017   | • CDSS use           | Nurses               | 113 children                                            | Average emergency department visit costs (Euro) | 156.4                                 | 0.00                                     |
|                        |                      | • Usual care         | Nurses               | 109 children                                            |                                                 | 156.4                                 |                                          |
| • CDSS use             |                      |                      |                      | Average diagnostics cost (Euro)                         | 1.09                                            | -0.46                                 |                                          |
| • Usual care           |                      |                      |                      |                                                         | 1.55                                            |                                       |                                          |
| • CDSS use             |                      |                      |                      | Average treatment cost (Euro)                           | 4.48                                            | 1.90                                  |                                          |
| • Usual care           |                      |                      |                      |                                                         | 2.58                                            |                                       |                                          |
| • CDSS use             |                      |                      |                      | Average follow-up/hospitalization (Euro)                | 134.                                            | 26.60                                 |                                          |
| • Usual care           |                      |                      |                      |                                                         | 107.4                                           |                                       |                                          |
| • CDSS use             |                      |                      |                      | Average costs of missed diagnoses/adverse events (Euro) | 49.70                                           | -32.10                                |                                          |
| • Usual care           |                      |                      |                      |                                                         | 81.8                                            |                                       |                                          |
|                        | • CDSS use           |                      |                      | Average cost of CDSS implementation (Euro)              | 61.95                                           | 61.95                                 |                                          |
|                        | • Usual care         |                      |                      |                                                         | 0.0                                             |                                       |                                          |
|                        | • CDSS use           |                      |                      | Overall average cost                                    | 408                                             | 58.00                                 |                                          |
|                        | • Usual care         |                      |                      |                                                         | 350                                             |                                       |                                          |
|                        | Lattimer et al, 2000 | • CDSS               | Nurses               | Not applicable                                          | Net savings [of CDSS use] in a year (£)         | CDSS Vs usual care                    | 13,185 (-77,509 to 123,824) <sup>†</sup> |
|                        |                      | • Usual care         | Physicians           | Not applicable                                          |                                                 |                                       |                                          |
| • CDSS                 |                      |                      |                      | Cost saved from inpatient stay                          | CDSS Vs usual care                              | 51,059 <sup>†</sup>                   |                                          |
|                        | • Usual care         |                      |                      |                                                         |                                                 |                                       |                                          |
|                        | Snooks et al, 2014   | • CDSS               | Paramedics           | Implementing cost of CCDS in one month (in 100s £)      | 74                                              | 74                                    |                                          |
|                        |                      | • Control            | Paramedics           |                                                         |                                                 |                                       |                                          |
|                        |                      | • CDSS               |                      | Total cost of implementation in one month (in 100s £)   | 2,773                                           | 247 (-247 to 741) <sup>†</sup>        |                                          |
| • Control              |                      |                      | 2,526                |                                                         |                                                 |                                       |                                          |
| • CDSS                 |                      | Net resources saved  |                      | 39 <sup>†</sup>                                         |                                                 |                                       |                                          |

|           |                                  |                 |                                       |
|-----------|----------------------------------|-----------------|---------------------------------------|
| • Control | by CDSS per patient year (£)     |                 |                                       |
| • CDSS    | Net cost resources saved by CCDS |                 | 208-308 <sup>†</sup>                  |
| • Control | per patient year (£)             |                 |                                       |
| • CDSS    | Mean length of Job cycle time    | CDSS Vs control | 8.9 min (2.3 to 15.3) <sup>†</sup>    |
| • Control | (minutes)                        |                 |                                       |
| • CDSS    | Mean length of episode of care   | CDSS Vs control | -5.7 min (-38.5 to 27.2) <sup>†</sup> |
| • Control | (minutes)                        |                 |                                       |

Note: ‡, calculated from reported information unless stated otherwise; †, as reported by study authors; PCS, physical component summary; MCS, mental component summary; SF, Short-Form

For peer review only



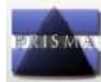

# PRISMA 2009 Checklist

| Section/topic                      | #  | Checklist item                                                                                                                                                                                                                                                                                              | Reported on page # |
|------------------------------------|----|-------------------------------------------------------------------------------------------------------------------------------------------------------------------------------------------------------------------------------------------------------------------------------------------------------------|--------------------|
| <b>TITLE</b>                       |    |                                                                                                                                                                                                                                                                                                             |                    |
| Title                              | 1  | Identify the report as a systematic review, meta-analysis, or both.                                                                                                                                                                                                                                         | 1                  |
| <b>ABSTRACT</b>                    |    |                                                                                                                                                                                                                                                                                                             |                    |
| Structured summary                 | 2  | Provide a structured summary including, as applicable: background; objectives; data sources; study eligibility criteria, participants, and interventions; study appraisal and synthesis methods; results; limitations; conclusions and implications of key findings; systematic review registration number. | 2                  |
| <b>INTRODUCTION</b>                |    |                                                                                                                                                                                                                                                                                                             |                    |
| Rationale                          | 3  | Describe the rationale for the review in the context of what is already known.                                                                                                                                                                                                                              | 3                  |
| Objectives                         | 4  | Provide an explicit statement of questions being addressed with reference to participants, interventions, comparisons, outcomes, and study design (PICOS).                                                                                                                                                  | 3                  |
| <b>METHODS</b>                     |    |                                                                                                                                                                                                                                                                                                             |                    |
| Protocol and registration          | 5  | Indicate if a review protocol exists, if and where it can be accessed (e.g., Web address), and, if available, provide registration information including registration number.                                                                                                                               | 3                  |
| Eligibility criteria               | 6  | Specify study characteristics (e.g., PICOS, length of follow-up) and report characteristics (e.g., years considered, language, publication status) used as criteria for eligibility, giving rationale.                                                                                                      | 3-4                |
| Information sources                | 7  | Describe all information sources (e.g., databases with dates of coverage, contact with study authors to identify additional studies) in the search and date last searched.                                                                                                                                  | 3-4                |
| Search                             | 8  | Present full electronic search strategy for at least one database, including any limits used, such that it could be repeated.                                                                                                                                                                               | 3-4                |
| Study selection                    | 9  | State the process for selecting studies (i.e., screening, eligibility, included in systematic review, and, if applicable, included in the meta-analysis).                                                                                                                                                   | 4                  |
| Data collection process            | 10 | Describe method of data extraction from reports (e.g., piloted forms, independently, in duplicate) and any processes for obtaining and confirming data from investigators.                                                                                                                                  |                    |
| Data items                         | 11 | List and define all variables for which data were sought (e.g., PICOS, funding sources) and any assumptions and simplifications made.                                                                                                                                                                       | 4,17               |
| Risk of bias in individual studies | 12 | Describe methods used for assessing risk of bias of individual studies (including specification of whether this was done at the study or outcome level), and how this information is to be used in any data synthesis.                                                                                      | 4                  |
| Summary measures                   | 13 | State the principal summary measures (e.g., risk ratio, difference in means).                                                                                                                                                                                                                               | 5                  |
| Synthesis of results               | 14 | Describe the methods of handling data and combining results of studies, if done, including measures of consistency (e.g., I <sup>2</sup> ) for each meta-analysis.                                                                                                                                          | 5                  |

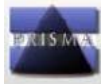

# PRISMA 2009 Checklist

Page 1 of 2

| Section/topic                 | #  | Checklist item                                                                                                                                                                                           | Reported on page # |
|-------------------------------|----|----------------------------------------------------------------------------------------------------------------------------------------------------------------------------------------------------------|--------------------|
| Risk of bias across studies   | 15 | Specify any assessment of risk of bias that may affect the cumulative evidence (e.g., publication bias, selective reporting within studies).                                                             | NA                 |
| Additional analyses           | 16 | Describe methods of additional analyses (e.g., sensitivity or subgroup analyses, meta-regression), if done, indicating which were pre-specified.                                                         | NA                 |
| <b>RESULTS</b>                |    |                                                                                                                                                                                                          |                    |
| Study selection               | 17 | Give numbers of studies screened, assessed for eligibility, and included in the review, with reasons for exclusions at each stage, ideally with a flow diagram.                                          | 5-6                |
| Study characteristics         | 18 | For each study, present characteristics for which data were extracted (e.g., study size, PICOS, follow-up period) and provide the citations.                                                             | 8-10               |
| Risk of bias within studies   | 19 | Present data on risk of bias of each study and, if available, any outcome level assessment (see item 12).                                                                                                | NA                 |
| Results of individual studies | 20 | For all outcomes considered (benefits or harms), present, for each study: (a) simple summary data for each intervention group (b) effect estimates and confidence intervals, ideally with a forest plot. | 11-14              |
| Synthesis of results          | 21 | Present results of each meta-analysis done, including confidence intervals and measures of consistency.                                                                                                  | NA                 |
| Risk of bias across studies   | 22 | Present results of any assessment of risk of bias across studies (see Item 15).                                                                                                                          | NA                 |
| Additional analysis           | 23 | Give results of additional analyses, if done (e.g., sensitivity or subgroup analyses, meta-regression [see Item 16]).                                                                                    | NA                 |
| <b>DISCUSSION</b>             |    |                                                                                                                                                                                                          |                    |
| Summary of evidence           | 24 | Summarize the main findings including the strength of evidence for each main outcome; consider their relevance to key groups (e.g., healthcare providers, users, and policy makers).                     | 14-17              |
| Limitations                   | 25 | Discuss limitations at study and outcome level (e.g., risk of bias), and at review-level (e.g., incomplete retrieval of identified research, reporting bias).                                            | 17                 |
| Conclusions                   | 26 | Provide a general interpretation of the results in the context of other evidence, and implications for future research.                                                                                  | 17                 |
| <b>FUNDING</b>                |    |                                                                                                                                                                                                          |                    |
| Funding                       | 27 | Describe sources of funding for the systematic review and other support (e.g., supply of data); role of funders for the systematic review.                                                               | 17                 |

From: Moher D, Liberati A, Tetzlaff J, Altman DG, The PRISMA Group (2009). Preferred Reporting Items for Systematic Reviews and Meta-Analyses: The PRISMA Statement. PLoS Med 6(7): e1000097. doi:10.1371/journal.pmed1000097

For more information, visit: [www.prisma-statement.org](http://www.prisma-statement.org).

Page 2 of 2

For peer review only - <http://bmjopen.bmj.com/site/about/guidelines.xhtml>

# BMJ Open

## Effects of computerised clinical decision support systems (CDSS) on nursing and allied health professional performance and patient outcomes: A systematic review

|                                 |                                                                                                                                                                                                                                                                                                                                                                                                                                                                                                                                                                                                                                                                                             |
|---------------------------------|---------------------------------------------------------------------------------------------------------------------------------------------------------------------------------------------------------------------------------------------------------------------------------------------------------------------------------------------------------------------------------------------------------------------------------------------------------------------------------------------------------------------------------------------------------------------------------------------------------------------------------------------------------------------------------------------|
| Journal:                        | <i>BMJ Open</i>                                                                                                                                                                                                                                                                                                                                                                                                                                                                                                                                                                                                                                                                             |
| Manuscript ID                   | bmjopen-2021-053886.R1                                                                                                                                                                                                                                                                                                                                                                                                                                                                                                                                                                                                                                                                      |
| Article Type:                   | Original research                                                                                                                                                                                                                                                                                                                                                                                                                                                                                                                                                                                                                                                                           |
| Date Submitted by the Author:   | 26-Sep-2021                                                                                                                                                                                                                                                                                                                                                                                                                                                                                                                                                                                                                                                                                 |
| Complete List of Authors:       | Mebrahtu, Teumzghi; University of Leeds, School of computing<br>Skyrme, Sarah; University of Leeds, School of Healthcare<br>Randell, Rebecca; University of Bradford, Faculty of Health Studies;<br>Wolfson Centre for Applied Health Research<br>Keenan, Anne-Maree; University of Leeds, School of Healthcare<br>Bloor, Karen; University of York, Department of Health Sciences<br>Yang, Huiqin; University of Leeds, School of Healthcare<br>Andre, Deirdre; University of Leeds, Library Services<br>Ledward, Alison; University of Leeds, School of Healthcare<br>King, Henry; University of Leeds, School of Healthcare<br>Thompson, Carl; University of Leeds, School of Healthcare |
| <b>Primary Subject Heading</b>: | Health informatics                                                                                                                                                                                                                                                                                                                                                                                                                                                                                                                                                                                                                                                                          |
| Secondary Subject Heading:      | Health policy                                                                                                                                                                                                                                                                                                                                                                                                                                                                                                                                                                                                                                                                               |
| Keywords:                       | Health informatics < BIOTECHNOLOGY & BIOINFORMATICS, Information technology < BIOTECHNOLOGY & BIOINFORMATICS, Information management < BIOTECHNOLOGY & BIOINFORMATICS                                                                                                                                                                                                                                                                                                                                                                                                                                                                                                                       |
|                                 |                                                                                                                                                                                                                                                                                                                                                                                                                                                                                                                                                                                                                                                                                             |

SCHOLARONE™  
Manuscripts



I, the Submitting Author has the right to grant and does grant on behalf of all authors of the Work (as defined in the below author licence), an exclusive licence and/or a non-exclusive licence for contributions from authors who are: i) UK Crown employees; ii) where BMJ has agreed a CC-BY licence shall apply, and/or iii) in accordance with the terms applicable for US Federal Government officers or employees acting as part of their official duties; on a worldwide, perpetual, irrevocable, royalty-free basis to BMJ Publishing Group Ltd ("BMJ") its licensees and where the relevant Journal is co-owned by BMJ to the co-owners of the Journal, to publish the Work in this journal and any other BMJ products and to exploit all rights, as set out in our [licence](#).

The Submitting Author accepts and understands that any supply made under these terms is made by BMJ to the Submitting Author unless you are acting as an employee on behalf of your employer or a postgraduate student of an affiliated institution which is paying any applicable article publishing charge ("APC") for Open Access articles. Where the Submitting Author wishes to make the Work available on an Open Access basis (and intends to pay the relevant APC), the terms of reuse of such Open Access shall be governed by a Creative Commons licence – details of these licences and which [Creative Commons](#) licence will apply to this Work are set out in our licence referred to above.

Other than as permitted in any relevant BMJ Author's Self Archiving Policies, I confirm this Work has not been accepted for publication elsewhere, is not being considered for publication elsewhere and does not duplicate material already published. I confirm all authors consent to publication of this Work and authorise the granting of this licence.

1  
2  
3 **Effects of computerised clinical decision support systems (CDSS) on nursing and allied**  
4 **health professional performance and patient outcomes: A systematic review**  
5  
6  
7

8 Mebrahtu TF<sup>1\*</sup>, Skyrme S<sup>2</sup>, Randell R<sup>3</sup>, Keenan AM<sup>2</sup>, Bloor K<sup>4</sup>, Yang H<sup>2</sup>, Andre D<sup>5</sup>, Ledward A<sup>2</sup>, King H<sup>2</sup>,  
9 Thompson CA<sup>2</sup>  
10  
11  
12

13  
14 <sup>1</sup>School of Computing, Faculty of Engineering and Physical Sciences, University of Leeds, Leeds, UK

15  
16 <sup>2</sup>School of Healthcare, University of Leeds, Leeds, UK

17  
18 <sup>3</sup> Faculty of Health Studies, University of Bradford, Bradford, UK; Wolfson Centre for Applied Health  
19 Research, Bradford, UK

20  
21 <sup>4</sup>Department of Health Sciences, University of York, York, UK

22  
23 <sup>5</sup> Library Services, University of Leeds, Leeds, UK.  
24  
25

26  
27 **\*corresponding author:** [t.f.mebrahtu@leeds.ac.uk](mailto:t.f.mebrahtu@leeds.ac.uk); School of Computing, Faculty of Engineering  
28 and Physical Sciences, University of Leeds, Leeds, LS2 9JT  
29  
30  
31  
32  
33  
34  
35  
36

37 **Keywords:** decision support; nursing; allied health professionals; CDSS; decision making  
38  
39  
40  
41  
42  
43  
44  
45

46 Word count:

47 Abstract=372

48 Main text=4247  
49  
50  
51  
52  
53  
54  
55  
56  
57  
58  
59  
60

**ABSTRACT**

**Objective:** Computerised clinical decision support systems (CDSS) are an increasingly important part of nurse and allied health professional (AHP) roles in delivering healthcare. The impact of these technologies on these health professionals' performance and patient outcomes has not been systematically reviewed. We aimed to conduct a systematic review to investigate this.

**Materials and Methods:** The following bibliographic databases and grey literature sources were searched by an experienced Information Professional for published and unpublished research from inception to February 2021 without language restrictions: MEDLINE(Ovid) , Embase Classic+Embase (Ovid), PsycINFO (Ovid), HMIC (Ovid), AMED (Allied and Complementary Medicine) (Ovid) , CINAHL (EBSCO), Cochrane Central Register of Controlled Trials (Wiley, Cochrane Database of Systematic Reviews (Wiley), Social Sciences Citation Index Expanded (Clarivate), ProQuest Dissertations & Theses Abstracts & Index, ProQuest ASSIA (Applied Social Science Index and Abstract), Clinical Trials.gov, World Health Organisation International Clinical Trials Registry (ICTRP), Health Services Research Projects in Progress (HSRProj), OpenClinical([www.OpenClinical.org](http://www.OpenClinical.org)), OpenGrey ( [www.opengrey.eu](http://www.opengrey.eu)), Health.IT.gov, Agency for Healthcare Research and Quality ([www.ahrq.gov](http://www.ahrq.gov) ). Any comparative research studies comparing CDSS with usual care were eligible for inclusion.

**Results:** A total of 36,106 non-duplicate records were identified. Of 35 included studies: 28 were randomised trials, three controlled-before-and-after studies, three interrupted-time-series and one non-randomised trial. There were ~1,318 health professionals and ~67,595 patient participants in the studies. Most studies focused on nurse decision makers (71%) or paramedics (5.7%). CDSS as a standalone Personal Computer (PC)/LAPTOP-technology was a feature of 88.7% of the studies; only 8.6% of the studies involved "smart" mobile/handheld-technology.

**Discussion:** CDSS impacted 38% of the outcome measures used positively. Care processes were better in 47% of the measures adopted; Examples included, nurses' adherence to hand disinfection guidance, insulin dosing, on-time blood sampling, and documenting care. Patient care outcomes in 40.7% of

1  
2  
3 indicators were better; examples included, lower numbers of falls and pressure ulcers, better  
4  
5 glycaemic control, screening of malnutrition and obesity, and triaging appropriateness.  
6  
7

8 **Conclusion:** CDSS may have a positive impact on selected aspects of nurses' and AHPs' performance  
9  
10 and care outcomes. However, comparative research is generally low quality, with a wide range of  
11  
12 heterogeneous outcomes. After more than 13 years of synthesised research into CDSS in healthcare  
13  
14 professions other than medicine, the need for better quality evaluative research remains as pressing.  
15  
16  
17  
18  
19

20  
21 **Strengths and limitations of the review:**

- 22  
23  
24  
25  
26  
27  
28  
29  
30  
31  
32  
33  
34  
35  
36  
37  
38  
39  
40  
41  
42  
43  
44  
45  
46  
47  
48  
49  
50  
51  
52  
53  
54  
55  
56  
57  
58  
59  
60
- The review is based on a comprehensive literature search
  - This is the first systematic review of CDSS influence on nursing and AHP performance and outcomes
  - Allied Health Professionals are under-represented, with a primary focus on paramedics and physiotherapists
  - The number of studies, service users/patients, and health professionals involved was sizable, but outcomes were too heterogeneous to aggregate
  - The overall quality of comparative research represented by the included studies was poor.

## INTRODUCTION

Nurses and allied health professionals' (AHPs') judgements and decisions commit financial, human, and technical resources to care in health systems.<sup>1</sup> To support decision making and underpin new roles and ways of delivering services, such as nurse-led primary care,<sup>1</sup> computerised clinical decision support systems (CDSS) have been developed to tailor evidence-based advice provided to clinicians at the point of decision making.

CDSS can improve professional performance by making the basis for decisions explicit; widening available information, encouraging more consistent decisions and thus reducing unwarranted variation in processes and patient outcomes.<sup>2-3</sup> Negatively, CDSS could encourage a focus on unimportant problems, hinder care delivery and contribute to a widening of (digital) inequalities.<sup>4-6</sup>

Reviews focusing mainly on doctors suggest CDSS effects on performance and outcomes are inconsistent<sup>7</sup> but improved care processes<sup>8-9</sup> and reduced morbidity<sup>8</sup> and mortality<sup>10</sup> are possible. These reviews, however, often neglect the multi-disciplinary nature of healthcare delivery and the decisions involved.

Previously synthesised studies of nurses' use of CDSS suggest only limited impact on performance and health outcomes.<sup>11</sup> Digital technology and research evidence have both developed significantly since this review was undertaken. In this review we aim to examine the impact of CDSS on nurses' and allied health professionals' (AHPs) performance and patient outcomes.

## REVIEW METHODS

Following best practice principles<sup>12-13</sup> we undertook a systematic review of research into CDSS targeting nurse and AHP decision makers. The protocol was registered with PROSPERO<sup>14</sup> [number: CRD42019147773].

### Literature searching

Initial searches were conducted in November 2019 and updated on 12 February 2021. Searches were not restricted by language. See Supplementary Table 1 for search terms.



1  
2  
3 We searched: MEDLINE(Ovid) , Embase Classic+Embase (Ovid), PsycINFO (Ovid), Health Management  
4 Information Consortium (HMIC) (Ovid), AMED (Allied and Complementary Medicine) (Ovid) , CINAHL  
5 , Cochrane Central Register of Controlled Trials (Wiley, Cochrane Database of Systematic Reviews  
6 (Wiley), Social Sciences Citation Index Expanded (Clarivate), ProQuest Dissertations & Theses  
7 Abstracts & Index, ProQuest ASSIA (Applied Social Science Index and Abstract), Clinical Trials.gov,  
8 World Health Organisation International Clinical Trials Registry (ICTRP), Health Services Research  
9 Projects in Progress (HSRProj), OpenClinical([www.OpenClinical.org](http://www.OpenClinical.org)), OpenGrey ( [www.opengrey.eu](http://www.opengrey.eu)),  
10 Health.IT.gov, Agency for Healthcare Research and Quality ([www.ahrq.gov](http://www.ahrq.gov) ).

### 21 **Study inclusion and exclusion**

22 All titles and abstracts were imported into a reference management database (EndNote) and  
23 duplicates removed. Covidence review production toolkit ([www.covidence.org](http://www.covidence.org)) was used to manage  
24 screening, data extraction and organising of the review and ensure efficient production. After  
25 removing duplicate titles and abstracts, seven reviewers (AK, CT, HY, HK RR, SS and TM) independently  
26 screened all titles and abstracts. TM first-screened titles and abstracts for all studies, the other six  
27 authors then second-screened 16.7% of the studies each. Records with decision disagreements were  
28 revisited by two authors (TM and CT) and resolved by consensus, a third reviewer (RR) was available  
29 for further disagreements although none occurred. Two reviewers (CT and TM) independently  
30 assessed study relevance using Cochrane Collaboration's Effective Practice and Organisation of Care  
31 (EPOC) criteria;<sup>15</sup> and, conducted full-text screening. Any disagreements were resolved by consensus.  
32  
33 Comparative studies (randomised controlled trials (RCTs), non-randomised trials, controlled before-  
34 after (CBA) studies, interrupted time series (ITS) studies and repeated measures studies) comparing  
35 CDSS against usual care (i.e., clinical decision making unsupported by CDSS) were eligible for  
36 inclusion.

### 56 **Participants**

1  
2  
3 Studies that evaluate the effects of CDSS used by **nurses [including midwives] and AHPs** and report  
4 professional performance and patient outcomes were eligible for inclusion.  
5  
6  
7

### 8 **Interventions**

9  
10  
11 The eligible intervention in this review was the use of **any form of CDSS to aid clinical decision**  
12 **making.**  
13  
14

### 15 **Comparator**

16  
17  
18 The comparator was **usual care**; defined as **clinical practice where clinical decision making is**  
19 **unsupported by CDSS.**  
20  
21  
22

### 23 **Outcomes**

24  
25 Our primary outcome was **adherence of nurses and AHPs to evidence-based recommendations.**  
26  
27 Secondary outcomes were *diagnostic accuracy, time to reach judgment, adverse events, health*  
28 *professional satisfaction, and system and/or implementation costs and benefits.*  
29  
30  
31  
32

### 33 **Data extraction**

34  
35 Data on study characteristics and outcomes were independently extracted by two reviewers (CT and  
36 TM) using the EPOC standard data collection form.<sup>16</sup>  
37  
38  
39

### 40 **Quality assessment**

41  
42 Study quality and risk of bias was assessed independently by CT and TM using Cochrane Handbook for  
43 Systematic Reviews of Interventions<sup>17</sup> and EPOC guidelines.<sup>18</sup>  
44  
45  
46

47 Each potential source of bias was judged as high, low, or unclear, and an overall 'risk of bias'  
48 classification (high, moderate, or low) assigned to each included study.<sup>17</sup> Studies with low risk of bias  
49 in all domains, or where bias was unlikely to fundamentally alter results, were treated as low risk.  
50 Studies with bias risk in at least one domain, or where bias might alter conclusions, were treated as  
51 unclear. Studies with a high risk of bias in at least one domain, or with a serious bias likely to reduce  
52 the certainty of conclusions, were considered high risk.  
53  
54  
55  
56  
57  
58  
59  
60

## Data synthesis

Findings were synthesised narratively, regardless of statistical analysis in the primary study. Studies were grouped by i) similarity in focus or CDSS-type (knowledge based or machine learning), ii) health professionals targeted, iii) patient group, iv) outcomes reported, and, v) study design.

If not reported, we calculated absolute risks from the primary research. Risk differences and 95% confidence intervals were then calculated from these. Because the CDSS, participants, and underlying research questions were so heterogeneous no meta-analysis was undertaken.<sup>19</sup>

## RESULTS

### Evidence Quantity

From 36,106 non-duplicate records identified, 35,858 records were excluded after title and abstract screening. Seven records were identified through forward citation searching. Full text screening was undertaken on 255 records which led to 220 more records being excluded. Thirty-five studies were included in the review.<sup>20-51</sup> **Figure 1** illustrates study selection.

### Study Descriptions

The 35 included studies comprised 28 RCTs (80%), three CBA studies (8.6%), three ITS (8.6%) and one non-randomised trial (2.8%). Thirty-two studies (91.4%) were peer-reviewed journal articles and three (8.6%) were PhD theses. The public sector funded 74.3% of studies; industry, 5.7%; 17.1% failed to declare funding and 2.9% were unfunded. Most studies were published after 2010 (n=29, 82.9%) with just two studies during 1997-1999 and 14 (40.0%) in 2000-2010. Sixteen studies (45.6%) were published after the last significant systematic review on CDSS for nurses' performance and health outcomes.<sup>11</sup> Circa 1,318 health professionals and 67,595 patients were study participants, mainly in hospital-based studies (57.1%). Primary care accounted for 17.1% and nursing homes 11.4% of studies. Western health systems provided the dominant context: US (28.6%); UK (20.0%), Netherlands (17.2%), Czech Republic and Norway (5.7%) each. With single study representation (2.8%) from Belgium, Brazil,

1  
2  
3 China, Ghana, Norway, Sweden, Turkey and one multicentre (Austria, Czech Republic, and UK) report.

4  
5 See **Table 1**.

6  
7  
8 Only one study (of 35) reported explicit theory to guide implementation of the CDSS. Almost a third  
9 (28%) published their study protocol – none of which discussed theory-influenced implementation.

10  
11  
12  
13 Nurses made up the target for the CDSS *and* control groups in 25 (71.4%) studies; paramedics in two  
14 (5.7%) studies. Five studies (14.3%) compared nurses in the intervention (CDSS) group with physicians  
15 in the control. Two studies (5.7%) recruited a combination of nurses and physiotherapists for CDSS  
16 and control groups. Thirty-one studies (88.7%) used a standalone (physically, even when integrated in  
17 an electronic health record) computer-based CDSS; three (8.6%) used handheld/mobile-based  
18 technologies, and just one study (0.2%) used a web-based CDSS. CDSS were mostly designed with a  
19 single function in mind (e.g., disease diagnosis), but some addressed multiple parts of clinical  
20 pathways (e.g., disease diagnosis *and* disease management).  
21  
22  
23  
24  
25  
26  
27  
28  
29  
30

### 31 32 **Quality of identified evidence**

33  
34 Except for three RCTs scored as 'Unclear', all studies were at 'high' overall risk of bias. On average,  
35 RCTs scored 'Low' risk of bias in five of nine domains; CBA studies were lower, with four domains;  
36 non-randomised studies scored 'low' for a single domain. The three ITS studies were 'Low' risk of  
37 bias in six (of seven) domains. Evidence quality did not change over time (see Supplementary Table  
38  
39  
40  
41  
42  
43 2).

**Table 1 Baseline characteristics of included studies**

| Author and year         | Country        | Design | Setting                                               | Study duration | Healthcare professionals (HP) | Outcomes                                                                                |
|-------------------------|----------------|--------|-------------------------------------------------------|----------------|-------------------------------|-----------------------------------------------------------------------------------------|
| Beeckman et al, 2013    | Belgium        | RCT    | Nursing homes                                         | 5 months       | Nurses and physios            | Risk of pressure ulcers; HP knowledge and attitude                                      |
| Bennet et al, 2016      | UK             | ITS    | Emergency department, district general hospital       | 1 year         | Nurses                        | Triage prioritization; pain assessment and management; management of neutropenic sepsis |
| Blaha et al, 2009       | Czech Republic | RCT    | ICU post elective cardiac surgery university hospital | 48 hours       | Nurses                        | Intensive care glycaemic control/diabetes                                               |
| Byrne, 2005             | USA            | CBA    | Nursing homes                                         | 33 months      | Nurses                        | Falls and pressure ulcer reduction (assessment and prevention)                          |
| Canbolat et al, 2019    | Turkey         | Non-RT | ICU university general hospital                       | 22 months      | Nurses [and physicians]       | ICU glycaemic control                                                                   |
| Cavalcanti et al, 2009  | Brazil         | RCT    | ICU general hospital                                  | 19 months      | Nurses                        | ICU glycaemic control                                                                   |
| Cleveringa et al, 2008  | Netherlands    | RCT    | Primary care practices                                | 1 year         | Nurses [and physicians]       | Management and prevention of diabetes (and CV risk factors)                             |
| Cleveringa et al, 2010  | Netherlands    | RCT    | Primary care practices                                | 1 year         | Nurses                        | Management and prevention of diabetes (and CV risk factors)                             |
| Cortez, 2014            | USA            | RCT    | Academic medical centre oncology clinics              | 11 weeks       | Nurses                        | Management of cancer symptoms                                                           |
| Dalaba 2015             | Ghana          | CBA    | Primary care health centres                           | 2 years        | Nurses                        | Maternal care                                                                           |
| Dowding et al, 2012     | USA            | ITS    | General hospitals                                     | 6 years        | Nurses                        | Risk assessment, falls and pressure ulcer prevention                                    |
| Duclos et al, 2015      | France         | RCT    | Paediatric wards in a university hospital             | 2 years        | Dieticians                    | Nutritional care in malnourished children                                               |
| Dumont et al, 2012      | USA            | RCT    | ICU wards in a regional referral hospital             | 4 months       | Nurses                        | Glycaemic control                                                                       |
| Dykes et al, 2009       | USA            | RCT    | Urban hospitals                                       | 6 months       | Nurses                        | Fall prevention                                                                         |
| Dykes et al, 2020       | USA            | ITS    | Academic medical centres                              | 42 months      | Nurses                        | Fall prevention                                                                         |
| Fitzmaurice et al, 2000 | UK             | RCT    | primary care/general practice                         | 1 year         | Nurses                        | oral anticoagulation care                                                               |
| Forberg et al, 2016     | Sweden         | RCT    | paediatric university hospital                        | 3 months       | Nurses                        | management of peripheral venous catheters in paediatrics                                |
| Fossum et al, 2011      | Norway         | CBA    | Nursing homes                                         | 2 years        | Nurses                        | Preventative behaviours and management of nutrition                                     |

|    |                      |                                     |     |                                           |           |                             |                                                           |
|----|----------------------|-------------------------------------|-----|-------------------------------------------|-----------|-----------------------------|-----------------------------------------------------------|
| 1  |                      |                                     |     |                                           |           |                             |                                                           |
| 2  |                      |                                     |     |                                           |           |                             |                                                           |
| 3  | Geurts et al, 2017   | Netherlands                         | RCT | University paediatric hospital            | 2 years   | Nurses                      | Management of (re)hydration in children                   |
| 4  | Hovorka et al, 2007  | Czech Republic                      | RCT | Cardiac Surgery, University Hospital      | 48 hours  | Nurses                      | Glycaemic control                                         |
| 5  |                      |                                     |     |                                           |           |                             |                                                           |
| 6  | Kroth et al, 2006    | USA                                 | RCT | University Hospital                       | 9 months  | Nurses                      | Body temperature assessment                               |
| 7  | Lattimer et al, 1998 | UK                                  | RCT | Primary care practices                    | 1 year    | Nurses & physicians         | Emergency call assessment                                 |
| 8  |                      |                                     |     |                                           |           |                             |                                                           |
| 9  | Lattimer et al, 2000 | UK                                  | RCT | Primary care practices                    | 1 year    | Nurses & physicians         | Cost analysis of emergency call assessments               |
| 10 |                      |                                     |     |                                           |           |                             |                                                           |
| 11 | Lee et al, 2009      | USA                                 | RCT | School of Nursing (University)            | 8 months  | Nurses                      | Obesity management                                        |
| 12 | Lv et al, 2019       | China                               | RCT | Community healthcare centres              | 1 year    | Nurses                      | Chronic asthma management                                 |
| 13 |                      |                                     |     |                                           |           |                             |                                                           |
| 14 | Mann et al, 2011     | USA                                 | RCT | Surgical Military hospital ICU            | 6 days    | Nurses                      | Glycaemic control in burn intensive care patients         |
| 15 | McDonald et al, 2017 | USA                                 | RCT | Nursing care homes                        | 2 months  | Nurses                      | Management of chronic medical condition                   |
| 16 |                      |                                     |     |                                           |           |                             |                                                           |
| 17 | Paulson et al, 2020  | Norway                              | RCT | University hospital                       | 10 months | Nurses                      | Management of malnutrition                                |
| 18 |                      |                                     |     |                                           |           |                             |                                                           |
| 19 | Plank et al, 2006    | Mixed (Austria, Czech Republic, UK) | RCT | University hospitals                      | 48 hours  | Nurses                      | Glycaemic control                                         |
| 20 |                      |                                     |     |                                           |           |                             |                                                           |
| 21 |                      |                                     |     |                                           |           |                             |                                                           |
| 22 |                      |                                     |     |                                           |           |                             |                                                           |
| 23 |                      |                                     |     |                                           |           |                             |                                                           |
| 24 | Rood et al, 2005     | Netherlands                         | RCT | Surgical ICU in a teaching hospital       | 10 weeks  | Nurses                      | Glycaemic control                                         |
| 25 |                      |                                     |     |                                           |           |                             |                                                           |
| 26 | Roukema et al, 2008  | Netherlands                         | RCT | Children's Hospital                       | 27 months | Nurses                      | Management of children with fever without apparent source |
| 27 |                      |                                     |     |                                           |           |                             |                                                           |
| 28 | Sassen et al, 2014   | Netherlands                         | RCT | University research centre                | 17 months | Nurses and physios          | professionals' behaviour                                  |
| 29 | Snooks et al, 2014   | UK                                  | RCT | Emergency ambulance services              | 1 year    | Paramedics                  | Assessment and management of falls                        |
| 30 | Vadher et al, 1997   | UK                                  | RCT | Cardiovascular medicine, general hospital |           | A nurse and Trainee doctors | oral anticoagulant control                                |
| 31 |                      |                                     |     |                                           |           |                             |                                                           |
| 32 | Wells, 2013          | UK                                  | RCT | Emergency ambulance services              | 1 year    | Paramedics                  | Emergency fall assessment and management                  |
| 33 |                      |                                     |     |                                           |           |                             |                                                           |

**Note:** CBA, controlled before and after; CDSS, computerised decision support; HPs, health professionals; ITS, interrupted time-series; RCT, randomised controlled trials

## Effects of intervention

Most studies reported more than two outcomes from a total of 124 individual outcomes reported (115 distinct types of measured outcomes). There were five distinct outcome groups:

- Care processes: aspects of patient data collection and management, and the process of patient management
- Care outcomes: patient health outcomes (e.g. fall and pressure ulcer prevention rate)
- Health professionals' knowledge, beliefs, and behaviours: outcomes that relate to the health professionals themselves (e.g. changed attitude and perception due to CDSS use)
- Adverse events: safety issues that could arise due to the use of CDSS (e.g. morbidity)
- Economic costs and consequences: outcomes that relate to direct costs, savings, or cost-effectiveness of CDSS

## Care process

CDSS was better than usual care for 16 of 34 (47.0%) care process outcomes. Care delivery was worse (n=5, 14.7%) or no different for 13 (38.2%) processes. See Supplementary Table 3.

### *Adherence to guidelines*

The four RCTs reporting nurses' adherence to guidelines examined 10 outcomes.<sup>32 34 45 49</sup> Only one trial reported baseline and follow-up data for both arms,<sup>34</sup> CDSS users had better adherence to hand disinfection guidelines (risk difference=6.7%; 95% CI: 4.9 to 8.5%); but were less likely to follow guidelines on disposable glove use (risk difference= -1.4%; 95% CI: -2.2 to -0.5%) and daily inspections of Peripheral Venous Catheters (risk difference=-5.2%; 95% CI: -7.2 to -3.3%).

Two trials<sup>32 45</sup> showed nurses using CDSS had better compliance with guidelines on insulin dosing (risk difference=22%; 95% CI: 19 to 25%) and on-time blood sampling (risk difference=4.7%; 95% CI: 2.0 to 7.4%). They deviated less from protocols (mean score difference out of 10 =-2.6; 95% CI: -4.5 to -0.71) and concurred more with recommended insulin doses (than trainee doctors).<sup>49</sup>

### *Patient assessment, diagnosis, and treatment practices*

Five RCTs<sup>31 36 38 46 50</sup> and one ITS<sup>21</sup> reported 18 indicators of patient assessment and treatment quality.

Pain assessment quality (pain score use and appropriateness of choices) of emergency department patients improved by 62.7% (95% CI: 59.6 to 65.8%) and investigation of in-patient paediatric malnutrition aetiology was 21.2% higher (95% CI: 15.9 to 26.5%) with CDSS. However, optimal IV antibiotics administration for sepsis was lower reduced by 5.9% (95% CI: -8.3 to -3.5). Laboratory tests (electrolytes level acid-base balance test) and nutrition supplements (oral Rehydration Solution and intravenous rehydration) were no more likely to be ordered for paediatric inpatients by CDSS-enabled nurses.

There were marginally fewer wrongly recorded temperatures in hospital inpatients amongst CDSS-enabled nurses (risk difference= -0.8%, 95% CI: -0.9 to -0.6). Vital signs recording in patients attended by paramedics were also not significantly different.

### *Documenting care*

One ITS and a randomised trial reported five documentation-focused indicators.<sup>30 52</sup> Falls (risk ratio=1.4, 95% CI: 0.03 to 73.7) and hospital acquired pressure ulcer risk assessments (risk ratio=9.1, 95% CI: 1.95 to 42.5) were higher with CDSS. As was nutritional care planning, food and fluid intake recording and treatment by nurses.<sup>52</sup>

### *Referrals*

Paramedics using CDSS were more likely to refer patients to a community falls than send them to the emergency department (risk difference=4.7%, 95% CI: 1.1. to 8.3).<sup>48</sup>

### **Patient care outcomes**

CDSS improved patient care outcomes in 22 of 54 (40.7%) indicators and worsened them for 1 outcome indicator (2.0%). See Supplementary Table 4.

### *Blood glucose control*



1  
2  
3 Six RCTs<sup>22 25 26 37 42 44</sup> and one non-randomised trial<sup>24</sup> reported 19 indicators of glycaemic control, but  
4  
5 only two reported baseline *and* follow-up values<sup>22 26</sup>. Blood glucose levels were better managed by  
6  
7 ICU nurses using CDSS (mean=-2.2, SD=1.12) compared to paper-based *Mathias* (mean=-1.2, SD=0.66)  
8  
9 and *Bath* (mean=-1.5, SD=0.78) protocols.<sup>22</sup> Glycated haemoglobin (A1C) <7%, systolic blood pressure  
10  
11 <140 and total cholesterol<4.5mmol/l were higher by 4.6% (95% CI: 2.7 to 6.5), 10.2% (95% CI: 7.9 to  
12  
13 12.5) and 3.7% (95% CI: 1.2 to 6.2) respectively in patients receiving care from CDSS-enabled nurses  
14  
15 compared.  
16  
17

18  
19 Trials reporting only follow-up data suggest better blood glucose control by CDSS-using nurses across  
20  
21 a range of indicators: proportion in target range (risk difference=32.9%; 95% CI: 20.0 to 46.0),  
22  
23 occasions within the target glycaemic range (80-110 mg/dl) (risk difference= 33.0%, 95% CI: 20.5 to  
24  
25 45.4), occasions over the target glycaemic range (>110 mg/dl) (risk difference= -31.0%, 95% CI: -43.7  
26  
27 to -18.2), and improvement of glycaemic control for 48 hours (risk difference=40.0%, 95% CI: 27.4 to  
28  
29 52.6)  
30  
31

### 32 33 *Blood coagulation management*

34  
35 One RCT reported three indicators of blood coagulation management in primary care.<sup>33</sup> Nurses using  
36  
37 CDSS had significantly more tests in range (risk difference=4.0%, 95% CI: 0.4 to 7.6) than doctors  
38  
39 *without* CDSS. However, the improvement from baseline was lower amongst nurses (risk  
40  
41 difference=-1.9% (95% CI: -3.1 to -0.7), 'International Normalised Ratio (INR) Results within Range  
42  
43 Point Prevalence' were not significantly different between the two groups and again, nurses using  
44  
45 CDSS improved less than physicians without CDSS (risk difference=-2.6%, 95% CI: -5.3 to -0.1). There  
46  
47 was no significant difference between groups in 'Time Spent within INR Target Range' (risk  
48  
49 difference=7.0%, 95% CI: -0.7 to 14.7).  
50  
51  
52

### 53 54 *Antenatal and peripartum care*

55  
56  
57  
58  
59  
60

1  
2  
3 The CBA study examining antenatal and peripartum care in community settings<sup>29</sup> suggested CDSS-using  
4 midwives reduced delivery complications (per 1000 attendances) compared to usual care (risk  
5 difference=2.4%, 95% CI: 1.1 to 3.7).  
6  
7  
8  
9

### 10 *Managing patients with chronic co-morbid diseases*

11  
12 Two RCTs examined three indicators of successfully managing patients with complex chronic multi-  
13 morbid health conditions in care homes,<sup>43</sup> and with asthma<sup>53</sup> showed no significant differences  
14 between CDSS users and non-users for emergency room usage, hospitalisation and complexity of  
15 medication regimens.  
16  
17  
18  
19  
20  
21

### 22 *Obesity screening*

23  
24 The RCT examining outpatient obesity screening by trainee nurses found CDSS-users had more  
25 'encounters with obesity-related diagnosis' (risk difference=10.3%, 95% CI: 8.0 to 12.5) and fewer  
26 'encounters with missed obesity-related missed diagnosis' (risk difference=41.0%, 95% CI: 48.8 to  
27 35.0) than trainee nurses without CDSS.<sup>41</sup>  
28  
29  
30  
31  
32

### 33 *Fall and pressure ulcer prevention and management*

34  
35 Two RCTs,<sup>20 51</sup> two CBA studies<sup>23 35</sup> and two ITS<sup>30 54</sup> focused on fall or pressure ulcer prevention and  
36 management. In a single trial,<sup>20</sup> pressure ulcer prevalence decreased more during the CDSS-enabled  
37 follow-up period (risk difference=-6.3%, 95% CI: -10.2 to -2.4), a result which was reversed in one of  
38 the CBA studies (risk difference=4.2%, 95% CI: 0.2 to 8.2).<sup>35</sup> The other CBA studies revealed no  
39 significant differences between CDSS using and non-using nurses trying to prevent falls and pressure  
40 ulcers.<sup>23</sup> In the ITS study, fall rate (risk ratio=0.91, 95% CI: 0.75 to 1.12) and hospital acquired pressure  
41 ulcer occurrence (risk ratio=0.47, 95% CI: 0.25 to 0.85) were significantly lower with CDSS.<sup>30</sup>  
42  
43  
44  
45  
46  
47  
48  
49  
50

### 51 *Triage*

52  
53 Three RCTs<sup>39 40 48</sup> and one ITS study<sup>21</sup> evaluated CDSS impact on triage judgements. Health  
54 professionals using CDSS made fewer calls to General Practitioners (GP) for telephone advice (risk  
55 difference= -34.2%, 95% CI: -36.0 to -33.0), had fewer patients visited at home by duty GPs (risk  
56 difference= -34.2%, 95% CI: -36.0 to -33.0), had fewer patients visited at home by duty GPs (risk  
57 difference= -34.2%, 95% CI: -36.0 to -33.0), had fewer patients visited at home by duty GPs (risk  
58 difference= -34.2%, 95% CI: -36.0 to -33.0), had fewer patients visited at home by duty GPs (risk  
59 difference= -34.2%, 95% CI: -36.0 to -33.0), had fewer patients visited at home by duty GPs (risk  
60 difference= -34.2%, 95% CI: -36.0 to -33.0).

1  
2  
3 difference=-5.5%, 95% CI: -6.9 to -4.2), and fewer hospital admissions within 3 days (risk  
4  
5 difference=-0.98%, 95% CI: -1.8 to -0.2) of the judgement. There were no differences in, 'patients left  
6  
7 at scene without conveyance to emergency department' (risk difference= 5.2%, 95% CI: -1.7 to 12.1).  
8  
9  
10 The ITS study reported the proportion of *correct (sic)* triage prioritisation judgements was higher  
11  
12 amongst CDSS-users (risk difference=24.7%; 95% CI: 18.8 to 30.6).  
13  
14

#### 15 *Quality of life and patients' satisfaction*

16  
17 Two RCTs examined CDSS impact on quality of life and patient satisfaction.<sup>27 48</sup> Patients in CDSS-using  
18  
19 groups gained more life years (average difference in years=0.14, 95% CI: -0.12 to 0.40), more healthy  
20  
21 years (average difference in years = 0.04, 95% CI: -0.07 to 0.14) but reported lower quality of life and  
22  
23 satisfaction. None of these differences were statistically significant.  
24  
25

#### 26 **Health professionals' knowledge, beliefs, and behaviour**

27  
28 CDSS effects on knowledge, beliefs, and behaviours of health professionals<sup>20 28 32 47</sup> was the focus of  
29  
30 four RCTs using twelve indicators. CDSS increased 'Positive knowledge change' (risk difference=6.5%;  
31  
32 95% CI:0.8 to 13.2), 'positive attitude change' (risk difference=12.7%, 95% CI: 5.9 to 19.5), 'research  
33  
34 utilisation' (risk difference=9%; 95% CI: 3.3 to 14.7), nurses' satisfaction (difference in satisfaction out  
35  
36 of 10=3.6, 95% CI: 2.4 to 4.8), and perceived deviations from protocols (mean difference out of  
37  
38 10=-4.7, 95% CI: -6.1 to -3.3). Conversely, there was no significant impact on behaviours, intentions,  
39  
40 perceived behavioural control, subjective and moral norms, barriers, and research utilisation of CDSS-  
41  
42 using nurses and physiotherapists (Supplementary Table 5).  
43  
44  
45  
46

#### 47 **Adverse events**

48  
49 CDSS are not risk free, and three RCTs<sup>27 33 48</sup> used four indicators to examine adverse events.  
50  
51 Cardiovascular events in patients with diabetes (risk difference=-11.0%, 95% CI: -18.0 to -4.0) and  
52  
53 deaths in primary care patients (risk difference=-5.7%, 95% CI: -10.1 to -1.7) were lower in CDSS-using  
54  
55 groups of professionals. Serious adverse reactions in primary care patients and deaths in patients  
56  
57 recently fallen and attended by paramedics were no less likely (Supplementary Table 6).  
58  
59  
60

### **Economic costs and consequences**

Four RCTs<sup>27 36 40 48</sup> used 20 indicators to report economic costs and consequences of CDSS. Costs of managing cardiovascular disease were lower in CDSS users (cost difference=-€587.00, 95% CI: -880.00 to -294.00). Diabetes care cost more (cost difference=€326.00, 95% CI: 315.00 to 318.00); took longer per care task ('mean length of job cycle time' difference in minutes=8.9; 95% CI: 2.3 to 15.3) to generate an additional quality adjusted life-year (QALY) costing €38,243.00 (Supplementary Table 7).

## **DISCUSSION**

### **Summary of main results**

Our systematic review suggests CDSS may improve some aspects of nurses' and AHPs' performance and care outcomes. Thirty eight percent (38%) of indicators were better. Of 35 included studies, 26 (74.3%) reported CDSS-influenced care as better than care without CDSS on at least one outcome. In contrast, 8 studies (22.8%) showed no significant difference between CDSS and usual care, with 7 studies suggesting CDSS were less effective than usual care for at least one outcome.

#### *Care processes*

Processes of care were better if CDSS was in use in almost half the studies, 16 of 34 (47%); a headline that masks a very wide range of absolute improvement: from 0.7% to 62.7%. Hand disinfection protocol adherence, insulin dosing, blood sampling at the right time, and documented care were all better in CDSS users. This should be contrasted with the five (16.1%) outcomes where CDSS provided no advantages over usual care. Both sets of findings are mitigated further by the considerable uncertainty in trying to estimate a holistic picture: the effects in 13 care process indicators (41.9%) were not estimable; either because studies lacked power (lower than minimum acceptable of 80%) to detect a difference in the comparison groups, or appropriate confidence intervals were not reported or could not be calculated from information published.

#### *Patient care outcomes*

CDSS was associated with significantly better patient care outcomes across a broad range of 22 of 54 (40.7%) indicators (absolute difference between 4.6% and 42.9%). Just one indicator (1.8%) suggested

1  
2  
3 no significant difference. Nurses using CDSS had better blood glucose control in emergency care  
4 patients (in five out of seven studies involved) and nurses and physiotherapists using CDSS were  
5  
6 associated with better fall risk and pressure ulcer management. Triage was improved in nurses using  
7  
8 CDSS in emergency call centres and paramedics faced with “emergency falls” in older patients.  
9

#### 12 *Health professionals’ knowledge, beliefs, and behaviour*

13  
14 Improved knowledge, beliefs, and behaviour occurred in three of 12 indicators (25%). Nurse and  
15  
16 physiotherapist CDSS-users had more knowledge and better attitudes compared to non-users.  
17  
18 Compared with usual care, nurses utilised more research, were more satisfied at work, and perceived  
19  
20 a greater need to follow protocols if they used CDSS.  
21  
22

#### 23 *Adverse events*

24  
25 CDSS generated fewer adverse events across two of four indicators (50%). CDSS-using nurses had  
26  
27 fewer cardiovascular events and reported deaths in their primary care patients compare to similar  
28  
29 patients seen by doctors not using CDSS.  
30  
31

#### 32 *Economic costs and consequences*

33  
34 CDSS did not significantly increase costs, or save money. Costs per quality adjusted life-year (QALY)  
35  
36 was €38,243.00 in one study – higher than the widely-accepted willingness-to-pay threshold of  
37  
38 €20,000 per QALY<sup>27</sup> and the United Kingdom *de facto* threshold of £30,000 per QALY to be considered  
39  
40 cost-effective by the National Institute for Health and Care Excellence.<sup>55</sup>  
41  
42  
43  
44  
45

#### 46 **Comparison with other studies or reviews**

47  
48 Only one previous review has examined the effects of CDSS on nursing performance and patient  
49  
50 outcomes.<sup>11</sup> Twenty new primary studies have been published since this review; but inconsistent  
51  
52 outcomes and weaknesses in study designs and methods remain. Given the importance of  
53  
54 implementation in effectiveness, it was noteworthy that most studies lacked a theoretical foundation  
55  
56 for the implementation of CDSS. Similarly, many studies did not report using guidelines for designing,  
57  
58 conducting/evaluating, and reporting CDSS-use. Of 35 included studies, just one used an explicit  
59  
60

1  
2  
3 implementation model/theory at design stage.<sup>20</sup> None of the studies discussed their findings with  
4  
5 reference to implementation science/theory.  
6  
7

8 In their review of 100 trials – principally with doctors - Garg et al.<sup>7</sup> reported improved performance in  
9  
10 64% and better patient outcomes in 13% of studies. Our results suggest greater improvement may be  
11  
12 possible for nursing work in particular (47% of process indicators and 41% of outcomes). Garg et al.<sup>7</sup>  
13  
14 transformed improvement into a binary (yes/no) indicator and did not quantify the outcome  
15  
16 improvements – making the clinical significance of improvements hard to ascertain.  
17  
18

19  
20 Bright et al.<sup>8</sup> reviewed RCTs of CDSS with a range of health professional decision makers (doctors,  
21  
22 nurses and AHPs). They reported improvements in processes of care (OR=1.55, 95% CI: 1.38 to 1.74)  
23  
24 and morbidity (RR=0.88, 95% CI: 0.80 to 0.96), but no impact on mortality (OR=0.79, 95% CI: 0.54 to  
25  
26 1.15) or safety/adverse events (RR= 1.01, 95% CI: 0.90 to 1.14). However, outcomes measured were  
27  
28 too heterogeneous for meta-analysis. The criteria for comparison groups was relaxed; the  
29  
30 “intervention” sometimes included paper-based decision support and alternative CDSS systems were  
31  
32 used as a comparator in some studies. Our review required there to be an indication for the use of  
33  
34 CDSS and a comparator that ruled out CDSS-use as part of “usual care”. Whilst we found  
35  
36 improvements are *possible* from CDSS, comparison with Bright et al’s findings would be unreliable.  
37  
38  
39

40  
41 Moja and colleagues’ review of 18 RCTs<sup>10</sup> (including nurses and AHPs alongside doctors) found no  
42  
43 significant difference in CDSS-attributable mortality (RR=0.96, 95% CI: 0.85 to 1.08) but lower  
44  
45 morbidity (RR=0.82, 95% CI: 0.68 to 0.99). Whilst mortality and morbidity findings are similar to ours,  
46  
47 their use of CDSS in the primary study comparator groups, again makes comparisons unreliable.  
48  
49

50  
51 A recent review of 115 trials of CDSS, with a mix of health professionals, reported process  
52  
53 improvements of the order of 5.8% (95% CI: 4.0% to 7.6%) with CDSS.<sup>9</sup> As with Bright et al. the  
54  
55 ‘comparator’ criteria were unclear and outcome measures too heterogeneous for meta-analysis.  
56  
57 Studies with more than two comparators were treated as different trials, meaning double counting  
58  
59  
60

1  
2  
3 and multiple comparisons (p-hacking) could not be ruled out, confounding comparisons with our  
4  
5 findings.  
6  
7

### 8 **Strengths and limitations**

9  
10 Our review, whilst based on a comprehensive literature search, is a function of that literature.  
11  
12 Consequently, we have highlighted primarily the impact of CDSS on nurses rather than AHPs. With the  
13  
14 exception of paramedics and physiotherapists, other AHPs are poorly represented.  
15  
16

17  
18 Evidence quality was poor and has not improved significantly since 2009. Whilst the number of studies  
19  
20 (35), service users/patients (~67,000) and health professionals (~1,318) involved was sizable,  
21  
22 outcomes were too heterogeneous for aggregation. Inconsistencies in the effects of CDSS on target  
23  
24 health professionals' performance and patient outcomes remain unresolved. Moreover, although we  
25  
26 have used a comprehensive list of databases in our search, the possibility of missing studies due to  
27  
28 search terms cannot be ruled-out.  
29  
30

### 31 **Conclusions**

32  
33 CDSS can benefit nurse and (some) AHP delivered performance and patient outcomes. CDSS can  
34  
35 improve adherence to guidelines and enhance patient care. Triaging of emergency patients, glycaemic  
36  
37 control, and screening of malnutrition and obesity all represent appropriate targets for CDSS. These  
38  
39 conclusions require cautious interpretation: they are based on mainly low-quality studies, with  
40  
41 heterogeneous outcomes and indicators.  
42  
43

44  
45 To improve the quality of studies and consistency of outcomes, future research should satisfy two key  
46  
47 requirements. First, system designers and evaluators should consider appropriate implementation  
48  
49 theory/models (examples include Normalisation Process Theory<sup>56</sup> and the NASSS framework<sup>57</sup>) given  
50  
51 the planned technology and associated work to encourage sustained adoption. Second, study  
52  
53 reporting is varied, poor quality and lacking essential detail for implementation; guidelines for  
54  
55 conducting and reporting CDSS should be a feature of the publication of findings. This would make  
56  
57  
58  
59  
60

1  
2  
3 synthesis easier and more informative. Guidelines for CDSS reporting in general already exist, it is  
4  
5 difficult to conceive why they cannot be applied to nursing and AHP-focused CDSS.<sup>58 59</sup>  
6  
7  
8  
9

10 **FUNDING:** The review is funded by the National Institute for Health Research Health Services  
11  
12 Delivery and Research programme [award number: NIHR127926]. The views expressed in this  
13  
14 publication are those of the authors and not necessarily those of the NHS, the NIHR or the  
15  
16 Department of Health.  
17  
18

19  
20 **PATIENT AND PUBLIC INVOLVEMENT:** The initial impetus for the bid came from discussions with  
21  
22 Governors and service user representatives from Leeds Partnership NHS Foundation Trust. CT was a  
23  
24 Non-Executive Director involved with the introduction of technology to help assessment by  
25  
26 community mental health nurses. Because end-users of the review will be professionals and  
27  
28 commissioners as well as patients and the public, we have set up an advisory group composed of  
29  
30 people with specialist knowledge of digital health in a UK NHS context. One of our co-authors, Alison  
31  
32 Ledward, is a public member of the UK NIHR HS&DR Researcher-Led Panel and has helped to shape  
33  
34 our protocol. She has helped to ensure we maintain our focus on the effects of CDSS on patient  
35  
36 outcomes and experiences and determining whether CDSS help nurses and AHPs make better  
37  
38 decisions for patients.  
39  
40  
41

42 **AUTHOR CONTRIBUTIONS:** AK, AL, CT, DA, HY, KB and RR contributed to conception of the review.  
43  
44 DA conducted online database searches. AK, CT, HK, HY, RR, SS and TM contributed to titles and  
45  
46 abstracts screening. CT and TM contributed to full text screening, quality assessment and data  
47  
48 extraction. TM analysed and summarised data as well as produced the first draft of the manuscript.  
49  
50 All authors have been involved in revising the work for important intellectual content and have  
51  
52 approved the final version for publication.  
53  
54  
55

56 **COMPETING INTERESTS:** None declared  
57  
58  
59  
60



1  
2  
3 **PATIENTS CONSENT FOR PUBLICATION:** Not required  
4  
5

6  
7 **ETHICS APPROVAL:** Not required  
8  
9

10 **DATA AVAILABILITY STATEMENT:** Data used in this review are all included in the main document  
11  
12 and supplementary materials published here with.  
13  
14  
15  
16  
17  
18  
19  
20  
21  
22  
23  
24  
25  
26  
27  
28  
29  
30  
31  
32  
33  
34  
35  
36  
37  
38  
39  
40  
41  
42  
43  
44  
45  
46  
47  
48  
49  
50  
51  
52  
53  
54  
55  
56  
57  
58  
59  
60

For peer review only

## REFERENCES

1. Murdoch J, Barnes R, Pooler J, et al. The impact of using computer decision-support software in primary care nurse-led telephone triage: interactional dilemmas and conversational consequences. *Social Science & Medicine* 2015;126:36-47.
2. Anderson JA, Willson P. Clinical Decision Support Systems in Nursing: Synthesis of the Science for Evidence-Based Practice. 2008;26(3):151-58. doi: 10.1097/01.NCN.0000304783.72811.8e
3. Cresswell K, Majeed A, Bates DW, et al. Computerised decision support systems for healthcare professionals: an interpretative review. *Informatix in primary care* 2012;20(2):115-28. [published Online First: 2012/01/01]
4. Bonney W. Impacts and risks of adopting clinical decision support systems. *Efficient Decision Support Systems: Practice and Challenges in Biomedical Related Domain* 2011:21-30.
5. Langhorne P, Ramachandra S. Organised inpatient (stroke unit) care for stroke: network meta-analysis. *Cochrane Database of Systematic Reviews* 2020(4) doi: 10.1002/14651858.CD000197.pub4
6. Sintchenko V, Coiera E. Decision complexity affects the extent and type of decision support use. *AMIA Annual Symposium proceedings AMIA Symposium* 2006;2006:724-28.
7. Garg AX, Adhikari NKJ, McDonald H, et al. Effects of Computerized Clinical Decision Support Systems on Practitioner Performance and Patient Outcomes A Systematic Review. *JAMA* 2005;293(10):1223-38. doi: 10.1001/jama.293.10.1223 %J JAMA
8. Bright TJ, Wong A, Dhurjati R, et al. Effect of Clinical Decision-Support Systems: A Systematic Review. *Annals of Internal Medicine* 2012;157(1):29-43. doi: 10.7326/0003-4819-157-1-201207030-00450 %J Annals of Internal Medicine
9. Kwan JL, Lo L, Ferguson J, et al. Computerised clinical decision support systems and absolute improvements in care: meta-analysis of controlled clinical trials. *bmj* 2020;370
10. Moja L, Kwag KH, Lytras T, et al. Effectiveness of computerized decision support systems linked to electronic health records: a systematic review and meta-analysis. *Am J Public Health* 2014;104(12):e12-22. doi: 10.2105/AJPH.2014.302164 [published Online First: 2014/10/17]
11. Randell R, Mitchell N, Dowding D, et al. Effects of computerized decision support systems on nursing performance and patient outcomes: a systematic review. *Journal of Health Services Research & Policy* 2007;12(4):242-51. doi: 10.1258/135581907782101543
12. Centre for Reviews and Dissemination. Systematic Reviews: CRD's Guidance for Undertaking Reviews in Health Care. . York: Centre for Reviews and Dissemination: University of York 2009.
13. Liberati A, Altman DG, Tetzlaff J, et al. The PRISMA statement for reporting systematic reviews and meta-analyses of studies that evaluate health care interventions: explanation and elaboration. *Annals of internal medicine* 2009;151(4):W-65-W-94.
14. Thompson C, Randell R, Keenan AM, et al. Effects of computerised clinical decision support systems (CDSS) on nursing and allied health professional performance and patient outcomes: a systematic review and user contextualisation.: PROSPERO; 2019 [cited background. Available from: [https://www.crd.york.ac.uk/prospero/display\\_record.php?ID=CRD42019147773](https://www.crd.york.ac.uk/prospero/display_record.php?ID=CRD42019147773).
15. Cochrane Effective Practice Organisation of Care (EPOC). EPOC Resources for review authors: What study designs can be considered for inclusion in an EPOC review and what should that be called? 2017 [cited background. Available from: <http://epoc.cochrane.org/resources/epoc-resources-review-authors> accessed April 15, 2020.
16. Cochrane Effective Practice and Organisation of Care (EPOC). Data collection form. EPOC resources for review authors 2017 [cited background. Available from: <https://epoc.cochrane.org/resources/epoc-resources-review-authors> accessed March 30,2020.

17. Higgins JPT TJ, Chandler J, Cumpston M, Li T, Page MJ, Welch VA (editors). Cochrane Handbook for Systematic Reviews of Interventions version 6.0 (updated July 2019): Cochrane 2019.
18. Cochrane Effective Practice and Organisation of Care (EPOC). Suggested risk of bias criteria for EPOC reviews. EPOC resources for review authors 2017 [cited background. Available from: <https://epoc.cochrane.org/resources/epoc-resources-review-authors>.
19. Borenstein M, Hedges L, Higgins J, et al. When does it make sense to perform a meta-analysis? Introduction to Meta-Analysis. Chester, UK: John Wiley & Sons Ltd 2009.
20. Beeckman D, Clays E, Van Hecke A, et al. A multi-faceted tailored strategy to implement an electronic clinical decision support system for pressure ulcer prevention in nursing homes: a two-armed randomized controlled trial. *Int J Nurs Stud* 2013;50(4):475-86. doi: <https://dx.doi.org/10.1016/j.ijnurstu.2012.09.007>
21. Bennett P, Hardiker N. A Quantitative Study Investigating the Effects of Computerised Clinical Decision Support in the Emergency Department. *Studies in health technology and informatics* 2016;225:53-57.
22. Blaha J, Kopecky P, Matias M, et al. Comparison of Three Protocols for Tight Glycemic Control in Cardiac Surgery Patients. *Diabetes Care* 2009;32(5):757. doi: 10.2337/dc08-1851
23. Byrne CM. Impact of prospective computerized clinical decision support information and targeted assistance on nursing home resident outcomes. State University of New York at Albany, 2005.
24. Canbolat O, Kapucu S, Kilickaya O. Comparison of Routine and Computer-Guided Glucose Management for Glycemic Control in Critically Ill Patients. *Critical Care Nurse* 2019;39(4):20-27. doi: 10.4037/ccn2019431
25. Cavalcanti AB, Silva E, Pereira AJ, et al. A randomized controlled trial comparing a computer-assisted insulin infusion protocol with a strict and a conventional protocol for glucose control in critically ill patients. *Journal of Critical Care* 2009;24(3):371-78. doi: <https://doi.org/10.1016/j.jcrc.2009.05.005>
26. Cleveringa FGW, Gorter KJ, Van Donk MD, et al. Combined task delegation, computerized decision support, and feedback improve cardiovascular risk for type 2 diabetic patients. *Diabetes Care* 2008;31(12):2273-75.
27. Cleveringa FGW, Welsing PMJ, Van Den Donk M, et al. Cost-effectiveness of the diabetes care protocol, a multifaceted computerized decision support diabetes management intervention that reduces cardiovascular risk. *Diabetes Care* 2010;33(2):258-63.
28. Cortez S. Measuring active clinical decision support influence on nursing research utilization. University of Phoenix, 2014.
29. Dalaba MA, Akweongo P, Aborigo RA, et al. Cost-effectiveness of clinical decision support system in improving maternal health care in Ghana. *PLoS ONE* 2015;10(5):e0125920. doi: <https://dx.doi.org/10.1371/journal.pone.0125920>
30. Dowding DW, Turley M, Garrido T. The impact of an electronic health record on nurse sensitive patient outcomes: an interrupted time series analysis. *J Am Med Inform Assoc* 2012;19(4):615-20. doi: <https://dx.doi.org/10.1136/amiajnl-2011-000504>
31. Duclos A, Touzet S, Restier L, et al. Implementation of a computerized system in pediatric wards to improve nutritional care: a cluster randomized trial. *European journal of clinical nutrition* 2015;69(7):769-75. doi: 10.1038/ejcn.2014.288
32. Dumont C, Bourguignon C. Effect of a computerized insulin dose calculator on the process of glycemic control. *Am J Crit Care* 2012;21(2):106-15. doi: <https://dx.doi.org/10.4037/ajcc2012956>
33. Fitzmaurice DA, Hobbs FD, Murray ET, et al. Oral anticoagulation management in primary care with the use of computerized decision support and near-patient testing: a randomized, controlled trial. *Archives of Internal Medicine* 2000;160(15):2343-8.

- 1
- 2
- 3
- 4 34. Forberg U, Unbeck M, Wallin L, et al. Effects of computer reminders on complications of
- 5 peripheral venous catheters and nurses' adherence to a guideline in paediatric care—a cluster
- 6 randomised study. *Implementation Science* 2016;11 doi: 10.1186/s13012-016-0375-9
- 7
- 8 35. Fossum M, Alexander GL, Ehnfors M, et al. Effects of a computerized decision support system on
- 9 pressure ulcers and malnutrition in nursing homes for the elderly. *Int J Med Inf*
- 10 2011;80(9):607-17. doi: <https://dx.doi.org/10.1016/j.ijmedinf.2011.06.009>
- 11
- 12 36. Geurts D, de Vos-Kerkhof E, Polinder S, et al. Implementation of clinical decision support in
- 13 young children with acute gastroenteritis: a randomized controlled trial at the emergency
- 14 department. *European Journal of Pediatrics* 2017;176(2):173-81.
- 15
- 16 37. Hovorka R, Kremen J, Blaha J, et al. Blood Glucose Control by a Model Predictive Control
- 17 Algorithm with Variable Sampling Rate Versus a Routine Glucose Management Protocol in
- 18 Cardiac Surgery Patients: A Randomized Controlled Trial. *The Journal of Clinical*
- 19 *Endocrinology & Metabolism* 2007;92(8):2960-64. doi: 10.1210/jc.2007-0434
- 20
- 21 38. Kroth PJ, Dexter PR, Overhage JM, et al. A computerized decision support system improves the
- 22 accuracy of temperature capture from nursing personnel at the bedside. *Amia Annual*
- 23 *symposium proceedings AMIA symposium* 2006:444-48.
- 24
- 25 39. Lattimer V, George S, Thompson F, et al. Safety and effectiveness of nurse telephone
- 26 consultation in out of hours primary care: Randomised controlled trial. *British Medical*
- 27 *Journal* 1998;317(7165):1054-59.
- 28
- 29 40. Lattimer V, Sassi F, George S, et al. Cost analysis of nurse telephone consultation in out of hours
- 30 primary care: evidence from a randomised controlled trial. *BMJ* 2000;320(7241):1053-7.
- 31
- 32 41. Lee NJ, Chen ES, Currie LM, et al. The effect of a mobile clinical decision support system on the
- 33 diagnosis of obesity and overweight in acute and primary care encounters. *ANS Adv Nurs Sci*
- 34 2009;32(3):211-21. doi: <https://dx.doi.org/10.1097/ANS.0b013e3181b0d6bf>
- 35
- 36 42. Mann EA, Jones JA, Wolf SE, et al. Computer decision support software safely improves glycemic
- 37 control in the burn intensive care unit: A randomized controlled clinical study. *Journal of*
- 38 *Burn Care and Research* 2011;32(2):246-55.
- 39
- 40 43. McDonald MV, Feldman PH, Barron-Vaya Y, et al. Outcomes of clinical decision support (CDS)
- 41 and correlates of CDS use for home care patients with high medication regimen complexity:
- 42 a randomized trial. *Journal of Evaluation in Clinical Practice* 2017;22(1):10-19.
- 43
- 44 44. Plank J, Blaha J, Cordingley J, et al. Multicentric, Randomized, Controlled Trial to Evaluate Blood
- 45 Glucose Control by the Model Predictive Control Algorithm Versus Routine Glucose
- 46 Management Protocols in Intensive Care Unit Patients. *Diabetes Care* 2006;29(2):271. doi:
- 47 10.2337/diacare.29.02.06.dc05-1689
- 48
- 49 45. Rood E, Bosman RJ, van der Spoel JI, et al. Use of a Computerized Guideline for Glucose
- 50 Regulation in the Intensive Care Unit Improved Both Guideline Adherence and Glucose
- 51 Regulation. *Journal of the American Medical Informatics Association* 2005;12(2):172-80. doi:
- 52 10.1197/jamia.M1598
- 53
- 54 46. Roukema J, Steyerberg EW, van der Lei J, et al. Randomized trial of a clinical decision support
- 55 system: impact on the management of children with fever without apparent source. *Journal*
- 56 *of the american medical informatics association : JAMIA* 2008;15(1):107-13. doi:
- 57 10.1197/jamia.M2164
- 58
- 59 47. Sassen B, Kok G, Schepers J, et al. Supporting health care professionals to improve the processes
- 60 of shared decision making and self-management in a web-based intervention: randomized
- controlled trial. *Journal of medical Internet research* 2014;16(10):e211.
48. Snooks HA, Carter B, Dale J, et al. Support and Assessment for Fall Emergency Referrals (SAFER
- 1): cluster randomised trial of computerised clinical decision support for paramedics. *PLoS*
- ONE* 2014;9(9):e106436. doi: <https://dx.doi.org/10.1371/journal.pone.0106436>
49. Vadher BD, Patterson DL, Leaning M. Comparison of oral anticoagulant control by a nurse-
- practitioner using a computer decision-support system with that by clinicians. *Clinical and*
- laboratory haematology* 1997;19(3):203-07.

- 1  
2  
3  
4  
5  
6  
7  
8  
9  
10  
11  
12  
13  
14  
15  
16  
17  
18  
19  
20  
21  
22  
23  
24  
25  
26  
27  
28  
29  
30  
31  
32  
33  
34  
35  
36  
37  
38  
39  
40  
41  
42  
43  
44  
45  
46  
47  
48  
49  
50  
51  
52  
53  
54  
55  
56  
57  
58  
59  
60
50. Wells B. Implementation of Computerised Clinical Decision Support (CCDS) in a Prehospital Setting: Processes of Adoption and Impact on Paramedic Role and Practice. Swansea University (United Kingdom), 2013.
  51. Dykes PC, Carroll DL, Hurley A, et al. Fall prevention in acute care hospitals: a randomized trial. *Jama* 2010;304(17):1912-18.
  52. Paulsen MM, Paur I, Gjestland J, et al. Effects of using the MyFood decision support system on hospitalized patients' nutritional status and treatment: A randomized controlled trial. *Clinical Nutrition* 2020;39(12):3607-17.
  53. Lv S, Ye X, Wang Z, et al. A randomized controlled trial of a mobile application-assisted nurse-led model used to improve treatment outcomes in children with asthma. *Journal of advanced nursing* 2019;75(11):3058-67.
  54. Dykes PC, Burns Z, Adelman J, et al. Evaluation of a patient-centered fall-prevention tool kit to reduce falls and injuries: a nonrandomized controlled trial. *JAMA network open* 2020;3(11):e2025889-e89.
  55. National Institute for Health and Clinical Excellence (NICE). Guide to the methods of technology appraisal London2013 [Available from: <https://www.nice.org.uk/process/pmg9/chapter/the-appraisal-of-the-evidence-and-structured-decision-making> accessed November 18,2020.
  56. Murray E, Treweek S, Pope C, et al. Normalisation process theory: a framework for developing, evaluating and implementing complex interventions. *BMC medicine* 2010;8(1):1-11.
  57. Greenhalgh T, Wherton J, Papoutsi C, et al. Beyond adoption: a new framework for theorizing and evaluating nonadoption, abandonment, and challenges to the scale-up, spread, and sustainability of health and care technologies. *Journal of medical Internet research* 2017;19(11):e367.
  58. Kawamoto K, McDonald CJ. Designing, conducting, and reporting clinical decision support studies: recommendations and call to action. *Annals of Internal Medicine* 2020;172(11\_Supplement):S101-S09. doi: <https://doi.org/10.7326/M19-0875>
  59. National Health Services (NHS). Digital Health: NHSX launches assessment criteria for digital health tools 2020 [cited discussion. Available from: <https://www.digitalhealth.net/2020/10/nhsx-launches-assessment-criteria-for-digital-health-tools/> accessed October 29, 2020.

Figure 1 PRISMA Flow chart of study selection process

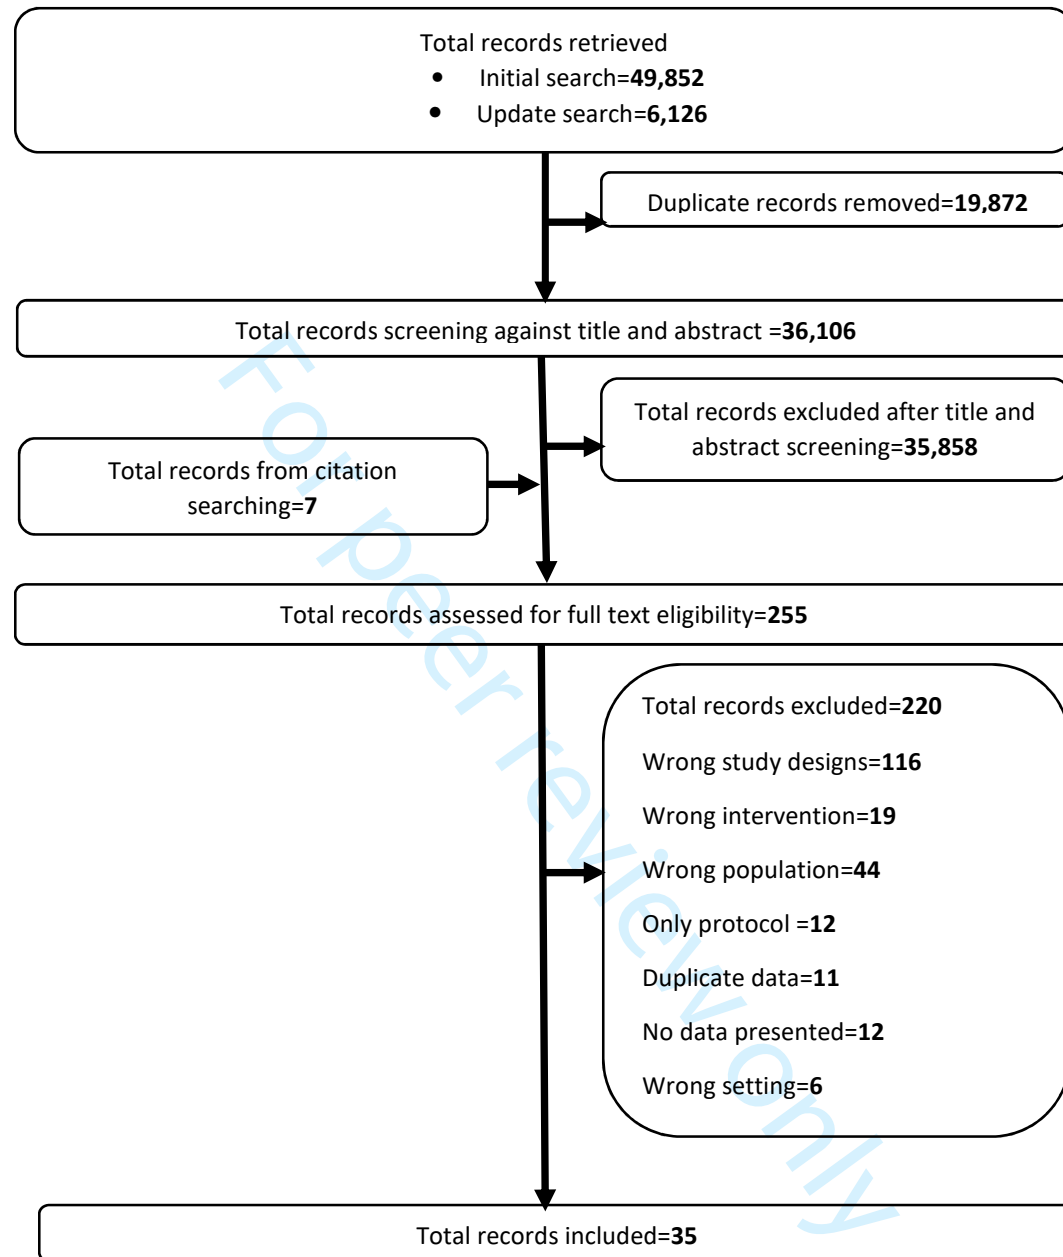

1  
2  
3 **SUPPLEMENTARY MATERIAL LIST**  
4  
5  
6  
7  
8

9 **Supplementary Table 1:** Search strategies, to February 12, 2021

10  
11 **Supplementary Table 2:** Risk of Bias assessment justifications using Effective Practice  
12 Organisation of Care (EPOC)'s tool  
13

14 **Supplementary Table 3:** Summary of patient care process results  
15

16 **Supplementary Table 4** Summary of patient care outcomes results  
17

18 **Supplementary Table 5:** Summary of Health professionals' knowledge, beliefs and  
19 behaviour results  
20

21 **Supplementary Table 6:** Summary of adverse events results  
22

23 **Supplementary Table 7:** Summary of economic costs and consequences results  
24  
25  
26  
27  
28  
29  
30  
31  
32  
33  
34  
35  
36  
37  
38  
39  
40  
41  
42  
43  
44  
45  
46  
47  
48  
49  
50  
51  
52  
53  
54  
55  
56  
57  
58  
59  
60



1  
2  
3  
4  
5  
6  
7  
8  
9  
10  
11  
12  
13  
14  
15  
16  
17  
18  
19  
20  
21  
22  
23  
24  
25  
26  
27  
28  
29  
30  
31  
32  
33  
34  
35  
36  
37  
38  
39  
40  
41  
42  
43  
44  
45  
46  
47  
48  
49  
50  
51  
52  
53  
54  
55  
56  
57  
58  
59  
60

**Supplementary Table 1: Search strategies**

**1. Ovid MEDLINE(R) ALL, 1946 to February 12, 2021 Search Strategy**

-----

1 exp Decision Making/ (207895)  
 2 decision support techniques/ (20911)  
 3 (decision\* adj2 making).ti,ab,kf. (159754)  
 4 (decision\* adj2 support\*).ti,ab,kf. (24230)  
 5 (decision\* adj2 aid\*).ti,ab,kf. (6501)  
 6 or/1-5 (354546)  
 7 exp Computers/ (79322)  
 8 exp information systems/ (238259)  
 9 exp Informatics/ (537355)  
 10 Internet/ (74916)  
 11 Software/ (112580)  
 12 Cell Phone/ (8821)  
 13 Mobile Applications/ (6962)  
 14 exp Telemedicine/ (32559)  
 15 Medical Records Systems, Computerized/ (19076)  
 16 exp Electronic Health Records/ (21793)  
 17 computer\*.ti,ab,kf. (313610)  
 18 electronic\*.ti,ab,kf. (291368)  
 19 (internet or web or online or on-line).ti,ab,kf. (310071)  
 20 (software or computer program\*).ti,ab,kf. (193359)  
 21 (automate\* or automation).ti,ab,kf. (136436)  
 22 (pda or pdas).ti,ab,kf. (13229)  
 23 personal digital assistant\*.ti,ab,kf. (1012)  
 24 (app or apps).ti,ab,kf. (31717)  
 25 (application\* adj2 mobile\*).ti,ab,kf. (4834)  
 26 (iPad\* or iPhone\* or smartphone\* or smart phone\* or smart device\*  
 or mobile phone or android phone\* or cellphone\* or cell  
 phone\*).ti,ab,kf. (26450)  
 27 (tablet adj2 (pc or device\* or comput\*)).ti,ab,kf. (1603)



- 1  
2  
3 28 ((hand held or handheld) adj2 (pc or device\* or comput\*)).ti,ab,kf.  
4 (2669)  
5  
6 29 (telehealth or telecare or telemedicine or ehealth or  
7 mhealth).ti,ab,kf. (29130)  
8  
9 30 or/7-29 (1674343)  
10  
11 31 6 and 30 (66042)  
12  
13 32 exp Decision Making, Computer-Assisted/ (149528)  
14  
15 33 Decision Support Systems, Clinical/ (8302)  
16  
17 34 (computer assisted adj2 (decision\* or diagnos\* or therap\* or  
18 support or treatment? or management)).ti,ab,kf. (1545)  
19  
20 35 (computer aided adj2 (decision\* or diagnos\* or therap\* or support  
21 or treatment? or management)).ti,ab,kf. (3921)  
22  
23 36 (decision adj2 support adj2 (system\* or tool\*)).ti,ab,kf. (9917)  
24  
25 37 (decision making adj2 (system\* or tool\*)).ti,ab,kf. (2560)  
26  
27 38 Expert Systems/ (3420)  
28  
29 39 (expert adj2 system\*).ti,ab,kf. (3613)  
30  
31 40 Reminder Systems/ (3568)  
32  
33 41 ((computer\* or electronic\* or CDSS) adj2 (reminder\* or  
34 alert\*)).ti,ab,kf. (1210)  
35  
36 42 ((medication or medicine or treatment or therapy) adj2 (reminder\*  
37 or alert\*)).ti,ab,kf. (857)  
38  
39 43 reminder system\*.ti,ab,kf. (875)  
40  
41 44 Medical Order Entry Systems/ (2303)  
42  
43 45 ((computer\* or electronic\*) adj2 order entry).ti,ab,kf. (1874)  
44  
45 46 (computer adj2 decision support\*).ti,ab. (412)  
46  
47 47 CPOE.ti,ab,kf. (1139)  
48  
49 48 or/32-47 (177952)  
50  
51 49 31 or 48 [all computerised clinical decision support systems terms]  
52 (228840)  
53  
54 50 Allied Health Personnel/ (11925)  
55  
56 51 Allied Health Occupations/ (587)  
57  
58 52 Physical Therapist Assistants/ (16)  
59  
60 53 Physical Therapy Specialty/ (2889)  
54  
55 54 Speech-Language Pathology/ (3172)

1  
2  
3 55 Occupational Therapy/ (13482)  
4  
5 56 Nutritionists/ (1290)  
6  
7 57 dietetics/ (7837)  
8  
9 58 Anesthesiologists/ (1163)  
10  
11 59 podiatry/ (2273)  
12  
13 60 exp Osteopaths/ (321)  
14  
15 61 osteopathic physicians/ (321)  
16  
17 62 anesthesiologist\*.ti,ab,kf. (22810)  
18  
19 63 podiatrist\*.ti,ab,kf. (910)  
20  
21 64 prosthetist\*.ti,ab,kf. (397)  
22  
23 65 chiropodist\*.ti,ab,kf. (132)  
24  
25 66 orthoptist\*.ti,ab,kf. (319)  
26  
27 67 orthotist\*.ti,ab,kf. (220)  
28  
29 68 osteopath\*.ti,ab,kf. (5983)  
30  
31 69 radiographer\*.ti,ab,kf. (1803)  
32  
33 70 art therapist\*.ti,ab,kf. (89)  
34  
35 71 drama therapist\*.ti,ab,kf. (3)  
36  
37 72 music therapist\*.ti,ab,kf. (368)  
38  
39 73 (allied adj2 health adj2 (profession\* or worker\* or personnel or  
40 occupation\* or staff)).ti,ab,kf. (3421)  
41  
42 74 ((physical or occupational or language or speech or physio\*) adj2  
43 therap\*).ti,ab,kf. (50227)  
44  
45 75 physiotherapist\*.ti,ab,kf. (8544)  
46  
47 76 dietetic\*.ti,ab,kf. (9828)  
48  
49 77 dietitian\*.ti,ab,kf. (6580)  
50  
51 78 nutritionist\*.ti,ab,kf. (3020)  
52  
53 79 Patient care team/ (66483)  
54  
55 80 ((multidisciplinary or multi-disciplinary or multiprofessional or  
56 multi-professional or interdisciplinary or interprofessional) adj2  
57 team\*).ti,ab,kf. (32126)  
58  
59 81 Emergency Medical Technicians/ (5756)  
60  
82 Emergency Medical Services/ (43736)  
83 Ambulances/ (6210)

1  
2  
3 84 Air Ambulances/ (2874)  
4  
5 85 paramedic\*.ti,ab,kf. (8537)  
6  
7 86 HEMS.ti,ab,kf. (767)  
8  
9 87 ems.ti,ab,kf. (13017)  
10  
11 88 emt.ti,ab,kf. (25232)  
12  
13 89 prehospital.ti,ab,kf. (13136)  
14  
15 90 pre-hospital.ti,ab,kf. (4836)  
16  
17 91 first responder\*.ti,ab,kf. (2449)  
18  
19 92 emergency medical technician\*.ti,ab,kf. (1168)  
20  
21 93 emergency services.ti,ab,kf. (4115)  
22  
23 94 ambulance\*.ti,ab,kf. (11269)  
24  
25 95 field triage.ti,ab,kf. (275)  
26  
27 96 out-of-hospital.ti,ab,kf. (11317)  
28  
29 97 (nurse or nurses or nursing).ti,ab,kf. (462330)  
30  
31 98 exp nurses/ (89638)  
32  
33 99 exp nursing staff/ (67063)  
34  
35 100 Midwifery/ (19460)  
36  
37 101 (midwif\* or midwiv\*).ti,ab,kf. (25895)  
38  
39 102 or/50-101 [allied health professionals or nurses or midwives]  
40 (836031)  
41  
42 103 49 and 102 [all CDSS and allied health professionals or nurses or  
43 midwives] (9549)  
44

## 2. Embase Classic+Embase 1947 to February 12, 2021 Search Strategy

45  
46 -----  
47  
48 1 exp Decision Making/ (399525)  
49  
50 2 decision support techniques/ (20092)  
51  
52 3 (decision\* adj2 making).ti,ab,kw. (218454)  
53  
54 4 (decision\* adj2 support\*).ti,ab,kw. (32940)  
55  
56 5 (decision\* adj2 aid\*).ti,ab,kw. (9487)  
57  
58 6 or/1-5 (504731)  
59  
60 7 exp Computer/ (159861)

1  
2  
3 8 exp information system/ (166084)  
4  
5 9 exp information science/ (113984)  
6  
7 10 Internet/ (112888)  
8  
9 11 Software/ (79162)  
10  
11 12 mobile phone/ (17899)  
12  
13 13 smartphone/ (15041)  
14  
15 14 Mobile Application/ (13261)  
16  
17 15 exp Telemedicine/ (47236)  
18  
19 16 electronic medical record system/ (1535)  
20  
21 17 exp Electronic Health Record/ (21723)  
22  
23 18 computer\*.ti,ab,kw. (407323)  
24  
25 19 electronic\*.ti,ab,kw. (350647)  
26  
27 20 (internet or web or online or on-line).ti,ab,kw. (418206)  
28  
29 21 (software or computer program\*).ti,ab,kw. (321717)  
30  
31 22 (automate\* or automation).ti,ab,kw. (197239)  
32  
33 23 (pda or pdas).ti,ab,kw. (18450)  
34  
35 24 personal digital assistant\*.ti,ab,kw. (1217)  
36  
37 25 (app or apps).ti,ab,kw. (43764)  
38  
39 26 (application\* adj2 mobile\*).ti,ab,kw. (6399)  
40  
41 27 (iPad\* or iPhone\* or smartphone\* or smart phone\* or smart device\*  
42 or android phone\* or cellphone\* or cell phone\* or mobile phone\*).ti,ab,kw.  
43 (38430)  
44  
45 28 (tablet adj2 (pc or device\* or comput\*)).ti,ab,kw. (2528)  
46  
47 29 ((hand held or handheld) adj2 (pc or device\* or comput\*)).ti,ab,kw.  
48 (3833)  
49  
50 30 (telehealth or telecare or telemedicine or ehealth or  
51 mhealth).ti,ab,kw. (35247)  
52  
53 31 or/7-30 (1897765)  
54  
55 32 6 and 31 (80108)  
56  
57 33 exp decision support system/ (27016)  
58  
59 34 clinical decision support system/ (3594)  
60  
35 (computer assisted adj2 (decision\* or diagnos\* or therap\* or  
support or treatment? or management)).ti,ab,kw. (2316)

- 1  
2  
3 36 (computer aided adj2 (decision\* or diagnos\* or therap\* or support  
4 or treatment? or management)).ti,ab,kw. (5577)  
5  
6 37 (decision adj2 support adj2 (system\* or tool\*)).ti,ab,kw. (13211)  
7  
8 38 (decision making adj2 (system\* or tool\*)).ti,ab,kw. (3662)  
9  
10 39 Expert System/ (5507)  
11  
12 40 (expert adj2 system\*).ti,ab,kw. (5205)  
13  
14 41 Reminder System/ (2730)  
15  
16 42 ((computer\* or electronic\* or CDSS) adj2 (reminder\* or  
17 alert\*)).ti,ab,kw. (1848)  
18  
19 43 ((medication or medicine or treatment or therapy) adj2 (reminder\*  
20 or alert\*)).ti,ab. (1362)  
21  
22 44 reminder system\*.ti,ab,kw. (1189)  
23  
24 45 physician order entry system/ (284)  
25  
26 46 ((computer\* or electronic\*) adj2 order entry).ti,ab,kw. (2801)  
27  
28 47 CPOE.ti,ab,kw. (1715)  
29  
30 48 (computer\* adj2 decision support\*).ti,ab,kw. (1907)  
31  
32 49 or/33-48 (56905)  
33  
34 50 32 or 49 [All computerised clinical decision support systems terms]  
35 (106747)  
36  
37 51 Occupation/ (52894)  
38  
39 52 physiotherapist assistant/ (83)  
40  
41 53 physiotherapist/ (23150)  
42  
43 54 speech disorder/ (27422)  
44  
45 55 Occupational Therapy/ (25731)  
46  
47 56 dietitian/ (13219)  
48  
49 57 Anesthesiologist/ (7231)  
50  
51 58 osteopathic physician/ (356)  
52  
53 59 radiographer/ (634)  
54  
55 60 podiatrist/ (831)  
56  
57 61 anesthesiologist\*.ti,ab,kw. (34979)  
58  
59 62 podiatrist\*.ti,ab,kw. (1315)  
60  
61 63 prosthetist\*.ti,ab,kw. (635)  
62  
63 64 chiropracist\*.ti,ab,kw. (179)  
64

1  
2  
3 65 orthoptist\*.ti,ab,kw. (620)  
4  
5 66 orthotist\*.ti,ab,kw. (419)  
6  
7 67 osteopath\*.ti,ab,kw. (8365)  
8  
9 68 radiographer\*.ti,ab,kw. (4001)  
10  
11 69 art therapist\*.ti,ab,kw. (266)  
12  
13 70 drama therapist\*.ti,ab,kw. (20)  
14  
15 71 music therapist\*.ti,ab,kw. (607)  
16 72 (allied adj2 health adj2 (profession\* or worker\* or personnel or  
17 occupation\* or staff)).ti,ab,kw. (5338)  
18  
19 73 ((physical or physio\* or occupational or language or speech) adj2  
20 therap\*).ti,ab,kw. (77705)  
21  
22 74 physiotherapist\*.ti,ab,kw. (18271)  
23  
24 75 dietetic\*.ti,ab,kw. (14409)  
25  
26 76 dietitian\*.ti,ab,kw. (10785)  
27  
28 77 nutritionist\*.ti,ab,kw. (5156)  
29  
30 78 Patient care/ (310700)  
31  
32 79 multi-disciplinary team/ (10246)  
33  
34 80 collaborative care team/ (903)  
35 81 ((multidisciplinary or multi-disciplinary or multiprofessional or  
36 multi-professional or interdisciplinary or interprofessional) adj2  
37 team\*).ti,ab,kw. (57679)  
38  
39 82 rescue personnel/ (8059)  
40  
41 83 emergency health service/ (105109)  
42  
43 84 ambulance/ (14751)  
44  
45 85 air medical transport/ (2965)  
46  
47 86 paramedical personnel/ (14896)  
48  
49 87 paramedic\*.ti,ab,kw. (13029)  
50  
51 88 HEMS.ti,ab,kw. (1067)  
52  
53 89 ems.ti,ab,kw. (19120)  
54  
55 90 emt.ti,ab,kw. (36500)  
56  
57 91 prehospital.ti,ab,kw. (18282)  
58  
59 92 pre-hospital.ti,ab,kw. (8656)  
60  
93 first responder\*.ti,ab,kw. (3260)

- 1  
2  
3 94 emergency medical technician\*.ti,ab,kw. (1553)  
4  
5 95 emergency services.ti,ab,kw. (6114)  
6  
7 96 ambulance\*.ti,ab,kw. (17409)  
8  
9 97 field triage.ti,ab,kw. (382)  
10  
11 98 out-of-hospital.ti,ab,kw. (19034)  
12  
13 99 (nurse or nurses or nursing).ti,ab,kw. (554357)  
14  
15 100 exp nurse/ (194823)  
16  
17 101 nursing staff/ (73869)  
18  
19 102 midwife/ (28233)  
20  
21 103 (midwif\* or midwiv\*).ti,ab. (29459)  
22  
23 104 or/51-103 [allied health professionals or nurses or midwives]  
24 (1389786)  
25  
26 105 50 and 104 [all CDSS and allied health professionals or nurses or  
27 midwives] (16820)  
28

### 3. PsycINFO 1806 to February 12,2021 Search Strategy:

---

- 31 1 exp Decision Making/ (124412)  
32  
33 2 Decision Support Systems/ (3377)  
34  
35 3 (decision\* adj2 making).ti,ab. (93578)  
36  
37 4 (decision\* adj2 support\*).ti,ab. (5773)  
38  
39 5 (decision\* adj2 aid\*).ti,ab. (1934)  
40  
41 6 or/1-5 (168090)  
42  
43 7 exp Computers/ (43893)  
44  
45 8 exp information systems/ (48548)  
46  
47 9 exp information/ (44565)  
48  
49 10 Internet/ (29404)  
50  
51 11 computer software/ (10412)  
52  
53 12 mobile Phones/ (4735)  
54  
55 13 smartphones/ (1843)  
56  
57 14 mobile applications/ (1082)  
58  
59 15 Mobile devices/ (2634)  
60  
61 16 exp Telemedicine/ (9383)

- 1  
2  
3 17 Health Information Technology/ (304)  
4  
5 18 Electronic Health Records/ (880)  
6  
7 19 computer\*.ti,ab. (91287)  
8  
9 20 electronic\*.ti,ab. (33377)  
10  
11 21 (internet or web or online or on-line).ti,ab. (145714)  
12  
13 22 (software or computer program\*).ti,ab. (31224)  
14  
15 23 (automate\* or automation).ti,ab. (14470)  
16  
17 24 (pda or pdas).ti,ab. (937)  
18  
19 25 personal digital assistant\*.ti,ab. (440)  
20  
21 26 (app or apps).ti,ab. (7624)  
22  
23 27 (application\* adj2 mobile\*).ti,ab. (1392)  
24  
25 28 (iPad\* or iPhone\* or mobile phone or smartphone\* or smart phone\* or  
26 smart device\* or android phone\* or cellphone\* or cell phone\*).ti,ab.  
27 (10036)  
28  
29 29 (tablet adj2 (pc or device\* or comput\*)).ti,ab. (680)  
30  
31 30 ((hand held or handheld) adj2 (pc or device\* or comput\*)).ti,ab.  
32 (813)  
33  
34 31 (telehealth or telecare or telemedicine or ehealth or  
35 mhealth).ti,ab. (4475)  
36  
37 32 or/7-31 (362180)  
38  
39 33 6 and 32 (21605)  
40  
41 34 Decision Support Systems/ (3377)  
42  
43 35 Computer Assisted Diagnosis/ (1589)  
44  
45 36 (computer assisted adj2 (decision\* or diagnos\* or therap\* or  
46 support or treatment? or management)).ti,ab. (273)  
47  
48 37 (computer aided adj2 (decision\* or diagnos\* or therap\* or support  
49 or treatment? or management)).ti,ab. (179)  
50  
51 38 (decision adj2 support adj2 (system\* or tool\*)).ti,ab. (2189)  
52  
53 39 (decision making adj2 (system\* or tool\*)).ti,ab. (1022)  
54  
55 40 Expert Systems/ (5732)  
56  
57 41 (expert adj2 system\*).ti,ab. (1376)  
58  
59 42 ((medication or medicine or treatment or therapy) adj2 (reminder\*  
60 or alert\*)).ti,ab. (202)  
43 reminder system\*.ti,ab. (125)



1  
2  
3 44 ((computer\* or electronic\*) adj2 order entry).ti,ab. (94)  
4  
5 45 (computer\* adj2 decision support\*).ti,ab. (183)  
6  
7 46 CPOE.ti,ab. (46)  
8  
9 47 or/33-46 [CDSS terms] (30902)  
10  
11 48 Allied Health Personnel/ (1109)  
12  
13 49 Physical Therapists/ (536)  
14  
15 50 Physical Therapy/ (2987)  
16  
17 51 Speech therapists/ (1229)  
18  
19 52 Speech Language Pathology/ (1088)  
20  
21 53 Occupational Therapists/ (2346)  
22  
23 54 anesthesiologist\*.ti,ab. (457)  
24  
25 55 podiatrist\*.ti,ab. (47)  
26  
27 56 prosthetist\*.ti,ab. (23)  
28  
29 57 orthoptist\*.ti,ab. (17)  
30  
31 58 [chiropodist\*.ti,kw.] (0)  
32  
33 59 [orthotist\*.ti,kw.] (0)  
34  
35 60 [osteopath\*.ti,kw.] (0)  
36  
37 61 radiographer\*.ti,ab. (81)  
38  
39 62 art therapist\*.ti,ab. (1375)  
40  
41 63 drama therapist\*.ti,ab. (75)  
42  
43 64 music therapist\*.ti,ab. (1337)  
44  
45 65 (allied adj2 health adj2 (profession\* or worker\* or personnel or  
46 occupation\* or staff)).ti,ab. (1123)  
47  
48 66 ((physical or physio\* or occupational or language or speech) adj2  
49 therap\*).ti,ab. (18118)  
50  
51 67 physiotherapist\*.ti,ab. (1346)  
52  
53 68 dietetic\*.ti,ab. (610)  
54  
55 69 dietitian\*.ti,ab. (756)  
56  
57 70 nutritionist\*.ti,ab. (417)  
58  
59 71 Interdisciplinary Treatment Approach/ (7399)  
60  
61 72 ((multidisciplinary or multi-disciplinary or multiprofessional or  
62 multi-professional or interdisciplinary or interprofessional) adj2  
63 team\*).ti,ab. (8106)

1  
2  
3 73 emergency services/ (8779)  
4  
5 74 emergency personnel/ (117)  
6  
7 75 paramedics/ (337)  
8  
9 76 HEMS.ti,ab. (27)  
10  
11 77 ems.ti,ab. (1010)  
12  
13 78 emt.ti,ab. (230)  
14  
15 79 prehospita1.ti,ab. (387)  
16  
17 80 pre-hospita1.ti,ab. (262)  
18  
19 81 first responders/ (307)  
20  
21 82 emergency medical technician\*.ti,ab. (154)  
22  
23 83 emergency services.ti,ab. (1211)  
24  
25 84 ambulance\*.ti,ab. (860)  
26  
27 85 field triage.ti,ab. (6)  
28  
29 86 out-of-hospita1.ti,ab. (355)  
30  
31 87 exp nurses/ (32673)  
32  
33 88 nursing/ (23241)  
34  
35 89 (nurse or nurses or nursing).ti,ab. (97190)  
36  
37 90 midwifery/ (1436)  
38  
39 91 (midwif\* or midwiv\*).ti,ab. (3137)  
40  
41 92 or/48-91 [allied health professionals or nurses or midwives]  
42 (148809)  
43  
44 93 47 and 92 [all CDSS and allied health professionals or nurses or  
45 midwives] (1171)  
46

#### 4. Database: HMIC Health Management Information Consortium 1983 – February 12, 2021

##### Search Strategy:

---

1 exp Decision Making/ (5606)  
2 (decision\* adj2 making).ti,ab. (6795)  
3 (decision\* adj2 support\*).ti,ab. (871)  
4 (decision\* adj2 aid\*).ti,ab. (276)  
5 or/1-4 (10211)  
6 exp Computers/ (2133)  
7 exp information systems/ (4916)

1  
2  
3 8 exp medical Informatics/ (67)  
4  
5 9 Internet/ (1342)  
6  
7 10 Software/ (0)  
8  
9 11 telephone/ (110)  
10  
11 12 Telemedicine/ (1328)  
12  
13 13 computerised medical records systems.ti,ab. (0)  
14  
15 14 Medical Records/ (1946)  
16  
17 15 computer\*.ti,ab. (6305)  
18  
19 16 electronic\*.ti,ab. (4484)  
20  
21 17 (internet or web or online or on-line).ti,ab. (5066)  
22  
23 18 (software or computer program\*).ti,ab. (1593)  
24  
25 19 (automate\* or automation).ti,ab. (605)  
26  
27 20 (pda or pdas).ti,ab. (56)  
28  
29 21 personal digital assistant\*.ti,ab. (32)  
30  
31 22 (app or apps).ti,ab. (130)  
32  
33 23 (application\* adj2 mobile\*).ti,ab. (32)  
34  
35 24 (iPad\* or iPhone\* or smartphone\* or smart phone\* or smart device\*  
36 or android phone\* or cellphone\* or cell phone\*).ti,ab. (146)  
37  
38 25 (tablet adj2 (pc or device\* or comput\*)).ti,ab. (16)  
39  
40 26 ((hand held or handheld) adj2 (pc or device\* or comput\*)).ti,ab.  
41 (61)  
42  
43 27 (telehealth or telecare or telemedicine or mhealth or  
44 ehealth).ti,ab. (1453)  
45  
46 28 or/6-27 (22729)  
47  
48 29 5 and 28 (1239)  
49  
50 30 (computer assisted adj2 (decision\* or diagnos\* or therap\* or  
51 support or treatment? or management)).ti,ab. (25)  
52  
53 31 (computer aided adj2 (decision\* or diagnos\* or therap\* or support  
54 or treatment? or management)).ti,ab. (17)  
55  
56 32 (decision adj2 support adj2 (system\* or tool\*)).ti,ab. (347)  
57  
58 33 (decision making adj2 (system\* or tool\*)).ti,ab. (107)  
59  
60 34 Expert Systems/ (107)  
35 (expert adj2 system\*).ti,ab. (131)

1  
2  
3 36 ((computer\* or electronic\* or CDSS) adj2 (reminder\* or  
4 alert\*)).ti,ab. (48)  
5  
6 37 reminder system\*.ti,ab. (44)  
7  
8 38 ((computer\* or electronic\* or CDSS) adj2 (reminder\* or  
9 alert\*)).ti,ab. (48)  
10  
11 39 ((computer\* or electronic\*) adj2 order entry).ti,ab. (58)  
12  
13 40 (computer\* adj2 decision support\*).ti,ab. (114)  
14  
15 41 CPOE.ti,ab. (26)  
16  
17 42 or/29-41 [all CDSS terms] (1714)  
18  
19 43 Allied Health Personnel/ (0)  
20  
21 44 Physical Therapy Speciality/ (0)  
22  
23 45 Physiotherapists/ (350)  
24  
25 46 Speech-Language Pathology/ (0)  
26  
27 47 Occupational Therapists/ (542)  
28  
29 48 podiatrists/ (59)  
30  
31 49 anesthesiologist\*.ti,ab. (11)  
32  
33 50 podiatrist\*.ti,ab. (37)  
34  
35 51 prosthetist\*.ti,ab. (19)  
36  
37 52 chiropodist\*.ti,ab. (76)  
38  
39 53 orthoptist\*.ti,ab. (23)  
40  
41 54 orthotist\*.ti,ab. (15)  
42  
43 55 osteopath\*.ti,ab. (93)  
44  
45 56 radiographer\*.ti,ab. (178)  
46  
47 57 art therapist\*.ti,ab. (5)  
48  
49 58 drama therapist\*.ti,ab. (2)  
50  
51 59 music therapist\*.ti,tw. (15)  
52  
53 60 (allied adj2 health adj2 (profession\* or worker\* or personnel or  
54 occupation\* or staff)).ti,ab. (368)  
55  
56 61 ((physical or physio\* or occupational or language or speech) adj2  
57 therap\*).ti,ab. (2010)  
58  
59 62 physiotherapist\*.ti,ab. (671)  
60  
61 63 dietetic\*.ti,ab. (187)  
62  
63 64 dietitian\*.ti,ab. (130)  
64

- 1  
2  
3 65 nutritionist\*.ti,ab. (28)  
4  
5 66 Patient care team/ (139)  
6  
7 67 ((multidisciplinary or multi-disciplinary or multiprofessional or  
8 multi-professional or interdisciplinary or interprofessional) adj2  
9 team\*).ti,ab. (1676)  
10  
11 68 exp emergency medical services/ (0)  
12  
13 69 paramedic\*.ti,ab. (395)  
14  
15 70 HEMS.ti,ab. (11)  
16  
17 71 ems.ti,ab. (51)  
18  
19 72 emt.ti,ab. (3)  
20  
21 73 prehospital.ti,ab. (58)  
22  
23 74 pre-hospital.ti,ab. (137)  
24  
25 75 first responder\*.ti,ab. (28)  
26  
27 76 emergency medical technician\*.ti,ab. (8)  
28  
29 77 emergency services.ti,ab. (514)  
30  
31 78 ambulance\*.ti,ab. (1710)  
32  
33 79 field triage.ti,ab. (1)  
34  
35 80 out-of-hospital.tw. (292)  
36  
37 81 nurses/ (12920)  
38  
39 82 nursing staff/ (12920)  
40  
41 83 (nurse or nurses or nursing).ti,ab. (39541)  
42  
43 84 midwifery/ (665)  
44  
45 85 (midwif\* or midwiv\*).ti,ab. (4553)  
46  
47 86 or/43-85 [allied health professionals or nurses or midwives]  
48 (50288)  
49  
50 87 42 and 86 [all CDSS terms and allied health professionals or nurses  
51 or midwives] (291)  
52  
53  
54

##### 5. AMED (Allied and Complementary Medicine) 1985 to October 2019 Search Strategy:

---

- 1 exp Decision Making/ (4522)  
2 (decision\* adj2 making).ti,ab. (2826)  
3 (decision\* adj2 support\*).ti,ab. (217)

1  
2  
3 4 (decision\* adj2 aid\*).ti,ab. (92)  
4  
5 5 or/1-4 (6218)  
6  
7 6 exp Computers/ (1765)  
8  
9 7 exp information systems/ (150)  
10  
11 8 exp medical Informatics/ (775)  
12  
13 9 Internet/ (1242)  
14  
15 10 Software/ (450)  
16  
17 11 telephone/ (377)  
18  
19 12 Telemedicine/ (985)  
20  
21 13 computerised medical records systems.ti,ab. (0)  
22  
23 14 Medical Records/ (383)  
24  
25 15 computer\*.ti,ab. (4200)  
26  
27 16 electronic\*.ti,ab. (2339)  
28  
29 17 (internet or web or online or on-line).ti,ab. (6503)  
30  
31 18 (software or computer program\*).ti,ab. (1436)  
32  
33 19 (automate\* or automation).ti,ab. (399)  
34  
35 20 (pda or pdas).ti,ab. (77)  
36  
37 21 personal digital assistant\*.ti,ab. (26)  
38  
39 22 (app or apps).ti,ab. (175)  
40  
41 23 (application\* adj2 mobile\*).ti,ab. (39)  
42  
43 24 (iPad\* or iPhone\* or smartphone\* or smart phone\* or smart device\*  
44 or android phone\* or cellphone\* or cell phone\*).ti,ab. (225)  
45  
46 25 (tablet adj2 (pc or device\* or comput\*).ti,ab. (29)  
47  
48 26 ((hand held or handheld) adj2 (pc or device\* or comput\*).ti,ab.  
49 (40)  
50  
51 27 (telehealth or telecare or telemedicine or mhealth or  
52 ehealth).ti,ab. (555)  
53  
54 28 or/6-27 (16500)  
55  
56 29 5 and 28 (443)  
57  
58 30 (computer assisted adj2 (decision\* or diagnos\* or therap\* or  
59 support or treatment? or management)).ti,ab. (18)  
60  
61 31 (computer aided adj2 (decision\* or diagnos\* or therap\* or support  
62 or treatment? or management)).ti,ab. (13)  
63  
64 32 (decision adj2 support adj2 (system\* or tool\*).ti,ab. (41)

1  
2  
3 33 (decision making adj2 (system\* or tool\*)).ti,ab. (62)  
4  
5 34 Expert Systems/ (12)  
6  
7 35 (expert adj2 system\*).ti,ab. (46)  
8  
9 36 ((computer\* or electronic\* or CDSS) adj2 (reminder\* or  
10 alert\*)).ti,ab. (7)  
11  
12 37 reminder system\*.ti,ab. (3)  
13  
14 38 ((computer\* or electronic\* or CDSS) adj2 (reminder\* or  
15 alert\*)).ti,ab. (7)  
16  
17 39 ((computer\* or electronic\*) adj2 order entry).ti,ab. (0)  
18  
19 40 (computer\* adj2 decision support\*).ti,ab. (8)  
20  
21 41 CPOE.ti,ab. (0)  
22  
23 42 or/29-41 [all CDSS terms] (593)  
24  
25 43 Allied Health Personnel/ (659)  
26  
27 44 Physical Therapy Speciality/ (2201)  
28  
29 45 Physiotherapists/ (1476)  
30  
31 46 Speech-Language Pathology/ (237)  
32  
33 47 Occupational Therapists/ (1076)  
34  
35 48 podiatrists/ (36)  
36  
37 49 anesthesiologist\*.ti,ab. (64)  
38  
39 50 podiatrist\*.ti,ab. (172)  
40  
41 51 prosthetist\*.ti,ab. (84)  
42  
43 52 chiropracist\*.ti,ab. (32)  
44  
45 53 orthoptist\*.ti,ab. (1)  
46  
47 54 orthotist\*.ti,ab. (63)  
48  
49 55 osteopath\*.ti,ab. (1733)  
50  
51 56 radiographer\*.ti,ab. (18)  
52  
53 57 art therapist\*.ti,ab. (179)  
54  
55 58 drama therapist\*.ti,ab. (10)  
56  
57 59 music therapist\*.ti,tw. (115)  
58  
59 60 (allied adj2 health adj2 (profession\* or worker\* or personnel or  
60 occupation\* or staff)).ti,ab. (285)  
61  
62 ((physical or physio\* or occupational or language or speech) adj2  
therap\*).ti,ab. (14459)

- 1  
2  
3 62 physiotherapist\*.ti,ab. (2897)  
4  
5 63 dietetic\*.ti,ab. (133)  
6  
7 64 dietitian\*.ti,ab. (74)  
8  
9 65 nutritionist\*.ti,ab. (39)  
10  
11 66 Patient care team/ (1786)  
12  
13 67 ((multidisciplinary or multi-disciplinary or multiprofessional or  
14 multi-professional or interdisciplinary or interprofessional) adj2  
15 team\*).ti,ab. (1129)  
16  
17 68 exp emergency medical services/ (420)  
18  
19 69 paramedic\*.ti,ab. (78)  
20  
21 70 HEMS.ti,ab. (1)  
22  
23 71 ems.ti,ab. (96)  
24  
25 72 emt.ti,ab. (65)  
26  
27 73 prehospital.ti,ab. (32)  
28  
29 74 pre-hospital.ti,ab. (13)  
30  
31 75 first responder\*.ti,ab. (9)  
32  
33 76 emergency medical technician\*.ti,ab. (8)  
34  
35 77 emergency services.ti,ab. (24)  
36  
37 78 ambulance\*.ti,ab. (45)  
38  
39 79 field triage.ti,ab. (0)  
40  
41 80 out-of-hospital.tw. (10429)  
42  
43 81 nurses/ (1071)  
44  
45 82 nursing staff/ (213)  
46  
47 83 (nurse or nurses or nursing).ti,ab. (9441)  
48  
49 84 midwifery/ (120)  
50  
51 85 (midwif\* or midwiv\*).ti,ab. (239)  
52  
53 86 or/43-85 [allied health professionals or nurses or midwives]  
54 (41793)  
55  
56 87 42 and 86 [all CDSS terms and allied health professionals or nurses  
57 or midwives] (186)  
58  
59  
60

## 6. CINAHL EBSCO Search Strategy

---



| #    | Query*                                                                                                                                                                                                                                                                                                                                                                          | Results |
|------|---------------------------------------------------------------------------------------------------------------------------------------------------------------------------------------------------------------------------------------------------------------------------------------------------------------------------------------------------------------------------------|---------|
| S101 | S46 AND S100                                                                                                                                                                                                                                                                                                                                                                    | 11,824  |
| S100 | S47 OR S48 OR S49 OR S50 OR S51 OR S52 OR S53 OR S54 OR S55 OR S56 OR S57 OR S58 OR S59 OR S60 OR S61 OR S62 OR S63 OR S64 OR S65 OR S66 OR S67 OR S68 OR S69 OR S70 OR S71 OR S72 OR S73 OR S74 OR S75 OR S76 OR S77 OR S78 OR S79 OR S80 OR S81 OR S82 OR S83 OR S84 OR S85 OR S86 OR S87 OR S88 OR S89 OR S90 OR S91 OR S92 OR S93 OR S94 OR S95 OR S96 OR S97 OR S98 OR S99 | 867,856 |
| S99  | TI ( (midwif* or midwiv*) ) OR AB ( (midwif* or midwiv*) )                                                                                                                                                                                                                                                                                                                      | 35,031  |
| S98  | (MH "Midwives+")                                                                                                                                                                                                                                                                                                                                                                | 15,748  |
| S97  | (MH "Midwifery+")                                                                                                                                                                                                                                                                                                                                                               | 20,976  |
| S96  | TI ( ( (nurse or nurses or nursing) ) OR ( (nurse or nurses or nursing) ) ) OR AB ( ( (nurse or nurses or nursing) ) OR ( (nurse or nurses or nursing) ) )                                                                                                                                                                                                                      | 535,366 |
| S95  | (MH "Nursing Staff, Hospital") "                                                                                                                                                                                                                                                                                                                                                | 20,953  |
| S94  | (MH "Nurses+")                                                                                                                                                                                                                                                                                                                                                                  | 228,583 |
| S93  | TI "music therapist*" OR AB "music therapist"                                                                                                                                                                                                                                                                                                                                   | 592     |
| S92  | TI "drama therapist*" OR AB "drama therapist"                                                                                                                                                                                                                                                                                                                                   | 6       |
| S91  | TI "art therapist*" OR AB "art therapist"                                                                                                                                                                                                                                                                                                                                       | 420     |
| S90  | TI radiographer* OR AB radiographer*                                                                                                                                                                                                                                                                                                                                            | 2,300   |
| S89  | TI osteopath* OR AB osteopath*                                                                                                                                                                                                                                                                                                                                                  | 3,074   |
| S88  | TI orthotist* OR AB orthotist*                                                                                                                                                                                                                                                                                                                                                  | 188     |
| S87  | TI orthoptist* OR AB orthoptist*                                                                                                                                                                                                                                                                                                                                                | 34      |
| S86  | TI chiropodist* OR AB chiropodist*                                                                                                                                                                                                                                                                                                                                              | 458     |
| S85  | TI prosthetist* OR AB prosthetist*                                                                                                                                                                                                                                                                                                                                              | 335     |
| S84  | TI podiatrist* OR AB podiatrist*                                                                                                                                                                                                                                                                                                                                                | 2,440   |
| S83  | TI anesthesiologist* OR AB anesthesiologist*                                                                                                                                                                                                                                                                                                                                    | 6,441   |
| S82  | (MH "Radiologic Technologists")                                                                                                                                                                                                                                                                                                                                                 | 5,733   |
| S81  | (MH "Osteopaths")                                                                                                                                                                                                                                                                                                                                                               | 682     |
| S80  | (MH "Podiatrists")                                                                                                                                                                                                                                                                                                                                                              | 2,444   |
| S79  | MH "Anesthesiologists")                                                                                                                                                                                                                                                                                                                                                         | 1,495   |

|     |                                                                                                                                                                                                                                                                                                 |        |
|-----|-------------------------------------------------------------------------------------------------------------------------------------------------------------------------------------------------------------------------------------------------------------------------------------------------|--------|
| S78 | TI "out-of-hospital" OR AB "out-of-hospital"                                                                                                                                                                                                                                                    | 6,634  |
| S77 | TI "field triage" OR AB "field triage"                                                                                                                                                                                                                                                          | 173    |
| S76 | TI ambulance* OR AB ambulance*                                                                                                                                                                                                                                                                  | 6,499  |
| S75 | TI "emergency services" OR AB "emergency services"                                                                                                                                                                                                                                              | 1,921  |
| S74 | TI "emergency medical technician*" OR AB "emergency medical technician*"                                                                                                                                                                                                                        | 725    |
| S73 | "first responder*" OR AB "first responder*"                                                                                                                                                                                                                                                     | 1,402  |
| S72 | TI pre-hospital OR AB pre-hospital                                                                                                                                                                                                                                                              | 2,500  |
| S71 | TI prehospita OR AB prehospita                                                                                                                                                                                                                                                                  | 7,480  |
| S70 | TI emt OR AB emt                                                                                                                                                                                                                                                                                | 2,753  |
| S69 | TI EMS OR AB EMS                                                                                                                                                                                                                                                                                | 9,336  |
| S68 | TI HEMS OR AB HEMS                                                                                                                                                                                                                                                                              | 1,348  |
| S67 | TI paramedic* OR AB paramedic*                                                                                                                                                                                                                                                                  | 5,903  |
| S66 | (MH "Ambulances")                                                                                                                                                                                                                                                                               | 4,565  |
| S65 | (MH "Emergency Medical Services")                                                                                                                                                                                                                                                               | 26,747 |
| S64 | (MH "Emergency Medical Technicians")                                                                                                                                                                                                                                                            | 12,426 |
| S63 | TI ( ((multidisciplinary or multi-disciplinary or multiprofessional or "multi-professional" or interdisciplinary or interprofessional) ) OR AB ( (multidisciplinary or "multi-disciplinary" or multiprofessional or "multi-professional" or interdisciplinary or interprofessional) N2 team*) ) | 33,294 |
| S62 | (MH "Multidisciplinary Care Team")                                                                                                                                                                                                                                                              | 45,878 |
| S61 | TI nutritionist* OR AB nutritionist*                                                                                                                                                                                                                                                            | 1,676  |
| S60 | TI dietitian* OR AB dietitian*                                                                                                                                                                                                                                                                  | 5,004  |
| S59 | TI physiotherapist* OR AB physiotherapist*                                                                                                                                                                                                                                                      | 8,379  |
| S58 | TI ( ((physical or occupational or language or speech) N1 therapist*) ) AND AB ( ((physical or occupational or language or speech) N1 therapist*) )                                                                                                                                             | 2,999  |
| S57 | TI ( (allied N2 health N2 (profession* or worker* or personnel or occupation* or staff)) ) OR AB ( (allied N2 health N2 (profession* or worker* or personnel or occupation* or staff)) )                                                                                                        | 2,748  |
| S56 | (MH "Dietetics")                                                                                                                                                                                                                                                                                | 2,356  |

|     |                                                                                                                                                                                                                                                                                                                  |        |
|-----|------------------------------------------------------------------------------------------------------------------------------------------------------------------------------------------------------------------------------------------------------------------------------------------------------------------|--------|
| S55 | (MH "Nutrition Services")                                                                                                                                                                                                                                                                                        | 1,054  |
| S54 | (MH "Occupational Therapy")                                                                                                                                                                                                                                                                                      | 23,116 |
| S53 | (MH "Speech-Language Pathology")                                                                                                                                                                                                                                                                                 | 6,105  |
| S52 | (MH "Physical Therapists")                                                                                                                                                                                                                                                                                       | 12,660 |
| S51 | (MH "Physical Therapy")                                                                                                                                                                                                                                                                                          | 35,365 |
| S50 | (MH "Physical Therapist Assistants")                                                                                                                                                                                                                                                                             | 814    |
| S49 | TI "music therapist*" OR AB "music therapist"                                                                                                                                                                                                                                                                    | 592    |
| S48 | TI "Physical Therapist Assistant*" or AB "Physical Therapist Assistant"                                                                                                                                                                                                                                          | 276    |
| S47 | (MH "Allied Health Personnel")                                                                                                                                                                                                                                                                                   | 4,326  |
| S46 | S31 or S32 or S33 or S34 or S35 or S36 or S37 or S38 or S39 or S40 or S41 or S42 or S43 or S44 or S45 or S46                                                                                                                                                                                                     | 94,625 |
| S45 | TI ( ((computer* or electronic*) N2 order entry) ) OR AB ( ((computer* or electronic*) N2 order entry) ) or TI ((CPOE or computer* N2 decision*)) or AB ((CPOE or computer* N2 decision*))                                                                                                                       | 2,368  |
| S44 | (MH "Electronic Order Entry")                                                                                                                                                                                                                                                                                    | 3,355  |
| S43 | TI "reminder system*" OR AB "reminder system"                                                                                                                                                                                                                                                                    | 390    |
| S42 | TI ( ((computer* or electronic* or CDSS) N2 (reminder* or alert*)) ) OR AB ( ((computer* or electronic* or CDSS) N2 (reminder* or alert*)) ) or TI ((medication or medicine or treatment or therapy) N2 (reminder* or alert*)) or AB ((medication or medicine or treatment or therapy) N2 (reminder* or alert*)) | 1,691  |
| S41 | (MH "Reminder Systems")                                                                                                                                                                                                                                                                                          | 2,949  |
| S40 | TI (expert N2 system*) OR AB (expert N2 system*)                                                                                                                                                                                                                                                                 | 1,008  |
| S39 | (MH "Expert Systems")                                                                                                                                                                                                                                                                                            | 524    |
| S38 | TI ( (decision making N2 (system* or tool*)) ) OR AB ( (decision making N2 (system* or tool*)) )                                                                                                                                                                                                                 | 1,643  |
| S37 | TI ( (decision N2 support N2 (system* or tool*)) ) OR AB ( (decision N2 support N2 (system* or tool*)) )                                                                                                                                                                                                         | 3,935  |
| S36 | TI ( ("computer aided" N2 (decision* or diagnos* or therap*)) ) OR AB ( ("computer aided" N2 (decision* or diagnos* or therap*)) )                                                                                                                                                                               | 712    |
| S35 | TI ( ("computer aided" adj2 (decision* or diagnos* or therap* or support or treatment* or management)) ) OR AB                                                                                                                                                                                                   | 9      |

|     |                                                                                                                                                                                                                                                                                                            |           |
|-----|------------------------------------------------------------------------------------------------------------------------------------------------------------------------------------------------------------------------------------------------------------------------------------------------------------|-----------|
|     | ( ("computer aided" adj2 (decision* or diagnos* or therap* or support or treatment* or management) )                                                                                                                                                                                                       |           |
| S34 | TI ( ("computer assisted" N2 (decision* or diagnos* or therap* or support or treatment* or management)) ) OR AB ( ("computer assisted" N2 (decision* or diagnos* or therap* or support or treatment* or management)) )                                                                                     | 309       |
| S33 | (MH "Decision Support Systems, Clinical")                                                                                                                                                                                                                                                                  | 5,533     |
| S32 | (MH "Decision Making, Computer Assisted+")                                                                                                                                                                                                                                                                 | 45,289    |
| S31 | S6 AND S30                                                                                                                                                                                                                                                                                                 | 41,561    |
| S30 | S7 OR S8 OR S9 OR S10 OR S11 OR S12 OR S13 OR S14 OR S15 OR S16 OR S17 OR S18 OR S19 OR S20 OR S21 OR S22 OR S23 OR S24 OR S25 OR S26 OR S27 OR S28 OR S29                                                                                                                                                 | 1,131,998 |
| S29 | TI ( (telehealth or telecare or telemedicine OR mhealth or ehealth) ) OR AB ( (telehealth or telecare or telemedicine or mhealth or ehealth) )                                                                                                                                                             | 14,130    |
| S28 | TI ( (tablet N2 (pc or device* or comput*)) ) OR AB ( (tablet N2 (pc or device* or comput*)) ) or TI ((handheld or "hand held" N2 (pc or device* or comput*)) or AB ((handheld or "hand held" N2 (pc or device* or comput*))                                                                               | 3,837     |
| S27 | TI ( (iPad* or iPhone* or smartphone* or "smart phone*" or "smart device*" or "mobile phone*" or "android phone*" or cellphone* or "cell phone*") ) OR AB ( (iPad* or iPhone* or smartphone* or "smart phone*" or "smart device*" or "mobile phone*" or "android phone*" or cellphone* or "cell phone*") ) | 11,037    |
| S26 | TI (application* N2 mobile*) OR AB (application* N2 mobile*)                                                                                                                                                                                                                                               | 2,919     |
| S25 | TI ( (app or apps) ) OR AB ( (app or apps) )                                                                                                                                                                                                                                                               | 10,043    |
| S24 | TI "personal digital assistant*" OR AB "personal digital assistant*"                                                                                                                                                                                                                                       | 638       |
| S23 | TI ( (pda or pdas) ) OR AB ( (pda or pdas) )                                                                                                                                                                                                                                                               | 2,146     |
| S22 | TI ( automate* or automation ) OR AB ( automate* or automation )                                                                                                                                                                                                                                           | 22,986    |
| S21 | TI ( (software or "computer program*") ) OR AB ( (software or "computer program*") )                                                                                                                                                                                                                       | 50,295    |
| S20 | TI ( (internet or web or online or on-line) ) OR AB ( (internet or web or online or on-line) )                                                                                                                                                                                                             | 244,189   |
| S19 | TI electronic* OR AB electronic*                                                                                                                                                                                                                                                                           | 78,890    |

|                                                                                                                                                    |                                                          |         |
|----------------------------------------------------------------------------------------------------------------------------------------------------|----------------------------------------------------------|---------|
| S18                                                                                                                                                | TI computer* AND AB computer*                            | 9,388   |
| S17                                                                                                                                                | (MH "Electronic Health Records+")                        | 26,300  |
| S16                                                                                                                                                | (MH "Patient Record Systems+")                           | 34,339  |
| S15                                                                                                                                                | (MH "Telemedicine+")                                     | 15,487  |
| S14                                                                                                                                                | (MH "Mobile Applications")                               | 8,506   |
| S13                                                                                                                                                | (MH "Smartphone")                                        | 2,987   |
| S12                                                                                                                                                | (MH "Cellular Phone")                                    | 1,971   |
| S11                                                                                                                                                | (MH "Software")                                          | 29,588  |
| S10                                                                                                                                                | (MH "Internet")                                          | 50,622  |
| S9                                                                                                                                                 | (MH "Informatics+")                                      | 899,135 |
| S8                                                                                                                                                 | (MH "Information Systems+")                              | 197,429 |
| S7                                                                                                                                                 | (MH "Computers and Computerization+")                    | 746,390 |
| S6                                                                                                                                                 | S1 OR S2 OR S3 OR S4 OR S5                               | 173,388 |
| S5                                                                                                                                                 | TI (decision* N2 aid*) OR AB (decision* N2 aid*)         | 3,509   |
| S4                                                                                                                                                 | TI (decision* N2 support*) OR AB (decision* N2 support*) | 11,135  |
| S3                                                                                                                                                 | TI (decision* N2 making) OR AB (decision* N2 making)     | 68,249  |
| S2                                                                                                                                                 | (MH "Decision Support Techniques")                       | 6,986   |
| S1                                                                                                                                                 | (MH "Decision Making+")                                  | 111,200 |
| *, Interface - EBSCOhost Research Databases, Search Screen - Advanced Search, Database - CINAHL, Limiters/Expanders: Search modes - Boolean/Phrase |                                                          |         |

## 7. Cochrane Library search strategy

- 
- #1 MeSH descriptor: [Decision Making] explode all trees 3960
- #2 MeSH descriptor: [Decision Support Techniques] explode all trees 2466
- #3 (decision\* near/2 making):ti,ab,kw (Word variations have been searched) 14369
- #4 ((decision\* near/2 support\*)):ti,ab,kw (Word variations have been searched) 3552

1  
2  
3 #5 (decision\* near/2 aid\*):ti,ab,kw (Word variations have been  
4 searched) 1657  
5  
6 #6 {or #1-#5} 20279  
7  
8 #7 MeSH descriptor: [Computers] explode all trees 1732  
9  
10 #8 MeSH descriptor: [Information Systems] explode all trees 2293  
11  
12 #9 MeSH descriptor: [Informatics] explode all trees 8936  
13  
14 #10 MeSH descriptor: [Patient Portals] this term only 19  
15  
16 #11 MeSH descriptor: [Software] this term only 940  
17  
18 #12 MeSH descriptor: [Mobile Applications] this term only 686  
19  
20 #13 MeSH descriptor: [Cell Phone] explode all trees 1710  
21  
22 #14 MeSH descriptor: [Telemedicine] explode all trees 2649  
23  
24 #15 MeSH descriptor: [Medical Records Systems, Computerized] this term  
25 only 196  
26  
27 #16 MeSH descriptor: [Electronic Health Records] 1 tree(s) exploded 359  
28  
29 #17 (computer\*):ti,ab,kw (Word variations have been searched) 47867  
30  
31 #18 (electronic\*):ti,ab,kw (Word variations have been searched) 17343  
32  
33 #19 (internet or web or online or on-line):ti,ab,kw (Word variations  
34 have been searched) 32321  
35  
36 #20 (software or "computer program\*"):ti,ab,kw (Word variations have  
37 been searched) 24140  
38  
39 #21 (automate\* or automation):ti,ab,kw (Word variations have been  
40 searched) 8858  
41  
42 #22 (pda or pdas):ti,ab,kw (Word variations have been searched) 1067  
43  
44 #23 ("personal digital assistant\*"):ti,ab,kw (Word variations have been  
45 searched) 168  
46  
47 #24 ((app or apps)):ti,ab,kw (Word variations have been searched)  
48 4858  
49  
50 #25 (application\* near/2 mobile\*):ti,ab,kw (Word variations have been  
51 searched) 2489  
52  
53 #26 ((iPad\* or iPhone\* or smartphone\* or "smart phone\*" or "smart  
54 device\*" or "android phone" or "cellphone\*" or "cell phone\*")):ti,ab,kw  
55 (Word variations have been searched) 6453  
56  
57 #27 ((tablet near/2 (pc or device\* or comput\*))) :ti,ab,kw (Word  
58 variations have been searched) 936  
59  
60 #28 (("hand held" or handheld) near/2 (pc or device\* or  
comput\*)):ti,ab,kw 720

- 1  
2  
3 #29 ((telehealth or telecare or telemedicine or eHealth or  
4 mHealth)):ti,ab,kw (Word variations have been searched) 6874  
5  
6 #30 {or #7-#29} 124876  
7  
8 #31 #6 and #30 7180  
9  
10 #32 MeSH descriptor: [Decision Making, Computer-Assisted] explode all  
11 trees 4237  
12  
13 #33 MeSH descriptor: [Decision Support Systems, Clinical] this term only  
14 380  
15  
16 #34 ((computer assisted near/2 (decision\* or diagnos\* or therap\* or  
17 support or treatment\* or management))):ti,ab,kw (Word variations have been  
18 searched) 2996  
19  
20 #35 ((computer aided near/2 (decision\* or diagnos\* or therap\* or support  
21 or treatment\* or management))):ti,ab,kw (Word variations have been  
22 searched) 191  
23  
24 #36 ((decision near/2 support near/2 (system\* or tool\*))):ti,ab,kw (Word  
25 variations have been searched) 1893  
26  
27 #37 ((decision making near/2 (system\* or tool\*))):ti,ab,kw (Word  
28 variations have been searched) 241  
29  
30 #38 MeSH descriptor: [Expert Systems] this term only 58  
31  
32 #39 ((expert near/2 system\*)):ti,ab,kw (Word variations have been  
33 searched) 243  
34  
35 #40 MeSH descriptor: [Reminder Systems] this term only 953  
36  
37 #41 (((computer\* or electronic\*) near/2 (reminder\* or alert\*)):ti,ab,kw  
38 (Word variations have been searched) 445  
39  
40 #42 (reminder system\*):ti,ab,kw (Word variations have been searched)  
41 2798  
42  
43 #43 ((medication or medicine or treatment or therapy) near/2 (reminder\*  
44 or alert)):ti,ab,kw 339  
45  
46 #44 MeSH descriptor: [Medical Order Entry Systems] this term only 67  
47  
48 #45 (((computer\* or electronic\*) near/2 order entry)):ti,ab,kw (Word  
49 variations have been searched) 119  
50  
51 #46 (computer\* near/2 "decision support\*") 476  
52  
53 #47 {or #32-#46} 10556  
54  
55 #48 #31 or #47 15798  
56  
57 #49 MeSH descriptor: [Allied Health Personnel] this term only 273  
58  
59 #50 MeSH descriptor: [Allied Health Occupations] this term only 7  
60  
#51 MeSH descriptor: [Physical Therapist Assistants] this term only 2



- 1  
2  
3 #52 MeSH descriptor: [Physical Therapy Specialty] this term only 120  
4  
5 #53 MeSH descriptor: [Speech-Language Pathology] this term only 67  
6  
7 #54 MeSH descriptor: [Occupational Therapy] this term only 775  
8  
9 #55 MeSH descriptor: [Nutritionists] this term only 44  
10  
11 #56 MeSH descriptor: [Dietetics] this term only 96  
12  
13 #57 MeSH descriptor: [Anesthesiologists] this term only 36  
14  
15 #58 MeSH descriptor: [Podiatry] this term only 39  
16  
17 #59 MeSH descriptor: [Osteopathic Physicians] this term only 3  
18  
19 #60 (anesthesiologist\*):ti,ab,kw 7826  
20  
21 #61 (podiatrist\*):ti,ab,kw 116  
22  
23 #62 (prosthetist\*):ti,ab,kw 35  
24  
25 #63 (chiropractist\*):ti,ab,kw 10  
26  
27 #64 (orthoptist\*):ti,ab,kw 43  
28  
29 #65 (orthotist\*):ti,ab,kw 32  
30  
31 #66 (osteopath\*):ti,ab,kw 753  
32  
33 #67 (radiographer\*):ti,ab,kw 132  
34  
35 #68 ("art therapist\*"):ti,ab,kw 12  
36  
37 #69 ("music therapist\*"):ti,ab,kw 137  
38  
39 #70 (" drama therapist\*"):ti,ab,kw 2  
40  
41 #71 ((allied near/2 health near/2 (profession\* or worker\* or personnel  
42 or occupation\* or staff))):ti,ab,kw (Word variations have been searched)  
43 472  
44  
45 #72 (((physical or occupational or language or speech) near/  
46 therapist\*)):ti,ab,kw (Word variations have been searched) 31090  
47  
48 #73 (physiotherapist\*):ti,ab,kw (Word variations have been searched)  
49 5252  
50  
51 #74 (dietitian\*):ti,ab,kw (Word variations have been searched) 2027  
52  
53 #75 (nutritionist\*):ti,ab,kw (Word variations have been searched) 715  
54  
55 #76 MeSH descriptor: [Patient Care Team] this term only 1700  
56  
57 #77 (((multidisciplinary or "multi-disciplinary" or interdisciplinary or  
58 multiprofessional or "multi-professional" or interprofessional) near/2  
59 team\*)):ti,ab,kw (Word variations have been searched) 2422  
60  
#78 MeSH descriptor: [Emergency Medical Technicians] this term only 171



1  
2  
3 #79 MeSH descriptor: [Emergency Medical Services] this term only  
4 1009  
5  
6 #80 MeSH descriptor: [Air Ambulances] this term only 41  
7  
8 #81 (paramedic\*):ti,ab,kw (Word variations have been searched) 1181  
9  
10 #82 (HEMS):ti,ab,kw (Word variations have been searched) 242  
11  
12 #83 (ems):ti,ab,kw (Word variations have been searched) 2707  
13  
14 #84 (emt):ti,ab,kw (Word variations have been searched) 294  
15  
16 #85 (prehospital):ti,ab,kw (Word variations have been searched) 1778  
17  
18 #86 (pre-hospital):ti,ab,kw (Word variations have been searched) 672  
19  
20 #87 ("first responder\*"):ti,ab,kw (Word variations have been searched)  
21 147  
22  
23 #88 ("emergency medical technician\*"):ti,ab,kw (Word variations have  
24 been searched) 277  
25  
26 #89 ("emergency services"):ti,ab,kw (Word variations have been searched)  
27 2743  
28  
29 #90 (ambulance\*):ti,ab,kw (Word variations have been searched) 989  
30  
31 #91 ("field triage"):ti,ab,kw (Word variations have been searched) 6  
32  
33 #92 ("out-of-hospital"):ti,ab,kw (Word variations have been searched)  
34 1776  
35  
36 #93 MeSH descriptor: [Nursing] explode all trees 3292  
37  
38 #94 MeSH descriptor: [Nursing Care] explode all trees 1788  
39  
40 #95 MeSH descriptor: [Nursing Staff] explode all trees 648  
41  
42 #96 (nurse or nurses or nursing):ti,ab,kw (Word variations have been  
43 searched) 41946  
44  
45 #97 MeSH descriptor: [Midwifery] this term only 329  
46  
47 #98 (midwif\* or midwiv\*):ti,ab,kw (Word variations have been searched)  
48 2309  
49  
50 #99 {or #49-#98} 99097  
51  
52 #100 #48 AND #99 2266  
53  
54  
55  
56  
57  
58  
59  
60  
Cochrane Database of Systematic Reviews = 58 Cochrane Trials =2205

## 8. Social Science Citation Index Search Strategy

---

| # | Search terms | Results |
|---|--------------|---------|
|---|--------------|---------|

|    |                                                                                                                                                                                                                                                                                                                                                                                                                                                                                                                                                                                                                                                                                                                                                                                                                                                                                                                                                                                                              |         |
|----|--------------------------------------------------------------------------------------------------------------------------------------------------------------------------------------------------------------------------------------------------------------------------------------------------------------------------------------------------------------------------------------------------------------------------------------------------------------------------------------------------------------------------------------------------------------------------------------------------------------------------------------------------------------------------------------------------------------------------------------------------------------------------------------------------------------------------------------------------------------------------------------------------------------------------------------------------------------------------------------------------------------|---------|
| #7 | #6 AND #5                                                                                                                                                                                                                                                                                                                                                                                                                                                                                                                                                                                                                                                                                                                                                                                                                                                                                                                                                                                                    | 2,297   |
| #6 | TS=(((("allied health" NEAR/2 (profession* OR worker* OR personnel OR occupation* OR staff) ) OR ("physical therapist" OR "physical therapists") OR ("occupational therapist" OR "occupational therapists") OR ("language therapist" OR "language therapists") OR ("speech therapist" OR "speech therapists") ) OR (physiotherapist* OR dietitian* OR dietetics OR nutritionist* or "music therapist*" or anesthesiologist* or orthoptist* or chiropodist* or podiatrist* or osteopath* or prosthetist* or orthotist* or radiographer* or "art therapist*" or "drama therapist*") OR ((multidisciplinary OR "multi-disciplinary" or interdisciplinary OR multiprofessional OR "multi-professional" or interprofessional) NEAR/2 team*) OR (nurse OR nurses OR nursing or paramedic* or HEMS or EMS or EMT or prehospital or "pre-hospital" or "first responder*" or "emergency medical technician*" or "emergency services" or ambulance* or "field triage" or "out-of-hospital" or midwif* or midwiv* ) ))) | 228,344 |
| #5 | #4 AND #3                                                                                                                                                                                                                                                                                                                                                                                                                                                                                                                                                                                                                                                                                                                                                                                                                                                                                                                                                                                                    | 34,209  |
| #4 | TS(("computer assisted decision*" OR "computer assisted diagnos*" OR "computer assisted therap*") OR ("computer aided decision*" OR "computer aided diagnos*" OR "computer aided therap*" or "computer aided support" or "computer aided treatment*" or "computer aided management" or "computer assisted support" or "computer assisted treatment*" OR "computer assisted management") OR ("decision support system*" OR "decision support or tool*") OR ("decision making system*" OR "decision making tool*") OR (expert NEAR/2 system*) OR (computer* NEAR/2 reminder* OR computer NEAR/2 alert* OR electronic* NEAR/2 reminder* OR electronic* NEAR/2 alert*) OR "reminder system*" OR "medical Order Entry System*" OR (computer* NEAR/2 "order entry") OR (electronic* NEAR/2 "order entry") OR (computer* near/2 "decision making") OR (medication or medicine or treatment or therapy) Near/2 (reminder* or alert*) )                                                                               | 13,896  |
| #3 | #2 AND #1                                                                                                                                                                                                                                                                                                                                                                                                                                                                                                                                                                                                                                                                                                                                                                                                                                                                                                                                                                                                    | 21,872  |
| #2 | TS=(((computer* OR electronic* OR internet OR web OR online OR on-line OR software OR computer program* OR automate* OR automation OR pda OR pdas OR "personal digital assistant*") OR (app OR apps OR application* NEAR/2 mobile* OR iPad* OR iPhone* OR smartphone* OR ("smart phone" OR "smart phones") OR ("smart device" OR "smart devices") ) OR ( "android phone*" or cellphone* or "cell phone*") OR (tablet NEAR/2 (pc OR device* OR comput*) ) OR (telehealth OR telecare OR telemedicine or mhealth or ehealth) )))                                                                                                                                                                                                                                                                                                                                                                                                                                                                               | 438,284 |

|    |                                                                                                     |         |
|----|-----------------------------------------------------------------------------------------------------|---------|
| #1 | ((decision* near/2 making) OR TOPIC: (decision* near/2 support*) OR TOPIC: (decision* near/2 aid* ) | 190,122 |
|----|-----------------------------------------------------------------------------------------------------|---------|

## 9. Search Strategy Proquest ASSIA and Dissertations & Theses Abstracts & Index

ab((((decision\* NEAR/2 making) OR (decision\* NEAR/2 support\*) OR (decision\* NEAR/2 aid\*)) AND ((computer\* OR electronic\* OR internet OR web OR online OR on-line OR software OR computer program\* OR automate\* OR automation OR pda OR pdas OR "personal digital assistant\*") OR (app OR apps OR application\* NEAR/2 mobile\* OR iPad\* OR iPhone\* OR smartphone\* OR ("smart phone" OR "smart phones") OR ("smart device" OR "smart devices")) OR (tablet NEAR/2 (pc OR device\* OR comput\*)) OR (telehealth OR telecare OR telemedicine))) OR (("computer assisted decision\*" OR "computer assisted diagnos\*" OR "computer assisted therap\*" OR ("computer aided decision\*" OR "computer aided diagnos\*" OR "computer aided therap\*") OR ("decision support system\*" OR "decision support or tool\*") OR ("decision making system\*" OR "decision making tool\*") OR (expert NEAR/2 system\*) OR (computer\* NEAR/2 reminder\* OR computer NEAR/2 alert\* OR electronic\* NEAR/2 reminder\* OR electronic\* NEAR/2 alert\*) OR "reminder system\*" OR "medical Order Entry System\*" OR (computer\* NEAR/2 "order entry" OR electronic\* NEAR/2 "order entry")))) AND (("allied health" NEAR/2 (profession\* OR worker\* OR personnel OR occupation\* OR staff)) OR (("physical therapist" OR "physical therapists") OR ("occupational therapist" OR "occupational therapists") OR ("language therapist" OR "language therapists") OR ("speech therapist" OR "speech therapists")) OR (physiotherapist\* OR dietitian\* OR dietetics OR nutritionist\*) OR ((multidisciplinary OR interdisciplinary OR multiprofessional OR interprofessional) NEAR/2 team\*) OR (nurse OR nurses OR nursing or paramedic\* or HEMS or EMS or EMT or prehospital or "pre-hospital" or "first responder\*" or "emergency medical technician\*" or "emergency services" or ambulance\* or "field triage" or "out-of-hospital" or midwif\* or midwiv\* ))) OR ti((((decision\* NEAR/2 making) OR (decision\* NEAR/2 support\*) OR (decision\* NEAR/2 aid\*)) AND ((computer\* OR electronic\* OR internet OR web OR online OR on-line OR software OR computer program\* OR automate\* OR automation OR pda OR pdas OR "personal digital assistant\*") OR (app OR apps OR application\* NEAR/2 mobile\* OR iPad\* OR iPhone\* OR smartphone\* OR ("smart phone" OR "smart phones") OR ("smart device" OR "smart devices")) OR (tablet NEAR/2 (pc OR device\* OR comput\*)) OR (telehealth OR telecare OR telemedicine))) OR (("computer assisted decision\*" OR "computer assisted diagnos\*" OR "computer assisted therap\*" OR ("computer aided decision\*" OR "computer aided diagnos\*" OR "computer aided therap\*") OR ("decision support system\*" OR "decision support or tool\*") OR ("decision making system\*" OR "decision making tool\*") OR (expert NEAR/2 system\*) OR (computer\* NEAR/2 reminder\* OR computer NEAR/2 alert\* OR electronic\* NEAR/2 reminder\* OR electronic\* NEAR/2 alert\*) OR "reminder system\*" OR "medical Order Entry System\*" OR (computer\* NEAR/2 "order entry" OR electronic\* NEAR/2 "order entry")))) AND (("allied health" NEAR/2 (profession\* OR worker\* OR personnel OR occupation\* OR staff)) OR (("physical therapist" OR "physical therapists") OR ("occupational therapist" OR "occupational therapists") OR ("language therapist" OR "language therapists") OR ("speech therapist" OR "speech therapists")) OR (physiotherapist\* OR dietitian\* OR dietetics OR nutritionist\*) OR ((multidisciplinary OR interdisciplinary OR multiprofessional OR interprofessional) NEAR/2 team\*) OR (nurse OR nurses OR nursing or paramedic\* or HEMS or EMS or EMT or prehospital or "pre-hospital" or "first responder\*" or "emergency medical technician\*" or "emergency services" or ambulance\* or "field triage" or "out-of-hospital" or midwif\* or midwiv\* )))

1  
2  
3 **10. Search strategies -Clinicaltrials.gov, ICTRP, OpenGrey, OpenClinical, HealthIT.gov, Agency**  
4 **for Healthcare Research and Quality Health Information Technology website**  
5

---

6  
7 Search 1: Decision\* AND computer\*

8  
9  
10  
11 Search 2: Decision\* AND web\*

12  
13  
14  
15 Search 3: Decision\* AND online

16  
17  
18  
19 Search 4: Decision\* AND software

20  
21  
22 Search 5: Decision\* AND device\*

23  
24 Search 6: Decision\* AND mobile\*

25  
26  
27  
28 **11. Search strategy Health Services Research Projects in Progress**  
29

30  
31 (decision\*) AND (computer\* OR web\* OR online OR software OR device\* OR mobile\* AND allied OR  
32 therapist\* OR occupational OR therap\* OR physiotherapist OR physiotherapy))  
33  
34  
35  
36  
37  
38  
39  
40  
41  
42  
43  
44  
45  
46  
47  
48  
49  
50  
51  
52  
53  
54  
55  
56  
57  
58  
59  
60

**Supplementary Table 2: Risk of Bias assessment justifications using Effective Practice Organisation of Care (EPOC)'s tool**

## 1. Randomised controlled trials, non-randomised trials and controlled before-after studies

| Random sequence generation                                      | Allocation concealment                          | Baseline outcome measurements similar             | Baseline characteristics similar                                                                      | Incomplete outcome data                                                              | Knowledge of the allocated interventions adequately prevented during the study | Protection against contamination                                                                                                          | Selective outcome reporting                                                       | Other bias                                    | Overall bias score |
|-----------------------------------------------------------------|-------------------------------------------------|---------------------------------------------------|-------------------------------------------------------------------------------------------------------|--------------------------------------------------------------------------------------|--------------------------------------------------------------------------------|-------------------------------------------------------------------------------------------------------------------------------------------|-----------------------------------------------------------------------------------|-----------------------------------------------|--------------------|
| <b>Beeckman et al, 2013</b>                                     |                                                 |                                                   |                                                                                                       |                                                                                      |                                                                                |                                                                                                                                           |                                                                                   |                                               |                    |
| "Simple randomisation was used to allocate nurses and patients" | Nurses and residents knew their allocated group | Reported baseline outcomes are broadly similar    | Baseline characteristics balanced/similar                                                             | No information if there was a problem of missing data or ways of handling it, if any | Assessors were not blinded                                                     | Intervention was allocated nursing homes, not individual patients                                                                         | All relevant outcomes in the methods section are reported in the results section  | There is no evidence of other risk of biases  | High               |
| <b>Blaha et al, 2009</b>                                        |                                                 |                                                   |                                                                                                       |                                                                                      |                                                                                |                                                                                                                                           |                                                                                   |                                               |                    |
| Not specified in paper.                                         | Not specified in paper.                         | No significant differences in glucose at baseline | Although reported for patients, baseline characteristics of nurses is not reported in text or tables. | Only 11 of 120 patients missing (9%)                                                 | The outcomes are objective.                                                    | Professionals were allocated within a clinic or practice and it is possible that communication between the two groups could have occurred | All relevant outcomes in the methods section are reported in the results section. | There is no evidence of other risk of biases. | Unclear            |
| <b>Byrne,2005</b>                                               |                                                 |                                                   |                                                                                                       |                                                                                      |                                                                                |                                                                                                                                           |                                                                                   |                                               |                    |
| Controlled before-after study.                                  | Controlled before-after study.                  | Models adjusted for covariates.                   | No report of baseline characteristics of patients or Nurses involved.                                 | Not specified in the paper.                                                          | Not specified in the paper.                                                    | Unit of allocation was the nursing home                                                                                                   | All relevant outcomes in the methods section are reported in the results section. | Multiple comparison                           | High               |
| <b>Canbolat et al,2019 (NRCT)</b>                               |                                                 |                                                   |                                                                                                       |                                                                                      |                                                                                |                                                                                                                                           |                                                                                   |                                               |                    |

| Random sequence generation                   | Allocation concealment                                 | Baseline outcome measurements similar                                             | Baseline characteristics similar                                                                                    | Incomplete outcome data                                           | Knowledge of the allocated interventions adequately prevented during the study | Protection against contamination                                                                                                                                          | Selective outcome reporting                                                       | Other bias                                                                    | Overall bias score |
|----------------------------------------------|--------------------------------------------------------|-----------------------------------------------------------------------------------|---------------------------------------------------------------------------------------------------------------------|-------------------------------------------------------------------|--------------------------------------------------------------------------------|---------------------------------------------------------------------------------------------------------------------------------------------------------------------------|-----------------------------------------------------------------------------------|-------------------------------------------------------------------------------|--------------------|
| Is Non-randomised trial.                     | It is an open label study.                             | No baseline measure of outcomes reported.                                         | No baseline information reported about the providers (Nurses); difference baseline characteristics patients present | Not specified in the paper.                                       | Not specified in the paper.                                                    | There was no randomisation; control and intervention groups were from the same clinic. Therefore, it is highly likely that control group could have received intervention | All relevant outcomes are reported in the results section.                        | No baseline (pre-intervention) outcomes data available so difficult to judge. | High               |
| <b>Cavalcanti et al, 209</b>                 |                                                        |                                                                                   |                                                                                                                     |                                                                   |                                                                                |                                                                                                                                                                           |                                                                                   |                                                                               |                    |
| 'Random numbers were generated by computer.' | 'Allocation was by centres at the start of the study.' | No baseline measure of outcomes reported in the paper.                            | Clinically significant differences in patients at baseline; no baseline information about HPs.                      | Outcomes reported were based on all participants (complete data). | Not specified in the paper.                                                    | Not specified in the paper.                                                                                                                                               | All relevant outcomes in the methods section are reported in the results section. | No evidence of other sources of bias.                                         | High               |
| <b>Cleveringa et al,2008</b>                 |                                                        |                                                                                   |                                                                                                                     |                                                                   |                                                                                |                                                                                                                                                                           |                                                                                   |                                                                               |                    |
| Block randomisation by practices and Nurses. | Unit of allocation was by practice.                    | Baseline outcomes were largely similar among the intervention and control groups. | Clinically significant differences in patients at baseline; no baseline information about HPs.                      | 'Values carried forward method' was used but not ideal method.    | Not specified in the paper.                                                    | Allocation unit was practice so unlikely that the control group received an intervention.                                                                                 | All relevant outcomes discussed in the objective are reported.                    | No evidence of other risk of biases.                                          | High               |

| Random sequence generation                  | Allocation concealment                                  | Baseline outcome measurements similar                       | Baseline characteristics similar                                            | Incomplete outcome data          | Knowledge of the allocated interventions adequately prevented during the study                                          | Protection against contamination                                                               | Selective outcome reporting                                                       | Other bias                           | Overall bias score |
|---------------------------------------------|---------------------------------------------------------|-------------------------------------------------------------|-----------------------------------------------------------------------------|----------------------------------|-------------------------------------------------------------------------------------------------------------------------|------------------------------------------------------------------------------------------------|-----------------------------------------------------------------------------------|--------------------------------------|--------------------|
| <b>Cleveringa et al,2010</b>                |                                                         |                                                             |                                                                             |                                  |                                                                                                                         |                                                                                                |                                                                                   |                                      |                    |
| Not specified in the paper.                 | Unit of allocation was primary care practice.           | Baseline outcome measurements are largely similar.          | There is no report of baseline characteristics of Nurses in text or tables. | Use of electronic health records | Not specified in the paper.                                                                                             | Allocation was by primary care practices so unlikely that control group received intervention. | All relevant outcomes set out in the objective were reported.                     | No evidence of other risk of biases. | High               |
| <b>Cortez, 2014</b>                         |                                                         |                                                             |                                                                             |                                  |                                                                                                                         |                                                                                                |                                                                                   |                                      |                    |
| Not specified in the paper.                 | Allocation was based on clinic and nurses.              | Outcome measurements were different among the two groups    | Baseline characteristics were largely similar in both groups.               | Use of electronic health records | 'The study participants (nurses) did not know about the other group's usage of CDSS at the start and during the study.' | Nurses in the intervention group did not know about or receive CDSS during study.              | All relevant outcomes in the methods section are reported in the results section. | No evidence of other risk of biases. | High               |
| <b>Dalaba et al, 2015</b>                   |                                                         |                                                             |                                                                             |                                  |                                                                                                                         |                                                                                                |                                                                                   |                                      |                    |
| A controlled before-after study.            | A controlled before-after study.                        | Baseline outcome measurements were significantly different. | No report of baseline characteristics of HPs in text or tables              | Not specified in the paper.      | Not specified in the paper.                                                                                             | Comparison groups were in different districts.                                                 | All outcomes mentioned in the methods section have been reported.                 | No indication of other biases.       | High               |
| <b>Duclos et al,2015</b>                    |                                                         |                                                             |                                                                             |                                  |                                                                                                                         |                                                                                                |                                                                                   |                                      |                    |
| Randomisation computer generated centrally. | Allocation was by department at the start of the study. | Baseline outcome measures appear to be                      | Only aggregated baseline characteristics of children for                    | Medical records were used.       | Not specified in the paper.                                                                                             | Not specified in the paper.                                                                    | All relevant outcomes in the methods section are reported in the results section. | No indication of other biases.       | High               |

1  
2  
3  
4  
5  
6  
7  
8  
9  
10  
11  
12  
13  
14  
15  
16  
17  
18  
19  
20  
21  
22  
23  
24  
25  
26  
27  
28  
29  
30  
31  
32  
33  
34  
35  
36  
37  
38  
39  
40  
41  
42  
43  
44  
45  
46

| Random sequence generation     | Allocation concealment                                                  | Baseline outcome measurements similar                | Baseline characteristics similar                                                                                           | Incomplete outcome data     | Knowledge of the allocated interventions adequately prevented during the study                         | Protection against contamination                                                                                                        | Selective outcome reporting                    | Other bias                                                                                | Overall bias score |
|--------------------------------|-------------------------------------------------------------------------|------------------------------------------------------|----------------------------------------------------------------------------------------------------------------------------|-----------------------------|--------------------------------------------------------------------------------------------------------|-----------------------------------------------------------------------------------------------------------------------------------------|------------------------------------------------|-------------------------------------------------------------------------------------------|--------------------|
|                                |                                                                         | different and were not adjusted for during analysis. | the intervention and control groups; and, no report about the HP participants' baseline characteristics in tables or text. |                             |                                                                                                        |                                                                                                                                         |                                                |                                                                                           |                    |
| <b>Dumont et al, 2012</b>      |                                                                         |                                                      |                                                                                                                            |                             |                                                                                                        |                                                                                                                                         |                                                |                                                                                           |                    |
| Simple randomisation used      | Randomisation was achieved by a Nurse choosing unmarked sealed envelope | No baseline measure of outcome reported.             | Patient characteristics reported and largely similar, but report on HP were presented as aggregated.                       | Not specified in the paper. | Not specified in the paper.                                                                            | Nurses were allocated within a clinic and it is possible that communication between intervention and control nurse could have occurred. | All outcomes in methods section were reported. | Performance bias risk from knowledge of cases, protocols and contamination highly likely. | High               |
| <b>Dykes et al, 2009</b>       |                                                                         |                                                      |                                                                                                                            |                             |                                                                                                        |                                                                                                                                         |                                                |                                                                                           |                    |
| Not specified in the paper     | Allocation was by unit at the start of the study                        | Baseline outcome measurements are largely similar.   | Patient characteristics were similar, but no information on HPs.                                                           | Medical records were used.  | Study noted as open-label design in the protocol; and, intervention and control units in one hospital. | Contamination of information highly likely; patients rather than professionals were randomised                                          | All outcomes in methods section were reported. | No indication of other biases.                                                            | High               |
| <b>Fitzmaurice et al, 2000</b> |                                                                         |                                                      |                                                                                                                            |                             |                                                                                                        |                                                                                                                                         |                                                |                                                                                           |                    |



| Random sequence generation                       | Allocation concealment                   | Baseline outcome measurements similar                      | Baseline characteristics similar                                                                          | Incomplete outcome data                 | Knowledge of the allocated interventions adequately prevented during the study | Protection against contamination                                                          | Selective outcome reporting                                                                    | Other bias                                                                                        | Overall bias score |
|--------------------------------------------------|------------------------------------------|------------------------------------------------------------|-----------------------------------------------------------------------------------------------------------|-----------------------------------------|--------------------------------------------------------------------------------|-------------------------------------------------------------------------------------------|------------------------------------------------------------------------------------------------|---------------------------------------------------------------------------------------------------|--------------------|
| 'Randomisation was computer generated.'          | Not specified in the paper               | Baseline outcome measurements are largely similar.         | There is no report of baseline characteristics of HPs in text or tables                                   | Use of medical records.                 | Outcomes are objective.                                                        | Groups in same practice— possibility of communication between health professionals        | All relevant outcomes in the introduction/methods section are reported in the results section. | No evidence of other risk of biases.                                                              | High               |
| <b>Forberg et al,2016</b>                        |                                          |                                                            |                                                                                                           |                                         |                                                                                |                                                                                           |                                                                                                |                                                                                                   |                    |
| 'A simple draw from the list by a third person.' | Not specified in the paper               | Baseline measure of outcomes appear to be largely similar. | Baseline characteristics of the intervention and control groups are similar.                              | Missing outcomes is very minimal (<2%). | Not specified in the paper.                                                    | Not clear that nurses did not swap between units within the same hospital.                | All relevant outcomes in the methods section are reported in the results section.              | No evidence of other risk of biases.                                                              | High               |
| <b>Fossum et al,2011</b>                         |                                          |                                                            |                                                                                                           |                                         |                                                                                |                                                                                           |                                                                                                |                                                                                                   |                    |
| Controlled before-after study                    | Controlled before-after study            | Baseline outcome measurements are largely similar.         | Although reported for patients, baseline characteristics of providers was not reported in text or tables. | Use medical records.                    | Not specified in the paper.                                                    | Allocation was by nursing homes and is unlikely that control group received intervention. | All relevant outcomes in the methods section are reported in the results section.              | No evidence of other risk of biases.                                                              | High               |
| <b>Geurts et al, 2016</b>                        |                                          |                                                            |                                                                                                           |                                         |                                                                                |                                                                                           |                                                                                                |                                                                                                   |                    |
| 'Computer generated randomisation was used.'     | 'Centralised randomisation scheme used.' | No baseline measure of outcome in the paper.               | Baseline characteristics are largely similar among the two groups.                                        | Medical records used.                   | 'Nurses were blinded for the contribution of predictors on the risk score.'    | Patient based randomisation; a high possibility. Intra clinician and inter clinician      | All relevant outcomes in the methods section are reported in the results section.              | Question about representativeness of final study sample as 75% of eligible kids not randomised as | High               |

1  
2  
3  
4  
5  
6  
7  
8  
9  
10  
11  
12  
13  
14  
15  
16  
17  
18  
19  
20  
21  
22  
23  
24  
25  
26  
27  
28  
29  
30  
31  
32  
33  
34  
35  
36  
37  
38  
39  
40  
41  
42  
43  
44  
45  
46

| Random sequence generation                                               | Allocation concealment                                                                              | Baseline outcome measurements similar                 | Baseline characteristics similar                                                                                    | Incomplete outcome data             | Knowledge of the allocated interventions adequately prevented during the study | Protection against contamination                                                                  | Selective outcome reporting                                                       | Other bias                             | Overall bias score |
|--------------------------------------------------------------------------|-----------------------------------------------------------------------------------------------------|-------------------------------------------------------|---------------------------------------------------------------------------------------------------------------------|-------------------------------------|--------------------------------------------------------------------------------|---------------------------------------------------------------------------------------------------|-----------------------------------------------------------------------------------|----------------------------------------|--------------------|
|                                                                          |                                                                                                     |                                                       |                                                                                                                     |                                     |                                                                                | contamination highly possible.                                                                    |                                                                                   | professional or parents non-compliant. |                    |
| <b>Hovorka et al, 2007</b>                                               |                                                                                                     |                                                       |                                                                                                                     |                                     |                                                                                |                                                                                                   |                                                                                   |                                        |                    |
| 'randomisation based on computer algorithm'                              | Centralised randomisation scheme was used.                                                          | No baseline measure of outcome reported in the paper. | Although some report about patients, no report of baseline characteristics about HP participants in text or tables. | Not specified in the paper.         | The outcomes were objective.                                                   | patients based randomisation; same clinicians involved in standard and intervention arms          | All relevant outcomes in the methods section are reported in the results section. | No evidence of other risk of biases.   | High               |
| <b>Kroth et al, 2006</b>                                                 |                                                                                                     |                                                       |                                                                                                                     |                                     |                                                                                |                                                                                                   |                                                                                   |                                        |                    |
| 'Randomisation using coin flip.'                                         | Not specified in the paper.                                                                         | No baseline measure of outcome.                       | There is no detailed report of characteristics in text or tables.                                                   | Consecutive [medical] records used. | objective outcome                                                              | Randomisation was for patients and nurses. Nurses in the control group did not receive reminders. | All relevant outcomes in the methods section are reported in the results section. | No evidence of other risk of biases.   | High               |
| <b>Lattimer et al, 1998</b>                                              |                                                                                                     |                                                       |                                                                                                                     |                                     |                                                                                |                                                                                                   |                                                                                   |                                        |                    |
| 'A random number generator pocket calculator (Hewlett Packard 21s) used' | Unit of allocation was by team and allocation was performed on all units at the start of the study. | No baseline measure of outcome reported.              | Some about patients, but no report of baseline characteristics HPs in text or tables.                               | Not specified in the paper.         | Use of medical records.                                                        | Health professionals in the intervention (Nurses) and control (Doctors) were different.           | All relevant outcomes in the methods section are reported in the results section. | No evidence of other risk of biases.   | Unclear            |

| Random sequence generation            | Allocation concealment      | Baseline outcome measurements similar                                            | Baseline characteristics similar                                     | Incomplete outcome data     | Knowledge of the allocated interventions adequately prevented during the study | Protection against contamination                                                                  | Selective outcome reporting                                                       | Other bias                           | Overall bias score |
|---------------------------------------|-----------------------------|----------------------------------------------------------------------------------|----------------------------------------------------------------------|-----------------------------|--------------------------------------------------------------------------------|---------------------------------------------------------------------------------------------------|-----------------------------------------------------------------------------------|--------------------------------------|--------------------|
| <b>Lattimer et al,2000</b>            |                             |                                                                                  |                                                                      |                             |                                                                                |                                                                                                   |                                                                                   |                                      |                    |
| Not specified in the paper.           | Not specified in the paper. | Not specified in the paper.                                                      | There is no detailed report of characteristics in text or tables     | Not specified in the paper. | Use of medical records.                                                        | Health professionals in the intervention (Nurses) and control (Doctors) were different.           | All relevant outcomes in the methods section are reported in the results section. | No evidence of other risk of biases. | <b>Unclear</b>     |
| <b>Lee et al, 2009</b>                |                             |                                                                                  |                                                                      |                             |                                                                                |                                                                                                   |                                                                                   |                                      |                    |
| Not specified in the paper.           | Not specified in the paper. | Although weight and BMI data were recorded, no data on the outcome measurements. | Reported for patients, but no report on providers in text or tables. | Not specified in the paper. | Not specified in the paper.                                                    | Patients based randomisation so it is likely that the control group received the intervention.    | All relevant outcomes in the methods section are reported in the results section. | No evidence of other risk of biases. | <b>High</b>        |
| <b>lv et al, 2019</b>                 |                             |                                                                                  |                                                                      |                             |                                                                                |                                                                                                   |                                                                                   |                                      |                    |
| Not specified in the paper.           | Not specified in the paper. | Not specified in the paper.                                                      | Reported for patients, but no report on providers in text or tables. | Not specified in the paper. | Not specified in the paper.                                                    | Patients based randomisation; Patient based randomisation; same clinicians involved in both arms. | All relevant outcomes in the methods section are reported in the results section. | No evidence of other risk of biases. | <b>High</b>        |
| <b>Mann et al,2011</b>                |                             |                                                                                  |                                                                      |                             |                                                                                |                                                                                                   |                                                                                   |                                      |                    |
| Computer generated sequence was used. | Not specified in the paper. | Baseline measure of outcome not reported.                                        | No baseline characteristics of HPs in text or tables were found.     | Not clear from the paper.   | A cross-over study; not specified in the paper.                                | Acrossover trial with only patients rather than professionals randomised.                         | All relevant outcomes in the methods section are reported in the results section. | No evidence of other risk of biases. | <b>High</b>        |

1  
2  
3  
4  
5  
6  
7  
8  
9  
10  
11  
12  
13  
14  
15  
16  
17  
18  
19  
20  
21  
22  
23  
24  
25  
26  
27  
28  
29  
30  
31  
32  
33  
34  
35  
36  
37  
38  
39  
40  
41  
42  
43  
44  
45  
46

| Random sequence generation              | Allocation concealment                        | Baseline outcome measurements similar                               | Baseline characteristics similar                                      | Incomplete outcome data               | Knowledge of the allocated interventions adequately prevented during the study | Protection against contamination                                                                                                     | Selective outcome reporting                                                       | Other bias                                                                                                                                                   | Overall bias score |
|-----------------------------------------|-----------------------------------------------|---------------------------------------------------------------------|-----------------------------------------------------------------------|---------------------------------------|--------------------------------------------------------------------------------|--------------------------------------------------------------------------------------------------------------------------------------|-----------------------------------------------------------------------------------|--------------------------------------------------------------------------------------------------------------------------------------------------------------|--------------------|
| <b>McDonald et al, 2017</b>             |                                               |                                                                     |                                                                       |                                       |                                                                                |                                                                                                                                      |                                                                                   |                                                                                                                                                              |                    |
| Automated block randomisation was used. | Automated block randomisation schema was used | Not specified in the paper.                                         | Baseline characteristics were largely similar.                        | Possible medical records use.         | Assessor was not blinded.                                                      | Both intervention and control nurses were in one organisation and it is possible that communication between them could have occurred | All relevant outcomes in the methods section are reported in the results section. | Only 42% of patients who should have had a CDSS applied suggesting that the nurses selectively chose which patients to use it with or selective non adoption | High               |
| <b>Paulson et al, 2020</b>              |                                               |                                                                     |                                                                       |                                       |                                                                                |                                                                                                                                      |                                                                                   |                                                                                                                                                              |                    |
| Automated block randomisation was used. | Automated block randomisation schema was used | Reported for patients, but no report on providers in text or tables | Baseline characteristics were largely similar                         | Only complete case analysis conducted | Outcomes are objective                                                         | Both intervention and control nurses were in one organisation and it is possible that communication between them could have occurred | All relevant outcomes in the methods section are reported in the results section. | No evidence of other risk of biases.                                                                                                                         | High               |
| <b>Plank et al, 2006</b>                |                                               |                                                                     |                                                                       |                                       |                                                                                |                                                                                                                                      |                                                                                   |                                                                                                                                                              |                    |
| Not specified in the paper              | Not specified in the paper                    | Blood glucose measured but not intervention group based             | Differences in types of surgery and history of diabetes between sites | Use of medical records.               | Outcomes are objective.                                                        | same units delivering all arms of the trial with same clinicians                                                                     | All relevant outcomes in the methods section are reported in the results section. | No evidence of other risk of biases.                                                                                                                         | High               |
| <b>Rood et al, 2005</b>                 |                                               |                                                                     |                                                                       |                                       |                                                                                |                                                                                                                                      |                                                                                   |                                                                                                                                                              |                    |

| Random sequence generation                     | Allocation concealment                                                                                                | Baseline outcome measurements similar                      | Baseline characteristics similar                                                      | Incomplete outcome data                                                                                | Knowledge of the allocated interventions adequately prevented during the study | Protection against contamination                                                                                                                                       | Selective outcome reporting                                                       | Other bias                           | Overall bias score |
|------------------------------------------------|-----------------------------------------------------------------------------------------------------------------------|------------------------------------------------------------|---------------------------------------------------------------------------------------|--------------------------------------------------------------------------------------------------------|--------------------------------------------------------------------------------|------------------------------------------------------------------------------------------------------------------------------------------------------------------------|-----------------------------------------------------------------------------------|--------------------------------------|--------------------|
| 'Automatic random number generating'           | Not specified in the paper                                                                                            | Baseline measure of outcome not reported.                  | No report of characteristics of HPs in text or tables.                                | Not specified in the paper.                                                                            | Not specified in the paper.                                                    | Patient based randomisation; same clinicians involved in both arms.                                                                                                    | There is no evidence that outcomes were selectively reported.                     | No evidence of other risk of biases. | High               |
| <b>Roukema et al,2008</b>                      |                                                                                                                       |                                                            |                                                                                       |                                                                                                        |                                                                                |                                                                                                                                                                        |                                                                                   |                                      |                    |
| Randomisation was based on computer algorithm. | 'centralised randomisation scheme'                                                                                    | Baseline measure of outcome not reported                   | No report of characteristics of HPs in text or tables.                                | Not specified in the paper.                                                                            | Not specified in the paper.                                                    | professionals were allocated within a clinic so hard to see how decision rule training effect not present in the clinicians who were delivering both arms of the trial | All relevant outcomes in the methods section are reported in the results section. | No evidence of other risk of biases. | High               |
| <b>Sassen et al,2014</b>                       |                                                                                                                       |                                                            |                                                                                       |                                                                                                        |                                                                                |                                                                                                                                                                        |                                                                                   |                                      |                    |
| Not specified in the paper.                    | The unit of allocation was by health professional and allocation was performed on all units at the start of the study | No important differences were present across study groups. | Baseline characteristics of the study and control providers are reported and similar. | Significant proportion participants dropped out and the report is based on the complete case analysis. | Outcomes cannot be assessed blindly.                                           | Participants in the control group did not have a log-in code to access the website (CDSS tool) until post-intervention data were collected.                            | All relevant outcomes in the methods section are reported in the results section. | No evidence of other risk of biases. | High               |
| <b>Snooks et al, 2014</b>                      |                                                                                                                       |                                                            |                                                                                       |                                                                                                        |                                                                                |                                                                                                                                                                        |                                                                                   |                                      |                    |

| Random sequence generation                 | Allocation concealment                                                  | Baseline outcome measurements similar     | Baseline characteristics similar                                              | Incomplete outcome data     | Knowledge of the allocated interventions adequately prevented during the study | Protection against contamination                                                                                   | Selective outcome reporting                                                       | Other bias                                                      | Overall bias score |
|--------------------------------------------|-------------------------------------------------------------------------|-------------------------------------------|-------------------------------------------------------------------------------|-----------------------------|--------------------------------------------------------------------------------|--------------------------------------------------------------------------------------------------------------------|-----------------------------------------------------------------------------------|-----------------------------------------------------------------|--------------------|
| Randomisation based on computer algorithm. | Random allocation was performed on all units at the start of the study. | No baseline measure of outcome reported.  | No report of characteristics in text or tables about the paramedics involved. | Not specified in the paper. | Analyst was blinded.                                                           | Intervention and control groups were in separates sites                                                            | All relevant outcomes in the methods section are reported in the results section. | No evidence of other risk of biases.                            | Unclear            |
| <b>Vadher et al, 1997</b>                  |                                                                         |                                           |                                                                               |                             |                                                                                |                                                                                                                    |                                                                                   |                                                                 |                    |
| Random tables were used.                   | Not specified in the paper.                                             | No baseline measure of outcome reported.  | Patient baseline characteristics reported; one nurse versus a clinician.      | Not specified in the paper. | Outcomes are objectively measured.                                             | Hard to see how same clinicians seeing both arm trial patients didn't pick up something from the CDSS.             | All relevant outcomes in the methods section are reported in the results section. | There was only one Nurse participant in the intervention group. | High               |
| <b>Wells,2013</b>                          |                                                                         |                                           |                                                                               |                             |                                                                                |                                                                                                                    |                                                                                   |                                                                 |                    |
| Random table was used for randomisation.   | Not specified in the paper.                                             | No baseline measure of outcomes reported. | Baseline characteristics are largely similar.                                 | Not specified in the paper. | Outcomes were assessed blindly.                                                | Intervention and control groups in the same site so it is likely that the control group received the intervention. | All relevant outcomes in the methods section are reported in the results section  | No evidence of other risk of biases.                            | High               |

Colour codes: Red, high risk; orange, unclear risk; green, low risk

## 2. Interrupted time series studies

| Author & Year      | Risk of bias domains and scores                                                                               |                                                                                        |                                                                                                |                                                                                |                                    |                                                                                   |                                      | Overall bias |
|--------------------|---------------------------------------------------------------------------------------------------------------|----------------------------------------------------------------------------------------|------------------------------------------------------------------------------------------------|--------------------------------------------------------------------------------|------------------------------------|-----------------------------------------------------------------------------------|--------------------------------------|--------------|
|                    | Intervention independent of other changes                                                                     | Shape of the intervention effect pre-specified                                         | Intervention unlikely to affect data collection                                                | Knowledge of the allocated interventions adequately prevented during the study | Incomplete outcome data adequately | Selective outcome reporting                                                       | Other bias                           |              |
| Bennet, 2016       | Very long adoption period with no measurement; possible confounding factors not presented/models not adjusted | Data were classified as pre and post-intervention from the point/date of intervention. | Data were collected from the hospital records databases for pre- and post-intervention periods | Not presented in the paper.                                                    | Medical records used               | All relevant outcomes in the methods section are reported in the results section. | No evidence of other risk of biases. | High         |
| Dykes et al,2020   | Highly likely the changes in outcome to be influenced by confounders.                                         | Point of analysis is the point of intervention.                                        | Sources and methods of data collection were the same before and after the intervention.        | Not presented in the paper.                                                    | Medical records used               | All relevant outcomes are reported in the results section                         | No evidence of other risk of biases. | High         |
| Dowding et al,2012 | Highly likely the changes in outcome to be influenced by confounders.                                         | Point of analysis is the point of intervention.                                        | Sources and methods of data collection were the same before and after the intervention.        | Not presented in paper.                                                        | Medical records used               | All relevant outcomes are reported in the results section.                        | No evidence of other risk of biases. | High         |

Colour codes: Red, high risk; orange, unclear risk; green, low risk

Supplementary Table 3: Summary of patient care process results

| Author & Year                                                    | Interventions     | Health professionals | patient participants                                                      | Outcome measured                                                                                   | Outcome values reported | Change of value within a group <sup>‡</sup> | Risk difference (95% CI) <sup>‡</sup>  |
|------------------------------------------------------------------|-------------------|----------------------|---------------------------------------------------------------------------|----------------------------------------------------------------------------------------------------|-------------------------|---------------------------------------------|----------------------------------------|
| <b>1. Adherence to guidelines</b>                                |                   |                      |                                                                           |                                                                                                    |                         |                                             |                                        |
| Dumont et al, 2012                                               | • CDSS use        | Nurses (OA=44)       | 141 adults                                                                | Deviations from the protocol, out of 10 (mean (SD))                                                | 4 months=0.39(1.0)      | -                                           | Mean difference: -2.61 (-4.5 to -0.71) |
|                                                                  | • Paper protocol  | Nurses               | 159 adults                                                                |                                                                                                    | 4 months=3.0(4.3)       |                                             |                                        |
| Forberg et al, 2016                                              | • CDSS-use        | 108 Nurses           | Not applicable                                                            | Nurses adherence to guidelines on disinfection of hands                                            | Baseline=97/108         | -1.2%                                       | 6.7% (4.9 to 8.5)                      |
|                                                                  | • CDSS non-use    | 103 Nurses           | Not applicable                                                            |                                                                                                    | 3 months=93/105         | -7.9%                                       |                                        |
|                                                                  | • CDSS-use        |                      |                                                                           | Nurses adherence to guidelines on usage of disposable gloves (n/N)                                 | Baseline=96/103         |                                             |                                        |
|                                                                  |                   |                      |                                                                           |                                                                                                    | 3 months=87/102         |                                             |                                        |
|                                                                  |                   |                      |                                                                           |                                                                                                    | Baseline=80/108         | -1.7%                                       | -1.4% (-2.2 to -0.5)                   |
|                                                                  | • CDSS non-use    |                      |                                                                           | Baseline=71/103                                                                                    | -0.3%                   |                                             |                                        |
|                                                                  | • CDSS-use        |                      |                                                                           | 3 months =70/102                                                                                   |                         |                                             |                                        |
|                                                                  | • CDSS-use        |                      |                                                                           | Nurses adherence to guidelines on daily inspection of Peripheral Venous Catheters (PVC) site (n/N) | Baseline=58/108         | 2.6%                                        | -5.2% (-7.1 to -3.3)                   |
|                                                                  | • CDSS non-use    |                      |                                                                           |                                                                                                    | 3 months =58/103        | 7.8%                                        |                                        |
|                                                                  |                   |                      |                                                                           |                                                                                                    | Baseline=47/102         |                                             |                                        |
|                                                                  |                   |                      |                                                                           |                                                                                                    | 3 months =55/102        |                                             |                                        |
| Rood et al, 2005                                                 | • CDSS-based GL   | ICU Nurses           | 66 adults                                                                 | Adherence to Insulin dose Advice (n/N)                                                             | 10 weeks =1818/2352     | -                                           | 22% (19 to 25)                         |
|                                                                  | • Paper-based GL  | ICU Nurses           | 54 adults                                                                 |                                                                                                    | 10 weeks =1667/2597     | -                                           |                                        |
|                                                                  | • CDSS-based GL   | ICU Nurses           | 66 adults                                                                 | Adherence to the guideline for taking blood samples on time (n/N)                                  | 10 weeks =945/2352      | -                                           | 4.7% (2.0 to 7.4)                      |
|                                                                  | • Paper-based GL  | ICU Nurses           | 54 adults                                                                 |                                                                                                    | 10 weeks =922/2597      | -                                           |                                        |
| Vadher et al, 1997                                               | • CDSS            | 1 Nurse              | 87 adults                                                                 | Dose advice 'acceptance' in patients with therapeutic range 2-3                                    | Post-test =188/214      | -                                           | 28% (20.4 to 35.5)                     |
|                                                                  | • Control         | 3 trainee Doctors    | 90 adults                                                                 |                                                                                                    | Post-test=145/242       | -                                           |                                        |
|                                                                  | • CDSS            | 1 Nurse              |                                                                           | Dose advice 'acceptance' in patients with therapeutic range 3-4.5 (n/N)                            | Post-test =160/239      | -                                           | -6.2% (-14.7 to 2.2)                   |
|                                                                  | • Control         | 3 trainee Doctors    |                                                                           |                                                                                                    | Post-test=150/205       |                                             |                                        |
|                                                                  | • CDSS            | 1 Nurse              |                                                                           | Interval advice 'acceptance' (%) in patients with therapeutic range 2-3                            | Post-test =170/230      | -                                           | 23.9% (15.6 to 32.2)                   |
|                                                                  | • Control         | 3 trainee Doctors    |                                                                           |                                                                                                    | Post-test=133/266       |                                             |                                        |
| • CDSS                                                           | 1 Nurse           |                      | Interval advice 'acceptance' (%) in patients with therapeutic range 3-4.5 | Post-test =129/239                                                                                 | -                       | 3.9% (-5.4 to 13.3)                         |                                        |
| • Control                                                        | 3 trainee Doctors |                      |                                                                           | Post-test=101/202                                                                                  |                         |                                             |                                        |
| <b>2. Patient assessment, diagnosis, and treatment practices</b> |                   |                      |                                                                           |                                                                                                    |                         |                                             |                                        |
|                                                                  | • CDSS use period |                      |                                                                           | Pain assessment                                                                                    | Post-test=97.7%         | -                                           | 62.7% (59.6 to 65.8)                   |



|                     |                |               |                |                                                       |                     |   |                                       |
|---------------------|----------------|---------------|----------------|-------------------------------------------------------|---------------------|---|---------------------------------------|
| Bennett et al, 2016 | • CDSS non use |               |                |                                                       | Pre-test=35%        |   |                                       |
|                     | • CDSS use     |               |                | IV antibiotics in 1hr for sepsis                      | Post-test=5.6%      | - | -5.9% (-8.3 to -3.5)                  |
|                     | • CDSS non use |               |                |                                                       | Pre-test=11.5%      |   |                                       |
| Duclos et al, 2015  | • CDSS         | Dieticians    | 667 children   | Investigation of malnutrition aetiology               | Post-test=284/667   | - | 21.2% (15.9 to 26.5)                  |
|                     | • Usual care   | Dieticians    | 477 children   |                                                       | Post-test=102/477   |   |                                       |
|                     | • CDSS         | Dieticians    | 667 children   | Managed by a dietitian                                | Post-test=305/667   | - | 12% (6.3 to 17.7)                     |
|                     | • Usual care   | Dieticians    | 477 children   |                                                       | Post-test=161/477   |   |                                       |
|                     | • CDSS         | Dieticians    | 667 children   | prescribed refeeding protocol                         | Post-test=230/667   | - | -4.5% (-10.2 to 1.2)                  |
|                     | • Usual care   | Dieticians    | 477 children   |                                                       | Post-test=186/477   |   |                                       |
| Geurts et al, 2017  | • CDSS         | Nurses        | 113 children   | Patient consultation time(min)-median (IQR)           | Post-test =136(108) | - | 3 min                                 |
|                     | • Usual care   | Nurses        | 109 children   |                                                       | Post-test =133(92)  |   |                                       |
|                     | • CDSS         | Nurses        | 113 children   | Electrolytes level test                               | Post-test =15/113   | - | -7.8% (-17.7 to 2.1)                  |
|                     | • Usual care   | Nurses        | 109 children   |                                                       | Post-test =23/109   |   |                                       |
|                     | • CDSS         | Nurses        | 113 children   | Acid-base balance test                                | Post-test =13/113   | - | -3.2% (-12.1 to 5.7)                  |
|                     | • Usual care   | Nurses        | 109 children   |                                                       | Post-test =16/109   |   |                                       |
|                     | • CDSS         | Nurses        | 113 children   | Oral Rehydration Solution (nasogastric tube)          | Post-test =17/113   | - | 6.7% (-1.6 to 15.2)                   |
|                     | • Usual care   | Nurses        | 109 children   |                                                       | Post-test =9/109    |   |                                       |
|                     | • CDSS         | Nurses        | 113 children   | IV rehydration given                                  | Post-test =0/113    | - | -1.8% (-4.4 to 0.7)                   |
|                     | • Usual care   | Nurses        | 109 children   |                                                       | Post-test =2/109    |   |                                       |
|                     | • CDSS         | Nurses        | 113 children   | Other liquid given                                    | Post-test =18/113   | - | -11.6% (-22.4 to -0.8)                |
|                     | • Usual care   | Nurses        | 109 children   |                                                       | Post-test =30/109   |   |                                       |
| Roukema et al, 2008 | • CDSS use     | Nurses        | 74 children    | Time spent in ED (minutes), median (IQR)              | 27 months =138 (77) | - | 15 minutes                            |
|                     | • Control      | Nurses        | 90 children    |                                                       | 27 months =123 (96) |   |                                       |
|                     | • CDSS use     | Nurses        | 74 children    | Time spent in ED for lab test (minutes), median (IQR) | 27 months =140 (68) | - | -20 minutes                           |
|                     | • Control      | Nurses        | 90 children    |                                                       | 27 months =160 (98) |   |                                       |
| Snooks et al, 2014  | • CDSS         | 17 Paramedics | 436 adults     | Mean length of episode of care (minutes)              | CDSS Vs control     | - | -5.7 min (-38.5 to 27.2) <sup>†</sup> |
|                     | • Control      | 19 Paramedics | 343 adults     |                                                       |                     |   |                                       |
| Wells, 2013         | • CDSS         | 22 paramedics | 436 adults     | Respiratory rate recorded, %                          | 1 year =405/436     | - | -1.2% (-4.7 to 2.2)                   |
|                     | • Control      | 20 paramedics | 341 adults     |                                                       | 1 year =321/341     |   |                                       |
|                     | • CDSS         | 22 paramedics | 436 adults     | Pulse rate recorded                                   | 1 year =414/436     | - | 0.9% (-3.9 to 2.0)                    |
|                     | • Control      | 20 paramedics | 341 adults     |                                                       | 1 year =327/341     |   |                                       |
|                     | • CDSS         | 22 paramedics | 436 adults     | Consciousness recorded                                | 1 year =405/436     | - | -5.1% (-7.9 to -2.2)                  |
|                     | • Control      | 20 paramedics | 341 adults     |                                                       | 1 year =334/341     |   |                                       |
| Kroth et al, 2006   | • CDSS use     | 164 Nurses    | Not applicable | Proportion of erroneously recorded temperatures       | 9 months =248/45823 | - | -0.8% (-0.9 to -0.6)                  |
|                     | • Control      | 173 Nurses    | Not applicable |                                                       | 9 months =575/44339 |   |                                       |

### 3. Documenting of events

1  
2  
3  
4  
5  
6  
7  
8  
9  
10  
11  
12  
13  
14  
15  
16  
17  
18  
19  
20  
21  
22  
23  
24  
25  
26  
27  
28  
29  
30  
31  
32  
33  
34  
35  
36  
37  
38  
39  
40  
41  
42  
43  
44  
45  
46

|                             |                                                                                      |                                |                          |                                                                  |                                      |   |                                 |
|-----------------------------|--------------------------------------------------------------------------------------|--------------------------------|--------------------------|------------------------------------------------------------------|--------------------------------------|---|---------------------------------|
| Dowding et al, 2012         | <ul style="list-style-type: none"> <li>• CDSS use</li> <li>• CDSS non-use</li> </ul> | Nurses<br>Nurses               |                          | Fall documentation ratio                                         | Post-CDSS use Vs pre-CDSS use period | - | 1.4 (0.03 to 73.7) <sup>†</sup> |
|                             | <ul style="list-style-type: none"> <li>• CDSS use</li> <li>• CDSS non-use</li> </ul> |                                |                          | Hospital acquired pressure ulcer (HAPU) risk documentation ratio | Post-CDSS use Vs pre-CDSS use period | - | 9.1 (1.95 to 42.5) <sup>†</sup> |
| Paulson et al, 2020         | <ul style="list-style-type: none"> <li>• CDSS use</li> <li>• Usual care</li> </ul>   | Nurses<br>Nurses               | 44 adults<br>50 adults   | Documentation of nutritional intake compared to requirements     | 10 months=37/44<br>10 months=2/50    | - | 80% (67 to 92)                  |
|                             | <ul style="list-style-type: none"> <li>• CDSS use</li> <li>• Usual care</li> </ul>   | Nurses<br>Nurses               | 44 adults<br>50 adults   | Documentation of a nutritional care plan                         | 10 months=31/44<br>10 months=8/50    | - | 54.4% (37.6 to 71.3)            |
|                             | <ul style="list-style-type: none"> <li>• CDSS use</li> <li>• Usual care</li> </ul>   | Nurses<br>Nurses               | 44 adults<br>50 adults   | Documentation of nutritional treatment                           | 10 months=36/44<br>10 months=29/50   | - | 23.8% (6 to 41.6)               |
| <b>4. Patient referrals</b> |                                                                                      |                                |                          |                                                                  |                                      |   |                                 |
| Snooks et al, 2014          | <ul style="list-style-type: none"> <li>• CDSS</li> <li>• Control</li> </ul>          | 17 Paramedics<br>19 Paramedics | 436 adults<br>343 adults | Patients referred to falls service                               | 1 year=42/436<br>1 year=17/343       | - | 4.7% (1.1 to 8.3)               |

Note: ‡, calculated from reported information unless stated otherwise; †, as reported by study authors.

Supplementary Table 4: Summary of patient care outcomes results

| Author & Year               | Interventions                                                                                                                                                            | Health professionals | patient participants | Outcome measured                                              | Outcome values reported | Change of value within a group <sup>†</sup> | Risk difference (95% CI) <sup>‡</sup>                                         |
|-----------------------------|--------------------------------------------------------------------------------------------------------------------------------------------------------------------------|----------------------|----------------------|---------------------------------------------------------------|-------------------------|---------------------------------------------|-------------------------------------------------------------------------------|
| <b>1. Glycaemic control</b> |                                                                                                                                                                          |                      |                      |                                                               |                         |                                             |                                                                               |
| Blaha et al, 2009           | <ul style="list-style-type: none"> <li>CDSS (eMPC)</li> <li>Mathias protocol</li> <li>Bath-protocol</li> </ul>                                                           | ICU Nurses           | 40 adults            | Entire study time in target range (blood glucose)- mmol/l     | After 48hrs=46%         | -                                           | Versus Mathias: 7.8% (-13.7 to 29.4)<br>Versus Bath 6.3% (-3.9 to 16.5)       |
|                             |                                                                                                                                                                          |                      | 40 adults            |                                                               | After 48hrs=38.2%       | -                                           |                                                                               |
|                             |                                                                                                                                                                          |                      | 40 adults            |                                                               | After 48hrs=39.7%       | -                                           |                                                                               |
|                             | <ul style="list-style-type: none"> <li>CDSS (eMPC)</li> <li>Mathias protocol</li> <li>Bath-protocol</li> </ul>                                                           | ICU Nurses           | 40 adults            | Entire study mean blood glucose (SE)- mmol/l                  | Baseline=8.1(0.6)       | -2.2 mmol/l                                 | Versus Mathias: -1 mmol/l<br>Versus Bath: -0.7 mmol/l                         |
|                             |                                                                                                                                                                          |                      | 40 adults            |                                                               | 48hrs=5.9(0.2)          | -1.2 mmol/l                                 |                                                                               |
|                             |                                                                                                                                                                          |                      | 40 adults            |                                                               | Baseline=7.9(0.4)       | -1.5 mmol/l                                 |                                                                               |
| Canbolat et al, 2019        | <ul style="list-style-type: none"> <li>CDSS (automated BG control)</li> <li>Standard protocol</li> </ul>                                                                 | Nurses<br>Physicians | 33 adults            | Occasions for BG out of target (120 to 180 mg/dL) range       | 22 months =2101/5789    | -                                           | -21.8% (-23.7 to -20.0)                                                       |
|                             |                                                                                                                                                                          |                      | 33 adults            |                                                               | 22 months =2977/5122    | -                                           |                                                                               |
|                             |                                                                                                                                                                          |                      |                      |                                                               | 22 months =745/5789     | -                                           |                                                                               |
|                             | <ul style="list-style-type: none"> <li>CDSS (automated BG control)</li> <li>Standard protocol</li> </ul>                                                                 |                      |                      | Occasions for BG out of target range due to insulin treatment | 22 months =2099/5122    | -                                           | -28.1% (-29.7 to -26.5)                                                       |
|                             |                                                                                                                                                                          |                      |                      |                                                               |                         |                                             |                                                                               |
|                             |                                                                                                                                                                          |                      |                      |                                                               |                         |                                             |                                                                               |
| Cavalcanti et al, 2009      | <ul style="list-style-type: none"> <li>CDSS (computer-assisted insulin protocol)</li> <li>Control (Leuven protocol)</li> <li>Control (conventional treatment)</li> </ul> | ICU Nurses           | 56 adults            | Mean blood glucose (mmol/dL)                                  | 19 months =125          | -                                           | Versus Leuven -2.1 mmol/dL<br>Versus conventional -33.5 mmol/dL               |
|                             |                                                                                                                                                                          |                      | 58 adults            |                                                               | 19 months =127.1        | -                                           |                                                                               |
|                             |                                                                                                                                                                          |                      | 53 adults            |                                                               | 19 months =158.5        | -                                           |                                                                               |
|                             | <ul style="list-style-type: none"> <li>CDSS (computer-assisted insulin protocol)</li> <li>Control (Leuven protocol)</li> <li>Control (conventional treatment)</li> </ul> | ICU Nurses           | 56 adults            | Patients with hypoglycaemia                                   | 19 months =12/56        | -                                           | Versus Leuven -20% (-36.6 to -3.4)<br>Versus conventional 17.6% (5.7 to 29.5) |
|                             |                                                                                                                                                                          |                      | 58 adults            |                                                               | 19 months =24/58        | -                                           |                                                                               |
|                             |                                                                                                                                                                          |                      | 53 adults            |                                                               | 19 months =2/53         | -                                           |                                                                               |
| Cleveringa et al, 2008      | <ul style="list-style-type: none"> <li>CDSS use in diabetic patients</li> <li>Usual care</li> <li>CDSS use in diabetic patients</li> </ul>                               | Nurses               | 1699 adults          | A1C<7%                                                        | Baseline=60.8%          | 7.2%                                        | 4.6% (2.7 to 6.5)                                                             |
|                             |                                                                                                                                                                          |                      | 1692 adults          |                                                               | 1 year=68%              | 2.6%                                        |                                                                               |
|                             |                                                                                                                                                                          |                      | 1699 adults          |                                                               | Baseline=61.6%          |                                             |                                                                               |
|                             |                                                                                                                                                                          |                      |                      | Systolic BP<140                                               | 1 Year=64.2%            | 12.9%                                       | 10.2% (7.9 to 12.5)                                                           |
|                             |                                                                                                                                                                          |                      |                      |                                                               | Baseline=41%            |                                             |                                                                               |
|                             |                                                                                                                                                                          |                      |                      |                                                               | 1 year=53.9%            |                                             |                                                                               |

1  
2  
3  
4  
5  
6  
7  
8  
9  
10  
11  
12  
13  
14  
15  
16  
17  
18  
19  
20  
21  
22  
23  
24  
25  
26  
27  
28  
29  
30  
31  
32  
33  
34  
35  
36  
37  
38  
39  
40  
41  
42  
43  
44  
45  
46

|                                        |                                 |            |              |                                                                            |                                      |       |                       |
|----------------------------------------|---------------------------------|------------|--------------|----------------------------------------------------------------------------|--------------------------------------|-------|-----------------------|
|                                        | • Usual care                    |            | 1692 adults  |                                                                            | Baseline=39.5%<br>1 year=42.2%       | 2.7%  |                       |
|                                        | • CDSS use in diabetic patients |            | 1699 adults  |                                                                            | Baseline=36.2%<br>1 year=49.0%       | 10.5% | 3.7% (1.2 to 6.2)     |
|                                        | • Usual care                    |            | 1692 adults  | Total cholesterol<br><4.5mmol/l                                            | Baseline=38.5%<br>1 year=45.3%       | 6.8%  |                       |
| Hovorka et al, 2007                    | • CDSS (eMPC)                   | ICU Nurses | 30 adults    | Proportion in target range (4-6.1 mmol/L)                                  | 48 hrs =60.4%                        | -     | 32.9% (20.0 to 46.0)  |
|                                        | • Usual care                    | ICU Nurses | 30 adults    |                                                                            | 48 hrs =27.5%                        |       |                       |
|                                        | • CDSS (eMPC)                   |            |              | Entire study mean blood glucose (mmol/L) (SD)                              | 48 hrs =6.2 (1.1)                    | -     | -1mmol/L              |
|                                        | • Usual care                    |            |              |                                                                            | 48 hrs =7.2 (1.1)                    |       |                       |
|                                        | • CDSS (eMPC)                   |            |              | Time in target range (hours)                                               | 48 hrs =14.5                         |       | 7.9 hrs               |
|                                        | • Usual care                    |            |              |                                                                            | 48 hrs =6.6                          |       |                       |
| Mann et al, 2011                       | • CDSS use                      | ICU Nurses | 18 adults    | Occasions glucose range on target (80 to 110 mg/dl)                        | 72 hrs =47%                          | -     | 6% (-7.7 to 19.7)     |
|                                        | • Paper protocol                | ICU Nurses | 18 adults    |                                                                            | 72 hrs =41%                          |       |                       |
|                                        | • CDSS use                      | ICU Nurses |              | Occasions over target range (over 110 mg/dl)                               | 72 hrs =49%                          | -     | -5% (-18.8 to 8.8)    |
|                                        | • Paper protocol                | ICU Nurses |              |                                                                            | 72 hrs =54%                          |       |                       |
|                                        | • CDSS use                      |            |              | Occasions under target (under 80 mg/dl) range                              | 72 hrs =4.5%                         | -     | -0.3% (-2.1 to 1.5)   |
|                                        | • Paper protocol                |            |              |                                                                            | 72 hrs =4.8%                         |       |                       |
| Plank et al, 2006                      | • CDSS (MPC) use                | ICU Nurses | Not reported | Occasions within the target glycaemic range (80-110 mg/dl)                 | 48 hrs =52%                          | -     | 33% (20.5 to 45.4)    |
|                                        | • Usual care                    | ICU Nurses | Not reported |                                                                            | 48 hrs =19%                          |       |                       |
|                                        | • CDSS (MPC) use                | ICU Nurses | Not reported | Improvement glycaemic control for 48 hours                                 | 48 hrs =65%                          | -     | 40% (27.4 to 52.6)    |
|                                        | • Usual care                    | ICU Nurses | Not reported |                                                                            | 48 hrs =25%                          |       |                       |
|                                        | • CDSS (MPC) use                |            | Not reported | Occasions over the target glycaemic range (>110 mg/dl)                     | 48 hrs =46%                          | -     | -31% (-43.7 to -18.2) |
|                                        | • Usual care                    |            | Not reported |                                                                            | 48 hrs =77%                          |       |                       |
|                                        | • CDSS (MPC) use                |            | Not reported | Average glucose (mg/dl)                                                    | 48 hrs =117mg/dL                     | -     | -14mg/dL              |
|                                        | • Usual care                    |            | Not reported |                                                                            | 48 hrs =131 mg/dL                    |       |                       |
| <b>2. Blood coagulation management</b> |                                 |            |              |                                                                            |                                      |       |                       |
| Fitzmaurice et al, 2000                | • CDSS use                      | Nurses     | 122 adults   | proportion of tests in range                                               | Baseline=223/366<br>1 year =732/1181 | 1.1%  | -1.9% (-3.1 to -0.7)  |
|                                        | • CDSS non-use                  | Physicians | 245 adults   |                                                                            | Baseline=264/480<br>1 year =986/1700 | 3%    |                       |
|                                        | • CDSS use                      | Nurses     |              | International Normalised Ratio (INR) Results Within Range Point Prevalence | Baseline=74/118<br>1 year =86/121    | 8.4%  | -2.6% (-5.3 to -0.1)  |
|                                        | • CDSS non-use                  | Physicians |              |                                                                            | Baseline=129/244                     | 11%   |                       |

|                                                             |                     |                       |              |                                                     |                                    |       |                         |
|-------------------------------------------------------------|---------------------|-----------------------|--------------|-----------------------------------------------------|------------------------------------|-------|-------------------------|
|                                                             |                     |                       |              |                                                     | 1 year =157/245                    |       |                         |
|                                                             | • CDSS use          | Nurses                |              | Time Spent Within INR Target Range                  | Baseline=64/113<br>1 year =76/110  | 12%   | 7% (-0.7 to 14.7)       |
|                                                             | • CDSS non-use      | Physicians            |              |                                                     | Baseline=99/174<br>1 year= 143/230 | 5%    |                         |
| <b>3. Antenatal and peripartum care</b>                     |                     |                       |              |                                                     |                                    |       |                         |
| Dalaba et al, 2015                                          | • CDSS use          | Nurses                | Not reported | Antenatal complications per 1000 attendance         | Before=9<br>After =12              | 0.3%  | 0.3% (-0.03 to 0.6)     |
|                                                             | • CDSS non-use      | Nurses                | Not reported |                                                     | Before =16<br>After =16            | 0%    |                         |
|                                                             | • CDSS use          |                       |              | Delivery complications per 1000 attendances         | Before=107<br>After=96             | -0.9% | 2.4% (1.1 to 3.7)       |
|                                                             | • CDSS non-use      |                       |              |                                                     | Before=133<br>After=100            | -3.3% |                         |
| <b>4. Managing patients with chronic co-morbid diseases</b> |                     |                       |              |                                                     |                                    |       |                         |
| McDonald et al, 2017                                        | • CDSS use          | 165 Nurses            | 2550 adults  | Medication regimen complexity index <24.5           | Post-test=158/2550                 | -     | 0% (-1.1 to 1.1)        |
|                                                             | • Usual care        | 335 Nurses            | 5369 adults  |                                                     | Post-test =333/5369                |       |                         |
|                                                             | • CDSS use          | 165 Nurses            | 2550 adults  | Emergency room use                                  | Post-test =421/2550                | -     | -0.2 (-1.9 to 1.6)      |
|                                                             | • Usual care        | 335 Nurses            | 5369 adults  |                                                     | Post-test =897/5369                |       |                         |
|                                                             | • CDSS use          | 165 Nurses            | 2550 adults  | Hospitalisation                                     | Post-test =502/2550                | -     | -1.4% (-3.3 to 0.5)     |
|                                                             | • Usual care        | 335 Nurses            | 5369 adults  |                                                     | Post-test =1133/5369               |       |                         |
| Lv et al, 2019                                              | • CDSS use          | Nurses                | 70 children  | Number of asthma exacerbations per patient (median) | 1 year=3                           | -     | -1                      |
|                                                             | • Usual care        | Nurses                | 73 children  |                                                     | 1 year=4                           | -     |                         |
| <b>5. Outpatient obesity screening</b>                      |                     |                       |              |                                                     |                                    |       |                         |
| Lee et al, 2009                                             | • CDSS use          | 13 Nurses             | 807 adults   | Encounters with obesity related diagnosis           | 8 months =91/807                   | -     | 10.3% (8.0 to 12.5)     |
|                                                             | • Usual care        | 16 Nurses             | 997 adults   |                                                     | 8 months =10/997                   |       |                         |
|                                                             | • CDSS use          | 13 Nurses             | 807 adults   | Encounters with missed obesity-related diagnosis    | 8 months =51/208                   | -     | -41.9% (-48.8 to -35.1) |
|                                                             | • Usual care        | 16 Nurses             | 997 adults   |                                                     | 8 months =440/662                  |       |                         |
| <b>6. Fall and pressure ulcer management</b>                |                     |                       |              |                                                     |                                    |       |                         |
| Beeckman et al, 2013                                        | • CDSS(Pre-vPlan)   | 65 Nurses and physios | 225 adults   | Pressure ulcer prevention                           | Day1=15/58<br>Day120=41/65         | 37.2% | 2.3% (-11.0 to 15.6)    |
|                                                             | • Standard protocol | 53 Nurses and physios | 239 adults   |                                                     | Day1=16/63<br>Day120=41/68         | 34.9% |                         |
|                                                             | • CDSS(Pre-vPlan)   | 65 Nurses and physios | 225 adults   |                                                     | Day 1=34/225<br>Day120=16/225      | -8%   | -6.3% (-10.2 to -2.4)   |

|                      |                     |                       |                |                                              |                                      |       |                                     |
|----------------------|---------------------|-----------------------|----------------|----------------------------------------------|--------------------------------------|-------|-------------------------------------|
|                      | • Standard protocol | 53 Nurses and physios | 239 adults     | Prevalence of pressure ulcer                 | Day1=39/239<br>Day120=35/239         | -1.7% |                                     |
| Byrne,2005           | • CDSS use          | 89 Nurses             | Not reported   | Fall rate                                    | Before=0.312<br>After=0.318          | 0.6%  | 3.1%                                |
|                      | • CDSS non-use      |                       | Not reported   |                                              | before=0.315<br>After=0.29           | -2.5% |                                     |
|                      | • CDSS use          |                       | Not reported   | Pressure ulcer rate                          | Before=0.085<br>After=0.088          | -0.3% | -0.6%                               |
|                      | • CDSS non-use      |                       | Not reported   |                                              | Before=0.091<br>After=0.094          | 0.3%  |                                     |
| Dowding et al,2012   | • CDSS use          |                       |                | Fall rate                                    | Post-CDSS use Vs pre-CDSS use period | -     | 0.91 (0.75 to 1.12) <sup>†</sup>    |
|                      | • CDSS non-use      |                       |                |                                              |                                      |       |                                     |
|                      | • CDSS use          |                       |                | HAPU ratio                                   | Post-CDSS use Vs pre-CDSS use period | -     | 0.47 (0.25 to 0.85) <sup>†</sup>    |
|                      | • CDSS non-use      |                       |                |                                              |                                      |       |                                     |
| Dykes et al, 2009    | • CDSS use          | Nurses                | 5160 adults    | Fall rate difference (per 1000 patient days) | CDSS use Vs usual care               | -     | -1.16 (-2.16 to -0.17) <sup>†</sup> |
|                      | • Usual care        | Nurses                | 5104 adults    |                                              |                                      |       |                                     |
| Dykes et al, 2020    | • UDSS use          | Nurses                | 19,283 adults  | Fall rate difference (per 1000 patient days) | Post-CDSS use Vs pre-CDSS use period | -     | -0.15 (-0.04 to -0.25) <sup>†</sup> |
|                      | • CDSS non-use      | Nurses                | 17,948 adults  |                                              |                                      |       |                                     |
| Fossum et al,2011    | • CDSS use          | Nurses                | 367 adults     | Prevalence of pressure Ulcers                | Before=16/167<br>After=23/200        | 1.9%  | 4.2% (0.2 to 8.2)                   |
|                      | • CDSS non-use      | Nurses                | 274 adults     |                                              | Before=17/150<br>After=11/122        | -2.3% |                                     |
|                      | • CDSS use          |                       |                | Prevalence of malnutrition                   | Before=45/161<br>After=39/199        | -8.3% | -12.4% (-19.1 to -5.7)              |
|                      | • CDSS non-use      |                       |                |                                              | Before=31/148<br>After=30/120        | 4.1%  |                                     |
| <b>7. Triage</b>     |                     |                       |                |                                              |                                      |       |                                     |
| Bennett et al, 2016  | • CDSS use period   | Nurses                | 400 adults     | Correct triage prioritisation                | Post-test=85.2%<br>Pre-test=60.5%    | -     | 24.7% (18.8 to 30.6)                |
|                      | • CDSS non-use      | Nurses                | 400 adults     |                                              |                                      |       |                                     |
| Lattimer et al, 1998 | • CDSS              | Nurses                | Not applicable | Calls managed with telephone advice from GP  | Post-test =1109/7184                 | -     | -34.2% (-35.6 to -32.8)             |
|                      | • Usual care        | Physicians            | Not applicable |                                              | Post-test =3629/7308                 |       |                                     |
|                      | • CDSS              | Nurses                |                | Patient attended primary care centre         | Post-test =1177/7184                 | -     | -10% (-11.4 to -8.8)                |
|                      | • Usual care        | Physicians            |                |                                              | Post-test =1934/7308                 |       |                                     |
|                      | • CDSS              | Nurses                |                | Patient visited at home by duty GP           | Post-test =1317/7184                 | -     | -5.5% (-6.9 to -4.2)                |
|                      | • Usual care        | Physicians            |                |                                              | Post-test =1745/7308                 |       |                                     |
| Lattimer et al, 2000 | • CDSS              | Nurses                |                | Total admissions within 3 days               | 1 year =428/7184                     | -     | -0.98% (-1.8 to -0.2)               |
|                      | • Usual care        | Physicians            |                |                                              | 1 year =507/7308                     |       |                                     |
|                      | • CDSS              | Paramedics            | 436 adults     |                                              | 1 year =183/436                      | -     | 5.2% (-1.7 to 12.1)                 |

|                                                      |                            |                          |                          |                                                                         |                                          |   |                                     |
|------------------------------------------------------|----------------------------|--------------------------|--------------------------|-------------------------------------------------------------------------|------------------------------------------|---|-------------------------------------|
| Snooks et al, 2014                                   | • Control                  | Paramedics               | 343 adults               | Patients left at scene without conveyance to emergency department       | 1 year =126/343                          |   |                                     |
|                                                      | • CDSS                     |                          | 436 adults               | Patients with further emergency admission to hospital or death          | 1 year=69/436                            | - | 1.5% (-3.5 to 6.6)                  |
|                                                      | • Control                  |                          | 343 adults               | Patients with ED attendance or emergency admission to hospital or death | 1 year =49/343                           |   |                                     |
|                                                      | • CDSS                     |                          |                          |                                                                         | 1 year =92/436                           | - | 3.3% (-2.3 to 8.9)                  |
|                                                      | • Control                  |                          |                          |                                                                         | 1 year =61/343                           |   |                                     |
|                                                      | • CDSS                     |                          |                          | Patients who reported >1 further fall                                   | 1 year =135/236                          | - | -6.8% (-16.3 to 2.7)                |
|                                                      | • Control                  |                          |                          |                                                                         | 1 year =112/175                          |   |                                     |
| <b>8. Quality of life and patients' satisfaction</b> |                            |                          |                          |                                                                         |                                          |   |                                     |
| Cleveringa et al, 2010                               | • CDSS use<br>• Usual care |                          |                          | Life-years gained                                                       | CDSS Vs usual care                       | - | 0.14 (-0.12 to 0.40) <sup>†</sup>   |
|                                                      | • CDSS use<br>• Usual care |                          |                          | Healthy years (QALYs, discounted)                                       | CDSS Vs usual care                       | - | 0.037 (-0.066 to 0.14) <sup>†</sup> |
| Snooks et al, 2014                                   | • CDSS<br>• Control        | Paramedics<br>Paramedics | 239 adults<br>177 adults | Quality of Life (SF12 MCS), mean (SD)                                   | 1 year =41.9(10.3)<br>1 year =42.9(10.9) | - | -1 (-3.1 to 1.1)                    |
|                                                      | • CDSS<br>• Control        | Paramedics<br>Paramedics | 239 adults<br>177 adults | Quality of Life (SF12 PCS), mean (SD)                                   | 1 year=29(8)<br>1 year=30(8.5)           | - | -1 (-2.6 to 0.6)                    |
|                                                      | • CDSS<br>• Control        | Paramedics<br>Paramedics | 228 adults<br>165 adults | Patient satisfaction (QC Technical), mean (SD)                          | 1 year =97.8(10.7)<br>1 year=98.2(9.4)   | - | -0.4 (-2.4 to 1.6)                  |

Note: ‡, calculated from reported information unless stated otherwise; †, as reported by study authors.

Supplementary Table 5: Summary of Health professionals' knowledge, beliefs and behaviour results

| Author & Year        | Interventions                  | Health professionals  | patient participants | Outcome measured                                                                   | Outcome values reported                     | Change of value within a group <sup>†</sup> | Mean or risk difference (95% CI) <sup>‡</sup> |
|----------------------|--------------------------------|-----------------------|----------------------|------------------------------------------------------------------------------------|---------------------------------------------|---------------------------------------------|-----------------------------------------------|
| Beeckman et al, 2013 | • CDSS(Pre-vPlan)              | 65 Nurses and physios | 225 adults           | Positive knowledge change                                                          | Baseline=28/65<br>5 months=26/50            | 8.9%                                        | 6.5% (0.8 to 13.2)                            |
|                      | • Standard protocol            | 53 Nurses and physios | 239 adults           |                                                                                    | Baseline=21/53<br>5 months=16/38            | 2.4%                                        |                                               |
|                      | • CDSS(Pre-vPlan)              | 65 Nurses and physios | 225 adults           | Positive attitude change                                                           | Baseline=48/65<br>5 months=42/50            | 10.2%                                       | 12.7% (5.9 to 19.5)                           |
|                      | • Standard protocol            | 53 Nurses and physios | 239 adults           |                                                                                    | Baseline=39/53<br>5 months=27/38            | -2.5%                                       |                                               |
| Cortez, 2014         | • CDSS (drop-down boxes)       | 26 Nurses             | NA                   | Research utilisation                                                               | Baseline=35%<br>11 weeks=38%                | 3%                                          | 9% (3.3 to 14.7)                              |
|                      | • Control                      | 24 Nurses             | NA                   |                                                                                    | Baseline=19%<br>11 weeks=13%                | -6%                                         |                                               |
| Dumont et al,2012    | • CDSS use                     | Nurses (OA=44)        | 141 adults           | Nurses satisfaction, out of 10 (mean (SD))                                         | 4 months=8.4(1.4)                           | -                                           | 3.6 (2.4 to 4.8)                              |
|                      | • Paper protocol               | Nurses                | 159 adults           | perception of how often needed to deviate from the protocol, out of 10 (mean (SD)) | 4 months=4.8(2.4)                           |                                             |                                               |
|                      | • CDSS use<br>• Paper protocol |                       |                      |                                                                                    | 4 months=2.7(2.2)<br>4 months=7.4(2.4)      | -                                           | -4.7 (-6.1 to -3.3)                           |
| Sassen et al,2014    | • CDSS use                     | 42 nurses and physios | Not reported         | Behaviour, mean (SD)                                                               | Baseline=4.5 (1.02)<br>17 months=4.6 (0.85) | 0.1 (0.93)                                  | 0.1 (-0.32 to 0.53)                           |
|                      | • Control                      | 27 nurses and physios | Not reported         |                                                                                    | baseline=4.8 (0.69)<br>17 months=4.8 (0.82) | 0 (0.75)                                    |                                               |
|                      | • CDSS use                     | 42 nurses and physios |                      | Intention, mean (SD)                                                               | Baseline=6.3 (1.0)<br>17 months=6.1 (1.1)   | 0.2 (1.05)                                  | 0.3 (-0.22 to 0.82)                           |
|                      | • Control                      | 27 nurses and physios |                      |                                                                                    | Baseline=5.9 (1.15)<br>17 months=6.0 (0.91) | -0.1(1.05)                                  |                                               |
|                      | • CDSS use                     | 42 nurses and physios |                      | Attitude, mean (SD)                                                                | Baseline=6.3 (0.44)<br>17 months=6.3 (0.56) | 0.0(0.05)                                   | -0.1 (-0.13 to -0.07)                         |
|                      | • Control                      | 27 nurses and physios |                      |                                                                                    | Baseline=6.2 (0.69)<br>17 months=6.3 (0.68) | 0.1 (0.09)                                  |                                               |
|                      | • CDSS use                     | 42 nurses and physios |                      | Perceived behavioural control, mean (SD)                                           | Baseline=4.7 (0.79)<br>17 months=5.0 (0.73) | 0.3 (0.77)                                  | -0.1 (-0.49 to 0.29)                          |



|            |                       |                                |                                             |             |                     |
|------------|-----------------------|--------------------------------|---------------------------------------------|-------------|---------------------|
| • Control  | 27 nurses and physios |                                | Baseline=4.9 (0.87)<br>17 months=5.3 (0.8)  | 0.4 (0.85)  |                     |
| • CDSS use | 42 nurses and physios | Subjective norms,<br>mean (SD) | Baseline=5.5 (0.55)<br>17 months=5.6 (0.63) | 0.1 (0.59)  | 0 (0.34 to 0.34)    |
| • Control  | 27 nurses and physios |                                | Baseline=5.6 (0.93)<br>17 months=5.7 (0.76) | 0.1 (0.84)  |                     |
| • CDSS use | 42 nurses and physios | Moral norms, mean<br>(SD)      | Baseline=6.0 (0.63)<br>17 months=6.2 (0.7)  | 0.2 (0.67)  | 0.1 (-0.21 to 0.41) |
| • Control  | 27 nurses and physios |                                | Baseline=6.2 (0.59)<br>17 months=6.3 (0.55) | 0.1 (0.57)  |                     |
| • CDSS use | 42 nurses and physios | Barriers, mean (SD)            | Baseline=3.1 (1.17)<br>17 months=3.2 (1.12) | 0.1 (1.14)  | 0.3 (-0.23 to 0.83) |
| • Control  | 27 nurses and physios |                                | Baseline=2.8 (1.01)<br>17 months=2.6 (0.96) | -0.2 (0.98) |                     |

Note: ‡, calculated from reported information unless stated otherwise; †, as reported by study authors.

Supplementary Table 6: Summary of adverse events results

| Author & Year          | Interventions                   | Health professionals | patient participants | Outcome measured                | Outcome values reported | Risk difference (95% CI) <sup>‡</sup> |
|------------------------|---------------------------------|----------------------|----------------------|---------------------------------|-------------------------|---------------------------------------|
| Cleveringa et al,2010  | • CDSS use in diabetic patients | Nurses               | 1699 adults          | cardiovascular events occurring | CDSS Vs usual care      | -11% (-18 to -4) <sup>‡</sup>         |
|                        | • Usual care                    | Nurses               | 1692 adults          |                                 |                         |                                       |
| Fitzmaurice et al,2000 | • CDSS Nurse                    | Nurses               | 224 adults           | Serious adverse reaction events | 1 year =3 (1.3%)        | -5.7% (-10.1 to -1.2)                 |
|                        | • CDSS non-use                  | Physicians           | 143 adults           |                                 | 1 year =10 (7%)         |                                       |
|                        | • CDSS Nurse                    | Nurses               | 224 adults           | Deaths                          | 1 year =3 (1.3%)        |                                       |
|                        | • CDSS non-use                  | Physicians           | 143 adults           |                                 | 1 year =9 (6.3%)        |                                       |
| Snooks et al, 2014     | CDSS<br>Control                 | 17 Paramedics        | 436 adults           | Patients dying                  | 1 year =19/436 (4.4%)   | 1.2% (-1.5 to 3.8)                    |
|                        |                                 | 19 Paramedics        | 343 adults           |                                 | 1 year=11/343 (3.2%)    |                                       |

Note: ‡, calculated from reported information unless stated otherwise; †, as reported by study authors.

Supplementary Table 7: Summary of economic costs and consequences results

| Author & Year          | Interventions        | Health professionals | patient participants | Outcome measured                                        | Outcome values reported                         | Difference (95% CI) <sup>†</sup>      |                                          |
|------------------------|----------------------|----------------------|----------------------|---------------------------------------------------------|-------------------------------------------------|---------------------------------------|------------------------------------------|
| Cleveringa et al, 2010 | • CDSS use           | Nurses               |                      | Diabetes-related costs (excluding CHD)-€ discounted     | CDSS Vs usual care                              | 1,698.00 (187 to 3,209) <sup>†</sup>  |                                          |
|                        | • Usual care         | Nurses               |                      |                                                         |                                                 |                                       |                                          |
|                        | • CDSS use           |                      |                      | Cardiovascular disease cost-€ discounted                | CDSS Vs usual care                              | -587.00 (-880 to -294) <sup>†</sup>   |                                          |
|                        | • Usual care         |                      |                      |                                                         |                                                 |                                       |                                          |
|                        | • CDSS use           |                      |                      | Diabetic care protocol cost-€ discounted                | CDSS Vs usual care                              | 316.00 (315 to 318) <sup>†</sup>      |                                          |
|                        | • Usual care         |                      |                      |                                                         |                                                 |                                       |                                          |
|                        | • CDSS use           |                      |                      | Total cost-€ discounted                                 | CDSS Vs usual care                              | 1,415.00 (-130 to 2,961) <sup>†</sup> |                                          |
|                        | • Usual care         |                      |                      |                                                         |                                                 |                                       |                                          |
|                        | • CDSS use           |                      |                      | Total costs per QALY gained (Euro)                      | CDSS Vs usual care                              | 38,243.00 <sup>†</sup>                |                                          |
|                        | • Usual care         |                      |                      |                                                         |                                                 |                                       |                                          |
|                        | Guerts et al, 2017   | • CDSS use           | Nurses               | 113 children                                            | Average emergency department visit costs (Euro) | 156.4                                 | 0.00                                     |
|                        |                      | • Usual care         | Nurses               | 109 children                                            |                                                 | 156.4                                 |                                          |
| • CDSS use             |                      |                      |                      | Average diagnostics cost (Euro)                         | 1.09                                            | -0.46                                 |                                          |
| • Usual care           |                      |                      |                      |                                                         | 1.55                                            |                                       |                                          |
| • CDSS use             |                      |                      |                      | Average treatment cost (Euro)                           | 4.48                                            | 1.90                                  |                                          |
| • Usual care           |                      |                      |                      |                                                         | 2.58                                            |                                       |                                          |
| • CDSS use             |                      |                      |                      | Average follow-up/hospitalization (Euro)                | 134.                                            | 26.60                                 |                                          |
| • Usual care           |                      |                      |                      |                                                         | 107.4                                           |                                       |                                          |
| • CDSS use             |                      |                      |                      | Average costs of missed diagnoses/adverse events (Euro) | 49.70                                           | -32.10                                |                                          |
| • Usual care           |                      |                      |                      |                                                         | 81.8                                            |                                       |                                          |
|                        | • CDSS use           |                      |                      | Average cost of CDSS implementation (Euro)              | 61.95                                           | 61.95                                 |                                          |
|                        | • Usual care         |                      |                      |                                                         | 0.0                                             |                                       |                                          |
|                        | • CDSS use           |                      |                      | Overall average cost                                    | 408                                             | 58.00                                 |                                          |
|                        | • Usual care         |                      |                      |                                                         | 350                                             |                                       |                                          |
|                        | Lattimer et al, 2000 | • CDSS               | Nurses               | Not applicable                                          | Net savings [of CDSS use] in a year (£)         | CDSS Vs usual care                    | 13,185 (-77,509 to 123,824) <sup>†</sup> |
|                        |                      | • Usual care         | Physicians           | Not applicable                                          |                                                 |                                       |                                          |
|                        | • CDSS               |                      |                      | Cost saved from inpatient stay                          | CDSS Vs usual care                              | 51,059 <sup>†</sup>                   |                                          |
|                        | • Usual care         |                      |                      |                                                         |                                                 |                                       |                                          |
| Snooks et al, 2014     | • CDSS               | Paramedics           |                      | Implementing cost of CCDS in one month (in 100s £)      | 74                                              | 74                                    |                                          |
|                        | • Control            | Paramedics           |                      |                                                         |                                                 |                                       |                                          |
|                        | • CDSS               |                      |                      | Total cost of implementation in one month (in 100s £)   | 2,773                                           | 247 (-247 to 741) <sup>†</sup>        |                                          |
|                        | • Control            |                      |                      |                                                         | 2,526                                           |                                       |                                          |
|                        | • CDSS               |                      |                      | Net resources saved                                     |                                                 | 39 <sup>†</sup>                       |                                          |

|           |                                  |                 |                                       |
|-----------|----------------------------------|-----------------|---------------------------------------|
| • Control | by CDSS per patient year (£)     |                 |                                       |
| • CDSS    | Net cost resources saved by CCDS |                 | 208-308 <sup>†</sup>                  |
| • Control | per patient year (£)             |                 |                                       |
| • CDSS    | Mean length of Job cycle time    | CDSS Vs control | 8.9 min (2.3 to 15.3) <sup>†</sup>    |
| • Control | (minutes)                        |                 |                                       |
| • CDSS    | Mean length of episode of care   | CDSS Vs control | -5.7 min (-38.5 to 27.2) <sup>†</sup> |
| • Control | (minutes)                        |                 |                                       |

Note: ‡, calculated from reported information unless stated otherwise; †, as reported by study authors; PCS, physical component summary; MCS, mental component summary; SF, Short-Form

For peer review only

1  
2  
3  
4  
5  
6  
7  
8  
9  
10  
11  
12  
13  
14  
15  
16  
17  
18  
19  
20  
21  
22  
23  
24  
25  
26  
27  
28  
29  
30  
31  
32  
33  
34  
35  
36  
37  
38  
39  
40  
41  
42  
43  
44  
45  
46



# PRISMA 2009 Checklist

1  
2  
3  
4  
5  
6  
7  
8  
9  
10  
11  
12  
13  
14  
15  
16  
17  
18  
19  
20  
21  
22  
23  
24  
25  
26  
27  
28  
29  
30  
31  
32  
33  
34  
35  
36  
37  
38  
39  
40  
41  
42  
43  
44  
45  
46  
47

| Section/topic                      | #  | Checklist item                                                                                                                                                                                                                                                                                              | Reported on page # |
|------------------------------------|----|-------------------------------------------------------------------------------------------------------------------------------------------------------------------------------------------------------------------------------------------------------------------------------------------------------------|--------------------|
| <b>TITLE</b>                       |    |                                                                                                                                                                                                                                                                                                             |                    |
| Title                              | 1  | Identify the report as a systematic review, meta-analysis, or both.                                                                                                                                                                                                                                         | 1                  |
| <b>ABSTRACT</b>                    |    |                                                                                                                                                                                                                                                                                                             |                    |
| Structured summary                 | 2  | Provide a structured summary including, as applicable: background; objectives; data sources; study eligibility criteria, participants, and interventions; study appraisal and synthesis methods; results; limitations; conclusions and implications of key findings; systematic review registration number. | 2                  |
| <b>INTRODUCTION</b>                |    |                                                                                                                                                                                                                                                                                                             |                    |
| Rationale                          | 3  | Describe the rationale for the review in the context of what is already known.                                                                                                                                                                                                                              | 3                  |
| Objectives                         | 4  | Provide an explicit statement of questions being addressed with reference to participants, interventions, comparisons, outcomes, and study design (PICOS).                                                                                                                                                  | 3                  |
| <b>METHODS</b>                     |    |                                                                                                                                                                                                                                                                                                             |                    |
| Protocol and registration          | 5  | Indicate if a review protocol exists, if and where it can be accessed (e.g., Web address), and, if available, provide registration information including registration number.                                                                                                                               | 3                  |
| Eligibility criteria               | 6  | Specify study characteristics (e.g., PICOS, length of follow-up) and report characteristics (e.g., years considered, language, publication status) used as criteria for eligibility, giving rationale.                                                                                                      | 3-4                |
| Information sources                | 7  | Describe all information sources (e.g., databases with dates of coverage, contact with study authors to identify additional studies) in the search and date last searched.                                                                                                                                  | 3-4                |
| Search                             | 8  | Present full electronic search strategy for at least one database, including any limits used, such that it could be repeated.                                                                                                                                                                               | 3-4                |
| Study selection                    | 9  | State the process for selecting studies (i.e., screening, eligibility, included in systematic review, and, if applicable, included in the meta-analysis).                                                                                                                                                   | 4                  |
| Data collection process            | 10 | Describe method of data extraction from reports (e.g., piloted forms, independently, in duplicate) and any processes for obtaining and confirming data from investigators.                                                                                                                                  |                    |
| Data items                         | 11 | List and define all variables for which data were sought (e.g., PICOS, funding sources) and any assumptions and simplifications made.                                                                                                                                                                       | 4,17               |
| Risk of bias in individual studies | 12 | Describe methods used for assessing risk of bias of individual studies (including specification of whether this was done at the study or outcome level), and how this information is to be used in any data synthesis.                                                                                      | 4                  |
| Summary measures                   | 13 | State the principal summary measures (e.g., risk ratio, difference in means).                                                                                                                                                                                                                               | 5                  |
| Synthesis of results               | 14 | Describe the methods of handling data and combining results of studies, if done, including measures of consistency (e.g., I <sup>2</sup> ) for each meta-analysis.                                                                                                                                          | 5                  |



# PRISMA 2009 Checklist

Page 1 of 2

| Section/topic                 | #  | Checklist item                                                                                                                                                                                           | Reported on page # |
|-------------------------------|----|----------------------------------------------------------------------------------------------------------------------------------------------------------------------------------------------------------|--------------------|
| Risk of bias across studies   | 15 | Specify any assessment of risk of bias that may affect the cumulative evidence (e.g., publication bias, selective reporting within studies).                                                             | NA                 |
| Additional analyses           | 16 | Describe methods of additional analyses (e.g., sensitivity or subgroup analyses, meta-regression), if done, indicating which were pre-specified.                                                         | NA                 |
| <b>RESULTS</b>                |    |                                                                                                                                                                                                          |                    |
| Study selection               | 17 | Give numbers of studies screened, assessed for eligibility, and included in the review, with reasons for exclusions at each stage, ideally with a flow diagram.                                          | 5-6                |
| Study characteristics         | 18 | For each study, present characteristics for which data were extracted (e.g., study size, PICOS, follow-up period) and provide the citations.                                                             | 8-10               |
| Risk of bias within studies   | 19 | Present data on risk of bias of each study and, if available, any outcome level assessment (see item 12).                                                                                                | NA                 |
| Results of individual studies | 20 | For all outcomes considered (benefits or harms), present, for each study: (a) simple summary data for each intervention group (b) effect estimates and confidence intervals, ideally with a forest plot. | 11-14              |
| Synthesis of results          | 21 | Present results of each meta-analysis done, including confidence intervals and measures of consistency.                                                                                                  | NA                 |
| Risk of bias across studies   | 22 | Present results of any assessment of risk of bias across studies (see Item 15).                                                                                                                          | NA                 |
| Additional analysis           | 23 | Give results of additional analyses, if done (e.g., sensitivity or subgroup analyses, meta-regression [see Item 16]).                                                                                    | NA                 |
| <b>DISCUSSION</b>             |    |                                                                                                                                                                                                          |                    |
| Summary of evidence           | 24 | Summarize the main findings including the strength of evidence for each main outcome; consider their relevance to key groups (e.g., healthcare providers, users, and policy makers).                     | 14-17              |
| Limitations                   | 25 | Discuss limitations at study and outcome level (e.g., risk of bias), and at review-level (e.g., incomplete retrieval of identified research, reporting bias).                                            | 17                 |
| Conclusions                   | 26 | Provide a general interpretation of the results in the context of other evidence, and implications for future research.                                                                                  | 17                 |
| <b>FUNDING</b>                |    |                                                                                                                                                                                                          |                    |
| Funding                       | 27 | Describe sources of funding for the systematic review and other support (e.g., supply of data); role of funders for the systematic review.                                                               | 17                 |

From: Moher D, Liberati A, Tetzlaff J, Altman DG, The PRISMA Group (2009). Preferred Reporting Items for Systematic Reviews and Meta-Analyses: The PRISMA Statement. PLoS Med 6(7): e1000097. doi:10.1371/journal.pmed1000097

For more information, visit: [www.prisma-statement.org](http://www.prisma-statement.org).

Page 2 of 2

For peer review only - <http://bmjopen.bmj.com/site/about/guidelines.xhtml>
