# Supplementary material for: Effects of computerised clinical decision support systems (CDSS) on nursing and allied health professional performance and patient outcomes: a systematic review of experimental and observational studies
Source: PubMed Central journal article supplement (PMC8679061; doi:10.1136/bmjopen-2021-053886), 2021-12-15
Supplement: bmjopen-2021-053886supp001.pdf [file bmjopen-2021-053886supp001.pdf]

**SUPPLEMENTARY MATERIAL LIST**

**Supplementary Table 1:** Search strategies, to February 12, 2021

**Supplementary Table 2:** Risk of Bias assessment justifications using Effective Practice Organisation of Care (EPOC)'s tool

**Supplementary Table 3:** Summary of patient care process results

**Supplementary Table 4** Summary of patient care outcomes results

**Supplementary Table 5:** Summary of Health professionals' knowledge, beliefs and behaviour results

**Supplementary Table 6:** Summary of adverse events results

**Supplementary Table 7:** Summary of economic costs and consequences results

**Supplementary Table 1: Search strategies****1. Ovid MEDLINE(R) ALL, 1946 to February 12, 2021 Search Strategy**

-----

1 exp Decision Making/ (207895)  
2 decision support techniques/ (20911)  
3 (decision\* adj2 making).ti,ab,kf. (159754)  
4 (decision\* adj2 support\*).ti,ab,kf. (24230)  
5 (decision\* adj2 aid\*).ti,ab,kf. (6501)  
6 or/1-5 (354546)  
7 exp Computers/ (79322)  
8 exp information systems/ (238259)  
9 exp Informatics/ (537355)  
10 Internet/ (74916)  
11 Software/ (112580)  
12 Cell Phone/ (8821)  
13 Mobile Applications/ (6962)  
14 exp Telemedicine/ (32559)  
15 Medical Records Systems, Computerized/ (19076)  
16 exp Electronic Health Records/ (21793)  
17 computer\*.ti,ab,kf. (313610)  
18 electronic\*.ti,ab,kf. (291368)  
19 (internet or web or online or on-line).ti,ab,kf. (310071)  
20 (software or computer program\*).ti,ab,kf. (193359)  
21 (automate\* or automation).ti,ab,kf. (136436)  
22 (pda or pdas).ti,ab,kf. (13229)  
23 personal digital assistant\*.ti,ab,kf. (1012)  
24 (app or apps).ti,ab,kf. (31717)  
25 (application\* adj2 mobile\*).ti,ab,kf. (4834)  
26 (iPad\* or iPhone\* or smartphone\* or smart phone\* or smart device\*  
or mobile phone or android phone\* or cellphone\* or cell  
phone\*).ti,ab,kf. (26450)  
27 (tablet adj2 (pc or device\* or comput\*)).ti,ab,kf. (1603)

- 28 ((hand held or handheld) adj2 (pc or device\* or comput\*)).ti,ab,kf.  
(2669)
- 29 (telehealth or telecare or telemedicine or ehealth or  
mhealth).ti,ab,kf. (29130)
- 30 or/7-29 (1674343)
- 31 6 and 30 (66042)
- 32 exp Decision Making, Computer-Assisted/ (149528)
- 33 Decision Support Systems, Clinical/ (8302)
- 34 (computer assisted adj2 (decision\* or diagnos\* or therap\* or  
support or treatment? or management)).ti,ab,kf. (1545)
- 35 (computer aided adj2 (decision\* or diagnos\* or therap\* or support  
or treatment? or management)).ti,ab,kf. (3921)
- 36 (decision adj2 support adj2 (system\* or tool\*)).ti,ab,kf. (9917)
- 37 (decision making adj2 (system\* or tool\*)).ti,ab,kf. (2560)
- 38 Expert Systems/ (3420)
- 39 (expert adj2 system\*).ti,ab,kf. (3613)
- 40 Reminder Systems/ (3568)
- 41 ((computer\* or electronic\* or CDSS) adj2 (reminder\* or  
alert\*)).ti,ab,kf. (1210)
- 42 ((medication or medicine or treatment or therapy) adj2 (reminder\*  
or alert\*)).ti,ab,kf. (857)
- 43 reminder system\*.ti,ab,kf. (875)
- 44 Medical Order Entry Systems/ (2303)
- 45 ((computer\* or electronic\*) adj2 order entry).ti,ab,kf. (1874)
- 46 (computer adj2 decision support\*).ti,ab. (412)
- 47 CPOE.ti,ab,kf. (1139)
- 48 or/32-47 (177952)
- 49 31 or 48 [all computerised clinical decision support systems terms]  
(228840)
- 50 Allied Health Personnel/ (11925)
- 51 Allied Health Occupations/ (587)
- 52 Physical Therapist Assistants/ (16)
- 53 Physical Therapy Specialty/ (2889)
- 54 Speech-Language Pathology/ (3172)

- 55 Occupational Therapy/ (13482)
- 56 Nutritionists/ (1290)
- 57 dietetics/ (7837)
- 58 Anesthesiologists/ (1163)
- 59 podiatry/ (2273)
- 60 exp Osteopaths/ (321)
- 61 osteopathic physicians/ (321)
- 62 anesthesiologist\*.ti,ab,kf. (22810)
- 63 podiatrist\*.ti,ab,kf. (910)
- 64 prosthetist\*.ti,ab,kf. (397)
- 65 chiropodist\*.ti,ab,kf. (132)
- 66 orthoptist\*.ti,ab,kf. (319)
- 67 orthotist\*.ti,ab,kf. (220)
- 68 osteopath\*.ti,ab,kf. (5983)
- 69 radiographer\*.ti,ab,kf. (1803)
- 70 art therapist\*.ti,ab,kf. (89)
- 71 drama therapist\*.ti,ab,kf. (3)
- 72 music therapist\*.ti,ab,kf. (368)
- 73 (allied adj2 health adj2 (profession\* or worker\* or personnel or occupation\* or staff)).ti,ab,kf. (3421)
- 74 ((physical or occupational or language or speech or physio\*) adj2 therap\*).ti,ab,kf. (50227)
- 75 physiotherapist\*.ti,ab,kf. (8544)
- 76 dietetic\*.ti,ab,kf. (9828)
- 77 dietitian\*.ti,ab,kf. (6580)
- 78 nutritionist\*.ti,ab,kf. (3020)
- 79 Patient care team/ (66483)
- 80 ((multidisciplinary or multi-disciplinary or multiprofessional or multi-professional or interdisciplinary or interprofessional) adj2 team\*).ti,ab,kf. (32126)
- 81 Emergency Medical Technicians/ (5756)
- 82 Emergency Medical Services/ (43736)
- 83 Ambulances/ (6210)

- 84 Air Ambulances/ (2874)  
85 paramedic\*.ti,ab,kf. (8537)  
86 HEMS.ti,ab,kf. (767)  
87 ems.ti,ab,kf. (13017)  
88 emt.ti,ab,kf. (25232)  
89 prehospita1.ti,ab,kf. (13136)  
90 pre-hospita1.ti,ab,kf. (4836)  
91 first responder\*.ti,ab,kf. (2449)  
92 emergency medical technician\*.ti,ab,kf. (1168)  
93 emergency services.ti,ab,kf. (4115)  
94 ambulance\*.ti,ab,kf. (11269)  
95 field triage.ti,ab,kf. (275)  
96 out-of-hospita1.ti,ab,kf. (11317)  
97 (nurse or nurses or nursing).ti,ab,kf. (462330)  
98 exp nurses/ (89638)  
99 exp nursing staff/ (67063)  
100 Midwifery/ (19460)  
101 (midwif\* or midwiv\*).ti,ab,kf. (25895)  
102 or/50-101 [allied health professionals or nurses or midwives]  
(836031)  
103 49 and 102 [all CDSS and allied health professionals or nurses or  
midwives] (9549)

## 2. Embase Classic+Embase 1947 to February 12, 2021 Search Strategy

- 1 exp Decision Making/ (399525)  
2 decision support techniques/ (20092)  
3 (decision\* adj2 making).ti,ab,kw. (218454)  
4 (decision\* adj2 support\*).ti,ab,kw. (32940)  
5 (decision\* adj2 aid\*).ti,ab,kw. (9487)  
6 or/1-5 (504731)  
7 exp Computer/ (159861)

8 exp information system/ (166084)  
9 exp information science/ (113984)  
10 Internet/ (112888)  
11 Software/ (79162)  
12 mobile phone/ (17899)  
13 smartphone/ (15041)  
14 Mobile Application/ (13261)  
15 exp Telemedicine/ (47236)  
16 electronic medical record system/ (1535)  
17 exp Electronic Health Record/ (21723)  
18 computer\*.ti,ab,kw. (407323)  
19 electronic\*.ti,ab,kw. (350647)  
20 (internet or web or online or on-line).ti,ab,kw. (418206)  
21 (software or computer program\*).ti,ab,kw. (321717)  
22 (automate\* or automation).ti,ab,kw. (197239)  
23 (pda or pdas).ti,ab,kw. (18450)  
24 personal digital assistant\*.ti,ab,kw. (1217)  
25 (app or apps).ti,ab,kw. (43764)  
26 (application\* adj2 mobile\*).ti,ab,kw. (6399)  
27 (iPad\* or iPhone\* or smartphone\* or smart phone\* or smart device\*  
or android phone\* or cellphone\* or cell phone\* or mobile phone\*).ti,ab,kw.  
(38430)  
28 (tablet adj2 (pc or device\* or comput\*)).ti,ab,kw. (2528)  
29 ((hand held or handheld) adj2 (pc or device\* or comput\*)).ti,ab,kw.  
(3833)  
30 (telehealth or telecare or telemedicine or ehealth or  
mhealth).ti,ab,kw. (35247)  
31 or/7-30 (1897765)  
32 6 and 31 (80108)  
33 exp decision support system/ (27016)  
34 clinical decision support system/ (3594)  
35 (computer assisted adj2 (decision\* or diagnos\* or therap\* or  
support or treatment? or management)).ti,ab,kw. (2316)

- 36 (computer aided adj2 (decision\* or diagnos\* or therap\* or support or treatment? or management)).ti,ab,kw. (5577)
- 37 (decision adj2 support adj2 (system\* or tool\*)).ti,ab,kw. (13211)
- 38 (decision making adj2 (system\* or tool\*)).ti,ab,kw. (3662)
- 39 Expert System/ (5507)
- 40 (expert adj2 system\*).ti,ab,kw. (5205)
- 41 Reminder System/ (2730)
- 42 ((computer\* or electronic\* or CDSS) adj2 (reminder\* or alert\*)).ti,ab,kw. (1848)
- 43 ((medication or medicine or treatment or therapy) adj2 (reminder\* or alert\*)).ti,ab. (1362)
- 44 reminder system\*.ti,ab,kw. (1189)
- 45 physician order entry system/ (284)
- 46 ((computer\* or electronic\*) adj2 order entry).ti,ab,kw. (2801)
- 47 CPOE.ti,ab,kw. (1715)
- 48 (computer\* adj2 decision support\*).ti,ab,kw. (1907)
- 49 or/33-48 (56905)
- 50 32 or 49 [All computerised clinical decision support systems terms] (106747)
- 51 Occupation/ (52894)
- 52 physiotherapist assistant/ (83)
- 53 physiotherapist/ (23150)
- 54 speech disorder/ (27422)
- 55 Occupational Therapy/ (25731)
- 56 dietitian/ (13219)
- 57 Anesthesiologist/ (7231)
- 58 osteopathic physician/ (356)
- 59 radiographer/ (634)
- 60 podiatrist/ (831)
- 61 anesthesiologist\*.ti,ab,kw. (34979)
- 62 podiatrist\*.ti,ab,kw. (1315)
- 63 prosthetist\*.ti,ab,kw. (635)
- 64 chiropodist\*.ti,ab,kw. (179)

- 65 orthoptist\*.ti,ab,kw. (620)
- 66 orthotist\*.ti,ab,kw. (419)
- 67 osteopath\*.ti,ab,kw. (8365)
- 68 radiographer\*.ti,ab,kw. (4001)
- 69 art therapist\*.ti,ab,kw. (266)
- 70 drama therapist\*.ti,ab,kw. (20)
- 71 music therapist\*.ti,ab,kw. (607)
- 72 (allied adj2 health adj2 (profession\* or worker\* or personnel or occupation\* or staff)).ti,ab,kw. (5338)
- 73 ((physical or physio\* or occupational or language or speech) adj2 therap\*).ti,ab,kw. (77705)
- 74 physiotherapist\*.ti,ab,kw. (18271)
- 75 dietetic\*.ti,ab,kw. (14409)
- 76 dietitian\*.ti,ab,kw. (10785)
- 77 nutritionist\*.ti,ab,kw. (5156)
- 78 Patient care/ (310700)
- 79 multi-disciplinary team/ (10246)
- 80 collaborative care team/ (903)
- 81 ((multidisciplinary or multi-disciplinary or multiprofessional or multi-professional or interdisciplinary or interprofessional) adj2 team\*).ti,ab,kw. (57679)
- 82 rescue personnel/ (8059)
- 83 emergency health service/ (105109)
- 84 ambulance/ (14751)
- 85 air medical transport/ (2965)
- 86 paramedical personnel/ (14896)
- 87 paramedic\*.ti,ab,kw. (13029)
- 88 HEMS.ti,ab,kw. (1067)
- 89 ems.ti,ab,kw. (19120)
- 90 emt.ti,ab,kw. (36500)
- 91 prehospital.ti,ab,kw. (18282)
- 92 pre-hospital.ti,ab,kw. (8656)
- 93 first responder\*.ti,ab,kw. (3260)



- 94 emergency medical technician\*.ti,ab,kw. (1553)  
95 emergency services.ti,ab,kw. (6114)  
96 ambulance\*.ti,ab,kw. (17409)  
97 field triage.ti,ab,kw. (382)  
98 out-of-hospital.ti,ab,kw. (19034)  
99 (nurse or nurses or nursing).ti,ab,kw. (554357)  
100 exp nurse/ (194823)  
101 nursing staff/ (73869)  
102 midwife/ (28233)  
103 (midwif\* or midwiv\*).ti,ab. (29459)  
104 or/51-103 [allied health professionals or nurses or midwives]  
(1389786)  
105 50 and 104 [all CDSS and allied health professionals or nurses or  
midwives] (16820)

### **3. PsycINFO 1806 to February 12,2021 Search Strategy:**

---

- 1 exp Decision Making/ (124412)  
2 Decision Support Systems/ (3377)  
3 (decision\* adj2 making).ti,ab. (93578)  
4 (decision\* adj2 support\*).ti,ab. (5773)  
5 (decision\* adj2 aid\*).ti,ab. (1934)  
6 or/1-5 (168090)  
7 exp Computers/ (43893)  
8 exp information systems/ (48548)  
9 exp information/ (44565)  
10 Internet/ (29404)  
11 computer software/ (10412)  
12 mobile Phones/ (4735)  
13 smartphones/ (1843)  
14 mobile applications/ (1082)  
15 Mobile devices/ (2634)  
16 exp Telemedicine/ (9383)

- 17 Health Information Technology/ (304)
- 18 Electronic Health Records/ (880)
- 19 computer\*.ti,ab. (91287)
- 20 electronic\*.ti,ab. (33377)
- 21 (internet or web or online or on-line).ti,ab. (145714)
- 22 (software or computer program\*).ti,ab. (31224)
- 23 (automate\* or automation).ti,ab. (14470)
- 24 (pda or pdas).ti,ab. (937)
- 25 personal digital assistant\*.ti,ab. (440)
- 26 (app or apps).ti,ab. (7624)
- 27 (application\* adj2 mobile\*).ti,ab. (1392)
- 28 (iPad\* or iPhone\* or mobile phone or smartphone\* or smart phone\* or smart device\* or android phone\* or cellphone\* or cell phone\*).ti,ab. (10036)
- 29 (tablet adj2 (pc or device\* or comput\*)).ti,ab. (680)
- 30 ((hand held or handheld) adj2 (pc or device\* or comput\*)).ti,ab. (813)
- 31 (telehealth or telecare or telemedicine or ehealth or mhealth).ti,ab. (4475)
- 32 or/7-31 (362180)
- 33 6 and 32 (21605)
- 34 Decision Support Systems/ (3377)
- 35 Computer Assisted Diagnosis/ (1589)
- 36 (computer assisted adj2 (decision\* or diagnos\* or therap\* or support or treatment? or management)).ti,ab. (273)
- 37 (computer aided adj2 (decision\* or diagnos\* or therap\* or support or treatment? or management)).ti,ab. (179)
- 38 (decision adj2 support adj2 (system\* or tool\*)).ti,ab. (2189)
- 39 (decision making adj2 (system\* or tool\*)).ti,ab. (1022)
- 40 Expert Systems/ (5732)
- 41 (expert adj2 system\*).ti,ab. (1376)
- 42 ((medication or medicine or treatment or therapy) adj2 (reminder\* or alert\*)).ti,ab. (202)
- 43 reminder system\*.ti,ab. (125)

- 44 ((computer\* or electronic\*) adj2 order entry).ti,ab. (94)
- 45 (computer\* adj2 decision support\*).ti,ab. (183)
- 46 CPOE.ti,ab. (46)
- 47 or/33-46 [CDSS terms] (30902)
- 48 Allied Health Personnel/ (1109)
- 49 Physical Therapists/ (536)
- 50 Physical Therapy/ (2987)
- 51 Speech therapists/ (1229)
- 52 Speech Language Pathology/ (1088)
- 53 Occupational Therapists/ (2346)
- 54 anesthesiologist\*.ti,ab. (457)
- 55 podiatrist\*.ti,ab. (47)
- 56 prosthetist\*.ti,ab. (23)
- 57 orthoptist\*.ti,ab. (17)
- 58 [chiropracist\*.ti,kw.] (0)
- 59 [orthotist\*.ti,kw.] (0)
- 60 [osteopath\*.ti,kw.] (0)
- 61 radiographer\*.ti,ab. (81)
- 62 art therapist\*.ti,ab. (1375)
- 63 drama therapist\*.ti,ab. (75)
- 64 music therapist\*.ti,ab. (1337)
- 65 (allied adj2 health adj2 (profession\* or worker\* or personnel or occupation\* or staff)).ti,ab. (1123)
- 66 ((physical or physio\* or occupational or language or speech) adj2 therap\*).ti,ab. (18118)
- 67 physiotherapist\*.ti,ab. (1346)
- 68 dietetic\*.ti,ab. (610)
- 69 dietitian\*.ti,ab. (756)
- 70 nutritionist\*.ti,ab. (417)
- 71 Interdisciplinary Treatment Approach/ (7399)
- 72 ((multidisciplinary or multi-disciplinary or multiprofessional or multi-professional or interdisciplinary or interprofessional) adj2 team\*).ti,ab. (8106)

- 73 emergency services/ (8779)  
74 emergency personnel/ (117)  
75 paramedics/ (337)  
76 HEMS.ti,ab. (27)  
77 ems.ti,ab. (1010)  
78 emt.ti,ab. (230)  
79 prehospital.ti,ab. (387)  
80 pre-hospital.ti,ab. (262)  
81 first responders/ (307)  
82 emergency medical technician\*.ti,ab. (154)  
83 emergency services.ti,ab. (1211)  
84 ambulance\*.ti,ab. (860)  
85 field triage.ti,ab. (6)  
86 out-of-hospital.ti,ab. (355)  
87 exp nurses/ (32673)  
88 nursing/ (23241)  
89 (nurse or nurses or nursing).ti,ab. (97190)  
90 midwifery/ (1436)  
91 (midwif\* or midwiv\*).ti,ab. (3137)  
92 or/48-91 [allied health professionals or nurses or midwives]  
(148809)  
93 47 and 92 [all CDSS and allied health professionals or nurses or  
midwives] (1171)

#### 4. Database: HMIC Health Management Information Consortium 1983 – February 12, 2021

##### Search Strategy:

---

- 1 exp Decision Making/ (5606)  
2 (decision\* adj2 making).ti,ab. (6795)  
3 (decision\* adj2 support\*).ti,ab. (871)  
4 (decision\* adj2 aid\*).ti,ab. (276)  
5 or/1-4 (10211)  
6 exp Computers/ (2133)  
7 exp information systems/ (4916)

8 exp medical Informatics/ (67)  
9 Internet/ (1342)  
10 Software/ (0)  
11 telephone/ (110)  
12 Telemedicine/ (1328)  
13 computerised medical records systems.ti,ab. (0)  
14 Medical Records/ (1946)  
15 computer\*.ti,ab. (6305)  
16 electronic\*.ti,ab. (4484)  
17 (internet or web or online or on-line).ti,ab. (5066)  
18 (software or computer program\*).ti,ab. (1593)  
19 (automate\* or automation).ti,ab. (605)  
20 (pda or pdas).ti,ab. (56)  
21 personal digital assistant\*.ti,ab. (32)  
22 (app or apps).ti,ab. (130)  
23 (application\* adj2 mobile\*).ti,ab. (32)  
24 (iPad\* or iPhone\* or smartphone\* or smart phone\* or smart device\*  
or android phone\* or cellphone\* or cell phone\*).ti,ab. (146)  
25 (tablet adj2 (pc or device\* or comput\*)).ti,ab. (16)  
26 ((hand held or handheld) adj2 (pc or device\* or comput\*)).ti,ab.  
(61)  
27 (telehealth or telecare or telemedicine or mhealth or  
ehealth).ti,ab. (1453)  
28 or/6-27 (22729)  
29 5 and 28 (1239)  
30 (computer assisted adj2 (decision\* or diagnos\* or therap\* or  
support or treatment? or management)).ti,ab. (25)  
31 (computer aided adj2 (decision\* or diagnos\* or therap\* or support  
or treatment? or management)).ti,ab. (17)  
32 (decision adj2 support adj2 (system\* or tool\*)).ti,ab. (347)  
33 (decision making adj2 (system\* or tool\*)).ti,ab. (107)  
34 Expert Systems/ (107)  
35 (expert adj2 system\*).ti,ab. (131)

- 36 ((computer\* or electronic\* or CDSS) adj2 (reminder\* or alert\*)).ti,ab. (48)
- 37 reminder system\*.ti,ab. (44)
- 38 ((computer\* or electronic\* or CDSS) adj2 (reminder\* or alert\*)).ti,ab. (48)
- 39 ((computer\* or electronic\*) adj2 order entry).ti,ab. (58)
- 40 (computer\* adj2 decision support\*).ti,ab. (114)
- 41 CPOE.ti,ab. (26)
- 42 or/29-41 [all CDSS terms] (1714)
- 43 Allied Health Personnel/ (0)
- 44 Physical Therapy Speciality/ (0)
- 45 Physiotherapists/ (350)
- 46 Speech-Language Pathology/ (0)
- 47 Occupational Therapists/ (542)
- 48 podiatrists/ (59)
- 49 anesthesiologist\*.ti,ab. (11)
- 50 podiatrist\*.ti,ab. (37)
- 51 prosthetist\*.ti,ab. (19)
- 52 chiropodist\*.ti,ab. (76)
- 53 orthoptist\*.ti,ab. (23)
- 54 orthotist\*.ti,ab. (15)
- 55 osteopath\*.ti,ab. (93)
- 56 radiographer\*.ti,ab. (178)
- 57 art therapist\*.ti,ab. (5)
- 58 drama therapist\*.ti,ab. (2)
- 59 music therapist\*.ti,tw. (15)
- 60 (allied adj2 health adj2 (profession\* or worker\* or personnel or occupation\* or staff)).ti,ab. (368)
- 61 ((physical or physio\* or occupational or language or speech) adj2 therap\*).ti,ab. (2010)
- 62 physiotherapist\*.ti,ab. (671)
- 63 dietetic\*.ti,ab. (187)
- 64 dietitian\*.ti,ab. (130)

- 65 nutritionist\*.ti,ab. (28)
- 66 Patient care team/ (139)
- 67 ((multidisciplinary or multi-disciplinary or multiprofessional or multi-professional or interdisciplinary or interprofessional) adj2 team\*).ti,ab. (1676)
- 68 exp emergency medical services/ (0)
- 69 paramedic\*.ti,ab. (395)
- 70 HEMS.ti,ab. (11)
- 71 ems.ti,ab. (51)
- 72 emt.ti,ab. (3)
- 73 prehospital.ti,ab. (58)
- 74 pre-hospital.ti,ab. (137)
- 75 first responder\*.ti,ab. (28)
- 76 emergency medical technician\*.ti,ab. (8)
- 77 emergency services.ti,ab. (514)
- 78 ambulance\*.ti,ab. (1710)
- 79 field triage.ti,ab. (1)
- 80 out-of-hospital.tw. (292)
- 81 nurses/ (12920)
- 82 nursing staff/ (12920)
- 83 (nurse or nurses or nursing).ti,ab. (39541)
- 84 midwifery/ (665)
- 85 (midwif\* or midwiv\*).ti,ab. (4553)
- 86 or/43-85 [allied health professionals or nurses or midwives] (50288)
- 87 42 and 86 [all CDSS terms and allied health professionals or nurses or midwives] (291)

##### **5. AMED (Allied and Complementary Medicine) 1985 to October 2019 Search Strategy:**

---

- 1 exp Decision Making/ (4522)
- 2 (decision\* adj2 making).ti,ab. (2826)
- 3 (decision\* adj2 support\*).ti,ab. (217)

- 4 (decision\* adj2 aid\*).ti,ab. (92)
- 5 or/1-4 (6218)
- 6 exp Computers/ (1765)
- 7 exp information systems/ (150)
- 8 exp medical Informatics/ (775)
- 9 Internet/ (1242)
- 10 Software/ (450)
- 11 telephone/ (377)
- 12 Telemedicine/ (985)
- 13 computerised medical records systems.ti,ab. (0)
- 14 Medical Records/ (383)
- 15 computer\*.ti,ab. (4200)
- 16 electronic\*.ti,ab. (2339)
- 17 (internet or web or online or on-line).ti,ab. (6503)
- 18 (software or computer program\*).ti,ab. (1436)
- 19 (automate\* or automation).ti,ab. (399)
- 20 (pda or pdas).ti,ab. (77)
- 21 personal digital assistant\*.ti,ab. (26)
- 22 (app or apps).ti,ab. (175)
- 23 (application\* adj2 mobile\*).ti,ab. (39)
- 24 (iPad\* or iPhone\* or smartphone\* or smart phone\* or smart device\*  
or android phone\* or cellphone\* or cell phone\*).ti,ab. (225)
- 25 (tablet adj2 (pc or device\* or comput\*)).ti,ab. (29)
- 26 ((hand held or handheld) adj2 (pc or device\* or comput\*)).ti,ab.  
(40)
- 27 (telehealth or telecare or telemedicine or mhealth or  
ehealth).ti,ab. (555)
- 28 or/6-27 (16500)
- 29 5 and 28 (443)
- 30 (computer assisted adj2 (decision\* or diagnos\* or therap\* or  
support or treatment? or management)).ti,ab. (18)
- 31 (computer aided adj2 (decision\* or diagnos\* or therap\* or support  
or treatment? or management)).ti,ab. (13)
- 32 (decision adj2 support adj2 (system\* or tool\*)).ti,ab. (41)



- 33 (decision making adj2 (system\* or tool\*)).ti,ab. (62)
- 34 Expert Systems/ (12)
- 35 (expert adj2 system\*).ti,ab. (46)
- 36 ((computer\* or electronic\* or CDSS) adj2 (reminder\* or alert\*)).ti,ab. (7)
- 37 reminder system\*.ti,ab. (3)
- 38 ((computer\* or electronic\* or CDSS) adj2 (reminder\* or alert\*)).ti,ab. (7)
- 39 ((computer\* or electronic\*) adj2 order entry).ti,ab. (0)
- 40 (computer\* adj2 decision support\*).ti,ab. (8)
- 41 CPOE.ti,ab. (0)
- 42 or/29-41 [all CDSS terms] (593)
- 43 Allied Health Personnel/ (659)
- 44 Physical Therapy Speciality/ (2201)
- 45 Physiotherapists/ (1476)
- 46 Speech-Language Pathology/ (237)
- 47 Occupational Therapists/ (1076)
- 48 podiatrists/ (36)
- 49 anesthesiologist\*.ti,ab. (64)
- 50 podiatrist\*.ti,ab. (172)
- 51 prosthetist\*.ti,ab. (84)
- 52 chiropodist\*.ti,ab. (32)
- 53 orthoptist\*.ti,ab. (1)
- 54 orthotist\*.ti,ab. (63)
- 55 osteopath\*.ti,ab. (1733)
- 56 radiographer\*.ti,ab. (18)
- 57 art therapist\*.ti,ab. (179)
- 58 drama therapist\*.ti,ab. (10)
- 59 music therapist\*.ti,tw. (115)
- 60 (allied adj2 health adj2 (profession\* or worker\* or personnel or occupation\* or staff)).ti,ab. (285)
- 61 ((physical or physio\* or occupational or language or speech) adj2 therap\*).ti,ab. (14459)

- 62 physiotherapist\*.ti,ab. (2897)
- 63 dietetic\*.ti,ab. (133)
- 64 dietitian\*.ti,ab. (74)
- 65 nutritionist\*.ti,ab. (39)
- 66 Patient care team/ (1786)
- 67 ((multidisciplinary or multi-disciplinary or multiprofessional or multi-professional or interdisciplinary or interprofessional) adj2 team\*).ti,ab. (1129)
- 68 exp emergency medical services/ (420)
- 69 paramedic\*.ti,ab. (78)
- 70 HEMS.ti,ab. (1)
- 71 ems.ti,ab. (96)
- 72 emt.ti,ab. (65)
- 73 prehospital.ti,ab. (32)
- 74 pre-hospital.ti,ab. (13)
- 75 first responder\*.ti,ab. (9)
- 76 emergency medical technician\*.ti,ab. (8)
- 77 emergency services.ti,ab. (24)
- 78 ambulance\*.ti,ab. (45)
- 79 field triage.ti,ab. (0)
- 80 out-of-hospital.tw. (10429)
- 81 nurses/ (1071)
- 82 nursing staff/ (213)
- 83 (nurse or nurses or nursing).ti,ab. (9441)
- 84 midwifery/ (120)
- 85 (midwif\* or midwiv\*).ti,ab. (239)
- 86 or/43-85 [allied health professionals or nurses or midwives] (41793)
- 87 42 and 86 [all CDSS terms and allied health professionals or nurses or midwives] (186)

## 6. CINAHL EBSCO Search Strategy

---

| #    | Query*                                                                                                                                                                                                                                                                                                                                                                          | Results |
|------|---------------------------------------------------------------------------------------------------------------------------------------------------------------------------------------------------------------------------------------------------------------------------------------------------------------------------------------------------------------------------------|---------|
| S101 | S46 AND S100                                                                                                                                                                                                                                                                                                                                                                    | 11,824  |
| S100 | S47 OR S48 OR S49 OR S50 OR S51 OR S52 OR S53 OR S54 OR S55 OR S56 OR S57 OR S58 OR S59 OR S60 OR S61 OR S62 OR S63 OR S64 OR S65 OR S66 OR S67 OR S68 OR S69 OR S70 OR S71 OR S72 OR S73 OR S74 OR S75 OR S76 OR S77 OR S78 OR S79 OR S80 OR S81 OR S82 OR S83 OR S84 OR S85 OR S86 OR S87 OR S88 OR S89 OR S90 OR S91 OR S92 OR S93 OR S94 OR S95 OR S96 OR S97 OR S98 OR S99 | 867,856 |
| S99  | TI ( (midwif* or midwiv*) ) OR AB ( (midwif* or midwiv*) )                                                                                                                                                                                                                                                                                                                      | 35,031  |
| S98  | (MH "Midwives+")                                                                                                                                                                                                                                                                                                                                                                | 15,748  |
| S97  | (MH "Midwifery+")                                                                                                                                                                                                                                                                                                                                                               | 20,976  |
| S96  | TI ( ( (nurse or nurses or nursing) ) OR ( (nurse or nurses or nursing) ) ) OR AB ( ( (nurse or nurses or nursing) ) OR ( (nurse or nurses or nursing) ) )                                                                                                                                                                                                                      | 535,366 |
| S95  | (MH "Nursing Staff, Hospital") "                                                                                                                                                                                                                                                                                                                                                | 20,953  |
| S94  | (MH "Nurses+")                                                                                                                                                                                                                                                                                                                                                                  | 228,583 |
| S93  | TI "music therapist*" OR AB "music therapist"                                                                                                                                                                                                                                                                                                                                   | 592     |
| S92  | TI "drama therapist*" OR AB "drama therapist"                                                                                                                                                                                                                                                                                                                                   | 6       |
| S91  | TI "art therapist*" OR AB "art therapist"                                                                                                                                                                                                                                                                                                                                       | 420     |
| S90  | TI radiographer* OR AB radiographer*                                                                                                                                                                                                                                                                                                                                            | 2,300   |
| S89  | TI osteopath* OR AB osteopath*                                                                                                                                                                                                                                                                                                                                                  | 3,074   |
| S88  | TI orthotist* OR AB orthotist*                                                                                                                                                                                                                                                                                                                                                  | 188     |
| S87  | TI orthoptist* OR AB orthoptist*                                                                                                                                                                                                                                                                                                                                                | 34      |
| S86  | TI chiropodist* OR AB chiropodist*                                                                                                                                                                                                                                                                                                                                              | 458     |
| S85  | TI prosthetist* OR AB prosthetist*                                                                                                                                                                                                                                                                                                                                              | 335     |
| S84  | TI podiatrist* OR AB podiatrist*                                                                                                                                                                                                                                                                                                                                                | 2,440   |
| S83  | TI anesthesiologist* OR AB anesthesiologist*                                                                                                                                                                                                                                                                                                                                    | 6,441   |
| S82  | (MH "Radiologic Technologists")                                                                                                                                                                                                                                                                                                                                                 | 5,733   |
| S81  | (MH "Osteopaths")                                                                                                                                                                                                                                                                                                                                                               | 682     |
| S80  | (MH "Podiatrists")                                                                                                                                                                                                                                                                                                                                                              | 2,444   |
| S79  | MH "Anesthesiologists")                                                                                                                                                                                                                                                                                                                                                         | 1,495   |

|     |                                                                                                                                                                                                                                                                                                 |        |
|-----|-------------------------------------------------------------------------------------------------------------------------------------------------------------------------------------------------------------------------------------------------------------------------------------------------|--------|
| S78 | TI "out-of-hospital" OR AB "out-of-hospital"                                                                                                                                                                                                                                                    | 6,634  |
| S77 | TI "field triage" OR AB "field triage"                                                                                                                                                                                                                                                          | 173    |
| S76 | TI ambulance* OR AB ambulance*                                                                                                                                                                                                                                                                  | 6,499  |
| S75 | TI "emergency services" OR AB "emergency services"                                                                                                                                                                                                                                              | 1,921  |
| S74 | TI "emergency medical technician*" OR AB "emergency medical technician*"                                                                                                                                                                                                                        | 725    |
| S73 | "first responder*" OR AB "first responder*"                                                                                                                                                                                                                                                     | 1,402  |
| S72 | TI pre-hospital OR AB pre-hospital                                                                                                                                                                                                                                                              | 2,500  |
| S71 | TI prehospita OR AB prehospita                                                                                                                                                                                                                                                                  | 7,480  |
| S70 | TI emt OR AB emt                                                                                                                                                                                                                                                                                | 2,753  |
| S69 | TI EMS OR AB EMS                                                                                                                                                                                                                                                                                | 9,336  |
| S68 | TI HEMS OR AB HEMS                                                                                                                                                                                                                                                                              | 1,348  |
| S67 | TI paramedic* OR AB paramedic*                                                                                                                                                                                                                                                                  | 5,903  |
| S66 | (MH "Ambulances")                                                                                                                                                                                                                                                                               | 4,565  |
| S65 | (MH "Emergency Medical Services")                                                                                                                                                                                                                                                               | 26,747 |
| S64 | (MH "Emergency Medical Technicians")                                                                                                                                                                                                                                                            | 12,426 |
| S63 | TI ( ((multidisciplinary or multi-disciplinary or multiprofessional or "multi-professional" or interdisciplinary or interprofessional) ) OR AB ( (multidisciplinary or "multi-disciplinary" or multiprofessional or "multi-professional" or interdisciplinary or interprofessional) N2 team*) ) | 33,294 |
| S62 | (MH "Multidisciplinary Care Team")                                                                                                                                                                                                                                                              | 45,878 |
| S61 | TI nutritionist* OR AB nutritionist*                                                                                                                                                                                                                                                            | 1,676  |
| S60 | TI dietitian* OR AB dietitian*                                                                                                                                                                                                                                                                  | 5,004  |
| S59 | TI physiotherapist* OR AB physiotherapist*                                                                                                                                                                                                                                                      | 8,379  |
| S58 | TI ( ((physical or occupational or language or speech) N1 therapist*) ) AND AB ( ((physical or occupational or language or speech) N1 therapist*) )                                                                                                                                             | 2,999  |
| S57 | TI ( (allied N2 health N2 (profession* or worker* or personnel or occupation* or staff)) ) OR AB ( (allied N2 health N2 (profession* or worker* or personnel or occupation* or staff)) )                                                                                                        | 2,748  |
| S56 | (MH "Dietetics")                                                                                                                                                                                                                                                                                | 2,356  |

|     |                                                                                                                                                                                                                                                                                                                  |        |
|-----|------------------------------------------------------------------------------------------------------------------------------------------------------------------------------------------------------------------------------------------------------------------------------------------------------------------|--------|
| S55 | (MH "Nutrition Services")                                                                                                                                                                                                                                                                                        | 1,054  |
| S54 | (MH "Occupational Therapy")                                                                                                                                                                                                                                                                                      | 23,116 |
| S53 | (MH "Speech-Language Pathology")                                                                                                                                                                                                                                                                                 | 6,105  |
| S52 | (MH "Physical Therapists")                                                                                                                                                                                                                                                                                       | 12,660 |
| S51 | (MH "Physical Therapy")                                                                                                                                                                                                                                                                                          | 35,365 |
| S50 | (MH "Physical Therapist Assistants")                                                                                                                                                                                                                                                                             | 814    |
| S49 | TI "music therapist*" OR AB "music therapist"                                                                                                                                                                                                                                                                    | 592    |
| S48 | TI "Physical Therapist Assistant*" or AB "Physical Therapist Assistant"                                                                                                                                                                                                                                          | 276    |
| S47 | (MH "Allied Health Personnel")                                                                                                                                                                                                                                                                                   | 4,326  |
| S46 | S31 or S32 or S33 or S34 or S35 or S36 or S37 or S38 or S39 or S40 or S41 or S42 or S43 or S44 or S45 or S46                                                                                                                                                                                                     | 94,625 |
| S45 | TI ( ((computer* or electronic*) N2 order entry) ) OR AB ( ((computer* or electronic*) N2 order entry) ) or TI ((CPOE or computer* N2 decision*)) or AB ((CPOE or computer* N2 decision*))                                                                                                                       | 2,368  |
| S44 | (MH "Electronic Order Entry")                                                                                                                                                                                                                                                                                    | 3,355  |
| S43 | TI "reminder system*" OR AB "reminder system"                                                                                                                                                                                                                                                                    | 390    |
| S42 | TI ( ((computer* or electronic* or CDSS) N2 (reminder* or alert*)) ) OR AB ( ((computer* or electronic* or CDSS) N2 (reminder* or alert*)) ) or TI ((medication or medicine or treatment or therapy) N2 (reminder* or alert*)) or AB ((medication or medicine or treatment or therapy) N2 (reminder* or alert*)) | 1,691  |
| S41 | (MH "Reminder Systems")                                                                                                                                                                                                                                                                                          | 2,949  |
| S40 | TI (expert N2 system*) OR AB (expert N2 system*)                                                                                                                                                                                                                                                                 | 1,008  |
| S39 | (MH "Expert Systems")                                                                                                                                                                                                                                                                                            | 524    |
| S38 | TI ( (decision making N2 (system* or tool*)) ) OR AB ( (decision making N2 (system* or tool*)) )                                                                                                                                                                                                                 | 1,643  |
| S37 | TI ( (decision N2 support N2 (system* or tool*)) ) OR AB ( (decision N2 support N2 (system* or tool*)) )                                                                                                                                                                                                         | 3,935  |
| S36 | TI ( ("computer aided" N2 (decision* or diagnos* or therap*)) ) OR AB ( ("computer aided" N2 (decision* or diagnos* or therap*)) )                                                                                                                                                                               | 712    |
| S35 | TI ( ("computer aided" adj2 (decision* or diagnos* or therap* or support or treatment* or management)) ) OR AB                                                                                                                                                                                                   | 9      |

|     |                                                                                                                                                                                                                                                                                                            |           |
|-----|------------------------------------------------------------------------------------------------------------------------------------------------------------------------------------------------------------------------------------------------------------------------------------------------------------|-----------|
|     | ( ("computer aided" adj2 (decision* or diagnos* or therap* or support or treatment* or management) )                                                                                                                                                                                                       |           |
| S34 | TI ( ("computer assisted" N2 (decision* or diagnos* or therap* or support or treatment* or management)) ) OR AB ( ("computer assisted" N2 (decision* or diagnos* or therap* or support or treatment* or management)) )                                                                                     | 309       |
| S33 | (MH "Decision Support Systems, Clinical")                                                                                                                                                                                                                                                                  | 5,533     |
| S32 | (MH "Decision Making, Computer Assisted+")                                                                                                                                                                                                                                                                 | 45,289    |
| S31 | S6 AND S30                                                                                                                                                                                                                                                                                                 | 41,561    |
| S30 | S7 OR S8 OR S9 OR S10 OR S11 OR S12 OR S13 OR S14 OR S15 OR S16 OR S17 OR S18 OR S19 OR S20 OR S21 OR S22 OR S23 OR S24 OR S25 OR S26 OR S27 OR S28 OR S29                                                                                                                                                 | 1,131,998 |
| S29 | TI ( (telehealth or telecare or telemedicine OR mhealth or ehealth) ) OR AB ( (telehealth or telecare or telemedicine or mhealth or ehealth) )                                                                                                                                                             | 14,130    |
| S28 | TI ( (tablet N2 (pc or device* or comput*)) ) OR AB ( (tablet N2 (pc or device* or comput*)) ) or TI ((handheld or "hand held" N2 (pc or device* or comput*)) or AB ((handheld or "hand held" N2 (pc or device* or comput*))                                                                               | 3,837     |
| S27 | TI ( (iPad* or iPhone* or smartphone* or "smart phone*" or "smart device*" or "mobile phone*" or "android phone*" or cellphone* or "cell phone*") ) OR AB ( (iPad* or iPhone* or smartphone* or "smart phone*" or "smart device*" or "mobile phone*" or "android phone*" or cellphone* or "cell phone*") ) | 11,037    |
| S26 | TI (application* N2 mobile*) OR AB (application* N2 mobile*)                                                                                                                                                                                                                                               | 2,919     |
| S25 | TI ( (app or apps) ) OR AB ( (app or apps) )                                                                                                                                                                                                                                                               | 10,043    |
| S24 | TI "personal digital assistant*" OR AB "personal digital assistant*"                                                                                                                                                                                                                                       | 638       |
| S23 | TI ( (pda or pdas) ) OR AB ( (pda or pdas) )                                                                                                                                                                                                                                                               | 2,146     |
| S22 | TI ( automate* or automation ) OR AB ( automate* or automation )                                                                                                                                                                                                                                           | 22,986    |
| S21 | TI ( (software or "computer program*") ) OR AB ( (software or "computer program*") )                                                                                                                                                                                                                       | 50,295    |
| S20 | TI ( (internet or web or online or on-line) ) OR AB ( (internet or web or online or on-line) )                                                                                                                                                                                                             | 244,189   |
| S19 | TI electronic* OR AB electronic*                                                                                                                                                                                                                                                                           | 78,890    |

|                                                                                                                                                    |                                                          |         |
|----------------------------------------------------------------------------------------------------------------------------------------------------|----------------------------------------------------------|---------|
| S18                                                                                                                                                | TI computer* AND AB computer*                            | 9,388   |
| S17                                                                                                                                                | (MH "Electronic Health Records+")                        | 26,300  |
| S16                                                                                                                                                | (MH "Patient Record Systems+")                           | 34,339  |
| S15                                                                                                                                                | (MH "Telemedicine+")                                     | 15,487  |
| S14                                                                                                                                                | (MH "Mobile Applications")                               | 8,506   |
| S13                                                                                                                                                | (MH "Smartphone")                                        | 2,987   |
| S12                                                                                                                                                | (MH "Cellular Phone")                                    | 1,971   |
| S11                                                                                                                                                | (MH "Software")                                          | 29,588  |
| S10                                                                                                                                                | (MH "Internet")                                          | 50,622  |
| S9                                                                                                                                                 | (MH "Informatics+")                                      | 899,135 |
| S8                                                                                                                                                 | (MH "Information Systems+")                              | 197,429 |
| S7                                                                                                                                                 | (MH "Computers and Computerization+")                    | 746,390 |
| S6                                                                                                                                                 | S1 OR S2 OR S3 OR S4 OR S5                               | 173,388 |
| S5                                                                                                                                                 | TI (decision* N2 aid*) OR AB (decision* N2 aid*)         | 3,509   |
| S4                                                                                                                                                 | TI (decision* N2 support*) OR AB (decision* N2 support*) | 11,135  |
| S3                                                                                                                                                 | TI (decision* N2 making) OR AB (decision* N2 making)     | 68,249  |
| S2                                                                                                                                                 | (MH "Decision Support Techniques")                       | 6,986   |
| S1                                                                                                                                                 | (MH "Decision Making+")                                  | 111,200 |
| *, Interface - EBSCOhost Research Databases, Search Screen - Advanced Search, Database - CINAHL, Limiters/Expanders: Search modes - Boolean/Phrase |                                                          |         |

### 7. Cochrane Library search strategy

- #1 MeSH descriptor: [Decision Making] explode all trees 3960
- #2 MeSH descriptor: [Decision Support Techniques] explode all trees 2466
- #3 (decision\* near/2 making):ti,ab,kw (Word variations have been searched) 14369
- #4 ((decision\* near/2 support\*)):ti,ab,kw (Word variations have been searched) 3552

- #5 (decision\* near/2 aid\*):ti,ab,kw (Word variations have been searched) 1657
- #6 {or #1-#5} 20279
- #7 MeSH descriptor: [Computers] explode all trees 1732
- #8 MeSH descriptor: [Information Systems] explode all trees 2293
- #9 MeSH descriptor: [Informatics] explode all trees 8936
- #10 MeSH descriptor: [Patient Portals] this term only 19
- #11 MeSH descriptor: [Software] this term only 940
- #12 MeSH descriptor: [Mobile Applications] this term only 686
- #13 MeSH descriptor: [Cell Phone] explode all trees 1710
- #14 MeSH descriptor: [Telemedicine] explode all trees 2649
- #15 MeSH descriptor: [Medical Records Systems, Computerized] this term only 196
- #16 MeSH descriptor: [Electronic Health Records] 1 tree(s) exploded 359
- #17 (computer\*):ti,ab,kw (Word variations have been searched) 47867
- #18 (electronic\*):ti,ab,kw (Word variations have been searched) 17343
- #19 (internet or web or online or on-line):ti,ab,kw (Word variations have been searched) 32321
- #20 (software or "computer program\*"):ti,ab,kw (Word variations have been searched) 24140
- #21 (automate\* or automation):ti,ab,kw (Word variations have been searched) 8858
- #22 (pda or pdas):ti,ab,kw (Word variations have been searched) 1067
- #23 ("personal digital assistant\*"):ti,ab,kw (Word variations have been searched) 168
- #24 ((app or apps)):ti,ab,kw (Word variations have been searched) 4858
- #25 (application\* near/2 mobile\*):ti,ab,kw (Word variations have been searched) 2489
- #26 ((iPad\* or iPhone\* or smartphone\* or "smart phone\*" or "smart device\*" or "android phone" or "cellphone\*" or "cell phone\*")):ti,ab,kw (Word variations have been searched) 6453
- #27 ((tablet near/2 (pc or device\* or comput\*))) :ti,ab,kw (Word variations have been searched) 936
- #28 (("hand held" or handheld) near/2 (pc or device\* or comput\*)):ti,ab,kw 720



- #29 ((telehealth or telecare or telemedicine or eHealth or mHealth)):ti,ab,kw (Word variations have been searched) 6874
- #30 {or #7-#29} 124876
- #31 #6 and #30 7180
- #32 MeSH descriptor: [Decision Making, Computer-Assisted] explode all trees 4237
- #33 MeSH descriptor: [Decision Support Systems, Clinical] this term only 380
- #34 ((computer assisted near/2 (decision\* or diagnos\* or therap\* or support or treatment\* or management))):ti,ab,kw (Word variations have been searched) 2996
- #35 ((computer aided near/2 (decision\* or diagnos\* or therap\* or support or treatment\* or management))):ti,ab,kw (Word variations have been searched) 191
- #36 ((decision near/2 support near/2 (system\* or tool\*))):ti,ab,kw (Word variations have been searched) 1893
- #37 ((decision making near/2 (system\* or tool\*))):ti,ab,kw (Word variations have been searched) 241
- #38 MeSH descriptor: [Expert Systems] this term only 58
- #39 ((expert near/2 system\*)):ti,ab,kw (Word variations have been searched) 243
- #40 MeSH descriptor: [Reminder Systems] this term only 953
- #41 (((computer\* or electronic\*) near/2 (reminder\* or alert\*))):ti,ab,kw (Word variations have been searched) 445
- #42 (reminder system\*):ti,ab,kw (Word variations have been searched) 2798
- #43 ((medication or medicine or treatment or therapy) near/2 (reminder\* or alert)):ti,ab,kw 339
- #44 MeSH descriptor: [Medical Order Entry Systems] this term only 67
- #45 (((computer\* or electronic\*) near/2 order entry)):ti,ab,kw (Word variations have been searched) 119
- #46 (computer\* near/2 "decision support\*") 476
- #47 {or #32-#46} 10556
- #48 #31 or #47 15798
- #49 MeSH descriptor: [Allied Health Personnel] this term only 273
- #50 MeSH descriptor: [Allied Health Occupations] this term only 7
- #51 MeSH descriptor: [Physical Therapist Assistants] this term only 2

- #52 MeSH descriptor: [Physical Therapy Specialty] this term only 120
- #53 MeSH descriptor: [Speech-Language Pathology] this term only 67
- #54 MeSH descriptor: [Occupational Therapy] this term only 775
- #55 MeSH descriptor: [Nutritionists] this term only 44
- #56 MeSH descriptor: [Dietetics] this term only 96
- #57 MeSH descriptor: [Anesthesiologists] this term only 36
- #58 MeSH descriptor: [Podiatry] this term only 39
- #59 MeSH descriptor: [Osteopathic Physicians] this term only 3
- #60 (anesthesiologist\*):ti,ab,kw 7826
- #61 (podiatrist\*):ti,ab,kw 116
- #62 (prosthetist\*):ti,ab,kw 35
- #63 (chiropodist\*):ti,ab,kw 10
- #64 (orthoptist\*):ti,ab,kw 43
- #65 (orthotist\*):ti,ab,kw 32
- #66 (osteopath\*):ti,ab,kw 753
- #67 (radiographer\*):ti,ab,kw 132
- #68 ("art therapist\*"):ti,ab,kw 12
- #69 ("music therapist\*"):ti,ab,kw 137
- #70 (" drama therapist\*"):ti,ab,kw 2
- #71 ((allied near/2 health near/2 (profession\* or worker\* or personnel or occupation\* or staff))):ti,ab,kw (Word variations have been searched) 472
- #72 (((physical or occupational or language or speech) near/ therapist\*)):ti,ab,kw (Word variations have been searched) 31090
- #73 (physiotherapist\*):ti,ab,kw (Word variations have been searched) 5252
- #74 (dietitian\*):ti,ab,kw (Word variations have been searched) 2027
- #75 (nutritionist\*):ti,ab,kw (Word variations have been searched) 715
- #76 MeSH descriptor: [Patient Care Team] this term only 1700
- #77 (((multidisciplinary or "multi-disciplinary" or interdisciplinary or multiprofessional or "multi-professional" or interprofessional) near/2 team\*)):ti,ab,kw (Word variations have been searched) 2422
- #78 MeSH descriptor: [Emergency Medical Technicians] this term only 171

- #79 MeSH descriptor: [Emergency Medical Services] this term only  
1009
- #80 MeSH descriptor: [Air Ambulances] this term only 41
- #81 (paramedic\*):ti,ab,kw (Word variations have been searched) 1181
- #82 (HEMS):ti,ab,kw (Word variations have been searched) 242
- #83 (ems):ti,ab,kw (Word variations have been searched) 2707
- #84 (emt):ti,ab,kw (Word variations have been searched) 294
- #85 (prehospital):ti,ab,kw (Word variations have been searched) 1778
- #86 (pre-hospital):ti,ab,kw (Word variations have been searched) 672
- #87 ("first responder\*"):ti,ab,kw (Word variations have been searched)  
147
- #88 ("emergency medical technician\*"):ti,ab,kw (Word variations have  
been searched) 277
- #89 ("emergency services"):ti,ab,kw (Word variations have been searched)  
2743
- #90 (ambulance\*):ti,ab,kw (Word variations have been searched) 989
- #91 ("field triage"):ti,ab,kw (Word variations have been searched) 6
- #92 ("out-of-hospital"):ti,ab,kw (Word variations have been searched)  
1776
- #93 MeSH descriptor: [Nursing] explode all trees 3292
- #94 MeSH descriptor: [Nursing Care] explode all trees 1788
- #95 MeSH descriptor: [Nursing Staff] explode all trees 648
- #96 (nurse or nurses or nursing):ti,ab,kw (Word variations have been  
searched) 41946
- #97 MeSH descriptor: [Midwifery] this term only 329
- #98 (midwif\* or midwiv\*):ti,ab,kw (Word variations have been searched)  
2309
- #99 {or #49-#98} 99097
- #100 #48 AND #99 2266

Cochrane Database of Systematic Reviews = 58 Cochrane Trials =2205

## 8. Social Science Citation Index Search Strategy

| # | Search terms | Results |
|---|--------------|---------|
|---|--------------|---------|

|    |                                                                                                                                                                                                                                                                                                                                                                                                                                                                                                                                                                                                                                                                                                                                                                                                                                                                                                                                                                                                               |         |
|----|---------------------------------------------------------------------------------------------------------------------------------------------------------------------------------------------------------------------------------------------------------------------------------------------------------------------------------------------------------------------------------------------------------------------------------------------------------------------------------------------------------------------------------------------------------------------------------------------------------------------------------------------------------------------------------------------------------------------------------------------------------------------------------------------------------------------------------------------------------------------------------------------------------------------------------------------------------------------------------------------------------------|---------|
| #7 | #6 AND #5                                                                                                                                                                                                                                                                                                                                                                                                                                                                                                                                                                                                                                                                                                                                                                                                                                                                                                                                                                                                     | 2,297   |
| #6 | TS=((((("allied health" NEAR/2 (profession* OR worker* OR personnel OR occupation* OR staff) ) OR ("physical therapist" OR "physical therapists") OR ("occupational therapist" OR "occupational therapists") OR ("language therapist" OR "language therapists") OR ("speech therapist" OR "speech therapists") ) OR (physiotherapist* OR dietitian* OR dietetics OR nutritionist* or "music therapist*" or anesthesiologist* or orthoptist* or chiropodist* or podiatrist* or osteopath* or prosthetist* or orthotist* or radiographer* or "art therapist*" or "drama therapist*") OR ((multidisciplinary OR "multi-disciplinary" or interdisciplinary OR multiprofessional OR "multi-professional" or interprofessional) NEAR/2 team*) OR (nurse OR nurses OR nursing or paramedic* or HEMS or EMS or EMT or prehospital or "pre-hospital" or "first responder*" or "emergency medical technician*" or "emergency services" or ambulance* or "field triage" or "out-of-hospital" or midwif* or midwif* ) ))) | 228,344 |
| #5 | #4 AND #3                                                                                                                                                                                                                                                                                                                                                                                                                                                                                                                                                                                                                                                                                                                                                                                                                                                                                                                                                                                                     | 34,209  |
| #4 | TS=(("computer assisted decision*" OR "computer assisted diagnos*" OR "computer assisted therap*") OR ("computer aided decision*" OR "computer aided diagnos*" OR "computer aided therap*" or "computer aided support" or "computer aided treatment*" or "computer aided management" or "computer assisted support" or "computer assisted treatment*" OR "computer assisted management") OR ("decision support system*" OR "decision support or tool*") OR ("decision making system*" OR "decision making tool*") OR (expert NEAR/2 system*) OR (computer* NEAR/2 reminder* OR computer NEAR/2 alert* OR electronic* NEAR/2 reminder* OR electronic* NEAR/2 alert*) OR "reminder system*" OR "medical Order Entry System*" OR (computer* NEAR/2 "order entry") OR (electronic* NEAR/2 "order entry") OR (computer* near/2 "decision making") OR (medication or medicine or treatment or therapy) Near/2 (reminder* or alert*) )                                                                               | 13,896  |
| #3 | #2 AND #1                                                                                                                                                                                                                                                                                                                                                                                                                                                                                                                                                                                                                                                                                                                                                                                                                                                                                                                                                                                                     | 21,872  |
| #2 | TS=((((computer* OR electronic* OR internet OR web OR online OR on-line OR software OR computer program* OR automate* OR automation OR pda OR pdas OR "personal digital assistant*") OR (app OR apps OR application* NEAR/2 mobile* OR iPad* OR iPhone* OR smartphone* OR ("smart phone" OR "smart phones") OR ("smart device" OR "smart devices") ) OR ( "android phone*" or cellphone* or "cell phone*") OR (tablet NEAR/2 (pc OR device* OR comput*) ) OR (telehealth OR telecare OR telemedicine or mhealth or ehealth) )))                                                                                                                                                                                                                                                                                                                                                                                                                                                                               | 438,284 |

|    |                                                                                                      |         |
|----|------------------------------------------------------------------------------------------------------|---------|
| #1 | ((decision* near/2 making) OR TOPIC: (decision* near/2 support*) OR TOPIC: (decision* near/2 aid*) ) | 190,122 |
|----|------------------------------------------------------------------------------------------------------|---------|

## 9. Search Strategy Proquest ASSIA and Dissertations & Theses Abstracts & Index

ab((((decision\* NEAR/2 making) OR (decision\* NEAR/2 support\*) OR (decision\* NEAR/2 aid\*)) AND ((computer\* OR electronic\* OR internet OR web OR online OR on-line OR software OR computer program\* OR automate\* OR automation OR pda OR pdas OR "personal digital assistant\*") OR (app OR apps OR application\* NEAR/2 mobile\* OR iPad\* OR iPhone\* OR smartphone\* OR ("smart phone" OR "smart phones") OR ("smart device" OR "smart devices")) OR (tablet NEAR/2 (pc OR device\* OR comput\*)) OR (telehealth OR telecare OR telemedicine))) OR (("computer assisted decision\*" OR "computer assisted diagnos\*" OR "computer assisted therap\*") OR ("computer aided decision\*" OR "computer aided diagnos\*" OR "computer aided therap\*") OR ("decision support system\*" OR "decision support or tool\*") OR ("decision making system\*" OR "decision making tool\*") OR (expert NEAR/2 system\*) OR (computer\* NEAR/2 reminder\* OR computer NEAR/2 alert\* OR electronic\* NEAR/2 reminder\* OR electronic\* NEAR/2 alert\*) OR "reminder system\*" OR "medical Order Entry System\*" OR (computer\* NEAR/2 "order entry" OR electronic\* NEAR/2 "order entry")))) AND (("allied health" NEAR/2 (profession\* OR worker\* OR personnel OR occupation\* OR staff)) OR (("physical therapist" OR "physical therapists") OR ("occupational therapist" OR "occupational therapists") OR ("language therapist" OR "language therapists") OR ("speech therapist" OR "speech therapists")) OR (physiotherapist\* OR dietitian\* OR dietetics OR nutritionist\*) OR ((multidisciplinary OR interdisciplinary OR multiprofessional OR interprofessional) NEAR/2 team\*) OR (nurse OR nurses OR nursing or paramedic\* or HEMS or EMS or EMT or prehospital or "pre-hospital" or "first responder\*" or "emergency medical technician\*" or "emergency services" or ambulance\* or "field triage" or "out-of-hospital" or midwif\* or midwiv\* )) OR ti((((decision\* NEAR/2 making) OR (decision\* NEAR/2 support\*) OR (decision\* NEAR/2 aid\*)) AND ((computer\* OR electronic\* OR internet OR web OR online OR on-line OR software OR computer program\* OR automate\* OR automation OR pda OR pdas OR "personal digital assistant\*") OR (app OR apps OR application\* NEAR/2 mobile\* OR iPad\* OR iPhone\* OR smartphone\* OR ("smart phone" OR "smart phones") OR ("smart device" OR "smart devices")) OR (tablet NEAR/2 (pc OR device\* OR comput\*)) OR (telehealth OR telecare OR telemedicine))) OR (("computer assisted decision\*" OR "computer assisted diagnos\*" OR "computer assisted therap\*") OR ("computer aided decision\*" OR "computer aided diagnos\*" OR "computer aided therap\*") OR ("decision support system\*" OR "decision support or tool\*") OR ("decision making system\*" OR "decision making tool\*") OR (expert NEAR/2 system\*) OR (computer\* NEAR/2 reminder\* OR computer NEAR/2 alert\* OR electronic\* NEAR/2 reminder\* OR electronic\* NEAR/2 alert\*) OR "reminder system\*" OR "medical Order Entry System\*" OR (computer\* NEAR/2 "order entry" OR electronic\* NEAR/2 "order entry")))) AND (("allied health" NEAR/2 (profession\* OR worker\* OR personnel OR occupation\* OR staff)) OR (("physical therapist" OR "physical therapists") OR ("occupational therapist" OR "occupational therapists") OR ("language therapist" OR "language therapists") OR ("speech therapist" OR "speech therapists")) OR (physiotherapist\* OR dietitian\* OR dietetics OR nutritionist\*) OR ((multidisciplinary OR interdisciplinary OR multiprofessional OR interprofessional) NEAR/2 team\*) OR (nurse OR nurses OR nursing or paramedic\* or HEMS or EMS or EMT or prehospital or "pre-hospital" or "first responder\*" or "emergency medical technician\*" or "emergency services" or ambulance\* or "field triage" or "out-of-hospital" or midwif\* or midwiv\* ))

## **10. Search strategies -Clinicaltrials.gov, ICTRP, OpenGrey, OpenClinical, HealthIT.gov, Agency for Healthcare Research and Quality Health Information Technology website**

---

Search 1: Decision\* AND computer\*

Search 2: Decision\* AND web\*

Search 3: Decision\* AND online

Search 4: Decision\* AND software

Search 5: Decision\* AND device\*

Search 6: Decision\* AND mobile\*

## **11. Search strategy Health Services Research Projects in Progress**

(decision\*) AND (computer\* OR web\* OR online OR software OR device\* OR mobile\* AND allied OR therapist\* OR occupational OR therap\* OR physiotherapist OR physiotherapy))

**Supplementary Table 2: Risk of Bias assessment justifications using Effective Practice Organisation of Care (EPOC)'s tool**

## 1. Randomised controlled trials, non-randomised trials and controlled before-after studies

| Random sequence generation                                      | Allocation concealment                          | Baseline outcome measurements similar             | Baseline characteristics similar                                                                      | Incomplete outcome data                                                              | Knowledge of the allocated interventions adequately prevented during the study | Protection against contamination                                                                                                          | Selective outcome reporting                                                       | Other bias                                    | Overall bias score |
|-----------------------------------------------------------------|-------------------------------------------------|---------------------------------------------------|-------------------------------------------------------------------------------------------------------|--------------------------------------------------------------------------------------|--------------------------------------------------------------------------------|-------------------------------------------------------------------------------------------------------------------------------------------|-----------------------------------------------------------------------------------|-----------------------------------------------|--------------------|
| <b>Beckman et al, 2013</b>                                      |                                                 |                                                   |                                                                                                       |                                                                                      |                                                                                |                                                                                                                                           |                                                                                   |                                               |                    |
| "Simple randomisation was used to allocate nurses and patients" | Nurses and residents knew their allocated group | Reported baseline outcomes are broadly similar    | Baseline characteristics balanced/similar                                                             | No information if there was a problem of missing data or ways of handling it, if any | Assessors were not blinded                                                     | Intervention was allocated nursing homes, not individual patients                                                                         | All relevant outcomes in the methods section are reported in the results section  | There is no evidence of other risk of biases  | High               |
| <b>Blaha et al, 2009</b>                                        |                                                 |                                                   |                                                                                                       |                                                                                      |                                                                                |                                                                                                                                           |                                                                                   |                                               |                    |
| Not specified in paper.                                         | Not specified in paper.                         | No significant differences in glucose at baseline | Although reported for patients, baseline characteristics of nurses is not reported in text or tables. | Only 11 of 120 patients missing (9%)                                                 | The outcomes are objective.                                                    | Professionals were allocated within a clinic or practice and it is possible that communication between the two groups could have occurred | All relevant outcomes in the methods section are reported in the results section. | There is no evidence of other risk of biases. | Unclear            |
| <b>Byrne,2005</b>                                               |                                                 |                                                   |                                                                                                       |                                                                                      |                                                                                |                                                                                                                                           |                                                                                   |                                               |                    |
| Controlled before-after study.                                  | Controlled before-after study.                  | Models adjusted for covariates.                   | No report of baseline characteristics of patients or Nurses involved.                                 | Not specified in the paper.                                                          | Not specified in the paper.                                                    | Unit of allocation was the nursing home                                                                                                   | All relevant outcomes in the methods section are reported in the results section. | Multiple comparison                           | High               |
| <b>Canbolat et al,2019 (NRCT)</b>                               |                                                 |                                                   |                                                                                                       |                                                                                      |                                                                                |                                                                                                                                           |                                                                                   |                                               |                    |

| Random sequence generation                   | Allocation concealment                                 | Baseline outcome measurements similar                                             | Baseline characteristics similar                                                                                    | Incomplete outcome data                                           | Knowledge of the allocated interventions adequately prevented during the study | Protection against contamination                                                                                                                                          | Selective outcome reporting                                                       | Other bias                                                                    | Overall bias score |
|----------------------------------------------|--------------------------------------------------------|-----------------------------------------------------------------------------------|---------------------------------------------------------------------------------------------------------------------|-------------------------------------------------------------------|--------------------------------------------------------------------------------|---------------------------------------------------------------------------------------------------------------------------------------------------------------------------|-----------------------------------------------------------------------------------|-------------------------------------------------------------------------------|--------------------|
| Is Non-randomised trial.                     | It is an open label study.                             | No baseline measure of outcomes reported.                                         | No baseline information reported about the providers (Nurses); difference baseline characteristics patients present | Not specified in the paper.                                       | Not specified in the paper.                                                    | There was no randomisation; control and intervention groups were from the same clinic. Therefore, it is highly likely that control group could have received intervention | All relevant outcomes are reported in the results section.                        | No baseline (pre-intervention) outcomes data available so difficult to judge. | High               |
| <b>Cavalcanti et al, 2019</b>                |                                                        |                                                                                   |                                                                                                                     |                                                                   |                                                                                |                                                                                                                                                                           |                                                                                   |                                                                               |                    |
| 'Random numbers were generated by computer.' | 'Allocation was by centres at the start of the study.' | No baseline measure of outcomes reported in the paper.                            | Clinically significant differences in patients at baseline; no baseline information about HPs.                      | Outcomes reported were based on all participants (complete data). | Not specified in the paper.                                                    | Not specified in the paper.                                                                                                                                               | All relevant outcomes in the methods section are reported in the results section. | No evidence of other sources of bias.                                         | High               |
| <b>Cleveringa et al, 2008</b>                |                                                        |                                                                                   |                                                                                                                     |                                                                   |                                                                                |                                                                                                                                                                           |                                                                                   |                                                                               |                    |
| Block randomisation by practices and Nurses. | Unit of allocation was by practice.                    | Baseline outcomes were largely similar among the intervention and control groups. | Clinically significant differences in patients at baseline; no baseline information about HPs.                      | 'Values carried forward method' was used but not ideal method.    | Not specified in the paper.                                                    | Allocation unit was practice so unlikely that the control group received an intervention.                                                                                 | All relevant outcomes discussed in the objective are reported.                    | No evidence of other risk of biases.                                          | High               |



| Random sequence generation                  | Allocation concealment                                  | Baseline outcome measurements similar                       | Baseline characteristics similar                                            | Incomplete outcome data          | Knowledge of the allocated interventions adequately prevented during the study                                          | Protection against contamination                                                               | Selective outcome reporting                                                       | Other bias                           | Overall bias score |
|---------------------------------------------|---------------------------------------------------------|-------------------------------------------------------------|-----------------------------------------------------------------------------|----------------------------------|-------------------------------------------------------------------------------------------------------------------------|------------------------------------------------------------------------------------------------|-----------------------------------------------------------------------------------|--------------------------------------|--------------------|
| <b>Cleveringa et al,2010</b>                |                                                         |                                                             |                                                                             |                                  |                                                                                                                         |                                                                                                |                                                                                   |                                      |                    |
| Not specified in the paper.                 | Unit of allocation was primary care practice.           | Baseline outcome measurements are largely similar.          | There is no report of baseline characteristics of Nurses in text or tables. | Use of electronic health records | Not specified in the paper.                                                                                             | Allocation was by primary care practices so unlikely that control group received intervention. | All relevant outcomes set out in the objective were reported.                     | No evidence of other risk of biases. | High               |
| <b>Cortez, 2014</b>                         |                                                         |                                                             |                                                                             |                                  |                                                                                                                         |                                                                                                |                                                                                   |                                      |                    |
| Not specified in the paper.                 | Allocation was based on clinic and nurses.              | Outcome measurements were different among the two groups    | Baseline characteristics were largely similar in both groups.               | Use of electronic health records | 'The study participants (nurses) did not know about the other group's usage of CDSS at the start and during the study.' | Nurses in the intervention group did not know about or receive CDSS during study.              | All relevant outcomes in the methods section are reported in the results section. | No evidence of other risk of biases. | High               |
| <b>Dalaba et al, 2015</b>                   |                                                         |                                                             |                                                                             |                                  |                                                                                                                         |                                                                                                |                                                                                   |                                      |                    |
| A controlled before-after study.            | A controlled before-after study.                        | Baseline outcome measurements were significantly different. | No report of baseline characteristics of HPs in text or tables              | Not specified in the paper.      | Not specified in the paper.                                                                                             | Comparison groups were in different districts.                                                 | All outcomes mentioned in the methods section have been reported.                 | No indication of other biases.       | High               |
| <b>Duclos et al,2015</b>                    |                                                         |                                                             |                                                                             |                                  |                                                                                                                         |                                                                                                |                                                                                   |                                      |                    |
| Randomisation computer generated centrally. | Allocation was by department at the start of the study. | Baseline outcome measures appear to be                      | Only aggregated baseline characteristics of children for                    | Medical records were used.       | Not specified in the paper.                                                                                             | Not specified in the paper.                                                                    | All relevant outcomes in the methods section are reported in the results section. | No indication of other biases.       | High               |

| Random sequence generation     | Allocation concealment                                                  | Baseline outcome measurements similar                | Baseline characteristics similar                                                                                           | Incomplete outcome data     | Knowledge of the allocated interventions adequately prevented during the study                         | Protection against contamination                                                                                                        | Selective outcome reporting                    | Other bias                                                                                | Overall bias score |
|--------------------------------|-------------------------------------------------------------------------|------------------------------------------------------|----------------------------------------------------------------------------------------------------------------------------|-----------------------------|--------------------------------------------------------------------------------------------------------|-----------------------------------------------------------------------------------------------------------------------------------------|------------------------------------------------|-------------------------------------------------------------------------------------------|--------------------|
|                                |                                                                         | different and were not adjusted for during analysis. | the intervention and control groups; and, no report about the HP participants' baseline characteristics in tables or text. |                             |                                                                                                        |                                                                                                                                         |                                                |                                                                                           |                    |
| <b>Dumont et al,2012</b>       |                                                                         |                                                      |                                                                                                                            |                             |                                                                                                        |                                                                                                                                         |                                                |                                                                                           |                    |
| Simple randomisation used      | Randomisation was achieved by a Nurse choosing unmarked sealed envelope | No baseline measure of outcome reported.             | Patient characteristics reported and largely similar, but report on HP were presented as aggregated.                       | Not specified in the paper. | Not specified in the paper.                                                                            | Nurses were allocated within a clinic and it is possible that communication between intervention and control nurse could have occurred. | All outcomes in methods section were reported. | Performance bias risk from knowledge of cases, protocols and contamination highly likely. | High               |
| <b>Dykes et al, 2009</b>       |                                                                         |                                                      |                                                                                                                            |                             |                                                                                                        |                                                                                                                                         |                                                |                                                                                           |                    |
| Not specified in the paper     | Allocation was by unit at the start of the study                        | Baseline outcome measurements are largely similar.   | Patient characteristics were similar, but no information on HPs.                                                           | Medical records were used.  | Study noted as open-label design in the protocol; and, intervention and control units in one hospital. | Contamination of information highly likely; patients rather than professionals were randomised                                          | All outcomes in methods section were reported. | No indication of other biases.                                                            | High               |
| <b>Fitzmaurice et al, 2000</b> |                                                                         |                                                      |                                                                                                                            |                             |                                                                                                        |                                                                                                                                         |                                                |                                                                                           |                    |

| Random sequence generation                       | Allocation concealment                   | Baseline outcome measurements similar                      | Baseline characteristics similar                                                                          | Incomplete outcome data                 | Knowledge of the allocated interventions adequately prevented during the study | Protection against contamination                                                          | Selective outcome reporting                                                                    | Other bias                                                                                        | Overall bias score |
|--------------------------------------------------|------------------------------------------|------------------------------------------------------------|-----------------------------------------------------------------------------------------------------------|-----------------------------------------|--------------------------------------------------------------------------------|-------------------------------------------------------------------------------------------|------------------------------------------------------------------------------------------------|---------------------------------------------------------------------------------------------------|--------------------|
| 'Randomisation was computer generated.'          | Not specified in the paper               | Baseline outcome measurements are largely similar.         | There is no report of baseline characteristics of HPs in text or tables                                   | Use of medical records.                 | Outcomes are objective.                                                        | Groups in same practice— possibility of communication between health professionals        | All relevant outcomes in the introduction/methods section are reported in the results section. | No evidence of other risk of biases.                                                              | High               |
| <b>Forberg et al,2016</b>                        |                                          |                                                            |                                                                                                           |                                         |                                                                                |                                                                                           |                                                                                                |                                                                                                   |                    |
| 'A simple draw from the list by a third person.' | Not specified in the paper               | Baseline measure of outcomes appear to be largely similar. | Baseline characteristics of the intervention and control groups are similar.                              | Missing outcomes is very minimal (<2%). | Not specified in the paper.                                                    | Not clear that nurses did not swap between units within the same hospital.                | All relevant outcomes in the methods section are reported in the results section.              | No evidence of other risk of biases.                                                              | High               |
| <b>Fossum et al,2011</b>                         |                                          |                                                            |                                                                                                           |                                         |                                                                                |                                                                                           |                                                                                                |                                                                                                   |                    |
| Controlled before-after study                    | Controlled before-after study            | Baseline outcome measurements are largely similar.         | Although reported for patients, baseline characteristics of providers was not reported in text or tables. | Use medical records.                    | Not specified in the paper.                                                    | Allocation was by nursing homes and is unlikely that control group received intervention. | All relevant outcomes in the methods section are reported in the results section.              | No evidence of other risk of biases.                                                              | High               |
| <b>Geurts et al, 2016</b>                        |                                          |                                                            |                                                                                                           |                                         |                                                                                |                                                                                           |                                                                                                |                                                                                                   |                    |
| 'Computer generated randomisation was used.'     | 'Centralised randomisation scheme used.' | No baseline measure of outcome in the paper.               | Baseline characteristics are largely similar among the two groups.                                        | Medical records used.                   | 'Nurses were blinded for the contribution of predictors on the risk score.'    | Patient based randomisation; a high possibility. Intra clinician and inter clinician      | All relevant outcomes in the methods section are reported in the results section.              | Question about representativeness of final study sample as 75% of eligible kids not randomised as | High               |

| Random sequence generation                                               | Allocation concealment                                                                              | Baseline outcome measurements similar                 | Baseline characteristics similar                                                                                    | Incomplete outcome data             | Knowledge of the allocated interventions adequately prevented during the study | Protection against contamination                                                                  | Selective outcome reporting                                                       | Other bias                             | Overall bias score |
|--------------------------------------------------------------------------|-----------------------------------------------------------------------------------------------------|-------------------------------------------------------|---------------------------------------------------------------------------------------------------------------------|-------------------------------------|--------------------------------------------------------------------------------|---------------------------------------------------------------------------------------------------|-----------------------------------------------------------------------------------|----------------------------------------|--------------------|
|                                                                          |                                                                                                     |                                                       |                                                                                                                     |                                     |                                                                                | contamination highly possible.                                                                    |                                                                                   | professional or parents non-compliant. |                    |
| <b>Hovorka et al, 2007</b>                                               |                                                                                                     |                                                       |                                                                                                                     |                                     |                                                                                |                                                                                                   |                                                                                   |                                        |                    |
| 'randomisation based on computer algorithm'                              | Centralised randomisation scheme was used.                                                          | No baseline measure of outcome reported in the paper. | Although some report about patients, no report of baseline characteristics about HP participants in text or tables. | Not specified in the paper.         | The outcomes were objective.                                                   | patients based randomisation; same clinicians involved in standard and intervention arms          | All relevant outcomes in the methods section are reported in the results section. | No evidence of other risk of biases.   | High               |
| <b>Kroth et al, 2006</b>                                                 |                                                                                                     |                                                       |                                                                                                                     |                                     |                                                                                |                                                                                                   |                                                                                   |                                        |                    |
| 'Randomisation using coin flip.'                                         | Not specified in the paper.                                                                         | No baseline measure of outcome.                       | There is no detailed report of characteristics in text or tables.                                                   | Consecutive [medical] records used. | objective outcome                                                              | Randomisation was for patients and nurses. Nurses in the control group did not receive reminders. | All relevant outcomes in the methods section are reported in the results section. | No evidence of other risk of biases.   | High               |
| <b>Lattimer et al, 1998</b>                                              |                                                                                                     |                                                       |                                                                                                                     |                                     |                                                                                |                                                                                                   |                                                                                   |                                        |                    |
| 'A random number generator pocket calculator (Hewlett Packard 21s) used' | Unit of allocation was by team and allocation was performed on all units at the start of the study. | No baseline measure of outcome reported.              | Some about patients, but no report of baseline characteristics HPs in text or tables.                               | Not specified in the paper.         | Use of medical records.                                                        | Health professionals in the intervention (Nurses) and control (Doctors) were different.           | All relevant outcomes in the methods section are reported in the results section. | No evidence of other risk of biases.   | Unclear            |

| Random sequence generation            | Allocation concealment      | Baseline outcome measurements similar                                            | Baseline characteristics similar                                     | Incomplete outcome data     | Knowledge of the allocated interventions adequately prevented during the study | Protection against contamination                                                                  | Selective outcome reporting                                                       | Other bias                           | Overall bias score |
|---------------------------------------|-----------------------------|----------------------------------------------------------------------------------|----------------------------------------------------------------------|-----------------------------|--------------------------------------------------------------------------------|---------------------------------------------------------------------------------------------------|-----------------------------------------------------------------------------------|--------------------------------------|--------------------|
| <b>Lattimer et al,2000</b>            |                             |                                                                                  |                                                                      |                             |                                                                                |                                                                                                   |                                                                                   |                                      |                    |
| Not specified in the paper.           | Not specified in the paper. | Not specified in the paper.                                                      | There is no detailed report of characteristics in text or tables     | Not specified in the paper. | Use of medical records.                                                        | Health professionals in the intervention (Nurses) and control (Doctors) were different.           | All relevant outcomes in the methods section are reported in the results section. | No evidence of other risk of biases. | Unclear            |
| <b>Lee et al, 2009</b>                |                             |                                                                                  |                                                                      |                             |                                                                                |                                                                                                   |                                                                                   |                                      |                    |
| Not specified in the paper.           | Not specified in the paper. | Although weight and BMI data were recorded, no data on the outcome measurements. | Reported for patients, but no report on providers in text or tables. | Not specified in the paper. | Not specified in the paper.                                                    | Patients based randomisation so it is likely that the control group received the intervention.    | All relevant outcomes in the methods section are reported in the results section. | No evidence of other risk of biases. | High               |
| <b>Lv et al, 2019</b>                 |                             |                                                                                  |                                                                      |                             |                                                                                |                                                                                                   |                                                                                   |                                      |                    |
| Not specified in the paper.           | Not specified in the paper. | Not specified in the paper.                                                      | Reported for patients, but no report on providers in text or tables. | Not specified in the paper. | Not specified in the paper.                                                    | Patients based randomisation; Patient based randomisation; same clinicians involved in both arms. | All relevant outcomes in the methods section are reported in the results section. | No evidence of other risk of biases. | High               |
| <b>Mann et al,2011</b>                |                             |                                                                                  |                                                                      |                             |                                                                                |                                                                                                   |                                                                                   |                                      |                    |
| Computer generated sequence was used. | Not specified in the paper. | Baseline measure of outcome not reported.                                        | No baseline characteristics of HPs in text or tables were found.     | Not clear from the paper.   | A cross-over study; not specified in the paper.                                | Acrossover trial with only patients rather than professionals randomised.                         | All relevant outcomes in the methods section are reported in the results section. | No evidence of other risk of biases. | High               |

| Random sequence generation              | Allocation concealment                        | Baseline outcome measurements similar                               | Baseline characteristics similar                                      | Incomplete outcome data               | Knowledge of the allocated interventions adequately prevented during the study | Protection against contamination                                                                                                     | Selective outcome reporting                                                       | Other bias                                                                                                                                                   | Overall bias score |
|-----------------------------------------|-----------------------------------------------|---------------------------------------------------------------------|-----------------------------------------------------------------------|---------------------------------------|--------------------------------------------------------------------------------|--------------------------------------------------------------------------------------------------------------------------------------|-----------------------------------------------------------------------------------|--------------------------------------------------------------------------------------------------------------------------------------------------------------|--------------------|
| <b>McDonald et al, 2017</b>             |                                               |                                                                     |                                                                       |                                       |                                                                                |                                                                                                                                      |                                                                                   |                                                                                                                                                              |                    |
| Automated block randomisation was used. | Automated block randomisation schema was used | Not specified in the paper.                                         | Baseline characteristics were largely similar.                        | Possible medical records use.         | Assessor was not blinded.                                                      | Both intervention and control nurses were in one organisation and it is possible that communication between them could have occurred | All relevant outcomes in the methods section are reported in the results section. | Only 42% of patients who should have had a CDSS applied suggesting that the nurses selectively chose which patients to use it with or selective non adoption | High               |
| <b>Paulson et al, 2020</b>              |                                               |                                                                     |                                                                       |                                       |                                                                                |                                                                                                                                      |                                                                                   |                                                                                                                                                              |                    |
| Automated block randomisation was used. | Automated block randomisation schema was used | Reported for patients, but no report on providers in text or tables | Baseline characteristics were largely similar                         | Only complete case analysis conducted | Outcomes are objective                                                         | Both intervention and control nurses were in one organisation and it is possible that communication between them could have occurred | All relevant outcomes in the methods section are reported in the results section. | No evidence of other risk of biases.                                                                                                                         | High               |
| <b>Plank et al, 2006</b>                |                                               |                                                                     |                                                                       |                                       |                                                                                |                                                                                                                                      |                                                                                   |                                                                                                                                                              |                    |
| Not specified in the paper              | Not specified in the paper                    | Blood glucose measured but not intervention group based             | Differences in types of surgery and history of diabetes between sites | Use of medical records.               | Outcomes are objective.                                                        | same units delivering all arms of the trial with same clinicians                                                                     | All relevant outcomes in the methods section are reported in the results section. | No evidence of other risk of biases.                                                                                                                         | High               |
| <b>Rood et al, 2005</b>                 |                                               |                                                                     |                                                                       |                                       |                                                                                |                                                                                                                                      |                                                                                   |                                                                                                                                                              |                    |

| Random sequence generation                     | Allocation concealment                                                                                                | Baseline outcome measurements similar                      | Baseline characteristics similar                                                      | Incomplete outcome data                                                                                | Knowledge of the allocated interventions adequately prevented during the study | Protection against contamination                                                                                                                                       | Selective outcome reporting                                                       | Other bias                           | Overall bias score |
|------------------------------------------------|-----------------------------------------------------------------------------------------------------------------------|------------------------------------------------------------|---------------------------------------------------------------------------------------|--------------------------------------------------------------------------------------------------------|--------------------------------------------------------------------------------|------------------------------------------------------------------------------------------------------------------------------------------------------------------------|-----------------------------------------------------------------------------------|--------------------------------------|--------------------|
| 'Automatic random number generating'           | Not specified in the paper                                                                                            | Baseline measure of outcome not reported.                  | No report of characteristics of HPs in text or tables.                                | Not specified in the paper.                                                                            | Not specified in the paper.                                                    | Patient based randomisation; same clinicians involved in both arms.                                                                                                    | There is no evidence that outcomes were selectively reported.                     | No evidence of other risk of biases. | High               |
| <b>Roukema et al,2008</b>                      |                                                                                                                       |                                                            |                                                                                       |                                                                                                        |                                                                                |                                                                                                                                                                        |                                                                                   |                                      |                    |
| Randomisation was based on computer algorithm. | 'centralised randomisation scheme'                                                                                    | Baseline measure of outcome not reported                   | No report of characteristics of HPs in text or tables.                                | Not specified in the paper.                                                                            | Not specified in the paper.                                                    | professionals were allocated within a clinic so hard to see how decision rule training effect not present in the clinicians who were delivering both arms of the trial | All relevant outcomes in the methods section are reported in the results section. | No evidence of other risk of biases. | High               |
| <b>Sassen et al,2014</b>                       |                                                                                                                       |                                                            |                                                                                       |                                                                                                        |                                                                                |                                                                                                                                                                        |                                                                                   |                                      |                    |
| Not specified in the paper.                    | The unit of allocation was by health professional and allocation was performed on all units at the start of the study | No important differences were present across study groups. | Baseline characteristics of the study and control providers are reported and similar. | Significant proportion participants dropped out and the report is based on the complete case analysis. | Outcomes cannot be assessed blindly.                                           | Participants in the control group did not have a log-in code to access the website (CDSS tool) until post-intervention data were collected.                            | All relevant outcomes in the methods section are reported in the results section. | No evidence of other risk of biases. | High               |
| <b>Snooks et al, 2014</b>                      |                                                                                                                       |                                                            |                                                                                       |                                                                                                        |                                                                                |                                                                                                                                                                        |                                                                                   |                                      |                    |

| Random sequence generation                 | Allocation concealment                                                  | Baseline outcome measurements similar     | Baseline characteristics similar                                              | Incomplete outcome data     | Knowledge of the allocated interventions adequately prevented during the study | Protection against contamination                                                                                   | Selective outcome reporting                                                       | Other bias                                                      | Overall bias score |
|--------------------------------------------|-------------------------------------------------------------------------|-------------------------------------------|-------------------------------------------------------------------------------|-----------------------------|--------------------------------------------------------------------------------|--------------------------------------------------------------------------------------------------------------------|-----------------------------------------------------------------------------------|-----------------------------------------------------------------|--------------------|
| Randomisation based on computer algorithm. | Random allocation was performed on all units at the start of the study. | No baseline measure of outcome reported.  | No report of characteristics in text or tables about the paramedics involved. | Not specified in the paper. | Analyst was blinded.                                                           | Intervention and control groups were in separates sites                                                            | All relevant outcomes in the methods section are reported in the results section. | No evidence of other risk of biases.                            | Unclear            |
| <b>Vadher et al, 1997</b>                  |                                                                         |                                           |                                                                               |                             |                                                                                |                                                                                                                    |                                                                                   |                                                                 |                    |
| Random tables were used.                   | Not specified in the paper.                                             | No baseline measure of outcome reported.  | Patient baseline characteristics reported; one nurse versus a clinician.      | Not specified in the paper. | Outcomes are objectively measured.                                             | Hard to see how same clinicians seeing both arm trial patients didn't pick up something from the CDSS.             | All relevant outcomes in the methods section are reported in the results section. | There was only one Nurse participant in the intervention group. | High               |
| <b>Wells,2013</b>                          |                                                                         |                                           |                                                                               |                             |                                                                                |                                                                                                                    |                                                                                   |                                                                 |                    |
| Random table was used for randomisation.   | Not specified in the paper.                                             | No baseline measure of outcomes reported. | Baseline characteristics are largely similar.                                 | Not specified in the paper. | Outcomes were assessed blindly.                                                | Intervention and control groups in the same site so it is likely that the control group received the intervention. | All relevant outcomes in the methods section are reported in the results section  | No evidence of other risk of biases.                            | High               |

Colour codes: Red, high risk; orange, unclear risk; green, low risk



## 2. Interrupted time series studies

| Author & Year      | Risk of bias domains and scores                                                                               |                                                                                        |                                                                                                |                                                                                |                                    |                                                                                   |                                      | Overall bias |
|--------------------|---------------------------------------------------------------------------------------------------------------|----------------------------------------------------------------------------------------|------------------------------------------------------------------------------------------------|--------------------------------------------------------------------------------|------------------------------------|-----------------------------------------------------------------------------------|--------------------------------------|--------------|
|                    | Intervention independent of other changes                                                                     | Shape of the intervention effect pre-specified                                         | Intervention unlikely to affect data collection                                                | Knowledge of the allocated interventions adequately prevented during the study | Incomplete outcome data adequately | Selective outcome reporting                                                       | Other bias                           |              |
| Bennet, 2016       | Very long adoption period with no measurement; possible confounding factors not presented/models not adjusted | Data were classified as pre and post-intervention from the point/date of intervention. | Data were collected from the hospital records databases for pre- and post-intervention periods | Not presented in the paper.                                                    | Medical records used               | All relevant outcomes in the methods section are reported in the results section. | No evidence of other risk of biases. | High         |
| Dykes et al,2020   | Highly likely the changes in outcome to be influenced by confounders.                                         | Point of analysis is the point of intervention.                                        | Sources and methods of data collection were the same before and after the intervention.        | Not presented in the paper.                                                    | Medical records used               | All relevant outcomes are reported in the results section                         | No evidence of other risk of biases. | High         |
| Dowding et al,2012 | Highly likely the changes in outcome to be influenced by confounders.                                         | Point of analysis is the point of intervention.                                        | Sources and methods of data collection were the same before and after the intervention.        | Not presented in paper.                                                        | Medical records used               | All relevant outcomes are reported in the results section.                        | No evidence of other risk of biases. | High         |

Colour codes: Red, high risk; orange, unclear risk; green, low risk

Supplementary Table 3: Summary of patient care process results

| Author & Year                                                    | Interventions     | Health professionals | patient participants | Outcome measured                                                                                   | Outcome values reported             | Change of value within a group <sup>‡</sup> | Risk difference (95% CI) <sup>‡</sup>  |
|------------------------------------------------------------------|-------------------|----------------------|----------------------|----------------------------------------------------------------------------------------------------|-------------------------------------|---------------------------------------------|----------------------------------------|
| <b>1. Adherence to guidelines</b>                                |                   |                      |                      |                                                                                                    |                                     |                                             |                                        |
| Dumont et al, 2012                                               | • CDSS use        | Nurses (OA=44)       | 141 adults           | Deviations from the protocol, out of 10 (mean (SD))                                                | 4 months=0.39(1.0)                  | -                                           | Mean difference: -2.61 (-4.5 to -0.71) |
|                                                                  | • Paper protocol  | Nurses               | 159 adults           |                                                                                                    | 4 months=3.0(4.3)                   |                                             |                                        |
| Forberg et al, 2016                                              | • CDSS-use        | 108 Nurses           | Not applicable       | Nurses adherence to guidelines on disinfection of hands                                            | Baseline=97/108<br>3 months =93/105 | -1.2%                                       | 6.7% (4.9 to 8.5)                      |
|                                                                  | • CDSS non-use    | 103 Nurses           | Not applicable       |                                                                                                    | Baseline=96/103<br>3 months=87/102  | -7.9%                                       |                                        |
|                                                                  | • CDSS-use        |                      |                      | Nurses adherence to guidelines on usage of disposable gloves (n/N)                                 | Baseline=80/108<br>3 months =76/105 | -1.7%                                       | -1.4% (-2.2 to -0.5)                   |
|                                                                  | • CDSS non-use    |                      |                      |                                                                                                    | Baseline=71/103<br>3 months =70/102 | -0.3%                                       |                                        |
|                                                                  | • CDSS-use        |                      |                      | Nurses adherence to guidelines on daily inspection of Peripheral Venous Catheters (PVC) site (n/N) | Baseline=58/108<br>3 months =58/103 | 2.6%                                        | -5.2% (-7.1 to -3.3)                   |
|                                                                  | • CDSS non-use    |                      |                      |                                                                                                    | Baseline=47/102<br>3 months =55/102 | 7.8%                                        |                                        |
| Rood et al, 2005                                                 | • CDSS-based GL   | ICU Nurses           | 66 adults            | Adherence to Insulin dose Advice (n/N)                                                             | 10 weeks =1818/2352                 | -                                           | 22% (19 to 25)                         |
|                                                                  | • Paper-based GL  | ICU Nurses           | 54 adults            |                                                                                                    | 10 weeks =1667/2597                 | -                                           |                                        |
|                                                                  | • CDSS-based GL   | ICU Nurses           | 66 adults            | Adherence to the guideline for taking blood samples on time (n/N)                                  | 10 weeks =945/2352                  | -                                           | 4.7% (2.0 to 7.4)                      |
|                                                                  | • Paper-based GL  | ICU Nurses           | 54 adults            |                                                                                                    | 10 weeks =922/2597                  | -                                           |                                        |
| Vadher et al, 1997                                               | • CDSS            | 1 Nurse              | 87 adults            | Dose advice 'acceptance' in patients with therapeutic range 2-3                                    | Post-test =188/214                  | -                                           | 28% (20.4 to 35.5)                     |
|                                                                  | • Control         | 3 trainee Doctors    | 90 adults            |                                                                                                    | Post-test=145/242                   | -                                           |                                        |
|                                                                  | • CDSS            | 1 Nurse              |                      | Dose advice 'acceptance' in patients with therapeutic range 3-4.5 (n/N)                            | Post-test =160/239                  | -                                           | -6.2% (-14.7 to 2.2)                   |
|                                                                  | • Control         | 3 trainee Doctors    |                      |                                                                                                    | Post-test=150/205                   | -                                           |                                        |
|                                                                  | • CDSS            | 1 Nurse              |                      | Interval advice 'acceptance' (%) in patients with therapeutic range 2-3                            | Post-test =170/230                  | -                                           | 23.9% (15.6 to 32.2)                   |
|                                                                  | • Control         | 3 trainee Doctors    |                      |                                                                                                    | Post-test=133/266                   | -                                           |                                        |
|                                                                  | • CDSS            | 1 Nurse              |                      | Interval advice 'acceptance' (%) in patients with therapeutic range 3-4.5                          | Post-test =129/239                  | -                                           | 3.9% (-5.4 to 13.3)                    |
|                                                                  | • Control         | 3 trainee Doctors    |                      |                                                                                                    | Post-test=101/202                   | -                                           |                                        |
| <b>2. Patient assessment, diagnosis, and treatment practices</b> |                   |                      |                      |                                                                                                    |                                     |                                             |                                        |
|                                                                  | • CDSS use period |                      |                      | Pain assessment                                                                                    | Post-test=97.7%                     | -                                           | 62.7% (59.6 to 65.8)                   |

|                     |                |               |                |                                                       |                     |   |                           |
|---------------------|----------------|---------------|----------------|-------------------------------------------------------|---------------------|---|---------------------------|
| Bennett et al, 2016 | • CDSS non use |               |                |                                                       | Pre-test=35%        |   |                           |
|                     | • CDSS use     |               |                | IV antibiotics in 1hr for sepsis                      | Post-test=5.6%      | - | -5.9% (-8.3 to -3.5)      |
|                     | • CDSS non use |               |                |                                                       | Pre-test=11.5%      |   |                           |
| Duclos et al, 2015  | • CDSS         | Dieticians    | 667 children   | Investigation of malnutrition aetiology               | Post-test=284/667   | - | 21.2% (15.9 to 26.5)      |
|                     | • Usual care   | Dieticians    | 477 children   |                                                       | Post-test=102/477   |   |                           |
|                     | • CDSS         | Dieticians    | 667 children   | Managed by a dietitian                                | Post-test=305/667   | - | 12% (6.3 to 17.7)         |
|                     | • Usual care   | Dieticians    | 477 children   |                                                       | Post-test=161/477   |   |                           |
|                     | • CDSS         | Dieticians    | 667 children   | prescribed refeeding protocol                         | Post-test=230/667   | - | -4.5% (-10.2 to 1.2)      |
|                     | • Usual care   | Dieticians    | 477 children   |                                                       | Post-test=186/477   |   |                           |
| Geurts et al, 2017  | • CDSS         | Nurses        | 113 children   | Patient consultation time(min)-median (IQR)           | Post-test =136(108) | - | 3 min                     |
|                     | • Usual care   | Nurses        | 109 children   |                                                       | Post-test =133(92)  |   |                           |
|                     | • CDSS         | Nurses        | 113 children   | Electrolytes level test                               | Post-test =15/113   | - | -7.8% (-17.7 to 2.1)      |
|                     | • Usual care   | Nurses        | 109 children   |                                                       | Post-test =23/109   |   |                           |
|                     | • CDSS         | Nurses        | 113 children   | Acid-base balance test                                | Post-test =13/113   | - | -3.2% (-12.1 to 5.7)      |
|                     | • Usual care   | Nurses        | 109 children   |                                                       | Post-test =16/109   |   |                           |
|                     | • CDSS         | Nurses        | 113 children   | Oral Rehydration Solution (nasogastric tube)          | Post-test =17/113   | - | 6.7% (-1.6 to 15.2)       |
|                     | • Usual care   | Nurses        | 109 children   |                                                       | Post-test =9/109    |   |                           |
|                     | • CDSS         | Nurses        | 113 children   | IV rehydration given                                  | Post-test =0/113    | - | -1.8% (-4.4 to 0.7)       |
|                     | • Usual care   | Nurses        | 109 children   |                                                       | Post-test =2/109    |   |                           |
|                     | • CDSS         | Nurses        | 113 children   | Other liquid given                                    | Post-test =18/113   | - | -11.6% (-22.4 to -0.8)    |
|                     | • Usual care   | Nurses        | 109 children   |                                                       | Post-test =30/109   |   |                           |
| Roukema et al, 2008 | • CDSS use     | Nurses        | 74 children    | Time spent in ED (minutes), median (IQR)              | 27 months =138 (77) | - | 15 minutes                |
|                     | • Control      | Nurses        | 90 children    |                                                       | 27 months =123 (96) |   |                           |
|                     | • CDSS use     | Nurses        | 74 children    | Time spent in ED for lab test (minutes), median (IQR) | 27 months =140 (68) | - | -20 minutes               |
|                     | • Control      | Nurses        | 90 children    |                                                       | 27 months =160 (98) |   |                           |
| Snooks et al, 2014  | • CDSS         | 17 Paramedics | 436 adults     | Mean length of episode of care (minutes)              | CDSS Vs control     | - | -5.7 min (-38.5 to 27.2)* |
|                     | • Control      | 19 Paramedics | 343 adults     |                                                       |                     |   |                           |
| Wells, 2013         | • CDSS         | 22 paramedics | 436 adults     | Respiratory rate recorded, %                          | 1 year =405/436     | - | -1.2% (-4.7 to 2.2)       |
|                     | • Control      | 20 paramedics | 341 adults     |                                                       | 1 year =321/341     |   |                           |
|                     | • CDSS         | 22 paramedics | 436 adults     | Pulse rate recorded                                   | 1 year =414/436     | - | 0.9% (-3.9 to 2.0)        |
|                     | • Control      | 20 paramedics | 341 adults     |                                                       | 1 year =327/341     |   |                           |
|                     | • CDSS         | 22 paramedics | 436 adults     | Consciousness recorded                                | 1 year =405/436     | - | -5.1% (-7.9 to -2.2)      |
|                     | • Control      | 20 paramedics | 341 adults     |                                                       | 1 year =334/341     |   |                           |
| Kroth et al, 2006   | • CDSS use     | 164 Nurses    | Not applicable | Proportion of erroneously recorded temperatures       | 9 months =248/45823 | - | -0.8% (-0.9 to -0.6)      |
|                     | • Control      | 173 Nurses    | Not applicable |                                                       | 9 months =575/44339 |   |                           |

### 3. Documenting of events

|                             |                |               |            |                                                                  |                                      |   |                                 |
|-----------------------------|----------------|---------------|------------|------------------------------------------------------------------|--------------------------------------|---|---------------------------------|
| Dowding et al, 2012         | • CDSS use     | Nurses        |            | Fall documentation ratio                                         | Post-CDSS use Vs pre-CDSS use period | - | 1.4 (0.03 to 73.7) <sup>†</sup> |
|                             | • CDSS non-use | Nurses        |            |                                                                  |                                      |   |                                 |
|                             | • CDSS use     |               |            | Hospital acquired pressure ulcer (HAPU) risk documentation ratio | Post-CDSS use Vs pre-CDSS use period | - | 9.1 (1.95 to 42.5) <sup>†</sup> |
|                             | • CDSS non-use |               |            |                                                                  |                                      |   |                                 |
| Paulson et al, 2020         | • CDSS use     | Nurses        | 44 adults  | Documentation of nutritional intake compared to requirements     | 10 months=37/44                      | - | 80% (67 to 92)                  |
|                             | • Usual care   | Nurses        | 50 adults  |                                                                  | 10 months=2/50                       |   |                                 |
|                             | • CDSS use     | Nurses        | 44 adults  | Documentation of a nutritional care plan                         | 10 months=31/44                      | - | 54.4% (37.6 to 71.3)            |
|                             | • Usual care   | Nurses        | 50 adults  |                                                                  | 10 months=8/50                       |   |                                 |
|                             | • CDSS use     | Nurses        | 44 adults  | Documentation of nutritional treatment                           | 10 months=36/44                      | - | 23.8% (6 to 41.6)               |
|                             | • Usual care   | Nurses        | 50 adults  |                                                                  | 10 months=29/50                      |   |                                 |
| <b>4. Patient referrals</b> |                |               |            |                                                                  |                                      |   |                                 |
| Snooks et al, 2014          | • CDSS         | 17 Paramedics | 436 adults | Patients referred to falls service                               | 1 year=42/436                        | - | 4.7% (1.1 to 8.3)               |
|                             | • Control      | 19 Paramedics | 343 adults |                                                                  | 1 year=17/343                        |   |                                 |

Note: ‡, calculated from reported information unless stated otherwise; †, as reported by study authors.

Supplementary Table 4: Summary of patient care outcomes results

| Author & Year               | Interventions                                                                                                                                                            | Health professionals | patient participants | Outcome measured                                              | Outcome values reported             | Change of value within a group <sup>‡</sup> | Risk difference (95% CI) <sup>‡</sup>                                               |      |
|-----------------------------|--------------------------------------------------------------------------------------------------------------------------------------------------------------------------|----------------------|----------------------|---------------------------------------------------------------|-------------------------------------|---------------------------------------------|-------------------------------------------------------------------------------------|------|
| <b>1. Glycaemic control</b> |                                                                                                                                                                          |                      |                      |                                                               |                                     |                                             |                                                                                     |      |
| Blaha et al, 2009           | <ul style="list-style-type: none"> <li>CDSS (eMPC)</li> <li>Mathias protocol</li> <li>Bath-protocol</li> </ul>                                                           | ICU Nurses           | 40 adults            | Entire study time in target range (blood glucose)- mmol/l     | After 48hrs=46%                     | -                                           | Versus Mathias:<br>7.8% (-13.7 to 29.4)<br>Versus Bath<br>6.3% (-3.9 to 16.5)       |      |
|                             |                                                                                                                                                                          |                      | 40 adults            |                                                               | After 48hrs=38.2%                   |                                             |                                                                                     |      |
|                             |                                                                                                                                                                          |                      | 40 adults            |                                                               | After 48hrs=39.7%                   |                                             |                                                                                     |      |
|                             | <ul style="list-style-type: none"> <li>CDSS (eMPC)</li> <li>Mathias protocol</li> <li>Bath-protocol</li> </ul>                                                           | ICU Nurses           | 40 adults            | Entire study mean blood glucose (SE)- mmol/l                  | Baseline=8.1(0.6)<br>48hrs=5.9(0.2) | -2.2 mmol/l                                 | Versus Mathias:<br>-1 mmol/l<br>Versus Bath:<br>-0.7 mmol/l                         |      |
|                             |                                                                                                                                                                          |                      | 40 adults            |                                                               | Baseline=7.9(0.4)<br>48hrs=6.7(0.1) |                                             |                                                                                     |      |
|                             |                                                                                                                                                                          |                      | 40 adults            |                                                               | Baseline=8.0(0.2)<br>48hrs=6.5(0.2) |                                             |                                                                                     |      |
| Canbolat et al, 2019        | <ul style="list-style-type: none"> <li>CDSS (automated BG control)</li> <li>Standard protocol</li> </ul>                                                                 | Nurses<br>Physicians | 33 adults            | Occasions for BG out of target (120 to 180 mg/dL) range       | 22 months =2101/5789                | -                                           | -21.8% (-23.7 to -20.0)                                                             |      |
|                             |                                                                                                                                                                          |                      | 33 adults            |                                                               | 22 months =2977/5122                |                                             |                                                                                     |      |
|                             | <ul style="list-style-type: none"> <li>CDSS (automated BG control)</li> <li>Standard protocol</li> </ul>                                                                 |                      |                      | Occasions for BG out of target range due to insulin treatment | 22 months =745/5789                 | -                                           | -28.1% (-29.7 to -26.5)                                                             |      |
|                             |                                                                                                                                                                          |                      |                      |                                                               | 22 months =2099/5122                |                                             |                                                                                     |      |
| Cavalcanti et al, 2009      | <ul style="list-style-type: none"> <li>CDSS (computer-assisted insulin protocol)</li> <li>Control (Leuven protocol)</li> <li>Control (conventional treatment)</li> </ul> | ICU Nurses           | 56 adults            | Mean blood glucose (mmol/dL)                                  | 19 months =125                      | -                                           | Versus Leuven<br>-2.1 mmol/dL<br>Versus conventional<br>-33.5 mmol/dL               |      |
|                             |                                                                                                                                                                          |                      | 58 adults            |                                                               | 19 months =127.1                    |                                             |                                                                                     |      |
|                             |                                                                                                                                                                          |                      | 53 adults            |                                                               | 19 months =158.5                    |                                             |                                                                                     |      |
|                             | <ul style="list-style-type: none"> <li>CDSS (computer-assisted insulin protocol)</li> <li>Control (Leuven protocol)</li> <li>Control (conventional treatment)</li> </ul> | ICU Nurses           | 56 adults            | Patients with hypoglycaemia                                   | 19 months =12/56                    | -                                           | Versus Leuven<br>-20% (-36.6 to -3.4)<br>Versus conventional<br>17.6% (5.7 to 29.5) |      |
|                             |                                                                                                                                                                          |                      | 58 adults            |                                                               | 19 months =24/58                    |                                             |                                                                                     |      |
|                             |                                                                                                                                                                          |                      | 53 adults            |                                                               | 19 months =2/53                     |                                             |                                                                                     |      |
| Cleveringa et al, 2008      | <ul style="list-style-type: none"> <li>CDSS use in diabetic patients</li> <li>Usual care</li> <li>CDSS use in diabetic patients</li> </ul>                               | Nurses               | 1699 adults          | A1C<7%                                                        | Baseline=60.8%<br>1 year=68%        | 7.2%                                        | 4.6% (2.7 to 6.5)                                                                   |      |
|                             |                                                                                                                                                                          |                      | 1692 adults          |                                                               | Baseline=61.6%<br>1 Year=64.2%      |                                             |                                                                                     | 2.6% |
|                             |                                                                                                                                                                          |                      | 1699 adults          |                                                               | Baseline=41%<br>1 year=53.9%        |                                             |                                                                                     |      |
|                             |                                                                                                                                                                          |                      |                      | Systolic BP<140                                               |                                     | 12.9%                                       | 10.2% (7.9 to 12.5)                                                                 |      |

|                                        |                                 |            |              |                                                                            |                                      |       |                       |
|----------------------------------------|---------------------------------|------------|--------------|----------------------------------------------------------------------------|--------------------------------------|-------|-----------------------|
|                                        | • Usual care                    |            | 1692 adults  |                                                                            | Baseline=39.5%<br>1 year=42.2%       | 2.7%  |                       |
|                                        | • CDSS use in diabetic patients |            | 1699 adults  |                                                                            | Baseline=36.2%<br>1 year=49.0%       | 10.5% | 3.7% (1.2 to 6.2)     |
|                                        | • Usual care                    |            | 1692 adults  | Total cholesterol<br><4.5mmol/l                                            | Baseline=38.5%<br>1 year=45.3%       | 6.8%  |                       |
| Hovorka et al, 2007                    | • CDSS (eMPC)                   | ICU Nurses | 30 adults    | Proportion in target range (4-6.1 mmol/L)                                  | 48 hrs =60.4%                        | -     | 32.9% (20.0 to 46.0)  |
|                                        | • Usual care                    | ICU Nurses | 30 adults    |                                                                            | 48 hrs =27.5%                        |       |                       |
|                                        | • CDSS (eMPC)                   |            |              | Entire study mean blood glucose (mmol/L) (SD)                              | 48 hrs =6.2 (1.1)                    | -     | -1mmol/L              |
|                                        | • Usual care                    |            |              |                                                                            | 48 hrs =7.2 (1.1)                    |       |                       |
|                                        | • CDSS (eMPC)                   |            |              | Time in target range (hours)                                               | 48 hrs =14.5                         |       | 7.9 hrs               |
|                                        | • Usual care                    |            |              |                                                                            | 48 hrs =6.6                          |       |                       |
| Mann et al, 2011                       | • CDSS use                      | ICU Nurses | 18 adults    | Occasions glucose range on target (80 to 110 mg/dl)                        | 72 hrs =47%                          | -     | 6% (-7.7 to 19.7)     |
|                                        | • Paper protocol                | ICU Nurses | 18 adults    |                                                                            | 72 hrs =41%                          |       |                       |
|                                        | • CDSS use                      | ICU Nurses |              | Occasions over target range (over 110 mg/dl)                               | 72 hrs =49%                          | -     | -5% (-18.8 to 8.8)    |
|                                        | • Paper protocol                | ICU Nurses |              |                                                                            | 72 hrs =54%                          |       |                       |
|                                        | • CDSS use                      |            |              | Occasions under target (under 80 mg/dl) range                              | 72 hrs =4.5%                         | -     | -0.3% (-2.1 to 1.5)   |
|                                        | • Paper protocol                |            |              |                                                                            | 72 hrs =4.8%                         |       |                       |
| Plank et al, 2006                      | • CDSS (MPC) use                | ICU Nurses | Not reported | Occasions within the target glycaemic range (80-110 mg/dl)                 | 48 hrs =52%                          | -     | 33% (20.5 to 45.4)    |
|                                        | • Usual care                    | ICU Nurses | Not reported |                                                                            | 48 hrs =19%                          |       |                       |
|                                        | • CDSS (MPC) use                | ICU Nurses | Not reported | Improvement glycaemic control for 48 hours                                 | 48 hrs =65%                          | -     | 40% (27.4 to 52.6)    |
|                                        | • Usual care                    | ICU Nurses | Not reported |                                                                            | 48 hrs =25%                          |       |                       |
|                                        | • CDSS (MPC) use                |            | Not reported | Occasions over the target glycaemic range (>110 mg/dl)                     | 48 hrs =46%                          | -     | -31% (-43.7 to -18.2) |
|                                        | • Usual care                    |            | Not reported |                                                                            | 48 hrs =77%                          |       |                       |
|                                        | • CDSS (MPC) use                |            | Not reported | Average glucose (mg/dl)                                                    | 48 hrs =117mg/dL                     | -     | -14mg/dL              |
|                                        | • Usual care                    |            | Not reported |                                                                            | 48 hrs =131 mg/dL                    |       |                       |
| <b>2. Blood coagulation management</b> |                                 |            |              |                                                                            |                                      |       |                       |
| Fitzmaurice et al, 2000                | • CDSS use                      | Nurses     | 122 adults   | proportion of tests in range                                               | Baseline=223/366<br>1 year =732/1181 | 1.1%  | -1.9% (-3.1 to -0.7)  |
|                                        | • CDSS non-use                  | Physicians | 245 adults   |                                                                            | Baseline=264/480<br>1 year =986/1700 | 3%    |                       |
|                                        | • CDSS use                      | Nurses     |              | International Normalised Ratio (INR) Results Within Range Point Prevalence | Baseline=74/118<br>1 year =86/121    | 8.4%  | -2.6% (-5.3 to -0.1)  |
|                                        | • CDSS non-use                  | Physicians |              |                                                                            | Baseline=129/244                     | 11%   |                       |

|                                                             |                     |                       |              |                                                     |                                    |       |                         |
|-------------------------------------------------------------|---------------------|-----------------------|--------------|-----------------------------------------------------|------------------------------------|-------|-------------------------|
|                                                             |                     |                       |              |                                                     | 1 year =157/245                    |       |                         |
|                                                             | • CDSS use          | Nurses                |              | Time Spent Within INR Target Range                  | Baseline=64/113<br>1 year =76/110  | 12%   | 7% (-0.7 to 14.7)       |
|                                                             | • CDSS non-use      | Physicians            |              |                                                     | Baseline=99/174<br>1 year= 143/230 | 5%    |                         |
| <b>3. Antenatal and peripartum care</b>                     |                     |                       |              |                                                     |                                    |       |                         |
| Dalaba et al, 2015                                          | • CDSS use          | Nurses                | Not reported | Antenatal complications per 1000 attendance         | Before=9<br>After =12              | 0.3%  | 0.3% (-0.03 to 0.6)     |
|                                                             | • CDSS non-use      | Nurses                | Not reported |                                                     | Before =16<br>After =16            | 0%    |                         |
|                                                             | • CDSS use          |                       |              | Delivery complications per 1000 attendances         | Before=107<br>After=96             | -0.9% | 2.4% (1.1 to 3.7)       |
|                                                             | • CDSS non-use      |                       |              |                                                     | Before=133<br>After=100            | -3.3% |                         |
| <b>4. Managing patients with chronic co-morbid diseases</b> |                     |                       |              |                                                     |                                    |       |                         |
| McDonald et al, 2017                                        | • CDSS use          | 165 Nurses            | 2550 adults  | Medication regimen complexity index <24.5           | Post-test=158/2550                 | -     | 0% (-1.1 to 1.1)        |
|                                                             | • Usual care        | 335 Nurses            | 5369 adults  |                                                     | Post-test =333/5369                |       |                         |
|                                                             | • CDSS use          | 165 Nurses            | 2550 adults  | Emergency room use                                  | Post-test =421/2550                | -     | -0.2 (-1.9 to 1.6)      |
|                                                             | • Usual care        | 335 Nurses            | 5369 adults  |                                                     | Post-test =897/5369                |       |                         |
|                                                             | • CDSS use          | 165 Nurses            | 2550 adults  | Hospitalisation                                     | Post-test =502/2550                | -     | -1.4% (-3.3 to 0.5)     |
|                                                             | • Usual care        | 335 Nurses            | 5369 adults  |                                                     | Post-test =1133/5369               |       |                         |
| Lv et al, 2019                                              | • CDSS use          | Nurses                | 70 children  | Number of asthma exacerbations per patient (median) | 1 year=3                           | -     | -1                      |
|                                                             | • Usual care        | Nurses                | 73 children  |                                                     | 1 year=4                           | -     |                         |
| <b>5. Outpatient obesity screening</b>                      |                     |                       |              |                                                     |                                    |       |                         |
| Lee et al, 2009                                             | • CDSS use          | 13 Nurses             | 807 adults   | Encounters with obesity related diagnosis           | 8 months =91/807                   | -     | 10.3% (8.0 to 12.5)     |
|                                                             | • Usual care        | 16 Nurses             | 997 adults   |                                                     | 8 months =10/997                   |       |                         |
|                                                             | • CDSS use          | 13 Nurses             | 807 adults   | Encounters with missed obesity-related diagnosis    | 8 months =51/208                   | -     | -41.9% (-48.8 to -35.1) |
|                                                             | • Usual care        | 16 Nurses             | 997 adults   |                                                     | 8 months =440/662                  |       |                         |
| <b>6. Fall and pressure ulcer management</b>                |                     |                       |              |                                                     |                                    |       |                         |
| Beeckman et al, 2013                                        | • CDSS(Pre-vPlan)   | 65 Nurses and physios | 225 adults   | Pressure ulcer prevention                           | Day1=15/58<br>Day120=41/65         | 37.2% | 2.3% (-11.0 to 15.6)    |
|                                                             | • Standard protocol | 53 Nurses and physios | 239 adults   |                                                     | Day1=16/63<br>Day120=41/68         | 34.9% |                         |
|                                                             | • CDSS(Pre-vPlan)   | 65 Nurses and physios | 225 adults   |                                                     | Day 1=34/225<br>Day120=16/225      | -8%   | -6.3% (-10.2 to -2.4)   |

|                    |                     |                       |               |                                              |                                      |                                      |                                     |
|--------------------|---------------------|-----------------------|---------------|----------------------------------------------|--------------------------------------|--------------------------------------|-------------------------------------|
|                    | • Standard protocol | 53 Nurses and physios | 239 adults    | Prevalence of pressure ulcer                 | Day1=39/239<br>Day120=35/239         | -1.7%                                |                                     |
| Byrne,2005         | • CDSS use          | 89 Nurses             | Not reported  | Fall rate                                    | Before=0.312<br>After=0.318          | 0.6%                                 | 3.1%                                |
|                    | • CDSS non-use      |                       | Not reported  |                                              | before=0.315<br>After=0.29           | -2.5%                                |                                     |
|                    | • CDSS use          |                       | Not reported  | Pressure ulcer rate                          | Before=0.085<br>After=0.088          | -0.3%                                | -0.6%                               |
|                    | • CDSS non-use      |                       | Not reported  |                                              | Before=0.091<br>After=0.094          | 0.3%                                 |                                     |
| Dowding et al,2012 | • CDSS use          |                       |               | Fall rate                                    | Post-CDSS use Vs pre-CDSS use period | -                                    | 0.91 (0.75 to 1.12) <sup>†</sup>    |
|                    | • CDSS non-use      |                       |               |                                              | HAPU ratio                           | Post-CDSS use Vs pre-CDSS use period | -                                   |
| Dykes et al, 2009  | • CDSS use          | Nurses                | 5160 adults   | Fall rate difference (per 1000 patient days) | CDSS use Vs usual care               | -                                    | -1.16 (-2.16 to -0.17) <sup>†</sup> |
|                    | • Usual care        | Nurses                | 5104 adults   |                                              |                                      |                                      |                                     |
| Dykes et al, 2020  | • UDSS use          | Nurses                | 19,283 adults | Fall rate difference (per 1000 patient days) | Post-CDSS use Vs pre-CDSS use period | -                                    | -0.15 (-0.04 to -0.25) <sup>†</sup> |
|                    | • CDSS non-use      | Nurses                | 17,948 adults |                                              |                                      |                                      |                                     |
| Fossum et al,2011  | • CDSS use          | Nurses                | 367 adults    | Prevalence of pressure Ulcers                | Before=16/167<br>After=23/200        | 1.9%                                 | 4.2% (0.2 to 8.2)                   |
|                    | • CDSS non-use      | Nurses                | 274 adults    |                                              | Before=17/150<br>After=11/122        | -2.3%                                |                                     |
|                    | • CDSS use          |                       |               | Prevalence of malnutrition                   | Before=45/161<br>After=39/199        | -8.3%                                | -12.4% (-19.1 to -5.7)              |
|                    | • CDSS non-use      |                       |               |                                              | Before=31/148<br>After=30/120        | 4.1%                                 |                                     |

### 7. Triaging

|                      |                   |            |                |                                             |                      |   |                         |
|----------------------|-------------------|------------|----------------|---------------------------------------------|----------------------|---|-------------------------|
| Bennett et al, 2016  | • CDSS use period | Nurses     | 400 adults     | Correct triage prioritisation               | Post-test=85.2%      | - | 24.7% (18.8 to 30.6)    |
|                      | • CDSS non-use    | Nurses     | 400 adults     |                                             | Pre-test=60.5%       |   |                         |
| Lattimer et al, 1998 | • CDSS            | Nurses     | Not applicable | Calls managed with telephone advice from GP | Post-test =1109/7184 | - | -34.2% (-35.6 to -32.8) |
|                      | • Usual care      | Physicians | Not applicable |                                             | Post-test =3629/7308 |   |                         |
|                      | • CDSS            | Nurses     |                | Patient attended primary care centre        | Post-test =1177/7184 | - | -10% (-11.4 to -8.8)    |
|                      | • Usual care      | Physicians |                |                                             | Post-test =1934/7308 |   |                         |
| Lattimer et al, 2000 | • CDSS            | Nurses     |                | Patient visited at home by duty GP          | Post-test =1317/7184 | - | -5.5% (-6.9 to -4.2)    |
|                      | • Usual care      | Physicians |                |                                             | Post-test =1745/7308 |   |                         |
|                      | • CDSS            | Nurses     |                | Total admissions within 3 days              | 1 year =428/7184     | - | -0.98% (-1.8 to -0.2)   |
|                      | • Usual care      | Physicians |                |                                             | 1 year =507/7308     |   |                         |
|                      | • CDSS            | Paramedics | 436 adults     |                                             | 1 year =183/436      | - | 5.2% (-1.7 to 12.1)     |



|                                                      |              |            |            |                                                                         |                    |   |                                     |
|------------------------------------------------------|--------------|------------|------------|-------------------------------------------------------------------------|--------------------|---|-------------------------------------|
| Snooks et al, 2014                                   | • Control    | Paramedics | 343 adults | Patients left at scene without conveyance to emergency department       | 1 year =126/343    |   |                                     |
|                                                      | • CDSS       |            | 436 adults | Patients with further emergency admission to hospital or death          | 1 year=69/436      | - | 1.5% (-3.5 to 6.6)                  |
|                                                      | • Control    |            | 343 adults | Patients with ED attendance or emergency admission to hospital or death | 1 year =49/343     |   |                                     |
|                                                      | • CDSS       |            |            |                                                                         | 1 year =92/436     | - | 3.3% (-2.3 to 8.9)                  |
|                                                      | • Control    |            |            |                                                                         | 1 year =61/343     |   |                                     |
|                                                      | • CDSS       |            |            | Patients who reported >1 further fall                                   | 1 year =135/236    | - | -6.8% (-16.3 to 2.7)                |
|                                                      | • Control    |            |            |                                                                         | 1 year =112/175    |   |                                     |
| <b>8. Quality of life and patients' satisfaction</b> |              |            |            |                                                                         |                    |   |                                     |
| Cleveringa et al, 2010                               | • CDSS use   |            |            | Life-years gained                                                       | CDSS Vs usual care | - | 0.14 (-0.12 to 0.40) <sup>‡</sup>   |
|                                                      | • Usual care |            |            |                                                                         |                    |   |                                     |
|                                                      | • CDSS use   |            |            | Healthy years (QALYs, discounted)                                       | CDSS Vs usual care | - | 0.037 (-0.066 to 0.14) <sup>‡</sup> |
|                                                      | • Usual care |            |            |                                                                         |                    |   |                                     |
| Snooks et al, 2014                                   | • CDSS       | Paramedics | 239 adults | Quality of Life (SF12 MCS), mean (SD)                                   | 1 year =41.9(10.3) |   | -1 (-3.1 to 1.1)                    |
|                                                      | • Control    | Paramedics | 177 adults |                                                                         | 1 year =42.9(10.9) | - |                                     |
|                                                      | • CDSS       | Paramedics | 239 adults | Quality of Life (SF12 PCS), mean (SD)                                   | 1 year=29(8)       |   | -1 (-2.6 to 0.6)                    |
|                                                      | • Control    | Paramedics | 177 adults |                                                                         | 1 year=30(8.5)     | - |                                     |
|                                                      | • CDSS       | Paramedics | 228 adults | Patient satisfaction (QC Technical), mean (SD)                          | 1 year =97.8(10.7) |   | -0.4 (-2.4 to 1.6)                  |
|                                                      | • Control    | Paramedics | 165 adults |                                                                         | 1 year=98.2(9.4)   | - |                                     |

Note: ‡, calculated from reported information unless stated otherwise; †, as reported by study authors.

Supplementary Table 5: Summary of Health professionals' knowledge, beliefs and behaviour results

| Author & Year        | Interventions            | Health professionals  | patient participants | Outcome measured                                                                   | Outcome values reported | Change of value within a group <sup>‡</sup> | Mean or risk difference (95% CI) <sup>‡</sup> |
|----------------------|--------------------------|-----------------------|----------------------|------------------------------------------------------------------------------------|-------------------------|---------------------------------------------|-----------------------------------------------|
| Beeckman et al, 2013 | • CDSS(Pre-vPlan)        | 65 Nurses and physios | 225 adults           | Positive knowledge change                                                          | Baseline=28/65          | 8.9%                                        | 6.5% (0.8 to 13.2)                            |
|                      | • Standard protocol      | 53 Nurses and physios | 239 adults           |                                                                                    | 5 months=26/50          | 2.4%                                        |                                               |
|                      | • CDSS(Pre-vPlan)        | 65 Nurses and physios | 225 adults           | Positive attitude change                                                           | Baseline=48/65          | 10.2%                                       | 12.7% (5.9 to 19.5)                           |
|                      | • Standard protocol      | 53 Nurses and physios | 239 adults           |                                                                                    | 5 months=42/50          | -2.5%                                       |                                               |
| Cortez, 2014         | • CDSS (drop-down boxes) | 26 Nurses             | NA                   | Research utilisation                                                               | Baseline=35%            | 3%                                          | 9% (3.3 to 14.7)                              |
|                      | • Control                | 24 Nurses             | NA                   |                                                                                    | 11 weeks=38%            | -6%                                         |                                               |
| Dumont et al,2012    | • CDSS use               | Nurses (OA=44)        | 141 adults           | Nurses satisfaction, out of 10 (mean (SD))                                         | 4 months=8.4(1.4)       | -                                           | 3.6 (2.4 to 4.8)                              |
|                      | • Paper protocol         | Nurses                | 159 adults           |                                                                                    | 4 months=4.8(2.4)       |                                             |                                               |
|                      | • CDSS use               |                       |                      | perception of how often needed to deviate from the protocol, out of 10 (mean (SD)) | 4 months=2.7(2.2)       | -                                           | -4.7 (-6.1 to -3.3)                           |
|                      | • Paper protocol         |                       |                      |                                                                                    | 4 months=7.4(2.4)       |                                             |                                               |
| Sassen et al,2014    | • CDSS use               | 42 nurses and physios | Not reported         | Behaviour, mean (SD)                                                               | Baseline=4.5 (1.02)     | 0.1 (0.93)                                  | 0.1 (-0.32 to 0.53)                           |
|                      | • Control                | 27 nurses and physios | Not reported         |                                                                                    | 17 months=4.6 (0.85)    | 0 (0.75)                                    |                                               |
|                      | • CDSS use               | 42 nurses and physios |                      | Intention, mean (SD)                                                               | baseline=4.8 (0.69)     | 0.2 (1.05)                                  | 0.3 (-0.22 to 0.82)                           |
|                      | • Control                | 27 nurses and physios |                      |                                                                                    | 17 months=4.8 (0.82)    | -0.1(1.05)                                  |                                               |
|                      | • CDSS use               | 42 nurses and physios |                      | Attitude, mean (SD)                                                                | Baseline=6.3 (1.0)      | 0.0(0.05)                                   | -0.1 (-0.13 to -0.07)                         |
|                      | • Control                | 27 nurses and physios |                      |                                                                                    | 17 months=6.1 (1.1)     | 0.1 (0.09)                                  |                                               |
|                      | • CDSS use               | 42 nurses and physios |                      | Perceived behavioural control, mean (SD)                                           | Baseline=5.9 (1.15)     | 0.3 (0.77)                                  | -0.1 (-0.49 to 0.29)                          |
| • Control            | 27 nurses and physios    |                       | 17 months=6.0 (0.91) |                                                                                    |                         |                                             |                                               |

|            |                       |                                |                                             |             |                     |
|------------|-----------------------|--------------------------------|---------------------------------------------|-------------|---------------------|
| • Control  | 27 nurses and physios |                                | Baseline=4.9 (0.87)<br>17 months=5.3 (0.8)  | 0.4 (0.85)  |                     |
| • CDSS use | 42 nurses and physios | Subjective norms,<br>mean (SD) | Baseline=5.5 (0.55)<br>17 months=5.6 (0.63) | 0.1 (0.59)  | 0 (0.34 to 0.34)    |
| • Control  | 27 nurses and physios |                                | Baseline=5.6 (0.93)<br>17 months=5.7 (0.76) | 0.1 (0.84)  |                     |
| • CDSS use | 42 nurses and physios | Moral norms, mean<br>(SD)      | Baseline=6.0 (0.63)<br>17 months=6.2 (0.7)  | 0.2 (0.67)  | 0.1 (-0.21 to 0.41) |
| • Control  | 27 nurses and physios |                                | Baseline=6.2 (0.59)<br>17 months=6.3 (0.55) | 0.1 (0.57)  |                     |
| • CDSS use | 42 nurses and physios | Barriers, mean (SD)            | Baseline=3.1 (1.17)<br>17 months=3.2 (1.12) | 0.1 (1.14)  | 0.3 (-0.23 to 0.83) |
| • Control  | 27 nurses and physios |                                | Baseline=2.8 (1.01)<br>17 months=2.6 (0.96) | -0.2 (0.98) |                     |

Note: ‡, calculated from reported information unless stated otherwise; †, as reported by study authors.

**Supplementary Table 6: Summary of adverse events results**

| Author & Year          | Interventions                   | Health professionals | patient participants | Outcome measured                | Outcome values reported | Risk difference (95% CI) <sup>‡</sup> |
|------------------------|---------------------------------|----------------------|----------------------|---------------------------------|-------------------------|---------------------------------------|
| Cleveringa et al,2010  | • CDSS use in diabetic patients | Nurses               | 1699 adults          | cardiovascular events occurring | CDSS Vs usual care      | -11% (-18 to -4) <sup>†</sup>         |
|                        | • Usual care                    | Nurses               | 1692 adults          |                                 |                         |                                       |
| Fitzmaurice et al,2000 | • CDSS Nurse                    | Nurses               | 224 adults           | Serious adverse reaction events | 1 year =3 (1.3%)        | -5.7% (-10.1 to -1.2)                 |
|                        | • CDSS non-use                  | Physicians           | 143 adults           |                                 | 1 year =10 (7%)         |                                       |
|                        | • CDSS Nurse                    | Nurses               | 224 adults           | Deaths                          | 1 year =3 (1.3%)        | -5% (-9.2 to -0.7)                    |
|                        | • CDSS non-use                  | Physicians           | 143 adults           |                                 | 1 year =9 (6.3%)        |                                       |
| Snooks et al, 2014     | CDSS                            | 17 Paramedics        | 436 adults           | Patients dying                  | 1 year =19/436 (4.4%)   | 1.2% (-1.5 to 3.8)                    |
|                        | Control                         | 19 Paramedics        | 343 adults           |                                 | 1 year=11/343 (3.2%)    |                                       |

Note: ‡, calculated from reported information unless stated otherwise; †, as reported by study authors.

Supplementary Table 7: Summary of economic costs and consequences results

| Author & Year          | Interventions | Health professionals | patient participants | Outcome measured                                        | Outcome values reported | Difference (95% CI) <sup>†</sup>         |
|------------------------|---------------|----------------------|----------------------|---------------------------------------------------------|-------------------------|------------------------------------------|
| Cleveringa et al, 2010 | • CDSS use    | Nurses               |                      | Diabetes-related costs (excluding CHD)-€ discounted     | CDSS Vs usual care      | 1,698.00 (187 to 3,209) <sup>†</sup>     |
|                        | • Usual care  | Nurses               |                      |                                                         |                         |                                          |
|                        | • CDSS use    |                      |                      | Cardiovascular disease cost-€ discounted                | CDSS Vs usual care      | -587.00 (-880 to -294) <sup>†</sup>      |
|                        | • Usual care  |                      |                      |                                                         |                         |                                          |
|                        | • CDSS use    |                      |                      | Diabetic care protocol cost-€ discounted                | CDSS Vs usual care      | 316.00 (315 to 318) <sup>†</sup>         |
|                        | • Usual care  |                      |                      |                                                         |                         |                                          |
| Guerts et al, 2017     | • CDSS use    | Nurses               | 113 children         | Average emergency department visit costs (Euro)         | 156.4                   | 0.00                                     |
|                        | • Usual care  | Nurses               | 109 children         |                                                         | 156.4                   |                                          |
|                        | • CDSS use    |                      |                      | Average diagnostics cost (Euro)                         | 1.09                    | -0.46                                    |
|                        | • Usual care  |                      |                      |                                                         | 1.55                    |                                          |
|                        | • CDSS use    |                      |                      | Average treatment cost (Euro)                           | 4.48                    | 1.90                                     |
|                        | • Usual care  |                      |                      |                                                         | 2.58                    |                                          |
| Lattimer et al, 2000   | • CDSS use    |                      |                      | Average follow-up/hospitalization (Euro)                | 134.                    | 26.60                                    |
|                        | • Usual care  |                      |                      |                                                         | 107.4                   |                                          |
|                        | • CDSS use    |                      |                      | Average costs of missed diagnoses/adverse events (Euro) | 49.70                   | -32.10                                   |
|                        | • Usual care  |                      |                      |                                                         | 81.8                    |                                          |
|                        | • CDSS use    |                      |                      | Average cost of CDSS implementation (Euro)              | 61.95                   | 61.95                                    |
|                        | • Usual care  |                      |                      |                                                         | 0.0                     |                                          |
|                        | • CDSS use    |                      |                      | Overall average cost                                    | 408                     | 58.00                                    |
|                        | • Usual care  |                      |                      |                                                         | 350                     |                                          |
| Snooks et al, 2014     | • CDSS        | Paramedics           | Not applicable       | Net savings [of CDSS use] in a year (£)                 | CDSS Vs usual care      | 13,185 (-77,509 to 123,824) <sup>†</sup> |
|                        | • Usual care  | Physicians           | Not applicable       |                                                         |                         |                                          |
|                        | • CDSS        |                      |                      | Cost saved from inpatient stay                          | CDSS Vs usual care      | 51,059 <sup>†</sup>                      |
| Snooks et al, 2014     | • Usual care  |                      |                      |                                                         |                         |                                          |
|                        | • CDSS        | Paramedics           |                      | Implementing cost of CCDS in one month (in 100s £)      | 74                      | 74                                       |
|                        | • Control     | Paramedics           |                      |                                                         |                         |                                          |
|                        | • CDSS        |                      |                      | Total cost of implementation in one month (in 100s £)   | 2,773                   | 247 (-247 to 741) <sup>†</sup>           |
| • Control              |               |                      |                      | 2,526                                                   |                         |                                          |
| • CDSS                 |               |                      | Net resources saved  |                                                         | 39 <sup>†</sup>         |                                          |

|           |                                  |                 |                                       |
|-----------|----------------------------------|-----------------|---------------------------------------|
| • Control | by CDSS per patient year (£)     |                 |                                       |
| • CDSS    | Net cost resources saved by CCDS |                 | 208-308 <sup>‡</sup>                  |
| • Control | per patient year (£)             |                 |                                       |
| • CDSS    | Mean length of Job cycle time    | CDSS Vs control | 8.9 min (2.3 to 15.3) <sup>†</sup>    |
| • Control | (minutes)                        |                 |                                       |
| • CDSS    | Mean length of episode of care   | CDSS Vs control | -5.7 min (-38.5 to 27.2) <sup>†</sup> |
| • Control | (minutes)                        |                 |                                       |

Note: ‡, calculated from reported information unless stated otherwise; †, as reported by study authors; PCS, physical component summary; MCS, mental component summary; SF, Short-Form
